# Supplementary material
Source: MDPI journal article supplement (https://www.mdpi.com/search?q=pharmaceuticals-13-00338)
Supplement: s001 [file pharmaceuticals-13-00338-s001.pdf]

# SUPPLEMENTARY MATERIALS

„Corpora non agunt nisi fixata” Paul Ehrlich

## A proline-based tectons and supramolecular synthons for drug design 2.0: A case study of ACEI

Joanna Bojarska<sup>1\*</sup>, Milan Remko<sup>2</sup>, Martin Breza<sup>3</sup>, Izabela Madura<sup>4</sup>, Andrzej Fruziński<sup>1</sup> and Wojciech M. Wolf<sup>1</sup>

<sup>1</sup> Institute of General and Ecological Chemistry, Lodz University of Technology, Faculty of Chemistry, Żeromskiego 116, Lodz, 90- 924, Poland; wojciech.wolf@p.lodz.pl (W.M.W.); joanna.bojarska@p.lodz.pl (J.B.); andrzej.fruziński@p.lodz.pl (A.F.)

<sup>2</sup> Remedika, Sustekova 1, 85104, Bratislava, Slovakia; milan.remko@gmail.com (M.R.)

<sup>3</sup> Department of Physical Chemistry, Slovak Technical University, Radlinskeho 9, SK-81237 Bratislava, Slovakia; martin.breza@stuba.sk (M.B.)

<sup>4</sup> Warsaw University of Technology, Faculty of Chemistry, Noakowskiego 3, 00-664, Warsaw, Poland; izabela@ch.pw.edu.pl (I.D.M.)

\* Correspondence: joanna.bojarska@p.lodz.pl; Tel.: +48 42 631 31 19.

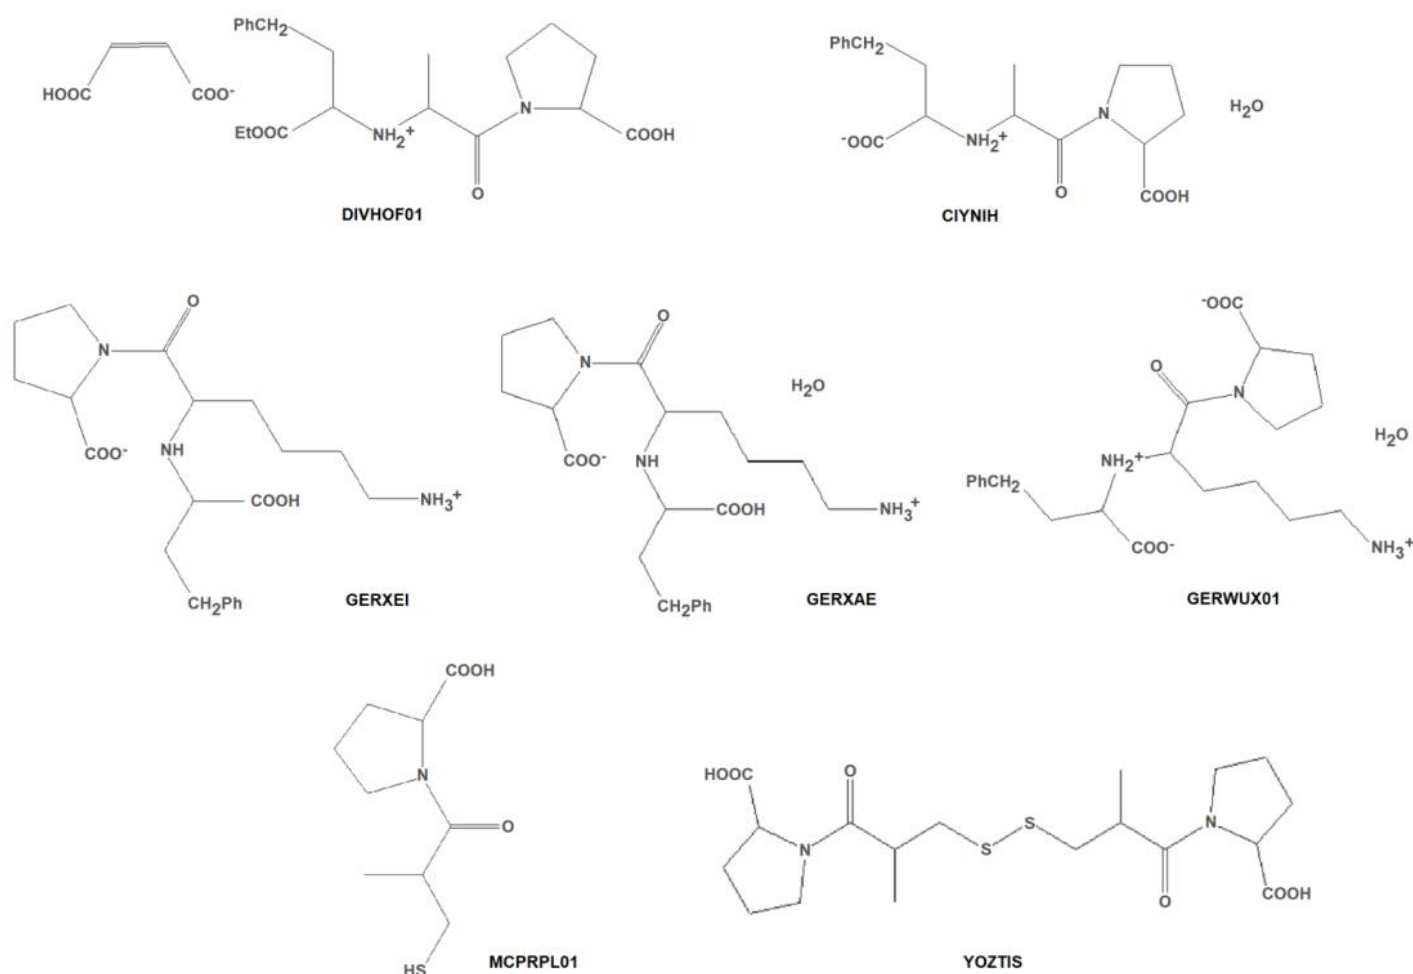

Scheme S1. Proline-based ACEI.

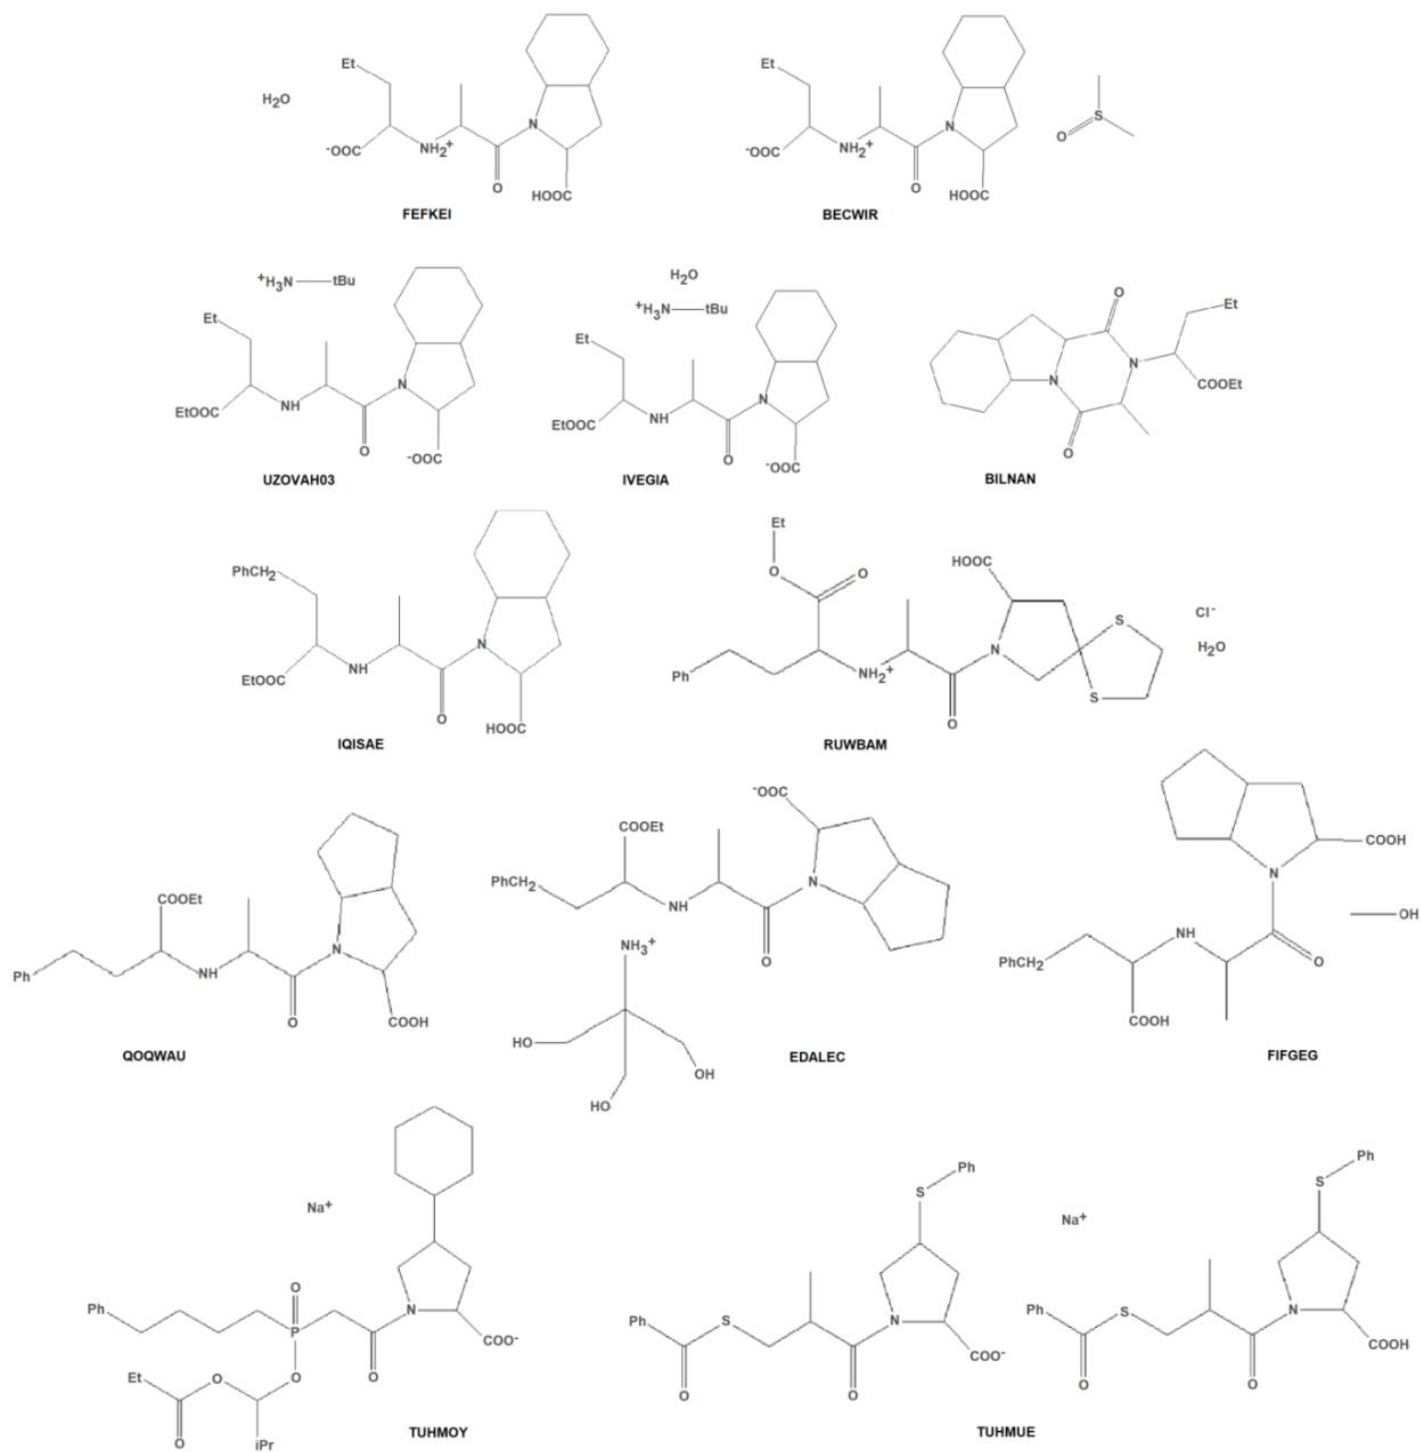

Scheme S2. Modified proline-based EI and their derivatives.

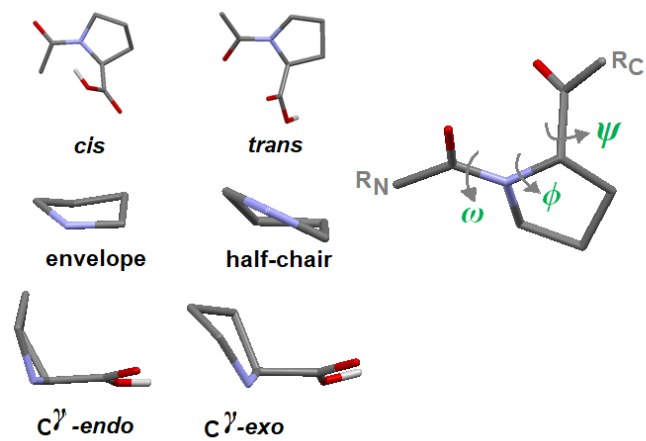

**Scheme S3.** Conformational properties for proline: type of isomer, conformation of 5-membered ring and puckers of pyrrolidine ring.

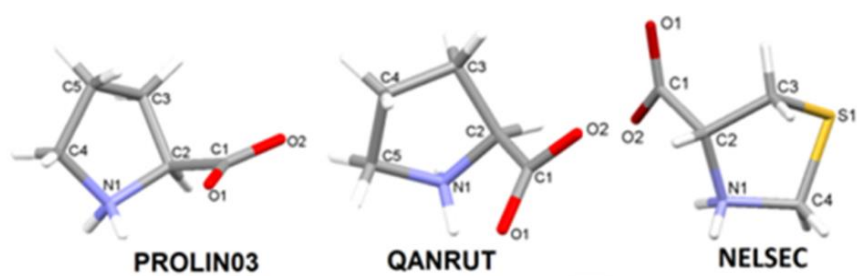

**Figure S1.** Molecular diagrams of proline structures, retrieved from the  D.

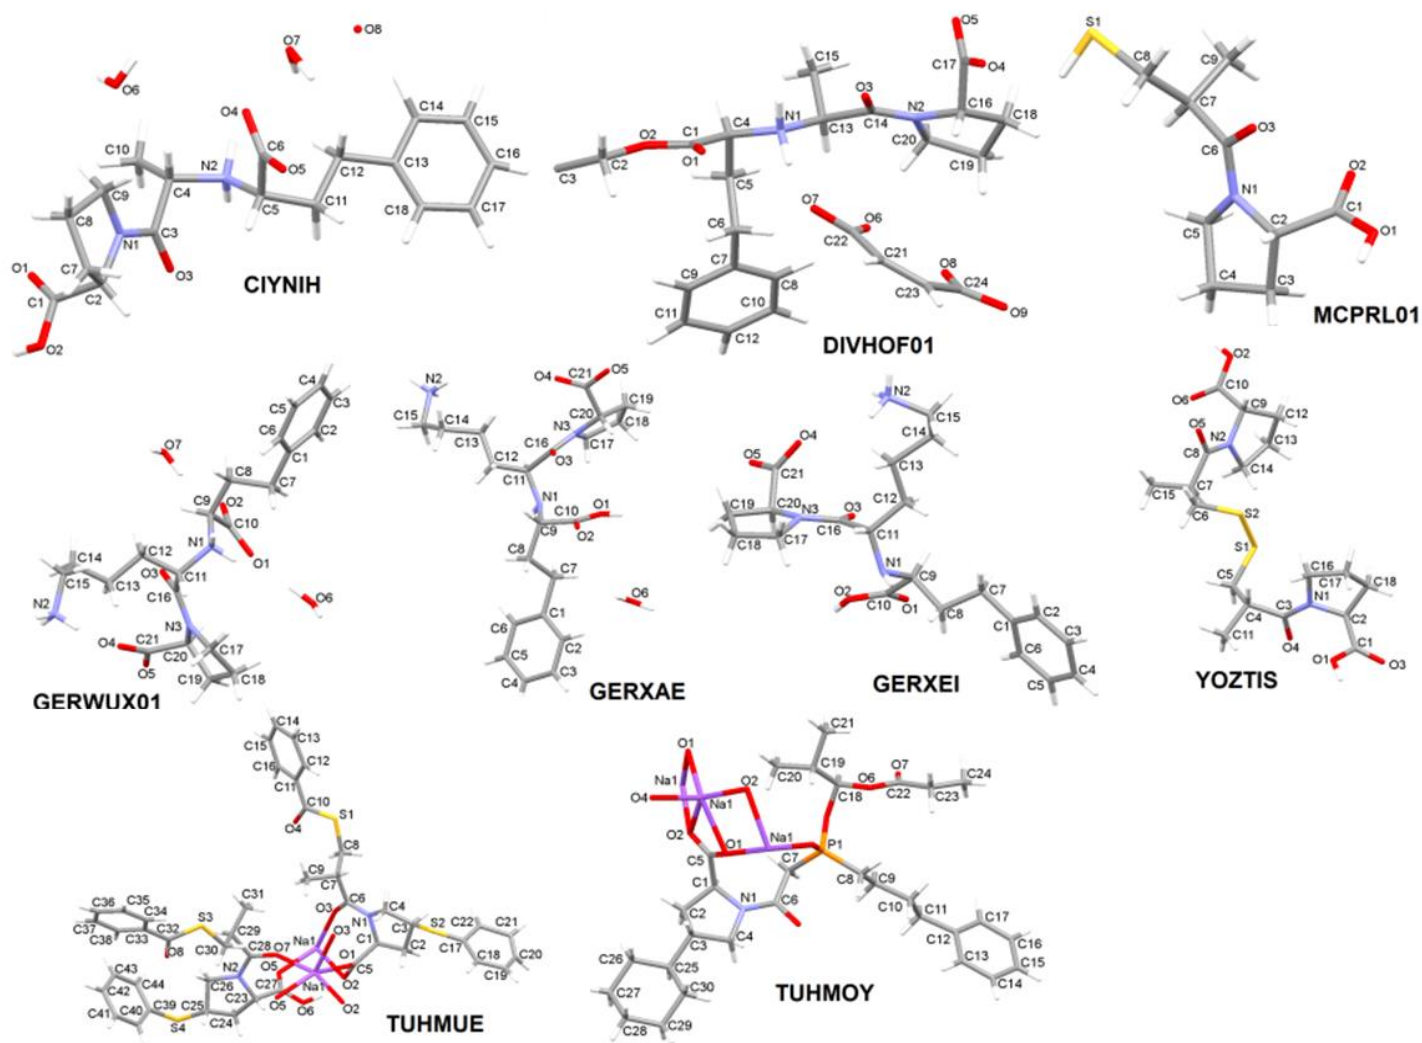

Figure S2. Molecular diagrams of crystal structures of proline-based ACEI.

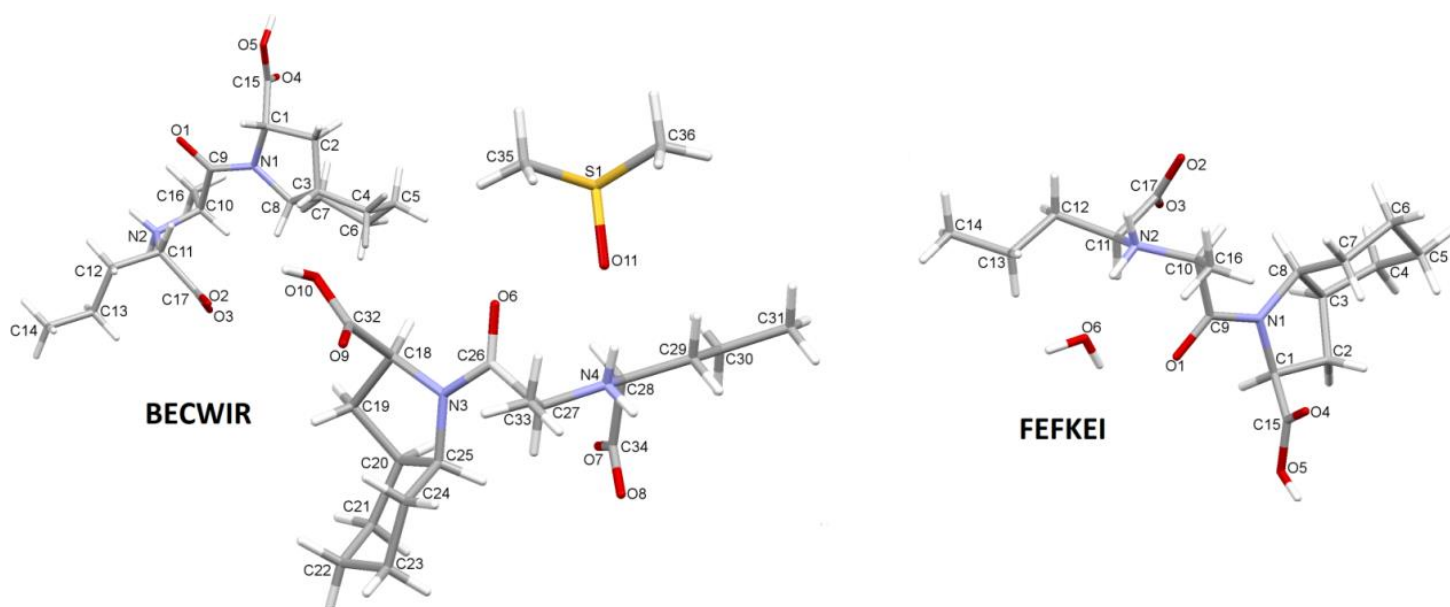

Figure S3. Molecular diagrams of perindoprilat structures.

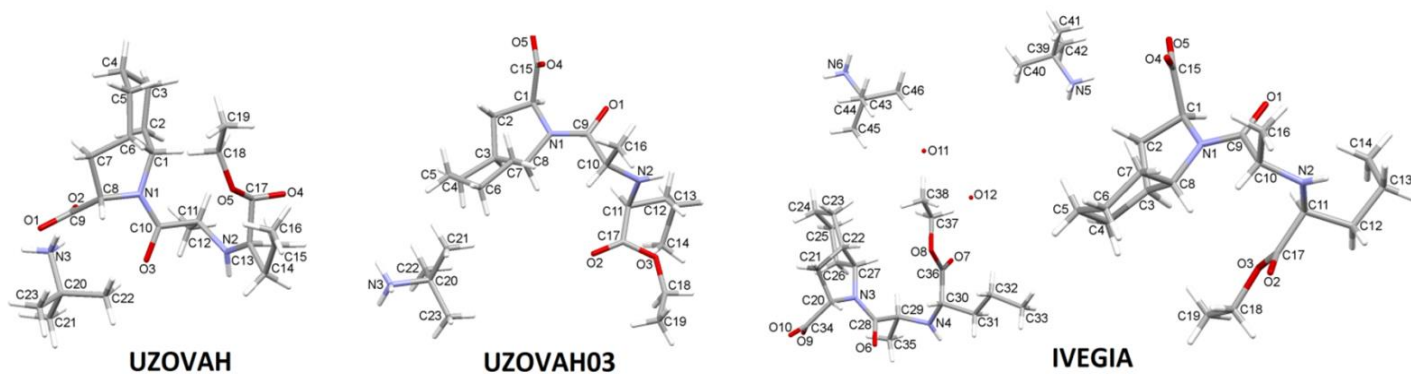

Figure S4. Molecular diagrams of perindopril erbumine structures.

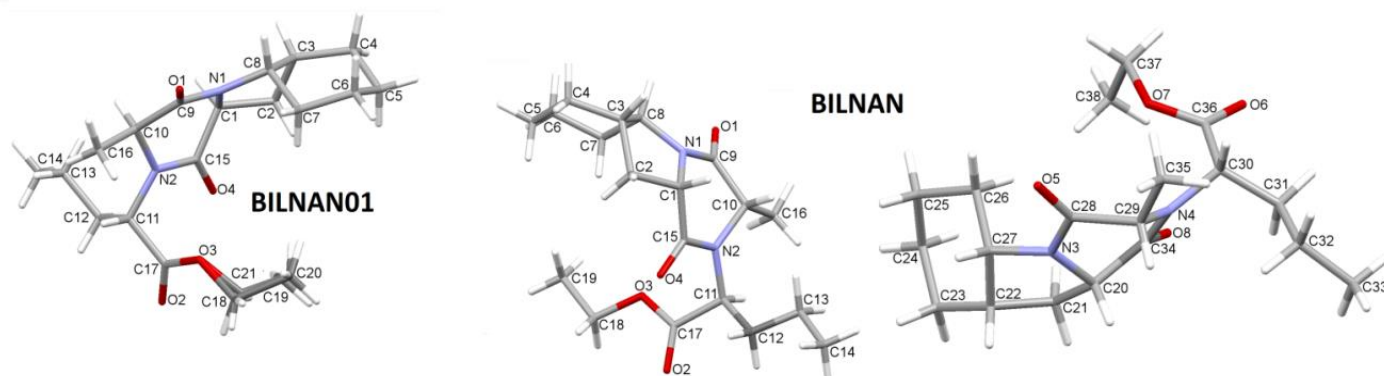

Figure S5. Molecular diagrams of KP perindopril erbumine structures.

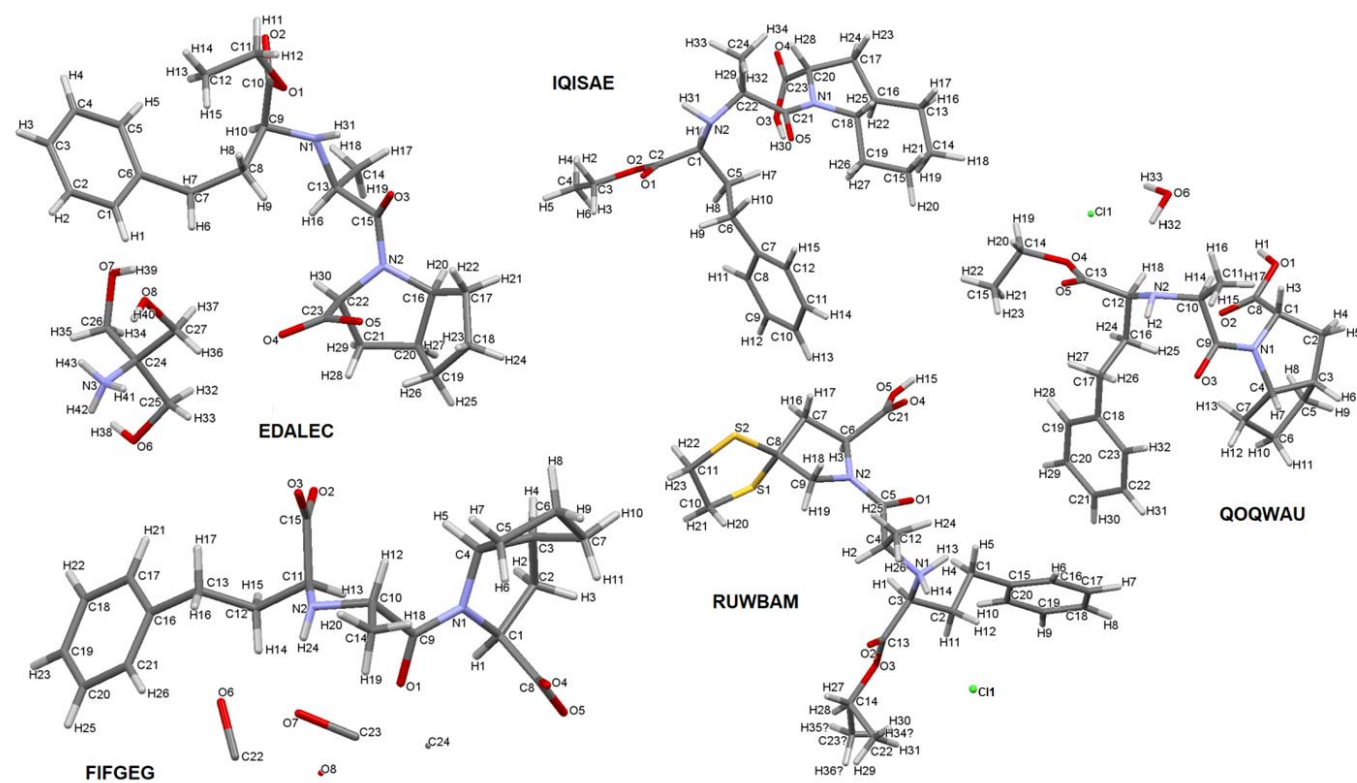

Figure S6. Molecular diagrams of other modified proline-based ACEI crystal structures.

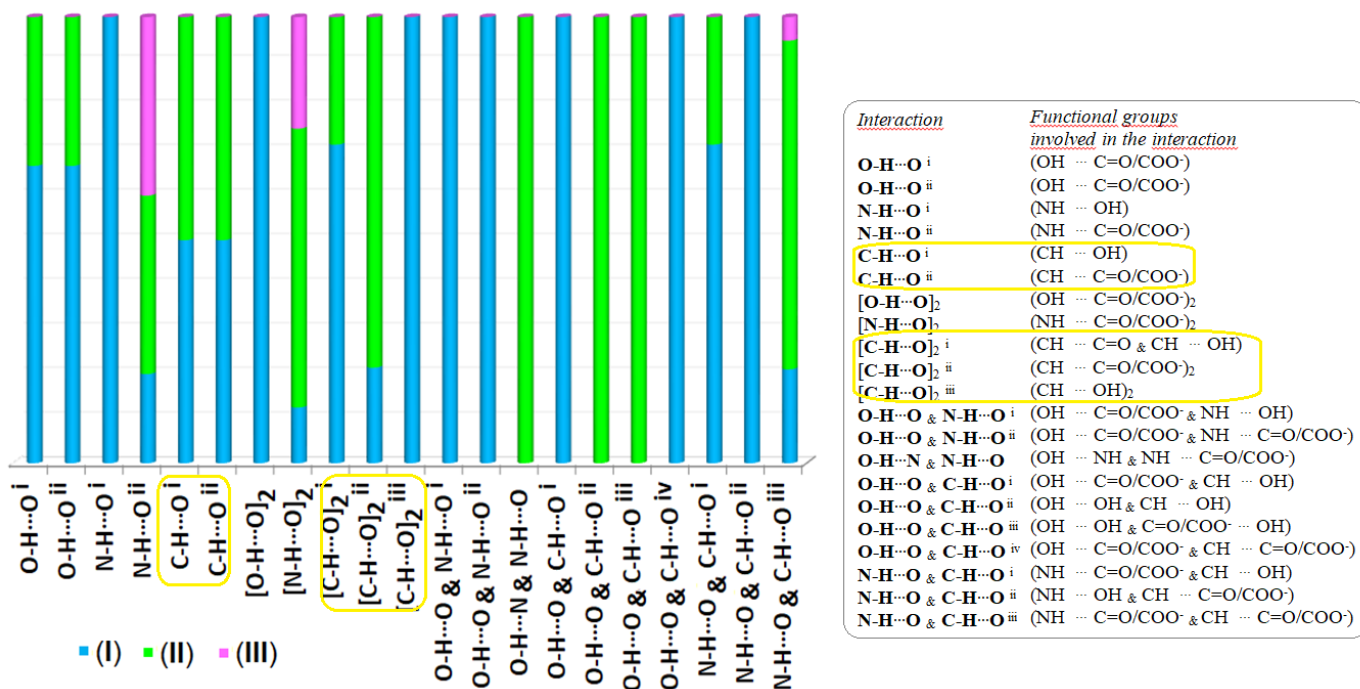

**Figure S7.** Occurrence of interactions, which form proline-based synthon patterns in three types of investigated proline and ACEI structures [(I): (N-C) COOH; (II): (N-C); COO<sup>-</sup> (III): NH<sub>2</sub><sup>+</sup> COO<sup>-</sup>].

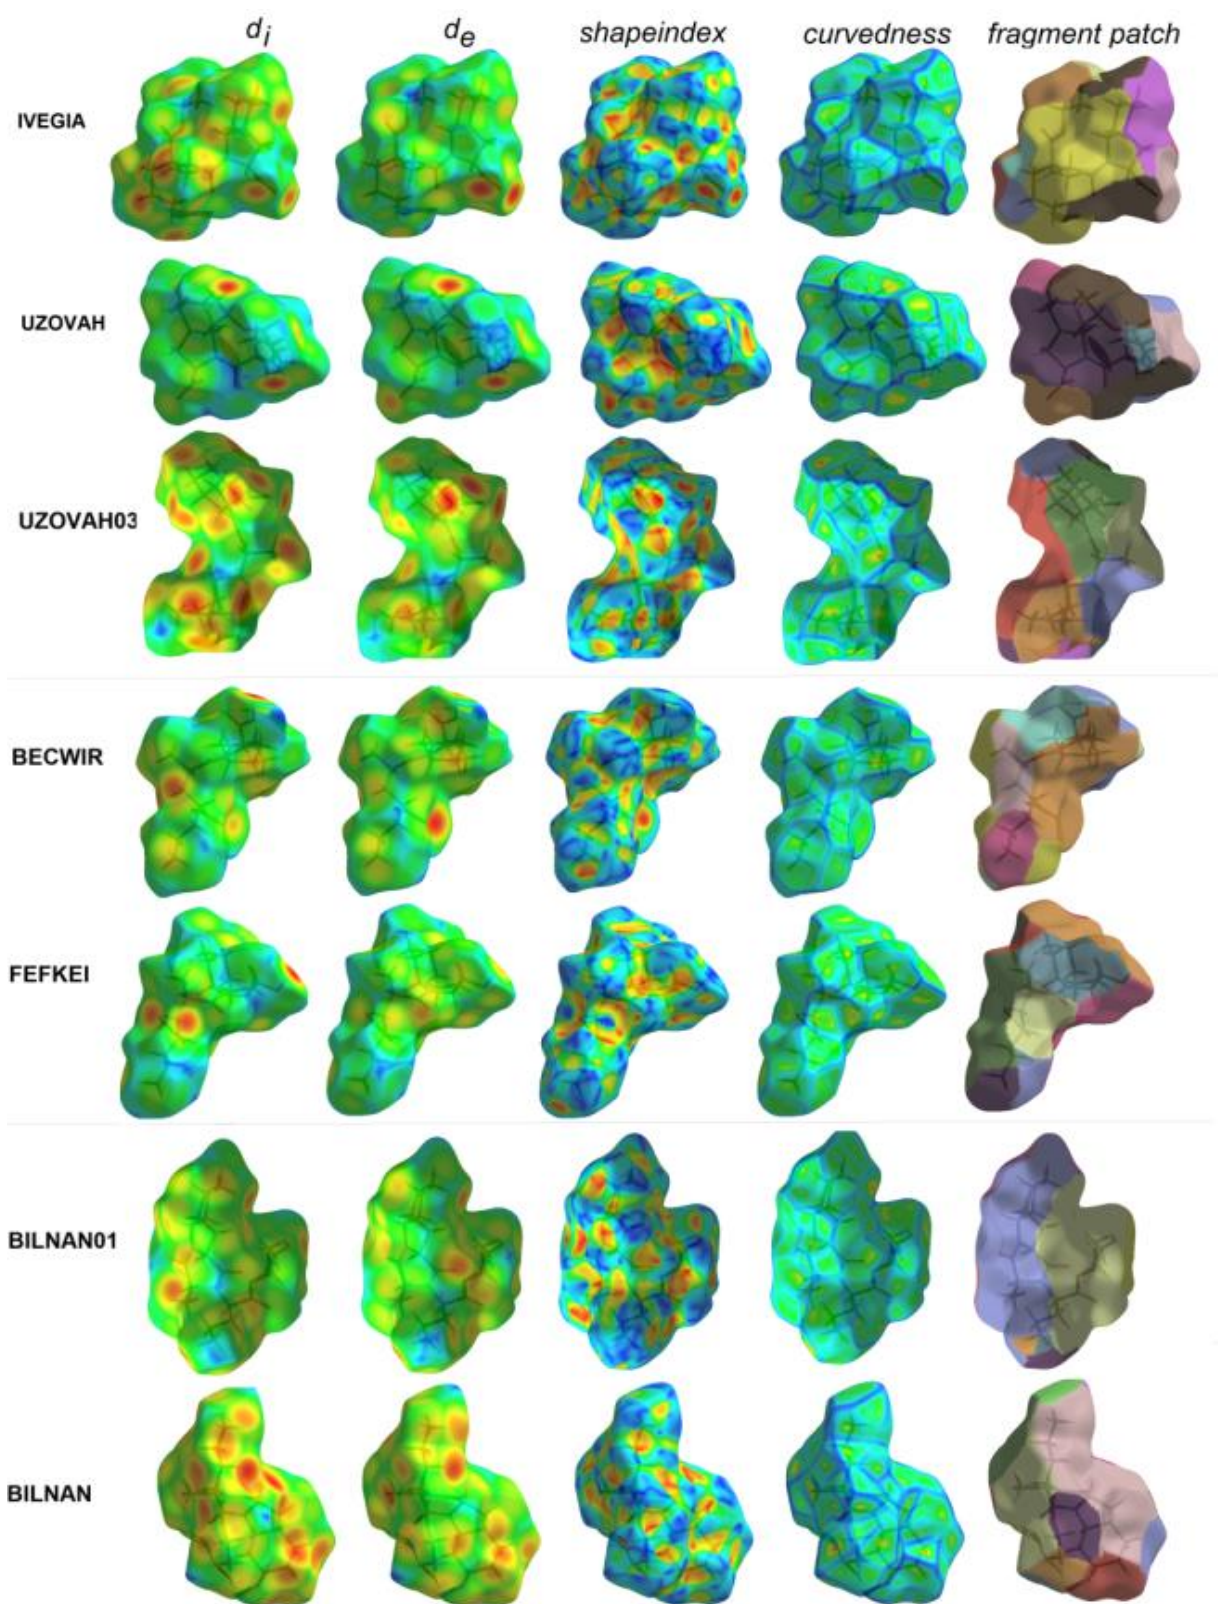

**Figure S8.** View of the 3D Hirshfeld surface of perindopril-derived crystal structures mapped with  $d_i$ ,  $d_e$ , *shapeindex*, *curvedness* and *fragment patch* profiles. The surfaces are shown as transparent to allow visualization of the orientation and conformation of the functional groups.

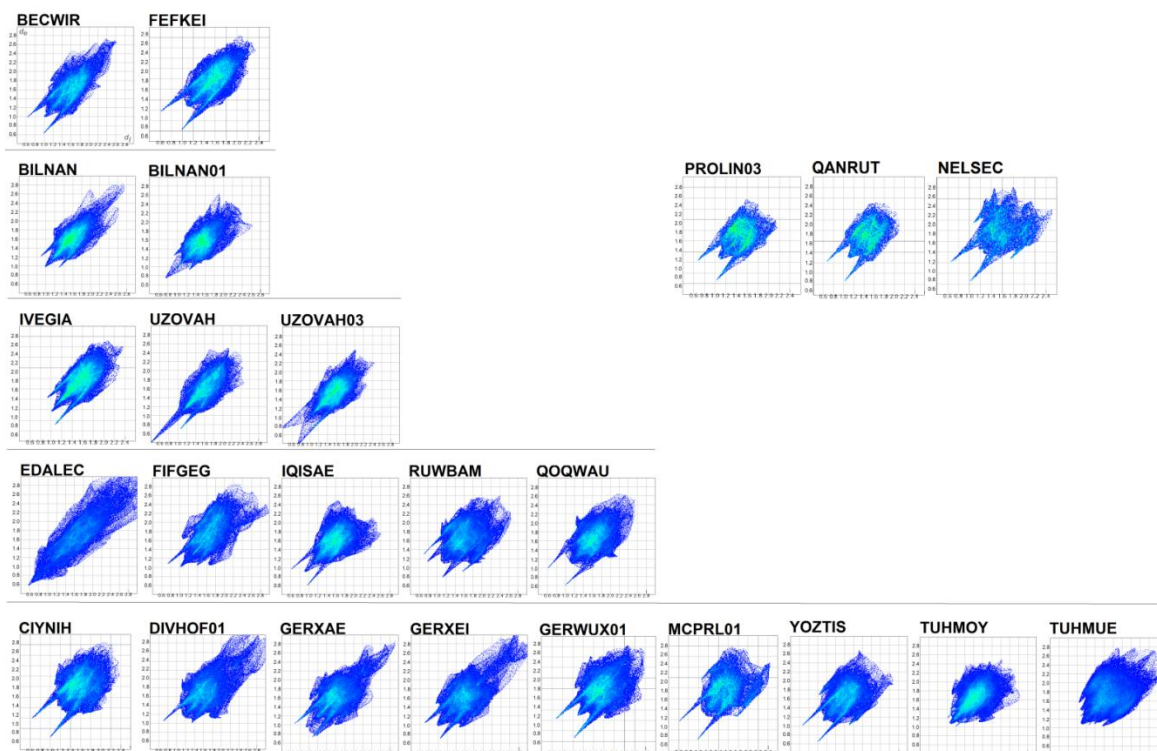

**Figure S9.** Full FPs for all investigated proline-based structures: proline structures (PROLIN03, QANRUT, NELSEC – SPR.), perindoprilat crystals (BECWIR, FEFKEI), DKP perindopril polymorphs (BILNAN, BILNAN01), perindopril structures (IVEGIA, UZOVAH, UZOVAH03), proline-based crystals (EDALEC, FIFGEG, IQISAE, RUWBAM, QQQWAW) and other modified proline-based structures (CIYNIH, DIVHOF01, GERXAE, GERXEI, GERWUX01, MCPRL01, YOZTIS, TUHMOY, TUHMUE).

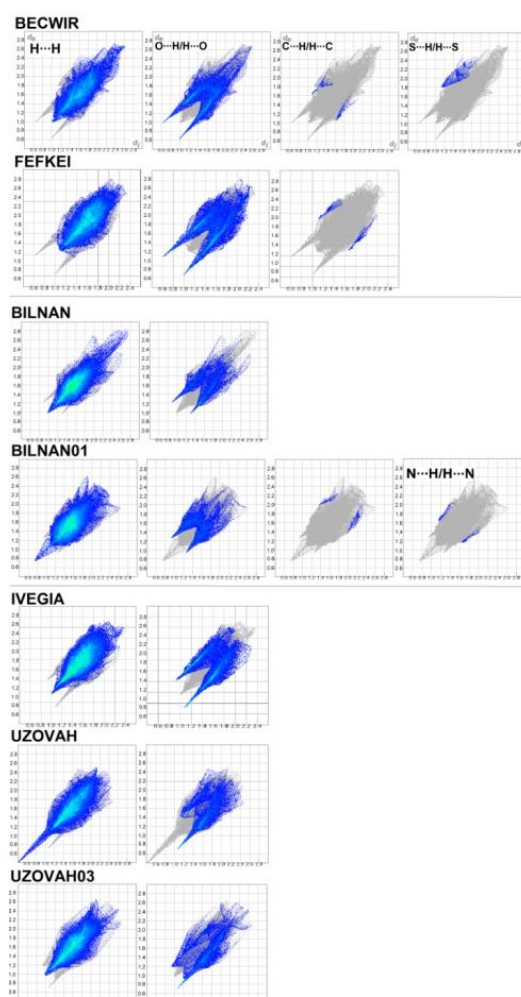



**Figure S10.** FPs for perindopril-derived structures decomposed into the major non-covalent interactions: H $\cdots$ H, O $\cdots$ H/H $\cdots$ O, C $\cdots$ H/H $\cdots$ C and S $\cdots$ H/H $\cdots$ S.

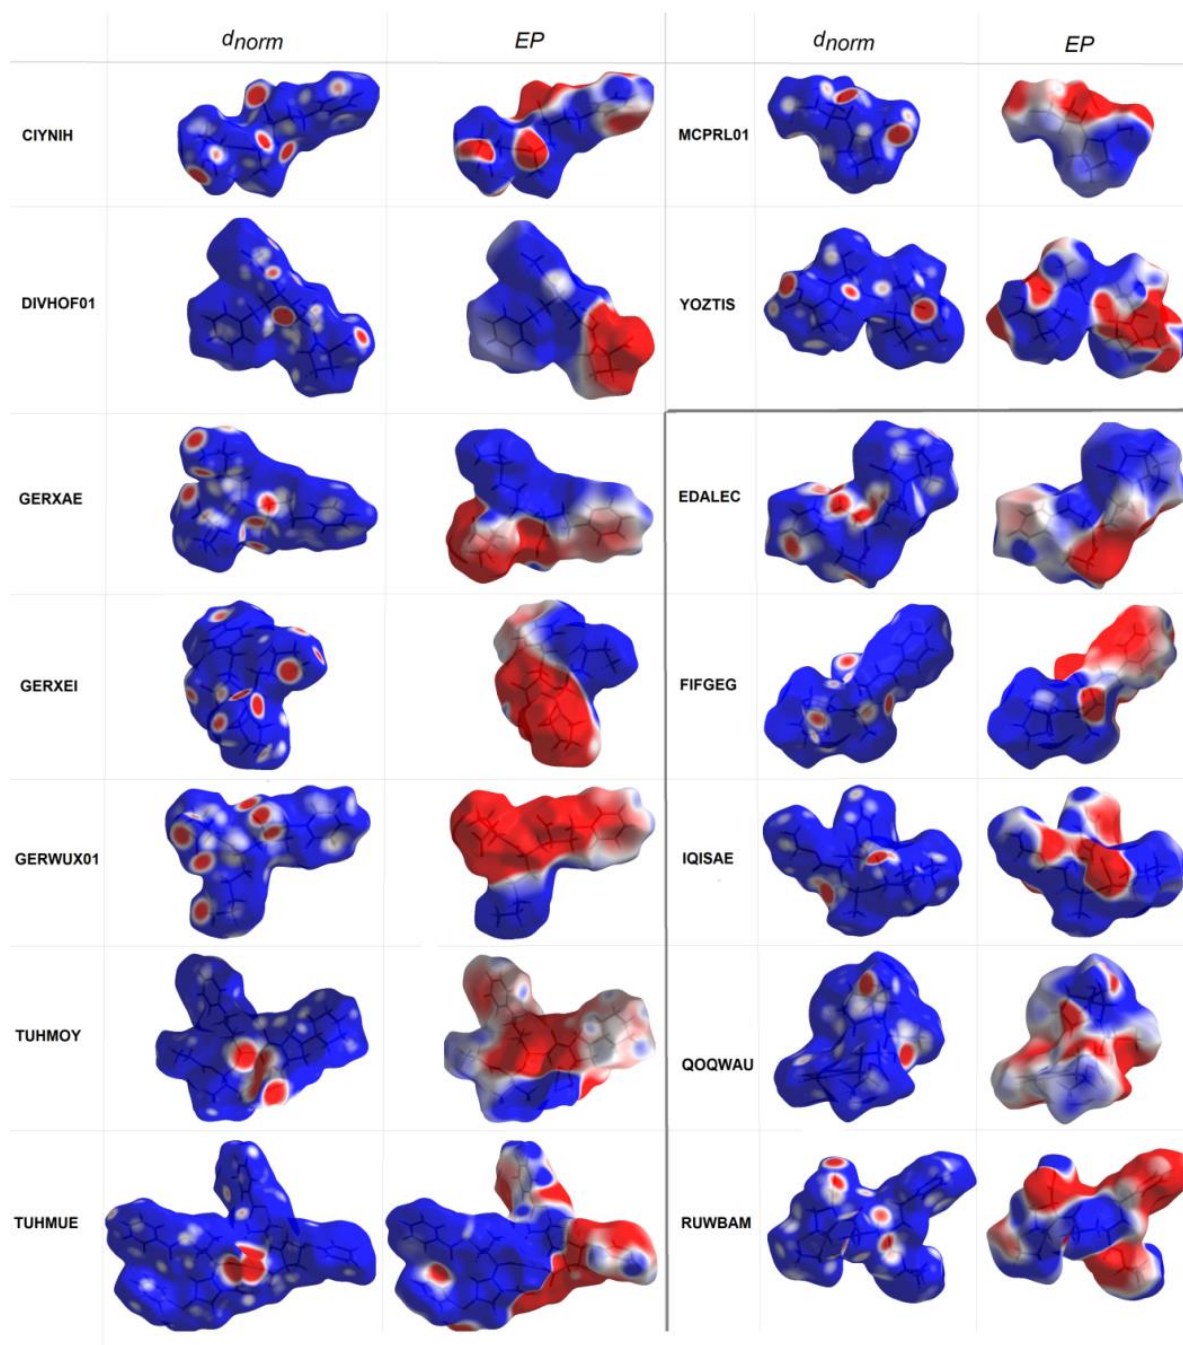

**Figure S11.** HS *d<sub>norm</sub>* and EPs of proline-based (CIYNIH, DIVFOF01, GERXAE, GERXEI, GERWUX01, TUHMOY, TUHMUE) and other modified-proline-based ACEI (EDALEC, FIFGEG, IQISAE, QQQWAW, RUWBAM) crystals, retrieved from the CSD.

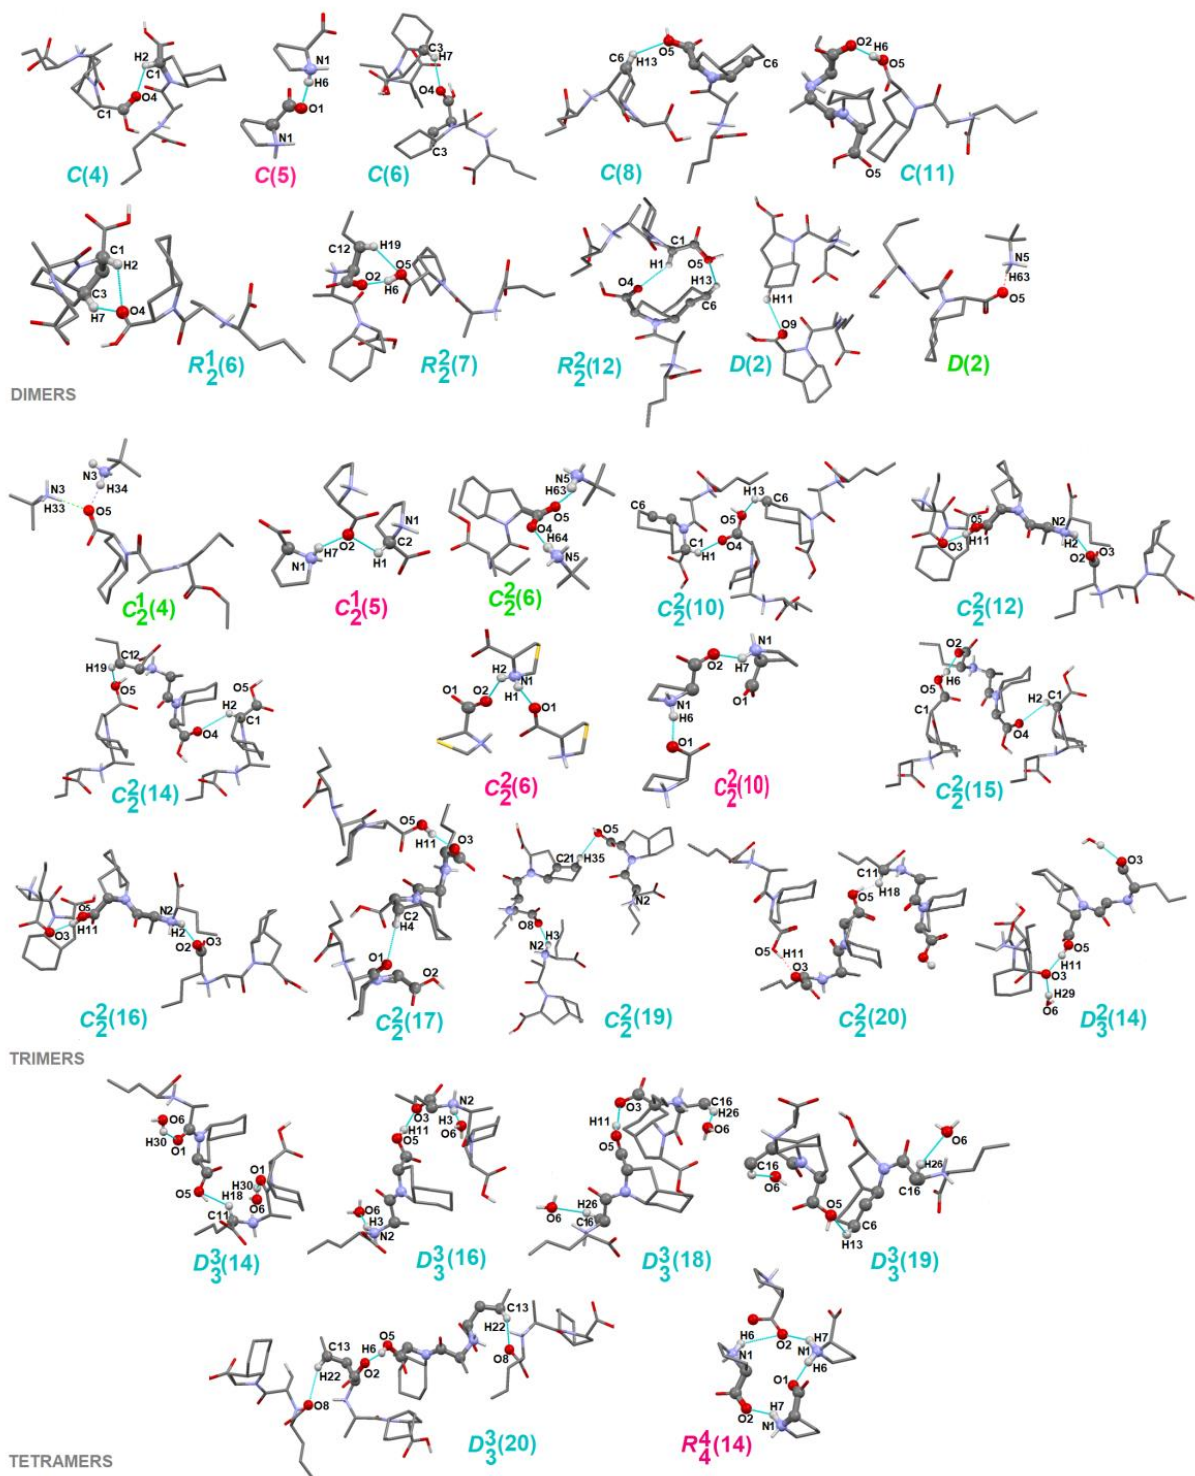

**Figure S12.** Proline-based synthons in perindopril-derived and proline crystal structures (with the graph-set notations), resulting from three types of proline-based tectons (I-marked in blue, II-green and III-pink).

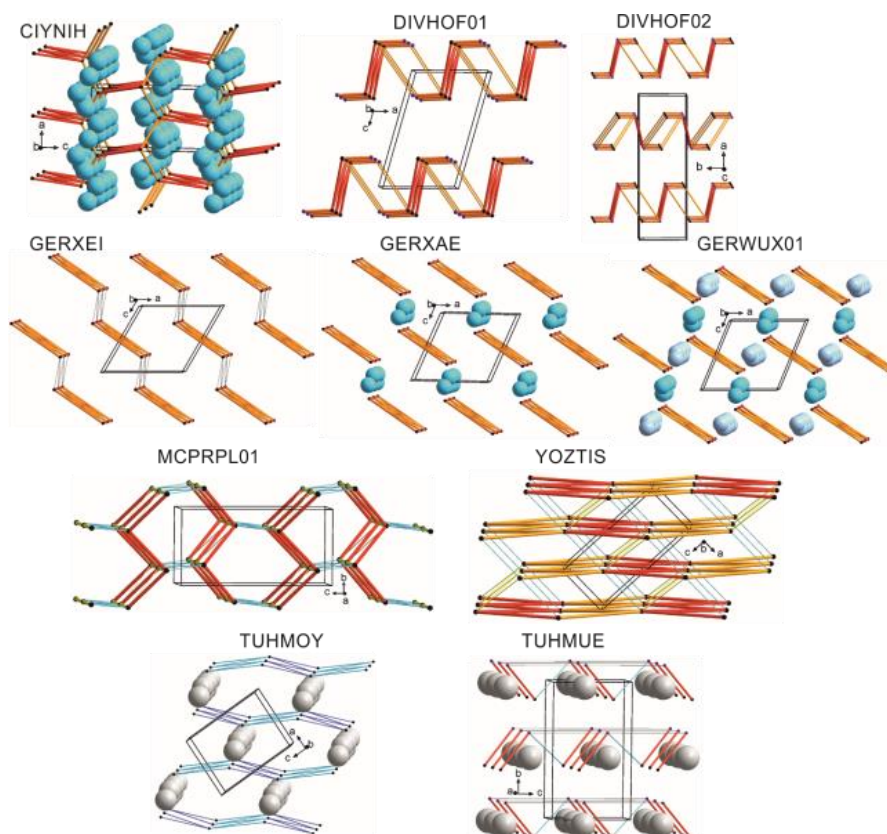

**Figure S13.** Simplified hydrogen-bonded networks showing LSAMs in proline-based ACEI crystals. The black or blue dots represent a center of gravity of the molecule or ion, orange-shaded lines stand for O-H...O or N-H...O hydrogen bonds, blue, grey, and yellow lines for C-H...O, C-H... $\pi$  and C-H...S contacts, respectively. Blue and grey spheres represent the positions of water molecules and sodium cations, respectively.

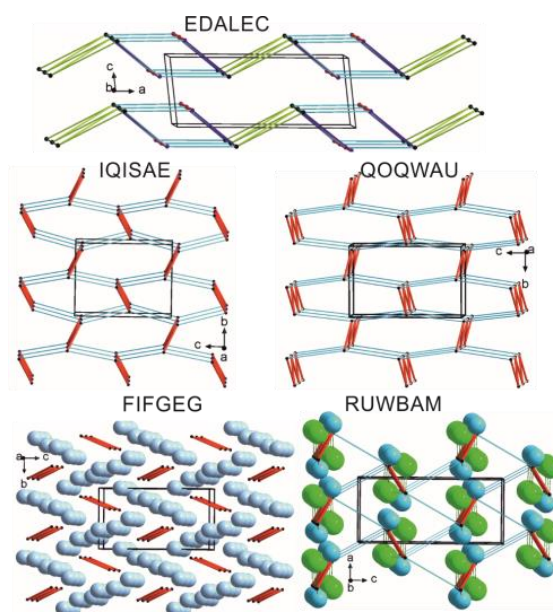

**Figure S14.** Simplified hydrogen-bonded networks in other modified proline-based ACEI structures. The black and blue dots represent a center of gravity of molecules or ions. Red lines stand for O-H...O or N-H...O hydrogen bonds, blue and green lines depict C-H...O contacts and gray lines N-H... $\pi$  contacts. Water molecules or methanol oxygen atoms are represented as blue spheres. Chlorine anions are presented as green spheres.

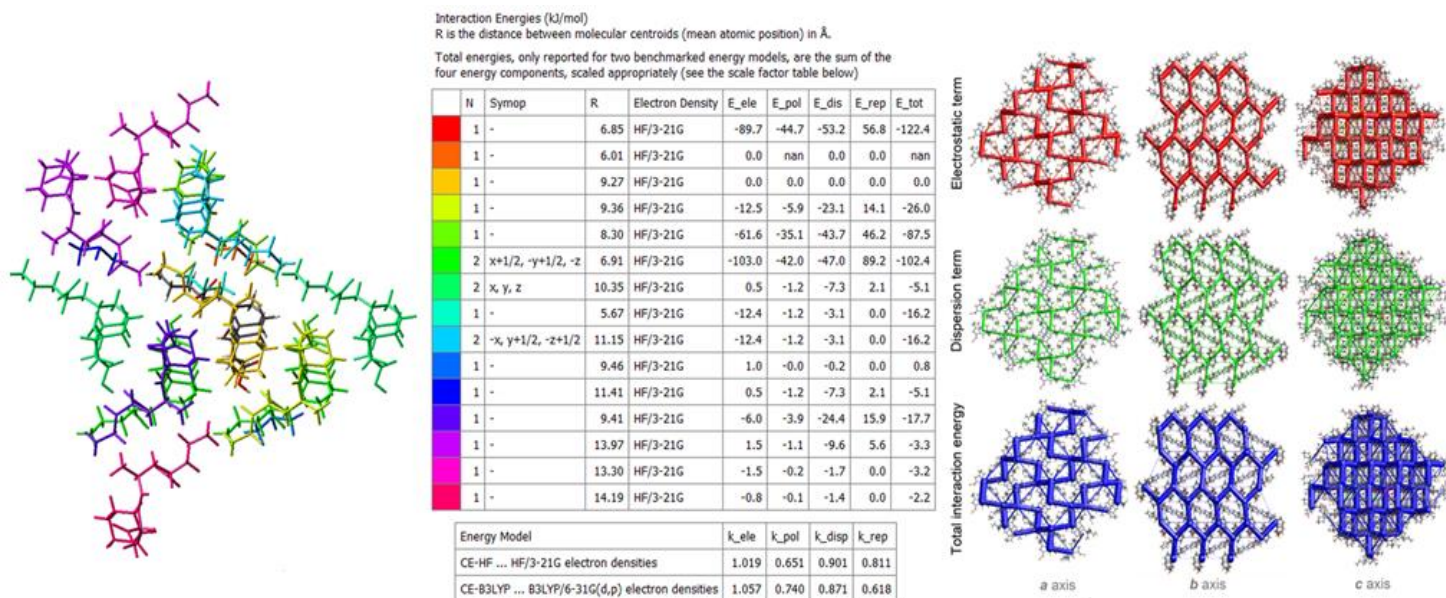

**Figure S15.** On the left: Color coding of neighbouring molecules in perindoprilat structure (BECWIR) in relations to the central molecule (gray). A view along *b*-axis (for interpretation of the references to colour in this figure legend, the readers are referred to the web version of this article). In the middle: Interaction energies of the molecular pairs related to energy frameworks of this perindoprilat structure (Scale factors for benchmarked energy models). On the right: Energy frameworks corresponding to the electrostatic and dispersion energy components, and total energy framework along *a*, *b* and *c*-axis in crystal packing of perindoprilat structure (the tube size: 300).

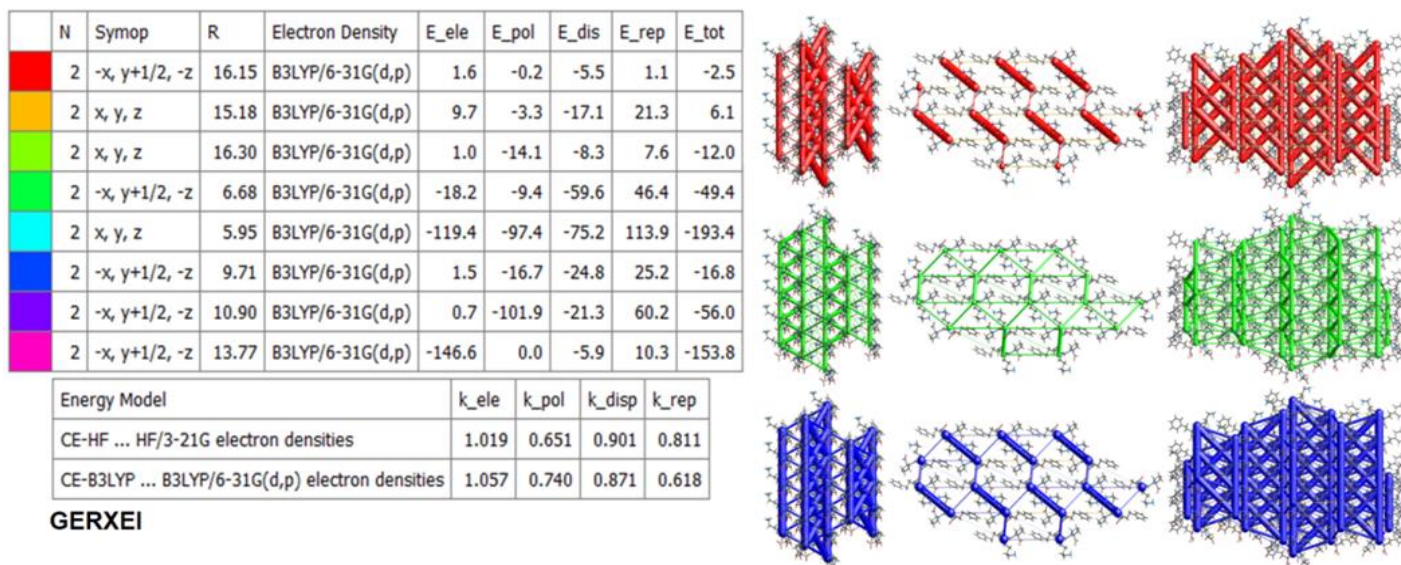

**Figure S16.** Interaction energies of lisinopril (GERXEI) (Scale factors for benchmarked energy models) and energy frameworks corresponding to the electrostatic and dispersion energy components, and total energy framework along *a*, *b* and *c*-axis (the tube size: 300).

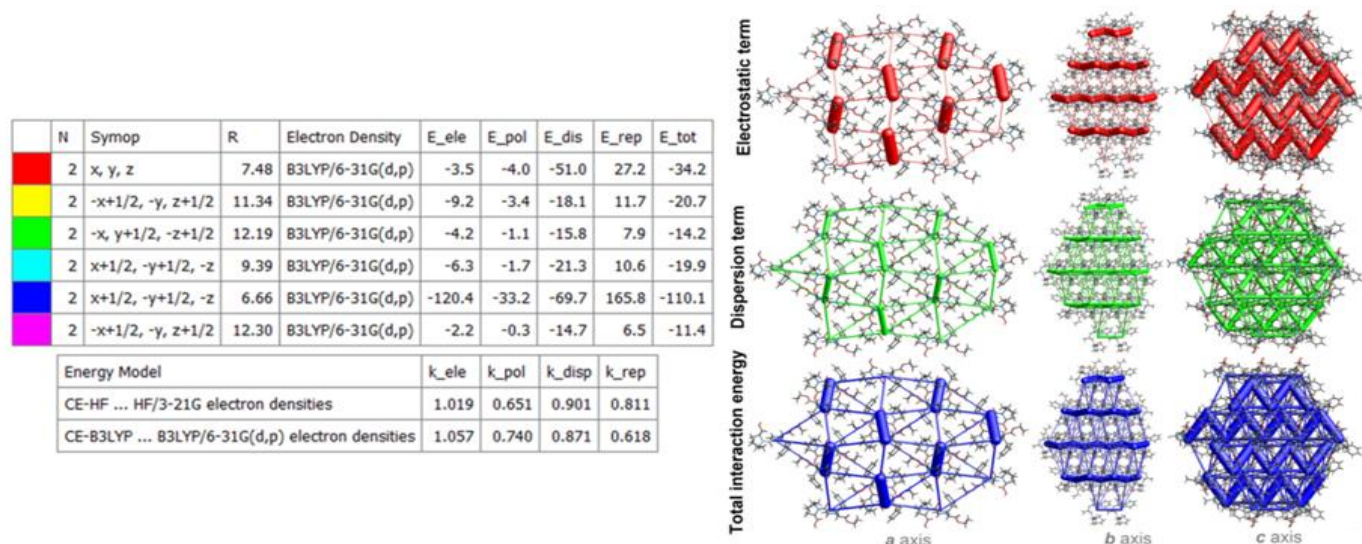

**Figure S17.** Interaction energies of ramipril (QQQWU), (Scale factors for benchmarked energy models) and energy frameworks corresponding to the electrostatic and dispersion energy components, and total energy framework along *a*, *b* and *c*-axis (the tube size: 300).

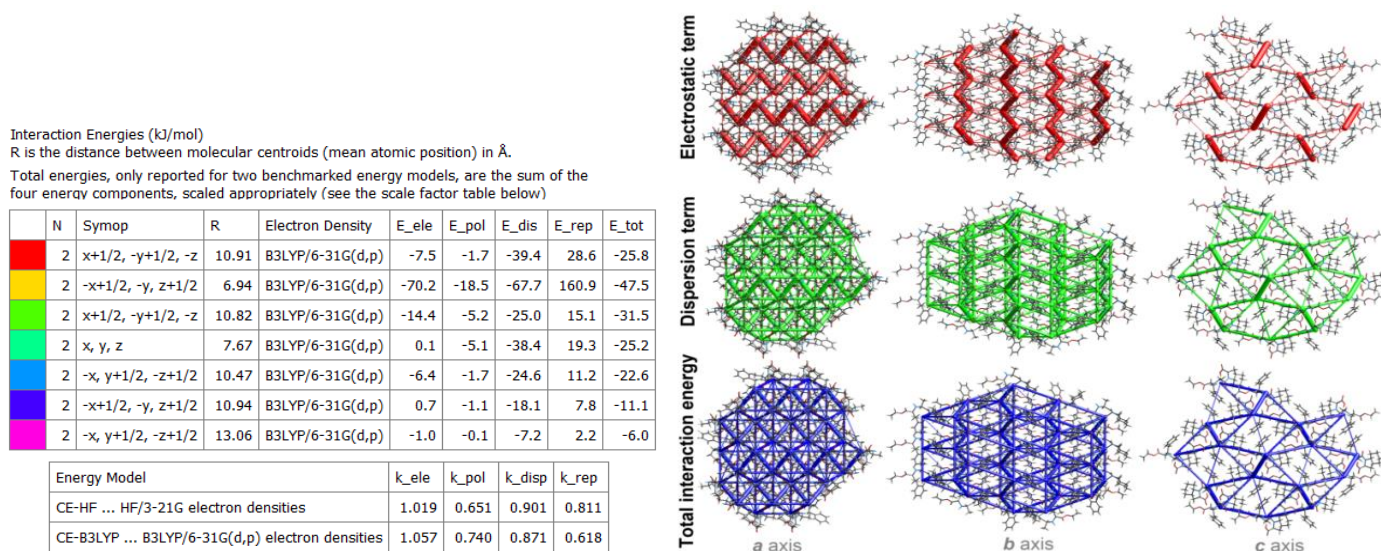

**Figure S18.** Interaction energies of the molecular pairs related to energy frameworks of IQISAE01 (Scale factors for benchmarked energy models) and energy frameworks corresponding to the electrostatic and dispersion energy components, and total energy framework along *a*, *b* and *c*-axis (the tube size: 300).

# TABLES

**Table S1.** Proline-based tectons with relevant structures, retrieved from the CSD.

| CSD code                         | Name                                                                                                                                                          | Formula                                                                              |
|----------------------------------|---------------------------------------------------------------------------------------------------------------------------------------------------------------|--------------------------------------------------------------------------------------|
|                                  | 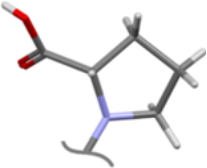 <p style="text-align: center;"><b>N - COOH</b></p>                          |                                                                                      |
| AFIXOE<br>[Rajalakshmi;<br>2013] | <i>N</i> - <i>t</i> -butoxycarbonyl- $\alpha$ -(2-fluorobenzyl)- <i>L</i> -proline<br>C <sub>17</sub> H <sub>22</sub> FNO <sub>4</sub>                        |    |
| AMOLPR<br>[Benedetti; 1979]      | <i>N</i> - <i>t</i> -amyloxycarbonyl- <i>L</i> -proline<br>C <sub>11</sub> H <sub>19</sub> NO <sub>4</sub>                                                    |    |
| ASEYIG<br>[Hursthouse, 2003]     | 1-(5-nitropyridin-2-yl)pyrazolidin-2-carboxylic acid<br>C <sub>10</sub> H <sub>11</sub> N <sub>3</sub> O <sub>4</sub>                                         |   |
| AWAVOK(01)<br>[Huy, 2011]        | 1-( <i>t</i> -butoxycarbonyl)-3-vinylproline<br>C <sub>12</sub> H <sub>19</sub> NO <sub>4</sub>                                                               |  |
| AWAVUQ<br>[Huy, 2011]            | 1-((benzyloxy)carbonyl)-3-isopropylproline<br>C <sub>16</sub> H <sub>21</sub> NO <sub>4</sub>                                                                 |  |
| AXCPRO<br>[Kartha, 1974]         | C <sub>21</sub> H <sub>33</sub> N <sub>3</sub> O <sub>6</sub><br><i>t</i> -amyloxycarbonyl- <i>L</i> -prolyl- <i>L</i> -prolyl- <i>L</i> -proline             |  |
| BECWIR                           | <i>See scheme 1, 2</i>                                                                                                                                        |                                                                                      |
| BEMKIN<br>[Bavoso, 1982]         | C <sub>20</sub> H <sub>31</sub> N <sub>3</sub> O <sub>6</sub><br><i>N</i> - <i>t</i> -butyloxycarbonyl- <i>D</i> -prolyl- <i>D</i> -prolyl- <i>L</i> -proline |  |

|                                 |                                                                                                                                                       |                                                                                                       |
|---------------------------------|-------------------------------------------------------------------------------------------------------------------------------------------------------|-------------------------------------------------------------------------------------------------------|
| BGPLGP [Ueki, 1971]             | $C_{28}H_{38}BrN_5O_8, H_2O, C_4H_8O_2$<br>o-bromobenzyloxycarbonyl-glycyl-L-prolyl-L-leucyl-L-proline ethyl acetate solvate monohydrate              | 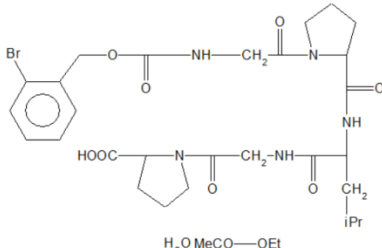<br>$H_2O$ MeCO—OEt |
| BGPLGQ [Bando, 1978]            | $C_{28}H_{39}N_5O_8, 2H_2O$<br>N-benzyloxycarbonyl-glycyl-L-prolyl-L-leucyl-glycyl-L-proline dihydrate                                                | <br>$H_2O$          |
| BIMFUY(10) [Busetti, 1982]      | $C_{16}H_{18}N_2O_4, 0.5H_2O$<br>(Z)-N-acetyldehydrophenylalanyl-L-proline hemihydrate                                                                | <br>$H_2O$          |
| BIRYEG [Martin, 1999]           | $C_{10}H_{15}NO_4$<br>(5R,6S,9S)-9-carboxy-5-hydroxy-5-methyl-1-azabicyclo[4.3.0]nonan-2-one                                                          | <br>COOH           |
| BOCAPR [Nair, 1981]             | $C_{25}H_{29}N_3O_6, H_2O$<br>benzyloxycarbonyl-L-alanyl-D-phenylalanyl-L-proline monohydrate                                                         | <br>$H_2O$        |
| BOCGLP(01,02) [Benedetti, 1976] | $C_{12}H_{20}N_2O_5$<br>t-butyloxycarbonylglycyl-L-proline                                                                                            | <br>$H_2O$        |
| BOCPRO(01) [Kamwaya, 1981]      | $C_{15}H_{24}N_2O_5$<br>t-butyloxycarbonyl-L-prolyl-proline                                                                                           | <br>$H_2O$        |
| BOZBOI [Ranatunga, 2009]        | $C_{13}H_{21}NO_4$<br>1-(t-butyloxycarbonyl)hexahydrocyclopenta[b]pyrrole-6a(1H)-carboxylic acid                                                      | <br>COOH          |
| BUCWUT [Roy, 2014]              | $C_{24}H_{23}ClN_2O_6, CH_4O, H_2O$<br>1-((1-(4-chlorobenzoyl)-5-methoxy-2-methyl-1H-indol-3-yl)acetyl)-4-hydroxyproline methanol solvate monohydrate | <br>HO— $H_2O$    |
| BXALPR(10) [Kamwaya, 1982]      | $C_{13}H_{22}N_2O_5, H_2O$<br>t-butyloxycarbonyl-(l)-alanyl-(L)-proline monohydrate                                                                   | <br>$H_2O$        |

|                                 |                                                                                                                                   |                                                                                      |
|---------------------------------|-----------------------------------------------------------------------------------------------------------------------------------|--------------------------------------------------------------------------------------|
| BXCGPL [Kojima, 1978]           | $C_{15}H_{18}N_2O_5$<br>benzyloxycarbonylglycyl- <i>D,L</i> -proline                                                              | 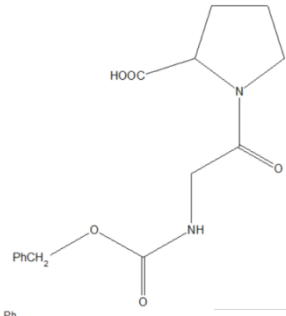   |
| BXCGPR [Meesakul, 2020]         | $C_{13}H_{10}O_2$<br>6-(2-phenylethenyl)-2H-pyran-2-one                                                                           |    |
| BXGLPR [Tanaka, 1977]           | $C_{15}H_{18}N_2O_5$<br>benzyloxycarbonylglycyl- <i>L</i> -proline                                                                |   |
| BXPROL(01,02) [Benedetti, 1974] | $C_{10}H_{17}NO_4$<br><i>N</i> -( <i>t</i> -butyloxycarbonyl)- <i>L</i> -proline                                                  |  |
| BZCPRO(01,11) [Galitskii, 1977] | $C_{18}H_{22}N_2O_5$<br><i>N</i> -benzyloxycarbonyl- <i>L</i> -prolyl- <i>L</i> -proline                                          |  |
| CAHDIA [Carreras, 2011]         | $C_{10}H_{12}BrNO_5, H_2O$<br>4-bromo-6-oxotetrahydro-3H,8H-pyrano[3,4-d]pyrrolo[1,2-c][1,3]oxazolo-8-carboxylic acid monohydrate |  |
| CALFIE [Smith, 1981]            | $C_{20}H_{35}N_3O_6, H_2O$<br><i>t</i> -butoxycarbonyl-leucyl- $\alpha$ -aminoisobutyryl-proline monohydrate                      |  |
| CIDJIJ(01) [Seijas, 2007]       | $C_6H_{10}N_2O_3$<br>( <i>2S</i> )-1-carbamoylpyrrolidine-2-carboxylic acid ( <i>N</i> -carbamoyl- <i>L</i> -proline)             |  |
| CIYNIH                          | See scheme 1, 2                                                                                                                   |                                                                                      |



|                                      |                                                                                                                                                                                                           |                                                                                      |
|--------------------------------------|-----------------------------------------------------------------------------------------------------------------------------------------------------------------------------------------------------------|--------------------------------------------------------------------------------------|
| <p>COSLAA<br/>[Wojnarska, 2019]</p>  | <p><math>C_{12}H_{15}NO_4S</math>, <math>0.5C_6H_6</math><br/>(2<i>S</i>)-1-(4-methylphenyl)sulfonylpyrrolidine-2-carboxylic acid benzene solvate [<i>N</i>-p-tosyl-<i>L</i>-proline benzene solvate]</p> |     |
| <p>COVMOP<br/>[Colapietro, 1985]</p> | <p><math>C_{25}H_{38}N_4O_7</math><br/><i>t</i>-butoxycarbonyl-<i>L</i>-prolyl-<i>D</i>-prolyl-<i>L</i>-prolyl-<i>D</i>-proline</p>                                                                       |    |
| <p>COWHEC<br/>[Iminov, 2008]</p>     | <p><math>C_{18}H_{14}N_2O_4</math>, <math>H_2O</math><br/>2,3,4,5-tetrahydro-1,5-dioxo-4-phenylpyrrolo[1,2-a]quinazoline-3a(1<i>H</i>)-carboxylic acid monohydrate</p>                                    |    |
| <p>CURFEB<br/>[Hanessian, 2009]</p>  | <p><math>C_{33}H_{43}NO_9</math><br/>6-((3,5-bis(benzyloxy)-4-hydroxytetrahydro-2<i>H</i>-pyran-2-yl)oxy)-1-(<i>t</i>-butoxycarbonyl)octahydro-1<i>H</i>-indole-2-carboxylic acid.</p>                    |   |
| <p>DASQEU<br/>[Duggan, 2005]</p>     | <p><math>C_{10}H_{15}N_2O_3^+</math>, <math>Cl^-</math><br/>(2<i>S</i>,5<i>R</i>,9<i>S</i>)-6-amino-5-oxo-2,3,5,6,9,9a-hexahydro-1<i>H</i>-pyrrolo[1,2-<i>a</i>]azepine-3-carboxylate hydrochloride</p>   |  |
| <p>DAVHUF<br/>[Delgado, 2012]</p>    | <p><math>C_6H_{10}N_2O_3</math><br/><i>R,S</i>-1-carbamoylpyrrolidine-2-carboxylic acid [<i>N</i>-carbamoyl-<i>D,L</i>-proline]</p>                                                                       |  |
| <p>DIVHOF(01,02)</p>                 | <p>See scheme 1, 2</p>                                                                                                                                                                                    |                                                                                      |
| <p>EGUWEL<br/>[Bendzinska, 2019]</p> | <p><math>C_{25}H_{23}NO_3</math><br/><i>N</i>-(triphenylacetyl)-<i>L</i>-proline</p>                                                                                                                      |  |

|                          |                                                                                                                                                            |                                                                                      |
|--------------------------|------------------------------------------------------------------------------------------------------------------------------------------------------------|--------------------------------------------------------------------------------------|
| EJIHAG [Doi, 2002]       | $C_{10}H_{16}FNO_4$<br><i>N</i> - <i>t</i> -butoxycarbonyl-4-( <i>S</i> )-fluoroproline                                                                    | 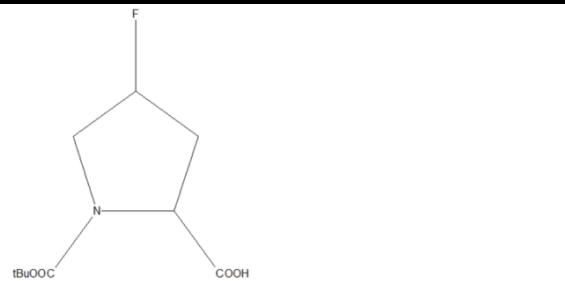    |
| ELOBOW [Hanesian, 2003]  | $C_9H_{13}NO_4S$<br>(8 <i>S</i> )-1,1-dioxo-2,3,5q,6,7,8-octahydro-1 <i>H</i> -1λ6-pyrrolo(1,2- <i>b</i> )(1,2)thiazepine-8-carboxylic acid                |    |
| EMITIE [Shoulders, 2010] | $C_{10}H_{19}NO_5$<br>(2 <i>S</i> ,4 <i>S</i> )-1-( <i>t</i> -butoxycarbonyl)-4-methoxyproline                                                             |    |
| EMOBUE [Bhuyan, 2011]    | $C_{18}H_{28}N_2O_6Se_2$<br>1,1'-(diselane-1,2-diylbis(2-methyl-1-oxopropane-3,1-diyl))-bis(pyrrolidine-2-carboxylic acid)                                 |    |
| EPUWAP [Kolstoe, 2014]   | $C_{16}H_{24}N_2O_6, H_2O$<br>1,1'-(1,6-dioxohexane-1,6-diyl)dipyrrolidine-2-carboxylic acid monohydrate                                                   |   |
| EVOPOU [Messeakul, 2020] | $C_{13}H_{10}O_2$<br>6-(2-phenylethenyl)-2 <i>H</i> -pyran-2-one [( <i>E</i> )-6-styrylpyran-2-one]                                                        |  |
| EZEYOX(01) [Hua, 2002]   | $C_{12}H_{12}N_2O_2, 2(H_2O)$<br>1,2,3,9-tetrahydropyrrolo(2,1- <i>b</i> )quinazolin-1-carboxylic acid dihydrate [(-)-linarinic acid dihydrate]            |  |
| FAMVUM [Luparia, 2011]   | $C_{21}H_{15}BrN_2O_6$<br>(1 <i>R</i> ,2 <i>S</i> ,5 <i>S</i> )-2-(4-bromobenzyl)-3-(4-nitrobenzoyl)-4-oxo-3-azabicyclo[3.2.0]hept-6-ene-2-carboxylic acid |  |

|                           |                                                                                                                                  |                                                                                      |
|---------------------------|----------------------------------------------------------------------------------------------------------------------------------|--------------------------------------------------------------------------------------|
| FEFKEI                    | See scheme 1, 2                                                                                                                  |                                                                                      |
| FEYMOM [Zhang, 2004]      | $C_{11}H_{13}NO_5, H_2O$<br>3-thoxy-4-((2`S)-2`-carboxypyrrolidin-1-yl)-3-cyclobutane-1,2-dione monohydrate                      | 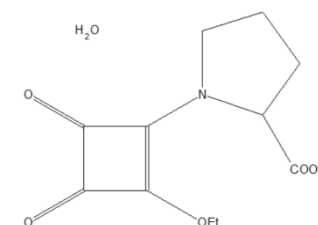   |
| FEZNON [Blankley, 1987]   | $C_{16}H_{18}BrNO_3$<br>(2 $\alpha$ ,3 $\alpha\beta$ , 7 $\alpha\beta$ )-1-(3-bromobenzoyl)octahydro-1H-indole-2-carboxylic acid |    |
| FIFGEG                    | See scheme 1, 2                                                                                                                  |                                                                                      |
| FIZXAN [Wu, 1987]         | $C_{17}H_{21}N_3O_6$<br>N-benzyloxycarbonyl-glycyl-glycyl-L-proline                                                              |   |
| GABNUV [Forbes, 2016]     | $C_{16}H_{20}INO_5$<br>1-(t-butoxycarbonyl)-4-(4-iodophenoxy)proline                                                             |  |
| GABPAD [Forbes, 2016]     | $C_{26}H_{22}INO_5, CH_4O$<br>1-((9H-fluoren-9-ylmethoxy)carbonyl)-4-(4-iodophenoxy)proline methanol solvate                     |  |
| GESKEU [Colapietro, 1986] | $C_{25}H_{38}N_4O_7$<br>t-butoxycarbonyl-D-prolyl-L-prolyl-D-prolyl-L-proline                                                    |  |
| GIWROU [Vamos, 2007]      | $C_{17}H_{21}NO_5$<br>syn-3a-hydroxy-1-(4-methoxybenzyl)-2-oxo-octahydro-7aH-indole-7a-carboxylic acid                           |  |

|                              |                                                                                                                                                                                        |                                                                                      |
|------------------------------|----------------------------------------------------------------------------------------------------------------------------------------------------------------------------------------|--------------------------------------------------------------------------------------|
| GIXLAC [Kale, 2014]          | $C_{30}H_{38}N_8O_9S_2$<br>1-((2-((2-azido-2-methylpropanoyl)amino)phenyl)sulfonyl)prolyl-N-(2-((2-carboxypyrrolidin-1-yl)sulfonyl)phenyl)-2-methylalaninamide                         | 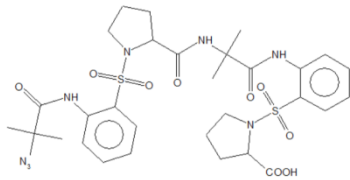   |
| GLHPRC [Garbay, 1980]        | $C_{12}H_{18}N_2O_5$<br><i>N</i> -acetyl- <i>L</i> -prolyl- <i>L</i> -4-hydroxyproline                                                                                                 |    |
| GOYGOT [Li, 2019]            | $C_{13}H_{15}NO_3$<br>1-(phenylacetyl)proline                                                                                                                                          |    |
| HATWOO [Dijnovic, 1994]      | $C_{21}H_{23}N_5O_4, H_2O$<br><i>N</i> -(( <i>Z</i> )-2-benzylamino-3-(4,6-dimethyl-2-pyrimidinylamino)propenoyl)- <i>L</i> -proline monohydrate                                       |   |
| ICOQIB [Vartak, 2006]        | $C_{20}H_{34}N_2O_4$<br>(2 <i>R</i> ,5 <i>R</i> ,1' <i>R</i> )-2- <i>t</i> -butyl-5-(2',2'-dimethyl-1-(2 <i>S</i> -carboxy-1-pyrrolidinyl)propyl)-1-aza-3-oxabicyclo(3.3.0)octan-4-one |  |
| IQISAE(01,02)                | See scheme 1, 2                                                                                                                                                                        |                                                                                      |
| JAWLIC [Panneerselvam, 1990] | $C_{16}H_{20}N_2O_5$<br>benzyloxycarbonyl- <i>L</i> -alanyl- <i>L</i> -proline                                                                                                         |  |
| JEGXOI [Viostat, 1990]       | $C_{14}H_{24}Cl_2N_2O_8Pt_2S_2, 3H_2O$<br>bis((μ2-5-oxo-prolinato- <i>N</i> , <i>O</i> )-chloro-(dimethylsulfoxide- <i>S</i> )-platinum(ii) trihydrate                                 |  |
| JEKPIY [Hausin, 1990]        | $C_{24}H_{26}N_2O_5$<br>(5 <i>S</i> )-5-benzamido-4-oxo-6-phenylhexanoyl- <i>L</i> -proline [Ketoace]                                                                                  |  |
| JEKPOE [Hausin, 1990]        | $C_{18}H_{21}NO_4S$<br>(1 <i>S</i> ,2 <i>R</i> )-1-((2-(benzoylthio)cyclopentyl)carbonyl)- <i>L</i> -proline                                                                           |  |

|                                     |                                                                                                                                                                                                     |                                                                                      |
|-------------------------------------|-----------------------------------------------------------------------------------------------------------------------------------------------------------------------------------------------------|--------------------------------------------------------------------------------------|
| <p>JUJLUL<br/>[Meesakul, 2020]</p>  | <p><math>C_{13}H_{10}O_2</math><br/>6-(2-phenylethenyl)-2H-pyran-2-one [(E)-6-styrylpyran-2-one]</p>                                                                                                | 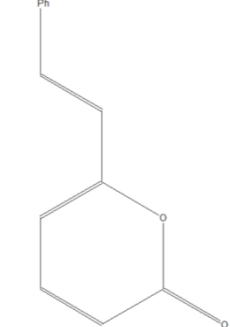   |
| <p>KENYEI<br/>[Matsumura, 2006]</p> | <p><math>C_{18}H_{25}NO_3</math><br/>Trans-N-formyl-<math>\alpha</math>'-(2,4,6-triethylphenyl)-L-proline</p>                                                                                       |    |
| <p>KETSEJ<br/>[Stoykova, 2013]</p>  | <p><math>C_{28}H_{38}N_4O_8</math>, <math>C_2H_6OS</math><br/>6-(2-phenylethenyl)-2H-pyran-2-one</p>                                                                                                |    |
| <p>KOKRIL [Kemp, 1991]</p>          | <p><math>C_{13}H_{18}N_2O_4S</math><br/>(1S,4S,7S,10S)-12-acetyl-4-carboxy-3,12-diaza-2-oxo-9-thiatricyclo(8.2.1.0<sup>3,7</sup>)tridecane</p>                                                      |   |
| <p>KULROB [Aubry, 1991]</p>         | <p><math>C_7H_{12}N_2O_4</math><br/>1-[(methoxycarbonyl)amino]proline</p>                                                                                                                           |  |
| <p>KUSTIB [Finke, 1992]</p>         | <p><math>C_{16}H_{20}N_2O_9S</math><br/>3-(acetoxymethyl)-2-((2(S)-carboxypyrrolidino)carbonyl)-7<math>\alpha</math>-methoxy-8-oxo-5-thia-1-azabicyclo(4.2.0)oct-2-one 5,5-dioxide [L-658, 758]</p> |  |
| <p>LAFDUU<br/>[Naveen, 2016]</p>    | <p><math>C_{20}H_{20}N_3O_5^+</math>, <math>H_2O</math>, <math>Cl^-</math><br/>1-((3-carboxy-9H-b-carbolin-2-ium-1-yl)acetyl)proline chloride monohydrate</p>                                       |  |
| <p>LAWJOI [Milne, 1993]</p>         | <p><math>C_{24}H_{33}N_3O_6</math><br/>N-t-Butoxycarbonyl-prolyl-phenylalanyl-proline</p>                                                                                                           |  |

|                                |                                                                                                                                                                                                        |                                                                                      |
|--------------------------------|--------------------------------------------------------------------------------------------------------------------------------------------------------------------------------------------------------|--------------------------------------------------------------------------------------|
| LEPSOP(01)<br>[Odame, 2015]    | C <sub>13</sub> H <sub>14</sub> N <sub>2</sub> O <sub>3</sub> S, H <sub>2</sub> O<br>1-(benzoylcarbamothioyl)pyrrolidine-2-carboxylic acid monohydrate { 1-(benzoylcarbamothioyl)proline monohydrate } | 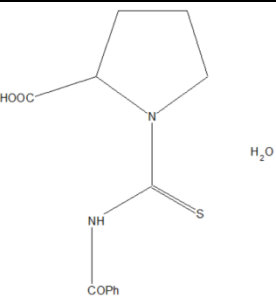    |
| LIKMUP<br>[Rajalakshmi, 2013]  | C <sub>7</sub> H <sub>11</sub> NO <sub>3</sub> , H <sub>2</sub> O<br>1-acetyl-2-pyrrolidine carboxylic acid monohydrate { <i>N</i> -acetyl- <i>L</i> -proline monohydrate }                            |    |
| LIZCED [Krasnov, 2008]         | C <sub>18</sub> H <sub>18</sub> N <sub>2</sub> O <sub>5</sub> S<br>(2 <i>S</i> ,4 <i>S</i> )-4-((4-Methylbenzenesulfonyl)amino)-5-oxo-1-phenylproline                                                  |    |
| LIZCUT [Krasnov, 2008]         | C <sub>19</sub> H <sub>14</sub> N <sub>2</sub> O <sub>5</sub> , CH <sub>4</sub> O<br>(2 <i>S</i> ,4 <i>S</i> )-5-oxo-1-phenyl-4-phthalimidoproline methanol solvate                                    |   |
| LODTIH(01)<br>[Xinghua, 2014]  | C <sub>11</sub> H <sub>17</sub> NO <sub>4</sub><br>2-( <i>t</i> -butoxycarbonyl)-2-azabicyclo[3.1.0]hexane-3-carboxylic acid                                                                           |  |
| LODTON<br>[Hanssian, 1997]     | C <sub>11</sub> H <sub>17</sub> NO <sub>4</sub><br><i>cis</i> -(4 <i>S</i> ,5 <i>S</i> )-methano- <i>N</i> - <i>t</i> -butoxycarbonylproline                                                           |  |
| LUZWEK<br>[Chandrarekha, 2016] | C <sub>20</sub> H <sub>19</sub> NO <sub>4</sub> , H <sub>2</sub> O<br>1-((9 <i>H</i> -fluoren-9-ylmethoxy)carbonyl)proline monohydrate                                                                 |  |
| MAMROH<br>[Abdaoui, 2000]      | C <sub>7</sub> H <sub>12</sub> ClN <sub>3</sub> O <sub>5</sub> S<br><i>N</i> -( <i>N</i> '-nitroso- <i>N</i> '-(2-chloroethyl)sulfamoyl)proline                                                        |  |

|                         |                                                                                                                                              |                                                                                      |
|-------------------------|----------------------------------------------------------------------------------------------------------------------------------------------|--------------------------------------------------------------------------------------|
| MAYYOB [Basak, 2005]    | $C_{21}H_{20}N_2O_4, H_2O$<br>5-oxo-1-(2-oxo-1,4( <i>S</i> )-diphenylazetid-3( <i>R</i> )-ylmethyl)pyrrolidine-2-carboxylic acid monohydrate | 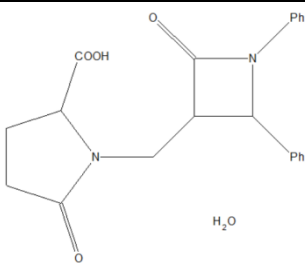    |
| MCPRPL(01)              | <i>See scheme 1, 2</i>                                                                                                                       |                                                                                      |
| MOGQOO [Del Vale, 2002] | $C_{11}H_{16}F_3NO_4$<br><i>N</i> -( <i>t</i> -Butoxycarbonyl)-(4 <i>S</i> )-trifluoromethyl- <i>L</i> -proline                              |    |
| MOLNEG [Bernardi, 2002] | $C_{15}H_{20}N_2O_7$<br><i>t</i> -butoxycarbonyl- <i>L</i> -pyroglutamato- <i>L</i> -pyroglutamic acid                                       |    |
| MPRPRO [Eckle, 1978]    | $C_{11}H_{18}N_2O_3, H_2O$<br><i>N</i> -Methylprolyl-proline monohydrate                                                                     |   |
| MYPYCA [Baert, 1975]    | $C_{11}H_{14}N_2O_6$<br><i>D,L</i> -Methylene-bis( <i>N</i> -pyrrolid-2-one-5-carboxylic acid)                                               |  |
| NAHYPL [Hospital, 1979] | $C_7H_{11}NO_4, H_2O$<br><i>N</i> -Acetyl-4-hydroxy- <i>L</i> -proline monohydrate                                                           |  |
| NAMYIJ [Milne, 1997]    | $C_{19}H_{26}N_2O_6, 2(H_2O)$<br><i>t</i> -butyloxycarbonyl-tyrosyl-proline dihydrate                                                        |  |
| NAMYOP [Milne, 1997]    | $C_{19}H_{26}N_2O_5, 0.7(Na^+), 0.7(Cl^-)$<br><i>t</i> -Butyloxycarbonyl-phenylalanyl-proline sodium chloride                                |  |

|                          |                                                                                                                                                                                                      |                                                                                      |
|--------------------------|------------------------------------------------------------------------------------------------------------------------------------------------------------------------------------------------------|--------------------------------------------------------------------------------------|
| NERNII [Fonari, 2006]    | $C_5H_8N_2O_4$<br>(4 <i>R</i> )-4-Hydroxy-1-nitroso- <i>L</i> -pyrrolidine-2-carboxylic acid                                                                                                         | 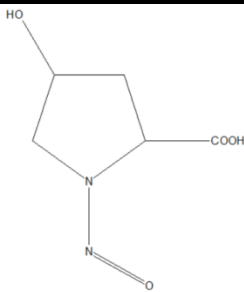    |
| NODZOW [Dai, 2008]       | $C_{28}H_{26}N_2O_5$<br>1-benzyl-5-oxo-4-(phenylamino)-3-((3-phenylprop-2-en-1-yl)oxy)carbonyl)proline                                                                                               |    |
| NPRPLN [Kamwaya, 1981]   | $C_8H_{13}NO_3$<br><i>N</i> -Propionyl-proline                                                                                                                                                       |    |
| NUKSES [De Poli, 2009]   | $C_{14}H_{17}NO_4$<br>1-((benzyloxy)carbonyl)-2-methylproline                                                                                                                                        |   |
| OZUQEH [Kubyskin, 2012]  | $C_{11}H_{15}F_2NO_4$<br>2-( <i>t</i> -butoxycarbonyl)-6,6-difluoro-2-azabicyclo[3.1.0]hexane-3-carboxylic acid                                                                                      |  |
| PABSOB [Cheng, 2002]     | $C_{18}H_{20}Cl_2N_2O_5$<br>(5 <i>R</i> ,8 <i>S</i> )-3-(2,6-Dichlorophenyl)-1-oxa-2,7-diazaspiro[4,4]non-2-ene-7-butoxycarbonyl-8-carboxylic acid                                                   |  |
| PABSUH [Cheng, 2002]     | $C_{29}H_{26}N_2O_6$<br>(5 <i>S</i> ,8 <i>S</i> )-3-(2-Methoxyphenyl)-1-oxa-2,7-diazaspiro[4,4]non-2-ene-7-(fluorene-9-methoxycarbonyl)-8-carboxylic acid                                            |  |
| PABTAO [Cheng, 2002]     | $C_{19}H_{24}N_2O_6, CH_4O$<br>(5 <i>S</i> ,8 <i>S</i> )-3-(4-methoxyphenyl)-1-oxa-2,7-diazaspiro[4,4]non-2-ene-7-( <i>t</i> -butoxycarbonyl)-8-carboxylic acid methanol solvate                     |  |
| PACWUL [Wasserman, 1992] | $C_{13}H_{20}N_2O_5, 0.5(CH_4O), 0.5(H_2O)$<br>7-(1-Hydroxyethyl)-1-hydroxy-6-methyl-9a-carboxy-8-oxoazetidino(1,2- <i>c</i> )perhydropyrrolo(1,2- <i>a</i> )pyrimidine methanol solvate hemihydrate |  |



|                              |                                                                                                                                                                                                                                                                                                                                                                     |                                                                                      |
|------------------------------|---------------------------------------------------------------------------------------------------------------------------------------------------------------------------------------------------------------------------------------------------------------------------------------------------------------------------------------------------------------------|--------------------------------------------------------------------------------------|
| PATZES [Wang, 2017]          | $C_{20}H_{20}BrNO_6$<br>(2 <i>S</i> ,3 <i>aR</i> ,4 <i>R</i> ,7 <i>R</i> ,7 <i>aS</i> )-1-((benzyloxy)carbonyl)-5-bromo-7-ethyl-8-oxo-2,3,3 <i>a</i> ,4,7,7 <i>a</i> -hexahydro-1 <i>H</i> -4,7-(epoxymethano)indole-2-carboxylic acid { 3-((benzyloxy)carbonyl)-11-bromo-1-ethyl-9-oxo-8-oxa-3-azatricyclo[5.2.2.0 <sub>2,6</sub> ]undec-10-ene-4-carboxylic acid} | 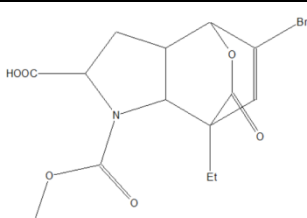    |
| PEFLOB [Baldwin, 1993]       | $C_{22}H_{22}N_2O_5$<br>3-Benzyl-4-benzyloxycarbonyl-8-carboxy-1,4-diazabicyclo(3.3.0)octan-2-one                                                                                                                                                                                                                                                                   |    |
| PIGYEL [Hack, 2013]          | $C_{12}H_{19}NO_4$<br>1-( <i>t</i> -butoxycarbonyl)-4-vinylproline                                                                                                                                                                                                                                                                                                  |    |
| PIZTIE [Venkateshan, 2019]   | $C_{14}H_{15}NO_3$<br>1-(3-phenylacryloyl)proline                                                                                                                                                                                                                                                                                                                   |   |
| POKKAD(01-16) [Lubben, 2014] | $C_7H_{11}NO_4, H_2O$<br>1-acetyl-4-hydroxyproline monohydrate                                                                                                                                                                                                                                                                                                      |  |
| QECWUT [Mykhailiuk, 2017]    | $C_{13}H_{12}FNO_3$<br>2-(benzenecarbonyl)-4-fluoro-2-azabicyclo[2.1.1]hexane-1-carboxylic acid                                                                                                                                                                                                                                                                     |  |
| QILCET [Kraatz, 1999]        | $C_{16}H_{17}FeNO_3$<br><i>N</i> -ferrocenoylproline                                                                                                                                                                                                                                                                                                                |  |
| QOMHAE [Poulie, 2019]        | $C_{18}H_{23}NO_6$<br>1-( <i>t</i> -butoxycarbonyl)-3-[carboxy(phenyl)methyl]- <i>L</i> -proline                                                                                                                                                                                                                                                                    |  |

|                               |                                                                                                                                                                                     |                                                                                      |
|-------------------------------|-------------------------------------------------------------------------------------------------------------------------------------------------------------------------------------|--------------------------------------------------------------------------------------|
| QOMHEI<br>[Poulie, 2019]      | $C_{14}H_{23}NO_6$<br>1-( <i>t</i> -butoxycarbonyl)-3-(1-carboxypropyl)proline                                                                                                      | 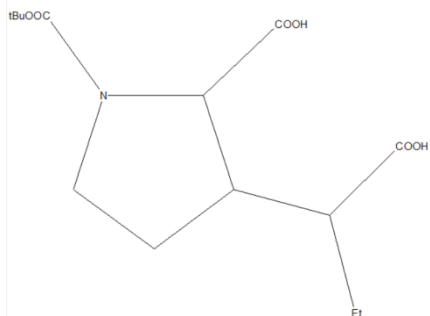   |
| QQQTAR [Camus, 2001]          | $C_{18}H_{20}N_2O_6$<br>1,1'-( <i>p</i> -tolyl)-bis(5-oxopyrrolidine-2-carboxylic acid)                                                                                             |    |
| QQQWAW<br>QQQARG [Ueki, 1971] | <i>See scheme 1, 2</i><br>$C_{28}H_{38}BrN_5O_8$<br>( <i>p</i> -bromobenzoyloxycarbonyl)-glycyl- <i>L</i> -prolyl- <i>L</i> -leucyl-glycyl- <i>L</i> -proline                       |    |
| RACSEU [Bunch, 2003]          | $C_{13}H_{19}NO_6$<br>(+)- <i>N</i> - <i>t</i> -Butoxycarbonyl-2-azanorbornane-3-exo,5-endo-dicarboxylic acid                                                                       |   |
| RARNAA<br>[Koskinen, 2005]    | $C_{14}H_{25}NO_4$<br>(2 <i>S</i> )- <i>N</i> - <i>t</i> -butoxycarbonyl-trans-4- <i>t</i> -butyl- <i>L</i> -proline                                                                |  |
| REFYIK<br>[Guenoun, 1997]     | $C_{20}H_{24}N_2O_6$<br>3 <i>S</i> ,8 <i>aR</i> -6-benzyl-4,6,7,8 <i>a</i> -tetrahydro-7- <i>t</i> -butoxycarbonylpyrrolidino(1,2- <i>a</i> )piperazine-5,8-dione-3-carboxylic acid |  |
| ROKPAI [Ray, 1997]            | $C_{15}H_{12}ClNO_3S$<br>1-( <i>p</i> -chlorophenyl)-5-oxo-3-(2-thienyl)pyrrolidine-2-carboxylic acid                                                                               |  |
| RONCEF [Light, 2019]          | $C_{16}H_{24}N_2O_6, H_2O$<br>1-[6-(2-carboxypyrrolidin-1-yl)-6-oxohexanoyl]pyrrolidine-2-carboxylic acid monohydrate                                                               |  |
| RUWBAM                        | <i>See scheme 1, 2</i>                                                                                                                                                              |                                                                                      |

|                                     |                                                                                                                                                                                                                 |                                                                                      |
|-------------------------------------|-----------------------------------------------------------------------------------------------------------------------------------------------------------------------------------------------------------------|--------------------------------------------------------------------------------------|
| <p>RUVVOW<br/>[Rayner, 2016]</p>    | <p><math>C_{10}H_{17}NO_2S</math><br/>(<i>S</i>)-1-(2,2-dimethylpropanethioyl)proline</p>                                                                                                                       | 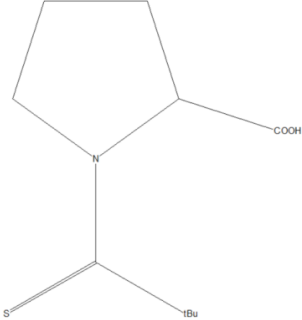   |
| <p>SACDIL [Freabult, 2010]</p>      | <p><math>C_{15}H_{13}NO_4</math><br/>rac-3-benzoyl-2-methyl-2-carboxy-3-azabicyclo(3.2.0)hept-6-ene-4-one</p>                                                                                                   |    |
| <p>SEJSIJ [Emge, 1990]</p>          | <p><math>C_{12}H_{16}N_2O_6</math><br/>1,1'-(1,2-Ethanediy)l-bis(<i>L</i>-pyroglutamic acid)</p>                                                                                                                |    |
| <p>SIWBUV [Pascard, 1991]</p>       | <p><math>C_{17}H_{28}N_2O_5</math>, <math>2(C_2H_6O)</math><br/>(2<i>S</i>,3<i>aS</i>,7<i>aS</i>)-1-(<i>N</i>-(1(<i>S</i>)-carboxy-<i>n</i>-butyl)-(<i>S</i>)-alanyl)-2-carboxyperhyrindole ethanol solvate</p> |   |
| <p>SOWJUL<br/>[Wilhelm, 2014]</p>   | <p><math>C_{37}H_{47}BrN_6O_8</math>, <math>C_2H_3N</math><br/><i>N</i>-(4-bromobenzoyl)hexaproline acetonitrile solvate</p>                                                                                    |  |
| <p>SUGFAE<br/>[Stavyskyi, 2020]</p> | <p><math>C_{15}H_{12}N_4O_4</math><br/>3-methyl-2,8-dioxo-7,8-dihydro-2<i>H</i>-pyrrolo[1,2-<i>a</i>][1,2,4]triazino[2,3-<i>c</i>]quinazoline-5<i>a</i>(6<i>H</i>)-carboxylic acid</p>                          |  |
| <p>SUMZOP [Sasaki, 1994]</p>        | <p><math>C_{11}H_{17}NO_6</math><br/><i>N-t</i>-Butoxycarbonyl-pyrrolidine-2,3-dicarboxylic acid</p>                                                                                                            |  |
| <p>TALBUD [Webb, 1991]</p>          | <p><math>C_{11}H_{16}N_2O_4</math><br/>(4<i>S</i>)-1-(<i>t</i>-butoxycarbonyl)-4-cyano-<i>L</i>-proline</p>                                                                                                     |  |

|                                |                                                                                                                                                                                                                                        |  |
|--------------------------------|----------------------------------------------------------------------------------------------------------------------------------------------------------------------------------------------------------------------------------------|--|
| TIWZUV [Kumar, 2008]           | $C_{15}H_{17}NO_5, H_2O$<br>8,9-dimethoxy-5-oxo-2,3,5,6-tetrahydropyrrolo[2,1-a]isoquinoline-10b(1H)-carboxylic acid monohydrate                                                                                                       |  |
| TPHPRO(01) [Fridrichson, 1962] | $C_{17}H_{22}N_2O_6S, H_2O$<br>tosyl-L-prolyl-L-hydroxyproline monohydrate                                                                                                                                                             |  |
| TUHMEO                         | See scheme 1, 2                                                                                                                                                                                                                        |  |
| TUHMUE                         | See scheme 1, 2                                                                                                                                                                                                                        |  |
| UHULO A [Reuter, 2015]         | $C_{12}H_{19}NO_4$<br>1-( <i>t</i> -butoxycarbonyl)-2-vinylproline                                                                                                                                                                     |  |
| ULUDUA [Hanessian, 2003]       | $C_{14}H_{15}NO_4$<br>(2 <i>S</i> ,3 <i>aS</i> ,8 <i>aR</i> )-1,3 <i>a</i> ,8,8 <i>a</i> -tetrahydro-2 <i>H</i> -3-azacyclopenta( <i>a</i> )indene-2,3-dicarboxylic acid 3-methyl ester                                                |  |
| ULUFAI [Hanessian, 2003]       | $C_{15}H_{17}NO_4$<br>(2 <i>S</i> ,3 <i>aS</i> ,9 <i>bR</i> )-2,3,3 <i>a</i> ,4,5,9 <i>b</i> -hexahydrobenzo( <i>g</i> )indole-1,2-dicarboxylic acid 1-methyl ester                                                                    |  |
| VOBSIR [Marsch, 2019]          | $C_{15}H_{24}N_2O_6, H_2O$<br>1-( <i>t</i> -butoxycarbonyl)prolyl-4-hydroxyproline monohydrate                                                                                                                                         |  |
| WEMLEI [Wang, 2017]            | $C_{20}H_{20}BrNO_6$<br>(2 <i>R</i> ,3 <i>aS</i> ,4 <i>S</i> ,7 <i>S</i> ,7 <i>aR</i> )-1-[(benzyloxy)carbonyl]-5-bromo-7-ethyl-8-oxo-2,3,3 <i>a</i> ,4,7,7 <i>a</i> -hexahydro-1 <i>H</i> -4,7-(epoxymethano)indole-2-carboxylic acid |  |

|                         |                                                                                                                                                                                                                                        |  |
|-------------------------|----------------------------------------------------------------------------------------------------------------------------------------------------------------------------------------------------------------------------------------|--|
| WADVOO [Yuan, 2010]     | C <sub>11</sub> H <sub>19</sub> NO <sub>5</sub><br>(2 <i>R</i> ,4 <i>R</i> )-1-( <i>t</i> -butoxycarbonyl)-4-methoxypyrrolidine-2-carboxylic acid                                                                                      |  |
| WETTOH [Liu, 2018]      | C <sub>16</sub> H <sub>24</sub> FNO <sub>4</sub><br>6-fluoro-1-(hept-5-en-1-yl)-1-hydroxy-2-methyl-3-oxotetrahydro-1 <i>H</i> -pyrrolizine-7 <i>a</i> (5 <i>H</i> )-carboxylic acid                                                    |  |
| XETSOG [Torbeev, 2012]  | C <sub>11</sub> H <sub>19</sub> NO <sub>4</sub><br>1-( <i>t</i> -butoxycarbonyl)-2-methylproline                                                                                                                                       |  |
| XEYXUX [Foley, 2015]    | C <sub>9</sub> H <sub>13</sub> N <sub>5</sub> O <sub>3</sub> , 0.03(H <sub>2</sub> O)<br>(3 <i>S</i> *,4 <i>aS</i> *)-3-(azidomethyl)-1-oxohexahydropyrrolo[1,2- <i>c</i> ]pyrimidine-4 <i>a</i> (5 <i>H</i> )-carboxylic acid hydrate |  |
| YACQAX [Baumann, 2016]  | C <sub>20</sub> H <sub>27</sub> NO <sub>5</sub><br>1-(2,2-dimethylpropanoyl)-4-(methoxycarbonyl)-4-methyl-5-(2-methylphenyl)proline                                                                                                    |  |
| YAXZAZ [Pradelle, 2005] | C <sub>22</sub> H <sub>31</sub> N <sub>3</sub> O <sub>6</sub> , CH <sub>4</sub> O, H <sub>2</sub> O<br>benzyloxycarbonyl-valyl- $\alpha$ -aminoisobutyryl-proline methanol solvate monohydrate                                         |  |
| YAYMAO [Chen, 2012]     | C <sub>13</sub> H <sub>12</sub> N <sub>2</sub> O <sub>3</sub><br>( <i>S</i> )-1-(4-cyanobenzyl)-5-oxoproline                                                                                                                           |  |
| YILTUL [Linden, 2018]   | C <sub>29</sub> H <sub>28</sub> N <sub>2</sub> O <sub>5</sub> , CH <sub>4</sub> O<br><i>N</i> -{[(9 <i>H</i> -fluoren-9-yl)methoxy]carbonyl}phenylalanylproline methanol solvate                                                       |  |
| YOZTIS                  | See scheme 1, 2                                                                                                                                                                                                                        |  |

|                                      |                                                                                                                            |                                                                                      |
|--------------------------------------|----------------------------------------------------------------------------------------------------------------------------|--------------------------------------------------------------------------------------|
| <p>YUJLOF<br/>[Murkherjee, 2009]</p> | <p><math>C_{71}H_{102}CoN_{14}O_{17}PS</math>, 14(<math>H_2O</math>)<br/>captopril-cobalamin tetradecahydrate</p>          | 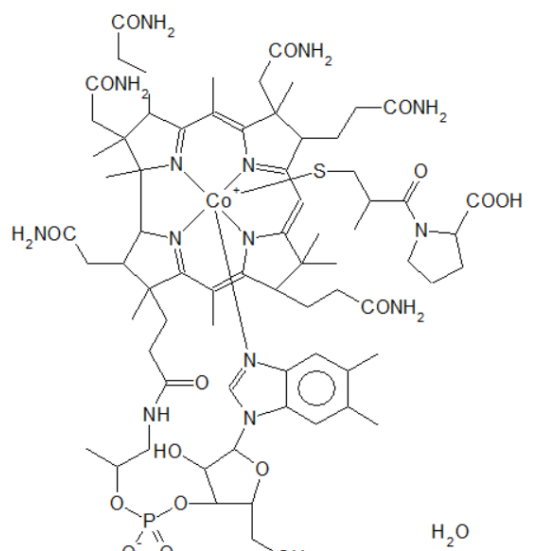   |
| <p>YUJLUL<br/>[Murkherjee, 2009]</p> | <p><math>C_{71}H_{102}CoN_{14}O_{17}PS</math>, 12(<math>H_2O</math>)<br/>captopril-cobalamin dodecahydrate</p>             |   |
| <p>ZAPWUI [Kemp, 1995]</p>           | <p><math>C_{17}H_{23}N_3O_5S</math><br/>cyclo-prolyl-prolyl-proline-4-mercaptopethylcarbonyl</p>                           |  |
| <p>ZIZHAR [Oliver, 1995]</p>         | <p><math>C_{19}H_{26}N_2O_6</math>, <math>H_2O</math><br/><i>N</i>-<i>t</i>-butoxycarbonyl-tyrosyl-proline monohydrate</p> |  |
| <p>ZOKZUU [Ficker, 1995]</p>         | <p><math>C_{19}H_{29}NO_4</math><br/>1-(1-adamantyl)-1-methylethoxycarbonyl-L-proline</p>                                  |  |

|                                                |                                                                                                                                                           |  |
|------------------------------------------------|-----------------------------------------------------------------------------------------------------------------------------------------------------------|--|
| ZUMGIX<br>[Sagnard, 1995]                      | C <sub>11</sub> H <sub>15</sub> NO <sub>5</sub><br><i>N</i> - <i>t</i> -butoxycarbonyl-3,4-methano-5-oxoproline                                           |  |
| ZZZHKK(01)<br>[Jones, 1953;<br>Williams, 2007] | C <sub>11</sub> H <sub>14</sub> N <sub>2</sub> O <sub>6</sub><br>methylene-bis( <i>N</i> -pyrrolidone-2-carboxylic acid)                                  |  |
| ZZZQNE(01)<br>[Sasada, 1961]                   | C <sub>28</sub> H <sub>39</sub> N <sub>5</sub> O <sub>8</sub><br>(benzyloxycarbonyl)-glycyl- <i>L</i> -prolyl- <i>L</i> -leucyl-glycyl- <i>L</i> -proline |  |

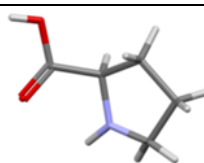

NH - COOH

|                                  |                                                                                                                                                            |  |
|----------------------------------|------------------------------------------------------------------------------------------------------------------------------------------------------------|--|
| ACXMPR<br>[Dupont, 1975]         | C <sub>7</sub> H <sub>10</sub> N <sub>2</sub> O <sub>5</sub><br>3 <i>R</i> -(1' <i>S</i> )-aminocarboxymethyl)-2-pyrrolidone-5( <i>S</i> )-carboxylic acid |  |
| CMPROL [Rao,<br>1974]            | C <sub>6</sub> H <sub>11</sub> NO <sub>2</sub><br><i>cis</i> - <i>d</i> -methyl- <i>L</i> -proline                                                         |  |
| COPFEU<br>[Hammarstrom,<br>2014] | C <sub>12</sub> H <sub>19</sub> NO <sub>5</sub><br>2-(3- <i>t</i> -butoxy-3-oxopropyl)-5-oxoproline solvate                                                |  |
| DHKAIN<br>[Flippen, 1976]        | C <sub>10</sub> H <sub>17</sub> NO <sub>4</sub><br>dihydrokainic acid {2-carboxy-4-isopropyl-3-pyrrolidine-acetic acid}                                    |  |
| FIZDOH [Baird,<br>1987]          | C <sub>5</sub> H <sub>9</sub> NO <sub>4</sub> , H <sub>2</sub> O<br>(2 <i>R</i> ,3 <i>S</i> ,4 <i>R</i> )-3,4-dihydroxyproline monohydrate                 |  |

|                                |                                                                                                                                                                                                                                                                                         |                                                                                      |
|--------------------------------|-----------------------------------------------------------------------------------------------------------------------------------------------------------------------------------------------------------------------------------------------------------------------------------------|--------------------------------------------------------------------------------------|
| FUHRAC<br>[Arman, 2009]        | $C_{10}H_8N_2$ , $2(C_5H_7NO_3)$<br>4,4'-bipyridine bis(pyroglutamic acid)                                                                                                                                                                                                              | 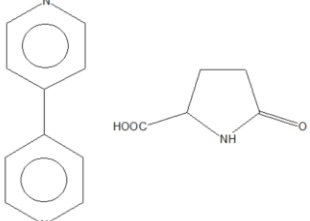   |
| HIBPDC [Kass, 1977]            | $C_9H_{15}NO_4$<br>3-hydroxy-3-isobutyl-2-pyrrolidone-5-carboxylic acid                                                                                                                                                                                                                 |    |
| HUDRAC<br>[Marques, 2019]      | $C_{14}H_9ClF_3NO_2$ , $2(C_5H_9NO_2)$<br>bis(proline) 6-chloro-4-(cyclopropylethynyl)-4-(trifluoromethyl)-1,4-dihydro-2H-3,1-benzoxazin-2-one<br>{bis(proline) (4S)-6-chloro-4-(2-cyclopropylethynyl)-4-(trifluoromethyl)-2,4-dihydro-1H-3,1-benzoxazin-2-one; bis(proline) efavirenz} |    |
| JEPLOF<br>[Voissat, 1990]      | $C_7H_{11}ClNO_4PtS$ , $C_5H_7NO_3$ , $K^+$ , $H_2O$<br>potassium chloro-dimethylsulfoxide-(5-oxoprolinato(2-)-N,O)-platinum(ii) 5-oxoproline monohydrate                                                                                                                               |   |
| KAINAC<br>[Flippen, 1976]      | $C_{10}H_{15}NO_4$<br>kainic acid {2-carboxy-4-isopropenyl-3-pyrrolidine-acetic acid}                                                                                                                                                                                                   |  |
| KAINAH<br>[Watase, 1958]       | $C_{10}H_{15}NO_4$ , $H_2O$<br>kainic acid monohydrate                                                                                                                                                                                                                                  |  |
| LGPYRG [Taira, 1977]           | $C_5H_9NO_4$ , $C_5H_7NO_3$ , $H_2O$<br><i>L</i> -glutamic acid <i>L</i> -pyroglutamic acid monohydrate                                                                                                                                                                                 |  |
| LPYGLU(01..09)<br>[Issa, 2019] | $C_5H_7NO_3$<br><i>L</i> -pyroglutamic acid {5-oxoproline}                                                                                                                                                                                                                              |  |
| MNPROS (10)<br>[Ciunik, 1981]  | $(C_5H_{17}MnNO_{62}^+)_n$ , $n(O_4S_2^-)$<br>catena-tetra-aqua-(m2- <i>D,L</i> -proline)-manganese(ii) sulfate                                                                                                                                                                         |  |



|                                        |                                                                                                                                                                                                                                  |                                                                                      |
|----------------------------------------|----------------------------------------------------------------------------------------------------------------------------------------------------------------------------------------------------------------------------------|--------------------------------------------------------------------------------------|
| <p>NASTUX<br/>[Nomoto, 1992]</p>       | <p><math>C_{15}H_{21}NO_6, 2(H_2O)</math><br/>(2<i>S</i>,3<i>S</i>,4<i>S</i>)-2-carboxy-4-(1-methyl-5(<i>R</i>)-carboxy-1(<i>Z</i>),3(<i>E</i>)-hexadienyl)pyrrolidine-3-acetic acid dihydrate<br/>{ domoic acid dihydrate }</p> | 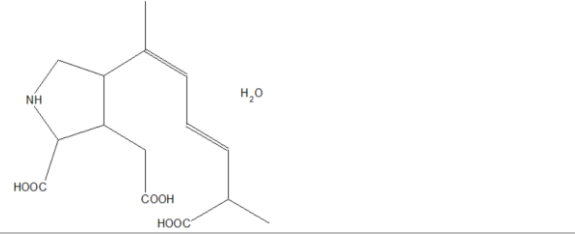    |
| <p>NASVAF<br/>[Nomoto, 1992]</p>       | <p><math>C_{15}H_{21}NO_6</math><br/>isodomoic acid</p>                                                                                                                                                                          |    |
| <p>NAZHAZ<br/>[Desphande, 2012]</p>    | <p><math>C_{21}H_{26}O_5, C_5H_9NO_2, C_5H_9NO_2</math><br/>(2<i>S</i>,3<i>R</i>,4<i>R</i>,5<i>S</i>,6<i>R</i>)-2-(3-(4-ethylbenzyl)-phenyl)-6-hydroxymethyl-tetrahydro-2<i>H</i>-pyran-3,4,5-triol bis(<i>L</i>-proline)</p>    |    |
| <p>NAZLEG<br/>[Fleishhacker, 1996]</p> | <p><math>C_{12}H_{13}NO_3</math><br/>(4<i>S</i>,4<i>S</i>)-4-methyl-4-phenylpyroglutamic acid</p>                                                                                                                                |   |
| <p>PAJFAH<br/>[Klumberger, 1992]</p>   | <p><math>(C_{10}H_{13}LiN_2O_6)_n</math><br/>catena-((m3-<i>L</i>-pyroglutamato-O,O,O'))-(hydrogen <i>L</i>-pyroglutamate-O)-lithium</p>                                                                                         |  |
| <p>PENDAP<br/>[Donohoe, 2012]</p>      | <p><math>C_{31}H_{43}NO_8Si</math><br/>3-(4-acetoxy-1-methoxy-3-methylbutyl)-2-(((<i>t</i>-butyl(diphenyl)silyl)oxy)methyl)-3-hydroxy-4-methyl-5-oxoproline</p>                                                                  |  |
| <p>PROLPT<br/>[Slyudkin, 1990]</p>     | <p><math>C_5H_{12}Cl_2N_2O_2Pt</math><br/>trans-amino-dichloro-(<i>L</i>-proline)-platinum(ii)</p>                                                                                                                               |  |
| <p>SIGJOK<br/>[Tolmachova, 2018]</p>   | <p><math>C_6H_6F_3NO_3</math><br/>5-oxo-3-(trifluoromethyl)proline</p>                                                                                                                                                           |  |
| <p>TUBQIQ<br/>[Cantrell, 1996]</p>     | <p><math>C_{15}H_{17}NO_4</math><br/>(2<i>S</i>,<i>R</i>,3<i>S</i>,<i>R</i>,4<i>S</i>,<i>R</i>)-2-carboxy-4-(1-phenylethenyl)pyrrolidine-3-acetic acid</p>                                                                       |  |

|                            |                                                                                                                                                                                                                    |  |
|----------------------------|--------------------------------------------------------------------------------------------------------------------------------------------------------------------------------------------------------------------|--|
| VAPMIK<br>[Mascitti, 2011] | $C_{22}H_{25}ClO_7$ , $C_5H_7NO_3$ , $0.1(H_2O)$<br>5-(4-chloro-3-(4-ethoxybenzyl)phenyl)-1-(hydroxymethyl)-6,8-dioxabicyclo[3.2.1]octane-2,3,4-triol <i>L</i> -pyroglutamic acid hydrate                          |  |
| WOHRIV<br>[Chandan, 2008]  | $C_9H_{13}NO_3$<br>5-(but-3-en-2-yl)-2-pyrrolidone-5-carboxylic acid                                                                                                                                               |  |
| WOHROB<br>[Chandan, 2008]  | $C_8H_{11}NO_3$<br>5-(prop-2-en-1-yl)-2-pyrrolidone-5-carboxylic acid                                                                                                                                              |  |
| XOJXOL<br>[Panda, 2015]    | $C_5H_7NO_3$<br>2-pyrrolidinone-5-carboxylic acid                                                                                                                                                                  |  |
| YOFSUK<br>[Reingold, 2019] | $C^5H_9N_2O_3^+$ , $Cl^-$<br>5-carboxy-2-oxopyrrolidin-3-aminium chloride                                                                                                                                          |  |
| YOYYOD [Dick, 2019]        | $C_{13}H_{15}NO_3$ , $H_2O$<br>(2 <i>S</i> ,3 <i>aS</i> ,8 <i>aS</i> )-8 <i>a</i> -hydroxy-3 <i>a</i> -methyl-1,2,3,3 <i>a</i> ,8,8 <i>a</i> -hexahydroindeno[2,1- <i>b</i> ]pyrrole-2-carboxylic acid monohydrate |  |

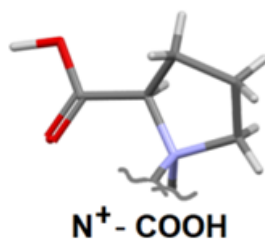

|                         |                                                                                                 |  |
|-------------------------|-------------------------------------------------------------------------------------------------|--|
| GEXTIM<br>[Jones, 1988] | $C_7H_{14}NO_2^+$ , $Cl^-$<br>2-carboxy-1,1-dimethyl-pyrrolidinium chloride                     |  |
| GOJMEX<br>[Jones, 1988] | $C_7H_{14}NO_3^+$ , $Cl^-$<br>trans- <i>N,N</i> -dimethyl-4-hydroxy- <i>L</i> -proline chloride |  |

|                      |                                                                                              |                                                                                    |
|----------------------|----------------------------------------------------------------------------------------------|------------------------------------------------------------------------------------|
| GOJMIB [Jones, 1988] | $C_7H_{14}NO_3^+$ , $Cl^-$<br><i>cis-N,N</i> -dimethyl-4-hydroxy- <i>D</i> -proline chloride | 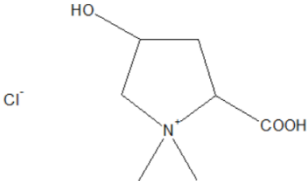 |
|----------------------|----------------------------------------------------------------------------------------------|------------------------------------------------------------------------------------|

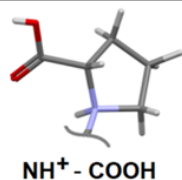

|                              |                                                                                                                                                                                                                                                                                                         |                                                                                       |
|------------------------------|---------------------------------------------------------------------------------------------------------------------------------------------------------------------------------------------------------------------------------------------------------------------------------------------------------|---------------------------------------------------------------------------------------|
| DEKNIS<br>[Milunovic, 2012]  | $C_{15}H_{20}ClCuN_4O_3S^+$ , $Cl^-$<br>(2-((2-carbamothioylhydrazinylidene)methyl)-6-(( <i>R</i> )-(2-carboxypyrrolidinium-1-yl)methyl)-4-methylphenolato)-chloro-copper(ii) chloride<br>{chlorido-(3-methyl- <i>D</i> -prolinium-5-methyl-2-oxidobenzaldehyde thiosemicarbazone)-copper(ii) chloride} | 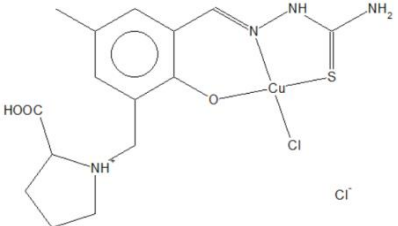   |
| EQIHES<br>[Mykhailiuk, 2011] | $C_{13}H_{17}FNO_2^+$ , $Cl^-$<br>1-benzyl-2-carboxy-5-(fluoromethyl)pyrrolidinium chloride                                                                                                                                                                                                             |   |
| ERURUG<br>[Dobrova, 2016]    | $C_{19}H_{26}ClNi_4O_3PdS^+$ , $Cl^-$<br>(2-carboxy-1-(2-oxy-5-methyl-3-((2-(pyrrolidin-1-yl)(sulfanylidene)methyl)hydrazono)methyl)benzyl)pyrrolidiniumato)-chloro-palladium(ii) chloride                                                                                                              |  |
| ERUSAN<br>[Dobrova, 2016]    | $C_{19}H_{26}ClNi_4NiO_3S^+$ , $Cl^-$<br>(2-carboxy-1-(2-oxy-5-methyl-3-((2-(pyrrolidin-1-yl)(sulfanylidene)methyl)hydrazono)methyl)benzyl)pyrrolidiniumato)-chloro-nickel chloride                                                                                                                     |  |
| ESIJOH<br>[Albrecht, 2016]   | $C_{14}H_{14}F_6NO_2^+$ , $Cl^-$<br>1-(3,5-bis(trifluoromethyl)benzyl)-2-carboxypyrrolidinium chloride                                                                                                                                                                                                  |  |
| GEXTEI<br>[Jones, 1988]      | $C_6H_{12}NO_2^+$ , $Cl^-$<br>1-methyl- <i>L</i> -prolinium chloride {hygric acid hydrochloride}                                                                                                                                                                                                        |  |

|                                        |                                                                                                                                                                                                                                                                                                                                                                                                                                                                                 |                                                                                       |
|----------------------------------------|---------------------------------------------------------------------------------------------------------------------------------------------------------------------------------------------------------------------------------------------------------------------------------------------------------------------------------------------------------------------------------------------------------------------------------------------------------------------------------|---------------------------------------------------------------------------------------|
| <p>GOJMAT<br/>[Jones,<br/>1988]</p>    | <p><math>C_6H_{12}NO_3^+</math>, <math>Cl^-</math><br/><i>N</i>-methyl-4-hydroxy-<i>L</i>-proline hydrochloride</p>                                                                                                                                                                                                                                                                                                                                                             | 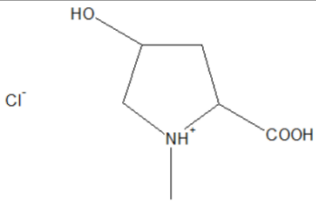    |
| <p>HIBZOH<br/>[Jones,<br/>1995]</p>    | <p><math>C_6H_{12}NO_3^+</math>, <math>Cl^-</math><br/>trans-3-hydroxy-<i>N</i>-methyl-<i>L</i>-proline hydrochloride</p>                                                                                                                                                                                                                                                                                                                                                       |    |
| <p>ROFQUZ<br/>[Dai, 2008b]</p>         | <p><math>C_{11}H_{16}N_2O_{22}^+</math>, <math>2(Cl^-)</math>, <math>0.5(H_2O)</math><br/>(1<i>S</i>,2<i>S</i>)-2-carboxy-1-(3-pyridinylmethyl)pyrrolidin-1-ium dichloride hemihydrate<br/>{(1<i>S</i>,2<i>S</i>)-1-((pyridin-3'-yl)methyl)pyrrolidine-2-carboxylic acid-1,1'-ium dichloride hemihydrate }</p>                                                                                                                                                                  |    |
| <p>TECSIG<br/>[Novitchi,<br/>2017]</p> | <p><math>C_{14}H_{18}NO_4^+</math>, <math>C_{14}H_{17}NO_4</math>, <math>Cl^-</math><br/>2-carboxy-1-[(3-formyl-2-hydroxy-5-methylphenyl)methyl]pyrrolidin-1-ium chloride 1-[(3-formyl-2-hydroxy-5-methylphenyl)methyl]proline</p>                                                                                                                                                                                                                                              |   |
| <p>URIHAF<br/>[Zhang,<br/>2011]</p>    | <p><math>C_{52}H_{60}N_4O_{12}</math>, <math>11(H_2O)</math><br/>1-((11-((2-carboxylatopyrrolidin-1-yl)methyl)-17-((2-carboxypyrrrolidin-1-yl)methyl)-23-((2-carboxypyrrrolidin-1-yl)methyl)-25,26,27,28-tetrahydroxypentacyclo[19.3.1.13.7.19,13.115,19]octacos-1(25),3(28),4,6,9(27),10,12,15(26),16,18,21,23-dodecaen-5-yl)methyl)pyrrolidinium-2-carboxylate undecahydrate<br/>{5,11,17,23-tetrakis(Prolylmethyl)-25,26,27,28-tetrahydroxycalix(4)arene undecahydrate }</p> |  |
| <p>VANBOB<br/>[Sawka,<br/>1989]</p>    | <p><math>C_6H_{12}NO_5P</math><br/><i>N</i>-phosphonomethyl-<i>L</i>-proline</p>                                                                                                                                                                                                                                                                                                                                                                                                |  |

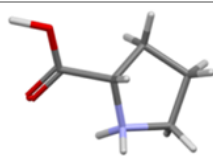

$NH_2^+ - COOH$

|                                 |                                                                                                                                                                                                    |                                                                                      |
|---------------------------------|----------------------------------------------------------------------------------------------------------------------------------------------------------------------------------------------------|--------------------------------------------------------------------------------------|
| <p>ADALIA<br/>[Swamy, 2001]</p> | <p><math>C_5H_{10}NO_2^+</math>, <math>C_{23}H_{30}O_4P^-</math><br/><i>S</i>-proline (46,63-di-<i>t</i>-butyl-44,65-dimethyl-4,6(1,2)-dibenzena-1,3,2-dioxaphosphacyclohexaphane 2,2-dioxide)</p> | 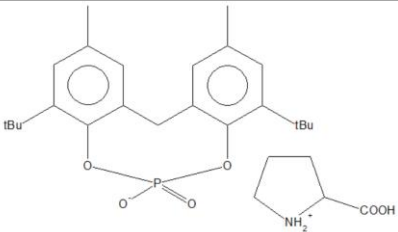 |
|---------------------------------|----------------------------------------------------------------------------------------------------------------------------------------------------------------------------------------------------|--------------------------------------------------------------------------------------|

|                                |                                                                                                                                                                                                                             |                                                                                      |
|--------------------------------|-----------------------------------------------------------------------------------------------------------------------------------------------------------------------------------------------------------------------------|--------------------------------------------------------------------------------------|
| CADKOJ<br>[Gharzaryan, 2011]   | $C_5H_{10}NO_2^+$ , $C_5H_9NO_2$ , $BF_4^-$<br><i>L</i> -prolinium <i>L</i> -proline tetrafluoroborate                                                                                                                      | 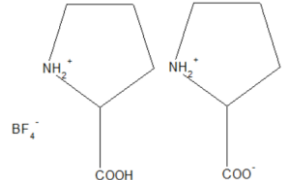   |
| CADKUP*<br>[Gharzaryan, 2011]  | $C_5H_9NO_2$ , $Br^-$ , $C_5H_{10}NO_2^+$<br><i>L</i> -prolinium <i>L</i> -proline bromide                                                                                                                                  |    |
| CADLIE<br>[Gharzaryan, 2011]   | $C_5H_9NO_2$ , $Cl^-$ , $C_5H_{10}NO_2^+$<br><i>L</i> -proline <i>L</i> -prolinium chloride                                                                                                                                 |    |
| DLPROL<br>[Mitsui, 1969]       | $C_5H_{10}NO_2^+$ , $Cl^-$<br><i>D,L</i> -proline hydrochloride                                                                                                                                                             |    |
| DODWEY<br>[Andersen, 1986]     | $C_5H_7NO_2S$<br>5-thioxoproline                                                                                                                                                                                            |   |
| EXIBOC(04)<br>[Jin, 2003]      | $C_5H_{10}NO_2^+$ , $C_6H_2N_3O_7^-$<br><i>L</i> -prolinium picrate                                                                                                                                                         |  |
| FEWQIK<br>[Kondratov, 2018]    | $C_7H_9F_2NO_4$<br>(2-carboxypyrrolidin-1-ium-3-yl)(difluoro)acetate                                                                                                                                                        |  |
| IDIMIT<br>[Hobart, 2013]       | $C_{12}H_{14}Cl_2NO_2Pd^+$ , $C_{12}H_{16}NO_2^+$<br>( <i>S</i> )-a-benzylprolinium cis-[( <i>S</i> )-a-benzylprolinato]dichloridopalladium(II)<br>{2-benzyl-2-carboxypyrrolidinium (2-benzylprolinato)(dichloro)palladate} |  |
| IDINAK*<br>[Pandjarajan, 2002] | $C_5H_9NO_2$ , $C_5H_{10}NO_2^+$ , $ClO_4^-$<br>bis( <i>L</i> -proline) hydrogen perchlorate                                                                                                                                |  |

|                                |                                                                                                                                                                                                                                                                                                                                                                       |  |
|--------------------------------|-----------------------------------------------------------------------------------------------------------------------------------------------------------------------------------------------------------------------------------------------------------------------------------------------------------------------------------------------------------------------|--|
| LONBUN*<br>[Ghazaryan, 2014]   | 2(C <sub>5</sub> H <sub>10</sub> NO <sub>2</sub> <sup>+</sup> ), C <sub>5</sub> H <sub>9</sub> NO <sub>2</sub> , F <sub>6</sub> Si <sub>2</sub> <sup>-</sup> , H <sub>2</sub> O<br>bis(2-carboxypyrrolidinium) pyrrolidinium-2-carboxylate hexafluorosilicate monohydrate<br>{tris(proline) hexafluorosilicate monohydrate}                                           |  |
| LUDFOF<br>[Pandiarajan, 2002]  | C <sub>5</sub> H <sub>9</sub> NO <sub>2</sub> , C <sub>5</sub> H <sub>10</sub> NO <sub>2</sub> <sup>+</sup> , NO <sub>3</sub> <sup>-</sup><br>bis( <i>L</i> -proline) hydrogen nitrate                                                                                                                                                                                |  |
| MODHEU<br>[Vasiuta, 2014]      | C <sub>7</sub> H <sub>12</sub> NO <sub>3</sub> <sup>+</sup> , C <sub>7</sub> H <sub>11</sub> NO <sub>3</sub> , Cl <sup>-</sup><br>4-(hydroxymethyl)-2-azabicyclo[2.1.1]hexane-1-carboxylic acid 4-(hydroxymethyl)-2-azabicyclo[2.1.1]hexane-1-carboxylate chloride                                                                                                    |  |
| MPROL<br>[Fuimoto, 1971]       | C <sub>6</sub> H <sub>10</sub> NO <sub>2</sub> <sup>+</sup> , Cl <sup>-</sup> , H <sub>2</sub> O<br><i>cis</i> -3,4-methylene- <i>L</i> -proline hydrochloride monohydrate                                                                                                                                                                                            |  |
| NEKCIP<br>[Wittland, 1997]     | C <sub>8</sub> H <sub>9</sub> NO <sub>8</sub><br>(2 <i>R</i> ,3 <i>S</i> ,3 <i>R</i> ,4 <i>R</i> ,5 <i>S</i> ,5 <i>R</i> ,5 <i>S</i> )-pyrrolidine-2,3,4,5-tetracarboxylic acid                                                                                                                                                                                       |  |
| NUXYIO<br>[Hardeis, 1997]      | C <sub>5</sub> H <sub>9</sub> CINO <sub>3</sub> <sup>+</sup> , Cl <sup>-</sup><br>(2 <i>S</i> ,3 <i>R</i> ,4 <i>R</i> )-2-carboxy-4-chloro-3-hydroxypyrrolidine hydrochloride<br>{all- <i>trans</i> -4-chloro-3-hydroxy- <i>L</i> -proline hydrochloride}                                                                                                             |  |
| OLIZAL*<br>[Qu, 2011]          | 2(C <sub>5</sub> H <sub>9</sub> NO <sub>2</sub> ), 2(C <sub>5</sub> H <sub>10</sub> NO <sub>2</sub> <sup>+</sup> ), 2(C <sub>12</sub> H <sub>4</sub> N <sub>4</sub> <sup>-</sup> ), C <sub>12</sub> H <sub>4</sub> N <sub>4</sub><br>bis(2-carboxypyrrolidinium) bis(7,7,8,8-tetracyanoquinodimethanide)<br>bis(tetracyanoquinodimethane) pyrrolidinium-2-carboxylate |  |
| POMFEE<br>[Fleck, 2015]        | C <sub>5</sub> H <sub>10</sub> NO <sub>2</sub> <sup>+</sup> , H <sub>2</sub> O <sub>3</sub> P <sup>-</sup><br>2-carboxypyrrolidinium hydrogen phosphonate<br>{ <i>L</i> -proline hydrogen phosphite}                                                                                                                                                                  |  |
| PROLNH*<br>[Swaminathan, 2011] | C <sub>5</sub> H <sub>10</sub> NO <sub>2</sub> <sup>+</sup> , C <sub>5</sub> H <sub>9</sub> NO <sub>2</sub> , Cl <sup>-</sup><br><i>D,L</i> -proline hemihydrochloride                                                                                                                                                                                                |  |

|                                 |                                                                                                               |                                                                                    |
|---------------------------------|---------------------------------------------------------------------------------------------------------------|------------------------------------------------------------------------------------|
| QIJYIR<br>[Nandhini,<br>2011]   | $C_5H_{10}NO_2^+$ , $C_4H_5O_6^-$<br><i>L</i> -prolinium hydrogen tartrate                                    | 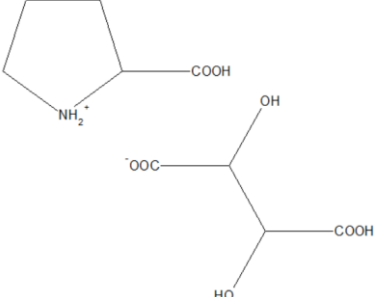 |
| SIGJIE<br>[Tolmachova,<br>2011] | $C_7H_9F_5NO_2^+$ , $H_2O$ , $Cl^-$<br>2-carboxy-3-(pentafluoroethyl)pyrrolidin-1-ium<br>chloride monohydrate |  |
| XUYVAO<br>[Rajagopal,<br>2003]  | $C_5H_{10}NO_2^+$ , $C_2Cl_3O_2^-$<br><i>L</i> -prolinium trichloroacetate                                    |  |

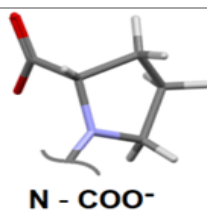

|                          |                                                                                                                                                   |                                                                                      |
|--------------------------|---------------------------------------------------------------------------------------------------------------------------------------------------|--------------------------------------------------------------------------------------|
| AFAFAP [Pilati,<br>2007] | $C_9H_{14}N_2O_3$<br>6-ammonio-5-oxooctahydroindolizine-3-carboxylate                                                                             | 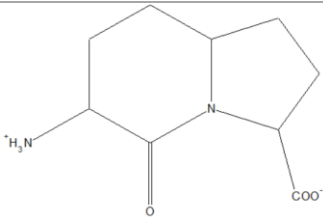 |
| BAHPYC<br>[Kanao, 1978]  | $2(C_6H_8NO_4^-)$ , $Ba_2^+$ , $H_2O$<br>barium bis ( <i>N</i> -hydroxymethylpyrrolid-5-one-1-<br>carboxylate) monohydrate                        |  |
| BIRYOQ<br>[Martin, 1999] | $Na^+$ , $C_{10}H_{14}NO_4^-$<br>sodium (5 <i>S</i> ,6 <i>S</i> ,9 <i>S</i> )-5-hydroxy-5-methyl-1-<br>azabicyclo[4.3.0]nonan-2-one-9-carboxylate |  |
| EMOCAL<br>[Bhuyan, 2011] | $C_{12}H_{24}N^+$ , $C_9H_{13}BrNO_3^-$<br>dicyclohexylammonium 1-(3-bromo-2-<br>methylpropanoyl)pyrrolidine-2-carboxylate                        |  |

|                                       |                                                                                                                                                                                               |  |
|---------------------------------------|-----------------------------------------------------------------------------------------------------------------------------------------------------------------------------------------------|--|
| LEYQAK<br>[Tlahuext, 2018]            | $C_6H_7NO_2S_{22}^-$ , $3(H_2O)$ , $2(Rb^+)$<br>bis(rubidium) 1-carbodithioatopyrrolidine-2-carboxylate trihydrate {bis(rubidium) 1-carbodithioatoprolinate trihydrate}                       |  |
| CAFKID<br>[Watson, 1983]              | $C_6H_{11}N_3O_3$ , $H_2O$<br>1-amino(imino)methyl-2-hydroxypyrrolidine-2-carboxylic acid monohydrate                                                                                         |  |
| EDALEC<br>GAKZEY<br>[Slepokura, 2005] | <i>See scheme 1, 2</i><br>$C_6H_{11}N_3O_3$ , $H_2O$<br><i>N</i> -Amidino-4-hydroxy- <i>L</i> -proline monohydrate                                                                            |  |
| GEHMAI<br>[Dittrich, 2006]            | $C_{14}H_{18}N_2O_3$ , $H_2O$<br><i>L</i> -phenylalanyl- <i>L</i> -proline monohydrate                                                                                                        |  |
| GERWUX(01)                            | <i>See scheme 1, 2</i>                                                                                                                                                                        |  |
| GERXAE                                | <i>See scheme 1, 2</i>                                                                                                                                                                        |  |
| GERXEI                                | <i>See scheme 1, 2</i>                                                                                                                                                                        |  |
| GLHPRA<br>[Garbay, 1980]              | $C_7H_{12}N_2O_4$<br>glycyl- <i>L</i> -4-hydroxyproline                                                                                                                                       |  |
| IDAFAX [Roy, 2016]                    | $C_{24}H_{22}ClN_2O_6^-$ , $C_{10}H_{18}N^+$ , $2(H_2O)$<br>adamantan-1-aminium 1-((1-(4-chlorobenzoyl)-5-methoxy-2-methyl-1H-indol-3-yl)acetyl)-4-hydroxypyrrolidine-2-carboxylate dihydrate |  |
| IVEGIA                                | <i>See scheme 1, 2</i>                                                                                                                                                                        |  |



|                               |                                                                                                                                                                                                                                                                                                          |  |
|-------------------------------|----------------------------------------------------------------------------------------------------------------------------------------------------------------------------------------------------------------------------------------------------------------------------------------------------------|--|
| JADVAL<br>[Panerselvan, 1989] | $C_{14}H_{18}N_2O_3, H_2O$<br><i>L</i> -phenylalanyl- <i>L</i> -proline monohydrate                                                                                                                                                                                                                      |  |
| LEYQEO<br>[Tlahuext, 2018]    | $C_6H_7NO_2S_{22}^-, 2(H_2O), 2(Cs^+)$<br>bis(cesium) 1-carbodithioatopyrrolidine-2-carboxylate dihydrate<br>{ bis(cesium) 1-carbodithioatoprolinate dihydrate }                                                                                                                                         |  |
| LPROHP20<br>[Garbay, 1980]    | $C_{10}H_{16}N_2O_4, H_2O$<br><i>L</i> -prolyl- <i>L</i> -4-hydroxyproline monohydrate                                                                                                                                                                                                                   |  |
| MAZMAE01<br>[Tlahuext, 2018]  | $C_6H_7NO_2S_{22}^-, 3(H_2O), 2(K^+)$<br>bis(potassium) 1-carbodithioatopyrrolidine-2-carboxylate trihydrate<br>{ bis(potassium) 1-carbodithioato- <i>L</i> -prolinate trihydrate }                                                                                                                      |  |
| NOXWAA<br>[Wartchow, 2014]    | $C_{26}H_{38}N_2O_6S, H_2O$<br>(2 <i>S</i> , <i>R</i> ,2' <i>S</i> , <i>R</i> ,3 <i>S</i> , <i>R</i> )-1,2,4,5,6,7,8,9-octahydro-1'-[(4-methoxy-2,3,6-trimethyl phenyl)-sulfonyl]-1-methyl-2-(2-oxopropyl)-spiro[3H-indol-3,3'-pyrrolidin]-2'-carboxylic acid monohydrate                                |  |
| SEHGES<br>[Moggach, 2006]     | $C_7H_{12}N_2O_3, 0.5(H_2O)$<br>glycyl- <i>L</i> -proline hemihydrate                                                                                                                                                                                                                                    |  |
| TUHMOY                        | <i>See scheme 1, 2</i>                                                                                                                                                                                                                                                                                   |  |
| TUHMUE                        | <i>See scheme 1, 2</i>                                                                                                                                                                                                                                                                                   |  |
| UGUYUQ<br>[Macias, 2002]      | $C_4H_{20}CuN_2O_{42}^+, C_{12}H_{14}CuN_2O_4S_{42}^-$<br>(ethylenediamine)-(ethanol)-triqua-copper(ii) bis(proline-dithiocarbamate)-copper(ii)                                                                                                                                                          |  |
| UROLAQ<br>[Bakonyi, 2013]     | $C_{11}H_{16}NO_4^-, C_8H_{12}NO^+$<br>2-hydroxy-1-phenylethanaminium 3-( <i>t</i> -butoxycarbonyl)-3-azabicyclo[3.1.0]hexane-2-carboxylate<br>{ ( <i>R</i> )-phenylglycinolium (+)-trans-(1 <i>R</i> ,2 <i>R</i> ,5 <i>S</i> )-3-( <i>t</i> -butoxy-carbonyl)-3-azabicyclo[3.1.0]hexane-2-carboxylate } |  |
| UZOVAH(01,03)                 | <i>See scheme 1, 2</i>                                                                                                                                                                                                                                                                                   |  |
| UZOVIP                        | <i>See scheme 1, 2</i>                                                                                                                                                                                                                                                                                   |  |
| VEDBOW<br>[Bialonska, 2006]   | $C_{23}H_{27}N_2O_4^+, C_{10}H_{16}NO_4^-, C_2H_6O, H_2O$<br>brucinium <i>N</i> -( <i>t</i> -butoxycarbonyl)- <i>L</i> -prolinate ethanol solvate monohydrate                                                                                                                                            |  |

|                                        |                                                                                                                                                                                                                                                                                                       |                                                                                    |
|----------------------------------------|-------------------------------------------------------------------------------------------------------------------------------------------------------------------------------------------------------------------------------------------------------------------------------------------------------|------------------------------------------------------------------------------------|
| <p>VIRWUO(01)<br/>[Bowler, 1991]</p>   | <p><math>C_{18}H_{21}N_2O_7S^-</math>, <math>C_{12}H_{24}N^+</math><br/>dicyclohexylammonium <i>t</i>-butoxycarbonyl-4-(1-methyl-3,3-dioxo-3<math>\beta</math>-thiaisoindolinyl)-3-oxoproline</p>                                                                                                     | 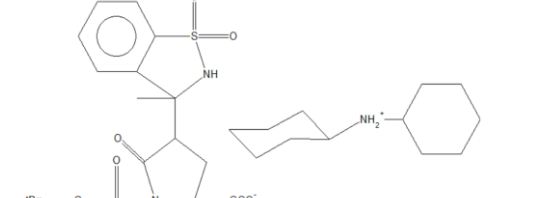 |
| <p>WAPVUF<br/>[Eustache, 2005]</p>     | <p><math>C_{12}H_{18}NO_4^-</math>, <math>C_{12}H_{24}N^+</math><br/>dicyclohexylammonium (2<i>S</i>,5<i>R</i>)-<i>N</i>-<i>t</i>-butoxycarbonyl-5-vinylpyrrolidine-2-carboxylate</p>                                                                                                                 |  |
| <p>WIPXUO<br/>[Nikiforovich, 1996]</p> | <p><math>C_{30}H_{37}N_5O_7S_2</math>, <math>2(C_2H_6O)</math><br/>tyrosyl-cyclo(<i>D</i>-b,<i>b</i>-dimethylcysteinyl-glycyl-phenylalanyl-<i>D</i>-trans-3-mercaptoproline) ethanol solvate<br/>{ cyclic peptide (4 residues): CYS*!-GLY-PHE-PRO*,<br/>acyclic peptide (2 residues): TYR-CYS*! }</p> |  |

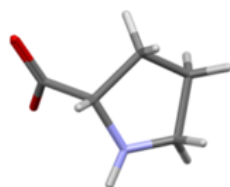

NH - COO<sup>-</sup>

|                                     |                                                                                                                                                                                            |                                                                                      |
|-------------------------------------|--------------------------------------------------------------------------------------------------------------------------------------------------------------------------------------------|--------------------------------------------------------------------------------------|
| <p>CPISIN<br/>[Eberle, 1980]</p>    | <p><math>C_{22}H_{20}Cl_2NO^+</math>, <math>C_5H_6NO_3^-</math><br/>(a<i>S</i>,1<i>S</i>)-(+)-a,1-bis(4-chlorophenyl)-isoindoline-1-ethanol (<i>S</i>)-(-)-5-carboxylato-2-pyrrolidone</p> | 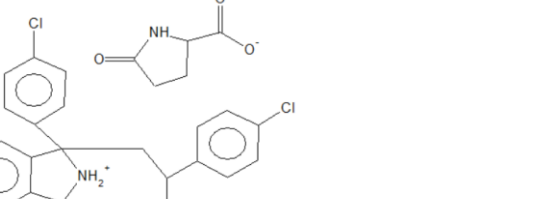 |
| <p>FIRGUL<br/>[Babor, 2019]</p>     | <p><math>C_{10}H_{16}NO^+</math>, <math>C_5H_6NO_3^-</math>, <math>H_2O</math><br/>1-hydroxy-<i>N</i>-methyl-1-phenylpropan-2-aminium 5-oxopyrrolidine-2-carboxylate monohydrate</p>       |  |
| <p>HOGZIN<br/>[Kim, 2008]</p>       | <p><math>C_5H_6NO_5^-</math>, <math>H_4N^+</math>, <math>H_2O</math><br/>ammonium (3'<i>S</i>,4'<i>S</i>,5'<i>S</i>)-(3',4'-dihydroxypyrrrolidin-2'-one-5'-yl)formate monohydrate</p>      |  |
| <p>KIBKEL<br/>[Minacheva, 1989]</p> | <p><math>C_{12}H_{24}N_6O_6Pt_2</math>, <math>4(H_2O)</math><br/>bis(Hydroxyproline-<i>N</i>)-bis(thiourea-<i>S</i>)-platinum(ii) tetrahydrate</p>                                         |  |

|                                     |                                                                                                                                                                                                                                                                                                                                        |                                                                                      |
|-------------------------------------|----------------------------------------------------------------------------------------------------------------------------------------------------------------------------------------------------------------------------------------------------------------------------------------------------------------------------------------|--------------------------------------------------------------------------------------|
| <p>KUTCOS<br/>[Kaczmarek, 2010]</p> | <p><math>C_5H_8N_2O_3</math><br/>(2<i>S</i>,4<i>R</i>)-4-ammonio-5-oxopyrrolidine-2-carboxylate</p>                                                                                                                                                                                                                                    | 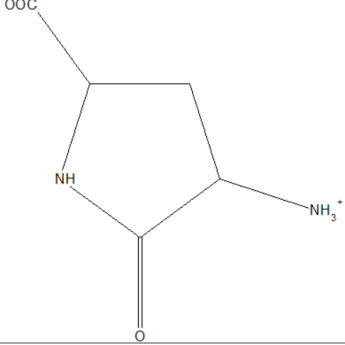   |
| <p>LOQQAJ<br/>[Sakai, 1999]</p>     | <p><math>C_9H_{16}N_2O</math><br/>dysibetaine {(2<i>R</i>,4<i>R</i>)-2-(trimethylammonium)methyl-4-hydroxy-5-oxoprolinate}</p>                                                                                                                                                                                                         |    |
| <p>PAMPOL<br/>[Kodama, 2014]</p>    | <p><math>C_{16}H_{28}NO^+</math>, <math>C_5H_6NO_3^-</math><br/>1-(3,5-di-<i>t</i>-butyl-2-hydroxyphenyl)ethanaminium 5-oxopyrrolidine-2-carboxylate<br/>{1-(3,5-di-<i>t</i>-butyl-2-hydroxyphenyl)ethanaminium <i>L</i>-pyroglutamate}</p>                                                                                            |    |
| <p>XAGZUB<br/>[Zhang, 2004]</p>     | <p><math>(C_{120}H_{264}ClCu_{30}N_{24}Nd_6O_{10323+})_n</math>, <math>11n(HO^-)</math>, <math>12n(ClO_4^-)</math>, <math>6n(H_2O)</math><br/>catena-[triacontakis(m3-Hydroxo)-tetracosakis(m-L-prolinate)-(m-perchlorate)-hencosakis(aqua)-triacontacopper(ii)-hexa-neodymium(iii) undecahydroxide dodecaperchlorate hexahydrate]</p> |   |
| <p>VIRWUQ<br/>[Wen, 2013]</p>       | <p><math>(C_{14}H_{22}N_4O_2Zn_2^+)_n</math>, <math>n(C_5H_6NO_3^-)</math>, <math>n(ClO_4^-)</math>, <math>3n(H_2O)</math><br/>catena-[(m2-<i>N,N'</i>-bis(pyridin-4-ylmethyl)ethane-1,2-diamine)-diaqua-zinc (<i>R</i>)-5-oxopyrrolidine-2-carboxylate perchlorate trihydrate]</p>                                                    |  |
| <p>VIWFOW<br/>[Kumberger, 1991]</p> | <p><math>(C_5H_{10}NNaO_5)_n</math>, <math>n(H_2O)</math><br/>catena-(bis(m2-Aqua-O,O)-(m2-L-pyroglutamate-O,O)-sodium monohydrate)<br/>{catena-(bis(m2-aqua)-(m2-2-pyrrolidone-5-carboxylate-O,O)-sodium monohydrate)}</p>                                                                                                            |  |
| <p>WAWSIW<br/>[Khokhar, 1993]</p>   | <p><math>C_{16}H_{30}N_4O_4Pt</math>, <math>CH_4O</math>, <math>2(H_2O)</math><br/>bis(<i>L</i>(-)-prolinate-<i>N</i>)-(trans-<i>R,R</i>-1,2-diaminocyclohexane)-platinum(ii) methanol solvate dihydrate</p>                                                                                                                           |  |

|                                       |                                                                                                                                                      |                                                                                    |
|---------------------------------------|------------------------------------------------------------------------------------------------------------------------------------------------------|------------------------------------------------------------------------------------|
| <p>WAWSOC<br/>[Khokhar,<br/>1993]</p> | <p><math>C_{16}H_{30}N_4O_4Pt, 6(H_2O)</math><br/>bis(<i>L</i>(-)-prolinato-<i>N</i>)-(cis-1,2-diaminocyclohexane)-<br/>platinum(ii) hexahydrate</p> | 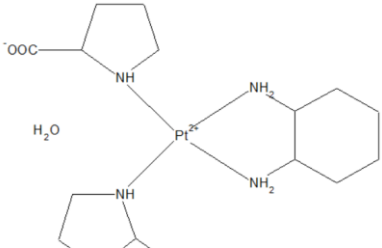 |
|---------------------------------------|------------------------------------------------------------------------------------------------------------------------------------------------------|------------------------------------------------------------------------------------|

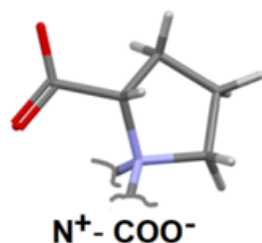

|                                             |                                                                                                                                                                                                                                                                                                  |                                                                                      |
|---------------------------------------------|--------------------------------------------------------------------------------------------------------------------------------------------------------------------------------------------------------------------------------------------------------------------------------------------------|--------------------------------------------------------------------------------------|
| <p>BIKMUE<br/>[Kirbimizeknes,<br/>2004]</p> | <p><math>C_{16}H_{19}NO_5, 2(H_2O)</math><br/>(2<i>S</i>,4<i>R</i>)-2-carboxy-4-((<i>E</i>)-3-(4-hydroxyphenyl)prop-<br/>2-enoyloxy)-1,1-dimethylpyrrolidinium dihydrate<br/>{(2<i>S</i>,4<i>R</i>)-2-carboxy-4-((<i>E</i>)-<i>p</i>-coumaroyloxy)-1,1-<br/>dimethylpyrrolidinium dihydrate}</p> | 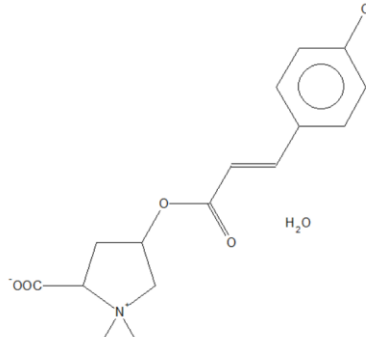 |
| <p>FUPTOB<br/>[Turdybekov,<br/>2013]</p>    | <p><math>C_7H_{13}NO_2, H_2O</math><br/>1,1-dimethylpyrrolidinium-2-carboxylate<br/>monohydrate</p>                                                                                                                                                                                              |  |
| <p>JOKLOM<br/>[zhang, 2014]</p>             | <p><math>2(C_{19}H_{20}N_2O_2), CH_4O, H_2O</math><br/>4,16-cyclocoryn-19-en-4-ium-17-oate methanol<br/>solvate monohydrate</p>                                                                                                                                                                  |  |
| <p>KILKAS<br/>[Jenkinson,<br/>2007]</p>     | <p><math>C_7H_{13}NO_3, H_2O</math><br/>(2<i>R</i>,3<i>S</i>)-3-hydroxy-<i>N,N</i>-dimethylproline<br/>monohydrate</p>                                                                                                                                                                           |  |
| <p>REGKUK<br/>[Razzakov,<br/>2005]</p>      | <p><math>C_7H_{13}NO_3, CH_4N_2O</math><br/>trans-<i>N,N</i>-dimethyl-4-hydroxy-<i>L</i>-proline urea<br/>betonicin urea}</p>                                                                                                                                                                    |  |

|                          |                                                                                                                                                                                                               |                                                                                    |
|--------------------------|---------------------------------------------------------------------------------------------------------------------------------------------------------------------------------------------------------------|------------------------------------------------------------------------------------|
| XUHZOR<br>[Wang, 2015]   | C <sub>6</sub> H <sub>11</sub> N <sub>3</sub> O <sub>2</sub> , H <sub>2</sub> O<br>1-(diaminomethylene)pyrrolidinium-2-carboxylate monohydrate {(S)-1-carbamimidoylpyrrolidine-2-carboxylic acid monohydrate} | 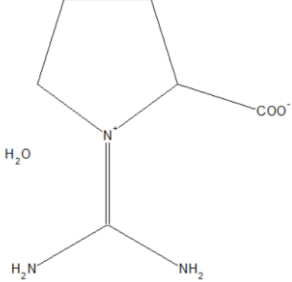 |
| ZATNIR<br>[O`neil, 1995] | C <sub>12</sub> H <sub>15</sub> NO <sub>3</sub><br>1-benzyl-(1R)-oxide-(2S)-proline                                                                                                                           |  |

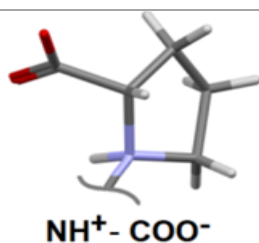

|                            |                                                                                                                                                                                                                                                                         |                                                                                      |
|----------------------------|-------------------------------------------------------------------------------------------------------------------------------------------------------------------------------------------------------------------------------------------------------------------------|--------------------------------------------------------------------------------------|
| CEFVAM<br>[Edgeley, 2012]  | C <sub>9</sub> H <sub>15</sub> NO <sub>7</sub><br>1-(2-carboxyethyl)-3,4-dihydroxy-5-(hydroxymethyl)pyrrolidinium-2-carboxylate<br>{N-(2-carboxyethyl)-2,5-dideoxy-2,5-imino-D-mannonic acid;<br>(3R,4R,5R)-1-(2-carboxyethyl)-3,4-dihydroxy-5-hydroxymethyl-L-proline} | 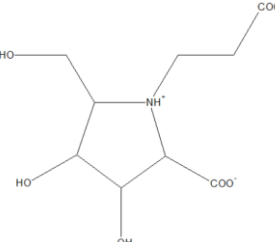 |
| ERUSER<br>[Dobrova, 2016]  | C <sub>19</sub> H <sub>26</sub> N <sub>4</sub> O <sub>3</sub> S, 1.25(CH <sub>4</sub> O)<br>1-(2-hydroxy-5-methyl-3-(((pyrrolidin-1-ylcarbonothioyl)hydrazono)methyl)benzyl)pyrrolidinium-2-carboxylate methanol solvate                                                |  |
| FUMJIH<br>[Renzi, 2010]    | C <sub>17</sub> H <sub>27</sub> NO <sub>3</sub> , C <sub>2</sub> H <sub>6</sub> O <sub>2</sub><br>1-(3-butyl-6-oxobicyclo[2.2.2]oct-2-yl)pyrrolidinium-2-carboxylate ethane-1,2-diol solvate                                                                            |  |
| GINPOK<br>[Liautard, 2013] | C <sub>10</sub> H <sub>17</sub> NO <sub>3</sub> , H <sub>2</sub> O<br>1-hydroxy-2-methyloctahydroindolizinium-3-carboxylate monohydrate                                                                                                                                 |  |

|                                 |                                                                                                                                                                                         |                                                                                      |
|---------------------------------|-----------------------------------------------------------------------------------------------------------------------------------------------------------------------------------------|--------------------------------------------------------------------------------------|
| GINPUQ<br>[Liautard,<br>2013]   | C <sub>11</sub> H <sub>19</sub> NO <sub>3</sub> , H <sub>2</sub> O<br>1-hydroxy-2,8-dimethyloctahydroindolizinium-3-carboxylate<br>monohydrate                                          | 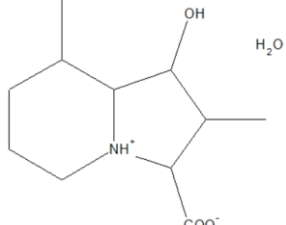   |
| HESHOD<br>[Peifer,<br>2003]     | C <sub>17</sub> H <sub>33</sub> NO <sub>4</sub> , H <sub>2</sub> O<br>(4 <i>R</i> )-4-hydroxy-1-((2 <i>S</i> )-2-hydroxydodecyl)- <i>L</i> -proline<br>monohydrate                      |    |
| HIDHIM<br>[Tarnavski<br>, 2007] | C <sub>11</sub> H <sub>19</sub> NO <sub>7</sub> , CH <sub>4</sub> O<br><i>N</i> -(1-deoxy-β- <i>D</i> -fructopyranos-1-yl)- <i>L</i> -proline methanol<br>solvate                       |    |
| HIDHOS<br>[Tarnavski<br>, 2007] | C <sub>11</sub> H <sub>19</sub> NO <sub>7</sub> , 2(H <sub>2</sub> O)<br><i>N</i> -(1-deoxy-β- <i>D</i> -fructopyranos-1-yl)- <i>L</i> -proline dihydrate                               |   |
| JIMVAD<br>[Mossine,<br>2007]    | C <sub>11</sub> H <sub>19</sub> NO <sub>7</sub> , H <sub>2</sub> O<br><i>N</i> -(1-deoxy-β- <i>D</i> -fructopyranose-1-yl)- <i>L</i> -proline monohydrate                               |  |
| JIMVEH<br>[Mossine,<br>2007]    | C <sub>11</sub> H <sub>19</sub> NO <sub>6</sub><br><i>N</i> -(1,6-dideoxy-α- <i>L</i> -fructofuranose-1-yl)- <i>L</i> -proline                                                          |  |
| LAKGUA<br>[Dong,<br>2005]       | C <sub>16</sub> H <sub>17</sub> NO <sub>3</sub><br><i>N</i> -(2-hydroxy-1-naphthylmethyl)-( <i>S</i> )-proline {(2 <i>S</i> )-1-(2-hydroxy-1-naphthylmethyl)pyrrolidinio-2-carboxylate} |  |

|                                       |                                                                                                                                                                                                                                                                                                                                                                                                                                                                                 |                                                                                      |
|---------------------------------------|---------------------------------------------------------------------------------------------------------------------------------------------------------------------------------------------------------------------------------------------------------------------------------------------------------------------------------------------------------------------------------------------------------------------------------------------------------------------------------|--------------------------------------------------------------------------------------|
| <p>QIJMAZ<br/>[Rajalakshmi, 2013]</p> | <p><math>C_{12}H_{15}NO_2</math><br/>1-benzylpyrrolidinium-2-carboxylate {<i>N</i>-benzyl-<i>L</i>-proline}</p>                                                                                                                                                                                                                                                                                                                                                                 | 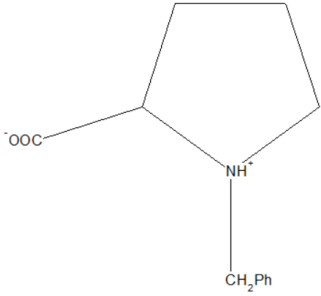    |
| <p>RASQUA<br/>[Liu, 2017]</p>         | <p><math>C_{32}H_{31}N_3O_5</math>, 0.5(<math>C_2H_5N</math>), 1.5(<math>H_2O</math>)<br/>(2<i>S</i>)-1-[(1<i>S</i>)-1-[8-(9H-fluoren-9-ylmethoxycarbonylamino)-4-methoxy-2-quinolyl]ethyl]pyrrolidinium-2-carboxylate acetonitrile solvate sesquihydrate</p>                                                                                                                                                                                                                   |    |
| <p>ROKXAQ<br/>[Toscano, 1997]</p>     | <p><math>C_6H_{11}NO_2</math>, <math>H_2O</math><br/><i>L</i>-1-methylproline monohydrate {hygric acid}</p>                                                                                                                                                                                                                                                                                                                                                                     |    |
| <p>RUSLUO<br/>[Barker, 2015]</p>      | <p><math>C_{52}H_{60}N_4O_{12}</math>, <math>C_4H_8O</math><br/>(25,26,27,28-tetrahydroxycalix(4)arene-5,11,17,23-tetramethylene)tetrakis(proline) tetrahydrofuran solvate</p>                                                                                                                                                                                                                                                                                                  |   |
| <p>UGUHOT<br/>[Yapp, 2002]</p>        | <p><math>C_6H_{11}NO_3</math><br/>4-hydroxy-<i>N</i>-methylproline</p>                                                                                                                                                                                                                                                                                                                                                                                                          |  |
| <p>URIHAF<br/>[Zhang, 2011]</p>       | <p><math>C_{52}H_{60}N_4O_{12}</math>, 11(<math>H_2O</math>)<br/>1-((11-((2-Carboxylatopyrrolidin-1-yl)methyl)-17-((2-carboxypyrrrolidinium-1-yl)methyl)-23-((2-carboxypyrrrolidin-1-yl)methyl)-25,26,27,28-tetrahydroxypentacyclo[19.3.1.13.7.19,13.115,19]octacosan-1(25),3(28),4,6,9(27),10,12,15(26),16,18,21,23-dodecaen-5-yl)methyl)pyrrolidinium-2-carboxylate undecahydrate {5,11,17,23-tetrakis(prolylmethyl)-25,26,27,28-tetrahydroxycalix(4)arene undecahydrate}</p> |  |

|                              |                                                                                                                                                                                                                                  |  |
|------------------------------|----------------------------------------------------------------------------------------------------------------------------------------------------------------------------------------------------------------------------------|--|
| VOTKIY<br>[Pereira,<br>1991] | $C_8H_{13}NO_5$<br>(1 <i>R</i> ,2 <i>R</i> ,3 <i>S</i> ,7 <i>S</i> ,7 <i>aR</i> )-3-carboxy-1,2,7-trihydroxypyrrolizidine<br>{7 <i>a</i> -epialexaflorine}                                                                       |  |
| WITZUX<br>[Salonen,<br>2019] | $C_{20}H_{31}NO_3$ , $C_{14}H_{22}O$<br>1-[(3,5-di- <i>t</i> -butyl-2-hydroxyphenyl)methyl]pyrrolidin-1-ium-2-<br>carboxylate 2,4-di- <i>t</i> -butylphenol                                                                      |  |
| XUFFEM<br>[Dank,<br>2020]    | $C_{16}H_{21}NO_6$ , $CHCl_3$ , $0.5(H_2O)$<br>1-[(3-acetyl-2-hydroxy-4,6-<br>dimethoxyphenyl)methyl]pyrrolidin-1-ium-2-carboxylate<br>chloroform solvate hemihydrate<br>{(-)-monophyllidin chloroform solvate hemihydrate}      |  |
| XUFFIQ<br>[Dank,<br>2020]    | $C_{16}H_{21}NO_6$ , $2.5(H_2O)$<br>1-[(3-acetyl-2-hydroxy-4,6-<br>dimethoxyphenyl)methyl]pyrrolidin-1-ium-2-carboxylate<br>hydrate {(-)-monophyllidin hydrate}                                                                  |  |
| XUFFOW<br>[Dank,<br>2020]    | $C_{16}H_{21}NO_6$ , $3(H_2O)$<br>1-[(3-acetyl-2-hydroxy-4,6-<br>dimethoxyphenyl)methyl]pyrrolidin-1-ium-2-carboxylate {(-)-<br>monophyllidin trihydrate}                                                                        |  |
| XUFGAJ<br>[Dank,<br>2020]    | $C_{16}H_{21}NO_6$ , $0.5(H_2O)$<br>1-[(3-acetyl-2-hydroxy-4,6-<br>dimethoxyphenyl)methyl]pyrrolidin-1-ium-2-carboxylate<br>unknown solvate hemihydrate {(-)-monophyllidin unknown<br>solvate hemihydrate}                       |  |
| XUFGEN<br>[Dank,<br>2020]    | $C_{16}H_{21}NO_6$ , $0.5(C_2H_3N)$ , $H_2O$<br>1-[(3-acetyl-2-hydroxy-4,6-<br>dimethoxyphenyl)methyl]pyrrolidin-1-ium-2-carboxylate<br>acetonitrile solvate monohydrate {(-)-monophyllidin<br>acetonitrile solvate monohydrate} |  |
| XUFGIR<br>[Dank,<br>2020]    | $C_{16}H_{21}NO_6$ , $C_2H_3N$<br>1-[(3-acetyl-2-hydroxy-4,6-<br>dimethoxyphenyl)methyl]pyrrolidin-1-ium-2-carboxylate<br>acetonitrile solvate {(-)-monophyllidin acetonitrile solvate}                                          |  |



|                                |                                                                                                                                                                                                                                                                                               |  |
|--------------------------------|-----------------------------------------------------------------------------------------------------------------------------------------------------------------------------------------------------------------------------------------------------------------------------------------------|--|
| YUCSOE<br>[Mattson,<br>1994]   | $C_{17}H_{24}N_2O_6$<br>(2 <i>S</i> ,5 <i>R</i> )- <i>N</i> -benzyl-2-carboxy-5-(((2-hydroxy-1,1-bis(hydroxymethyl)ethyl)amino)carbonyl)pyrrolidine                                                                                                                                           |  |
| ZEQSUM<br>[Milunovic,<br>2017] | $C_{15}H_{19}Cl_2FeN_4O_3S$<br>[1-{{3-{{2-(carbamothioyl)hydrazinylidene}methyl}-2-oxido-5-methylphenyl}methyl}-2-carboxypyrrolidin-1-iumato]- (dichloro)-iron(iii)                                                                                                                           |  |
| ZEQTAT<br>[Milunovic,<br>2017] | $C_{19}H_{25}Cl_2FeN_4O_3S$ , 0.125( $C_4H_{10}O$ ), 0.2( $CH_4O$ ), 0.063( $H_2O$ )<br>[2-carboxy-1-{{3-{{2-oxido-5-methyl-3-{{2-[pyrrolidine-1-(sulfanylidene)methyl}hydrazinylidene}methyl}phenyl}methyl}pyrrolidin-1-iumato]- (dichloro)-iron(iii) diethyl ether methanol solvate hydrate |  |
| ZEQTEX<br>[Milunovic,<br>2017] | $C_{22}H_{27}Cl_2FeN_4O_4S$ , 0.5( $CH_4O$ )<br>[2-carboxy-1-{{2-oxido-5-methyl-3-{{2-(phenylcarbamothioyl)hydrazinylidene}methyl}phenyl}methyl}pyrrolidin-1-iumato]-dichloro-methanol-iron(iii) methanol solvate                                                                             |  |
| ZEQTIB<br>[Milunovic,<br>2017] | $C_{28}H_{32}Cl_2FeN_5O_4S$ , $C_4H_{10}O$<br>(2-{{2-carboxylatepyrrolidinium-1-yl}methyl}-4-methyl-6-{{2-(naphthalen-1-ylcarbamothioyl)hydrazinylidene}methyl}phenolato)-dichloro-( <i>N,N</i> -dimethylformamide)-iron(iii) diethyl ether solvate                                           |  |

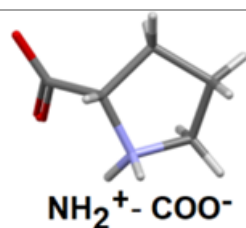

|                                 |                                                                                            |  |
|---------------------------------|--------------------------------------------------------------------------------------------|--|
| AHEMOR<br>[Myasnyanko,<br>2015] | $C_8H_{13}NO_3$<br>4-acetyl-4-methylpyrrolidinium-2-carboxylate {4-acetyl-4-methylproline} |  |
|---------------------------------|--------------------------------------------------------------------------------------------|--|

|                                 |                                                                                                                                                                                              |                                                                                      |
|---------------------------------|----------------------------------------------------------------------------------------------------------------------------------------------------------------------------------------------|--------------------------------------------------------------------------------------|
| AHLPRO<br>[Shamala, 1976]       | $C_5H_9NO_3, 2(H_2O)$<br>allo-4-hydroxy- <i>L</i> -proline dihydrate                                                                                                                         | 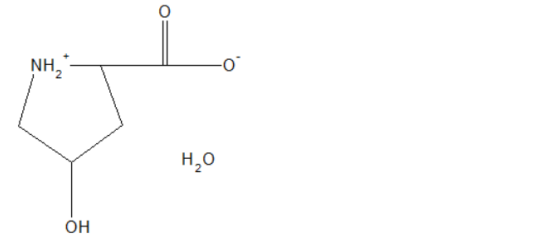    |
| ALKINA(01)<br>[Cruishank, 1959] | $C_{10}H_{15}NO_4$<br>allokainic acid                                                                                                                                                        |    |
| BEJNAI(01)<br>[Almansa, 2017]   | $C_{17}H_{14}F_3N_3O_2S, 2(C_5H_9NO_2)$<br>bis(pyrrolidinium-2-carboxylate) 4-(5-(4-methylphenyl)-3-(trifluoromethyl)-1H-pyrazol-1-yl)benzenesulfonamide {celecoxib bis( <i>L</i> -proline)} |    |
| BEXGUI<br>[Tilborg, 2013]       | $C_{14}H_{14}O_3, C_5H_9NO_2, H_2O$<br>pyrrolidinium-2-carboxylate 2-(6-methoxy-2-naphthyl)propanoic acid monohydrate { <i>L</i> -prolinium ( <i>R,S</i> )-naproxen monohydrate}             |   |
| BEYTUW<br>[Tilborg, 2013]       | $C_{14}H_{14}O_3, C_5H_9NO_2, H_2O$<br>pyrrolidinium-2-carboxylate 2-(6-methoxynaphthalen-2-yl)propanoic acid monohydrate { <i>D,L</i> -prolinium <i>R,S</i> -naproxen monohydrate}          |  |
| BOCJEL [Foletti, 2019]          | $C_{16}H_{17}NO_2$<br>4-[(naphthalen-2-yl)methyl]pyrrolidin-1-ium-2-carboxylate                                                                                                              |  |
| BOYTIS<br>[Oszbach, 1983]       | $C_{24}H_{33}NO$<br>2-methyl-9-phenyl-4a-pyrrolidin-1-yl-1,2,3,4,4a,5,6,7,8,9a-decahydroxanthene                                                                                             |  |

|                                      |                                                                                                                                                                                                                                                                                                                                                                                                                                                                                                                                                                      |                                                                                      |
|--------------------------------------|----------------------------------------------------------------------------------------------------------------------------------------------------------------------------------------------------------------------------------------------------------------------------------------------------------------------------------------------------------------------------------------------------------------------------------------------------------------------------------------------------------------------------------------------------------------------|--------------------------------------------------------------------------------------|
| <p>CADKOJ<br/>[Gharzaryan, 2011]</p> | <p><math>C_5H_{10}NO_2^+</math>, <math>C_5H_9NO_2</math>, <math>BF_4^-</math><br/><i>L</i>-prolinium <i>L</i>-proline tetrafluoroborate</p>                                                                                                                                                                                                                                                                                                                                                                                                                          | 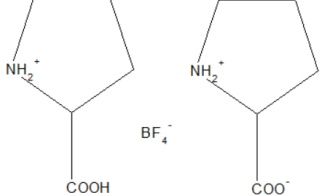   |
| <p>CADLIE<br/>[Gharzaryan, 2011]</p> | <p><math>C_5H_9NO_2</math>, <math>Cl^-</math>, <math>C_5H_{10}NO_2^+</math><br/><i>L</i>-proline <i>L</i>-prolinium chloride</p>                                                                                                                                                                                                                                                                                                                                                                                                                                     |    |
| <p>CENZUT<br/>[Fujisawa, 2018]</p>   | <p><math>C_{36}H_{40}O_8</math>, <math>C_5H_9NO_2</math>, <math>2(CH_4O)</math>, <math>3.5(H_2O)</math><br/>pyrrolidin-1-ium-2-carboxylate 2,8,14,20-tetraethylpentacyclo[19.3.1.13.7.19,13.115,19]octacos-1(25),3(28),4,6,9(27),10,12,15(26),16,18,21,23-dodecaene-4,6,10,12,16,18,22,24-octol methanol solvate hydrate {<i>C</i>-ethyl-calix(4)resorcinarene <i>D,L</i>-proline clathrate methanol solvate hydrate}</p>                                                                                                                                            |    |
| <p>CEPBAD<br/>[Fujisawa, 2018]</p>   | <p><math>C_{36}H_{40}O_{12}</math>, <math>C_5H_9NO_2</math>, <math>C_2H_6O</math>, <math>5(H_2O)</math><br/>pyrrolidin-1-ium-2-carboxylate 2,8,14,20-tetraethylpentacyclo[19.3.1.13.7.19,13.115,19]octacos-1(25),3(28),4,6,9(27),10,12,15(26),16,18,21,23-dodecaene-4,5,6,10,11,12,16,17,18,22,23,24-dodecol ethanol solvate pentahydrate {<i>C</i>-ethyl-calix(4)pyrogallolarene <i>L</i>-proline clathrate ethanol solvate decahydrate; 2,8,14,20-tetraethyl-4,5,6,10,11,12,16,17,18,22,23,24-dodecahydroxycalix(4)arene proline ethanol solvate pentahydrate}</p> |   |
| <p>CIDBOH<br/>[Athimoolam, 2007]</p> | <p><math>C_7H_7NO_2</math>, <math>2(C_5H_9NO_2)</math>, <math>H_2O</math><br/>4-aminobenzoic acid bis(<i>L</i>-proline) monohydrate</p>                                                                                                                                                                                                                                                                                                                                                                                                                              |  |
| <p>CIPVUU [Bien, 2009]</p>           | <p><math>C_{21}H_{25}ClO_6</math>, <math>2(C_5H_9NO_2)</math><br/>bis(2-carboxypyrrolidinium) 2-(4-chloro-3-(4-ethoxybenzyl)phenyl)-6-(hydroxymethyl)tetrahydro-2H-pyran-3,4,5-triol {dapagliflozin bis(proline)}</p>                                                                                                                                                                                                                                                                                                                                                |  |
| <p>CIPZIM [Bien, 2009]</p>           | <p><math>C_{21}H_{25}ClO_6</math>, <math>C_5H_9NO_2</math><br/>2-(4-chloro-3-(4-ethoxybenzyl)phenyl)-6-(hydroxymethyl)tetrahydro-2H-pyran-3,4,5-triol <i>L</i>-proline {dapagliflozin <i>L</i>-proline}</p>                                                                                                                                                                                                                                                                                                                                                          |  |
| <p>CIRFEQ [Bien, 2009]</p>           | <p><math>C_{21}H_{25}ClO_6</math>, <math>C_5H_9NO_2</math>, <math>0.5(H_2O)</math><br/>2-(4-chloro-3-(4-ethoxybenzyl)phenyl)-6-(hydroxymethyl)tetrahydro-2H-pyran-3,4,5-triol <i>L</i>-proline hemihydrate {dapagliflozin <i>L</i>-proline hemihydrate}</p>                                                                                                                                                                                                                                                                                                          |  |

|                                         |                                                                                                                                                                            |                                                                                      |
|-----------------------------------------|----------------------------------------------------------------------------------------------------------------------------------------------------------------------------|--------------------------------------------------------------------------------------|
| <p>COGKOA<br/>[Mohana, 2014]</p>        | <p><math>C_5H_9NO_3</math>, <math>C_4H_6O_6</math><br/>4-hydroxypyrrolidinium-2-carboxylate 2,3-dihydroxysuccinate {4-hydroxy-<i>L</i>-proline <i>L</i>-tartaric acid}</p> | 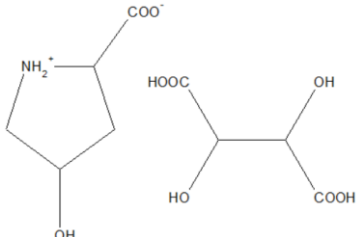   |
| <p>CXPROL<br/>[Dupont, 1978]</p>        | <p><math>C_6H_9NO_4</math><br/><i>trans</i>-4-carboxy-<i>L</i>-proline</p>                                                                                                 |    |
| <p>CUDCAG [Best, 2009]</p>              | <p><math>C_6H_{11}NO_5</math><br/>(2<i>S</i>,3<i>R</i>,4<i>R</i>,5<i>R</i>)-3,4-dihydroxy-5-(hydroxymethyl)pyrrolidine-2-carboxylic acid</p>                               |    |
| <p>DHPROL10<br/>[Karle, 1970]</p>       | <p><math>C_5H_9NO_4</math><br/>2,3-cis-3,4-trans-3,4-dihydroxy-<i>L</i>-proline</p>                                                                                        |   |
| <p>DIDKXIA<br/>[Meesakul, 2020]</p>     | <p><math>C_{13}H_{10}O_2</math><br/>6-(2-phenylethenyl)-2H-pyran-2-one {(<i>E</i>)-6-styrylpyran-2-one}</p>                                                                |  |
| <p>DIDXOG<br/>[Davies, 2018]</p>        | <p><math>C_5H_9NO_3</math>, <math>H_2O</math><br/>3-hydroxypyrrolidin-1-ium-2-carboxylate monohydrate</p>                                                                  |  |
| <p>DIZXOB<br/>[Pandey, 2014]</p>        | <p><math>C_{12}H_{12}N_2O_6</math>, <math>H_2O</math><br/>4-((4-nitrobenzoyl)oxy)pyrrolidinium-2-carboxylate monohydrate</p>                                               |  |
| <p>DLPROM(01, 02, 03) [Fraig, 2002]</p> | <p><math>C_5H_9NO_2</math>, <math>H_2O</math><br/><i>D,L</i>-proline monohydrate</p>                                                                                       |  |

|                                       |                                                                                                                                                                                                                                                                                     |                                                                                      |
|---------------------------------------|-------------------------------------------------------------------------------------------------------------------------------------------------------------------------------------------------------------------------------------------------------------------------------------|--------------------------------------------------------------------------------------|
| <p>DUKJUP<br/>[Muramulla, 2009]</p>   | <p><math>C_{29}H_{28}F_6N_4OS</math>, <math>C_5H_9NO_2</math>, <math>CH_4O</math><br/>(<i>S,R,R,R,S,S</i>)-1-[3,5-bis(trifluoromethyl)phenyl]-3-[(5-ethenyl-1-azabicyclo[2.2.2]octan-2-yl)(6-methoxyquinolin-4-yl)methyl]thiourea <i>L</i>-proline methanol solvate</p>             | 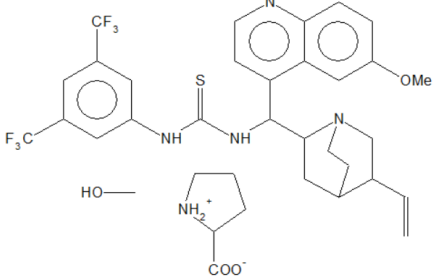   |
| <p>DUMBUK(01)<br/>[Pinalli, 2016]</p> | <p><math>C_{36}H_{36}O_{12}P_4</math>, <math>C_5H_9NO_3</math>, <math>3.55(C_2H_3F_3O)</math><br/>5,11,17,23-tetramethyl-4,24:6,10:12,16:18,22-O,O'-tetrakis(methyl(oxo)phosphanidene)calix[4]resorcinarene 4-hydroxypyrrolidinium-2-carboxylate 2,2,2-trifluoroethanol solvate</p> |    |
| <p>EJEPOA [He, 2016]</p>              | <p><math>C_{15}H_{10}O_6</math>, <math>2(C_5H_9NO_2)</math><br/>3,5,7-trihydroxy-2-(4-hydroxyphenyl)-4H-chromen-4-one bis(pyrrolidinium-2-carboxylate) {kaempferol bis(<i>L</i>-proline)}</p>                                                                                       |    |
| <p>EJEPUG [He, 2016]</p>              | <p><math>C_{15}H_{10}O_6</math>, <math>C_5H_9NO_2</math><br/>2-(3,4-dihydroxyphenyl)-5,7-dihydroxy-4H-chromen-4-one pyrrolidinium-2-carboxylate {luteolin <i>L</i>-proline}</p>                                                                                                     |   |
| <p>EJEQAN<br/>[Hongyan, 2016]</p>     | <p><math>C_{15}H_{10}O_4</math>, <math>C_5H_9NO_2</math><br/>5,7-dihydroxy-2-phenyl-4H-chromen-4-one pyrrolidinium-2-carboxylate {chrysin <i>L</i>-proline}</p>                                                                                                                     |  |
| <p>EJEQER [He, 2016]</p>              | <p><math>C_{15}H_{10}O_5</math>, <math>2(C_5H_9NO_2)</math><br/>5,7-dihydroxy-3-(4-hydroxyphenyl)-4H-chromen-4-one bis(pyrrolidinium-2-carboxylate) {genistein bis(<i>L</i>-proline)}</p>                                                                                           |  |
| <p>EJEQIV [He, 2016]</p>              | <p><math>C_{15}H_{10}O_6</math>, <math>C_5H_9NO_2</math><br/>pyrrolidinium-2-carboxylate 2-(3,4-dihydroxyphenyl)-5,7-dihydroxy-4H-chromen-4-one {luteolin <i>D</i>-proline}</p>                                                                                                     |  |
| <p>EJEQOB [He, 2016]</p>              | <p><math>C_{15}H_{10}O_4</math>, <math>C_5H_9NO_2</math><br/>pyrrolidinium-2-carboxylate 5,7-dihydroxy-2-phenyl-4H-chromen-4-one {chrysin <i>D</i>-proline}</p>                                                                                                                     |  |

|                           |                                                                                                                                                                                                                                                  |                                                                                      |
|---------------------------|--------------------------------------------------------------------------------------------------------------------------------------------------------------------------------------------------------------------------------------------------|--------------------------------------------------------------------------------------|
| EJEQUH [He, 2016]         | C <sub>15</sub> H <sub>10</sub> O <sub>5</sub> , 2(C <sub>5</sub> H <sub>9</sub> NO <sub>2</sub> )<br>5,7-dihydroxy-3-(4-hydroxyphenyl)-4H-chromen-4-one bis(pyrrolidinium-2-carboxylate) {genistein bis( <i>D</i> -proline)}                    | 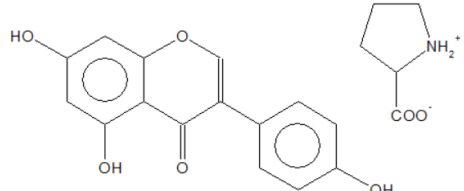   |
| EJERAO [He, 2016]         | C <sub>15</sub> H <sub>10</sub> O <sub>7</sub> , 2(C <sub>5</sub> H <sub>9</sub> NO <sub>2</sub> )<br>2-(3,4-dihydroxyphenyl)-3,5,7-trihydroxy-4H-chromen-4-one bis(pyrrolidinium-2-carboxylate) {quercetin bis( <i>D</i> -proline)}             |    |
| EJERES [He, 2016]         | C <sub>15</sub> H <sub>10</sub> O <sub>7</sub> , 2(C <sub>5</sub> H <sub>9</sub> NO <sub>2</sub> )<br>2-(3,4-dihydroxyphenyl)-3,5,7-trihydroxy-4H-chromen-4-one bis(pyrrolidinium-2-carboxylate) {quercetin bis( <i>L</i> -proline)}             |    |
| EJERIW [He, 2016]         | C <sub>15</sub> H <sub>10</sub> O <sub>6</sub> , 2(C <sub>5</sub> H <sub>9</sub> NO <sub>2</sub> )<br>3,5,7-trihydroxy-2-(4-hydroxyphenyl)-4H-chromen-4-one bis(pyrrolidinium-2-carboxylate) {kaempferol bis( <i>D</i> -proline)}                |   |
| EQIHUI [Mykhailiuk, 2011] | C <sub>6</sub> H <sub>10</sub> FNO <sub>2</sub> , H <sub>2</sub> O<br>5-(fluoromethyl)pyrrolidinio-2-carboxylate monohydrate                                                                                                                     |  |
| FEVZOX [Tilborg, 2013]    | C <sub>14</sub> H <sub>14</sub> O <sub>3</sub> , C <sub>5</sub> H <sub>9</sub> NO <sub>2</sub><br>(2 <i>S</i> )-2-(6-methoxynaphthalen-2-yl)propanoic acid ( <i>R</i> )-pyrrolidinium-2-carboxylate { <i>D</i> -proline <i>S</i> -naproxen}      |  |
| FEVZUD [Tilborg, 2013]    | C <sub>14</sub> H <sub>14</sub> O <sub>3</sub> , C <sub>5</sub> H <sub>9</sub> NO <sub>2</sub><br>(2 <i>S</i> )-2-(6-methoxynaphthalen-2-yl)propanoic acid ( <i>S</i> )-pyrrolidinium-2-carboxylate {( <i>L</i> )-proline ( <i>S</i> -naproxen)} |  |
| GAYCEO [Krapcho, 1988]    | C <sub>11</sub> H <sub>13</sub> NO <sub>2</sub><br>trans-4-phenyl- <i>L</i> -proline                                                                                                                                                             |  |

|                                  |                                                                                                                                                           |                                                                                      |
|----------------------------------|-----------------------------------------------------------------------------------------------------------------------------------------------------------|--------------------------------------------------------------------------------------|
| GEVMOK<br>[Hanessian, 2006]      | $C_6H_9NO_2$<br>4,5-methano- <i>L</i> -proline                                                                                                            | 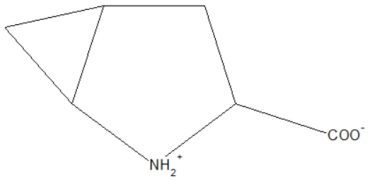   |
| GIHSAT<br>[Tilborg, 2013]        | $2(C_5H_9NO_2)$ , $C_4H_4O_4$<br>bis( <i>rac</i> -pyrrolidinium-2-carboxylate) (2 <i>E</i> )-but-2-enedioic acid {bis( <i>D,L</i> -proline) fumaric acid} |    |
| GIHSOH<br>[Tilborg, 2013]        | $2(C_5H_9NO_2)$ , $C_4H_4O_4$<br>bis( <i>S</i> -pyrrolidinium-2-carboxylate) (2 <i>E</i> )-but-2-enedioic acid { bis( <i>L</i> -proline) fumaric acid }   |    |
| GIHSUN<br>[Tilborg, 2013]        | $2(C_5H_9NO_2)$ , $C_4H_4O_4$<br>bis( <i>R</i> -pyrrolidinium-2-carboxylate) (2 <i>E</i> )-but-2-enedioic acid { bis( <i>D</i> -proline) fumaric acid }   |    |
| GIVROS<br>[Ramanathan, 1998]     | $C_{18}H_{14}O_4$ , $C_5H_9NO_2$<br>(11 <i>R</i> ,12 <i>R</i> )-(+)-9,10-dihydro-9,10-ethanoanthracene-11,12-dicarboxylic acid ( <i>S</i> )-proline       |   |
| GULCUM [Cini, 2009]              | $C_{10}H_{19}NO_2$<br>(5 <i>R</i> )- <i>cis</i> -5-(3-methylbutyl)pyrrolidinium-2-carboxylate                                                             |  |
| HOPROL(01,12)<br>[Koetzke, 1973] | $C_5H_9NO_3$<br>4-hydroxy- <i>L</i> -proline                                                                                                              |  |
| HXMPRO<br>[Koyama, 1974]         | $C_6H_{11}NO_3$<br>3-hydroxy-4-methyl-proline                                                                                                             |  |
| IDINAK<br>[Pandiarajan, 2002]    | $C_5H_9NO_2$ , $C_5H_{10}NO_2^+$ , $ClO_4^-$<br>bis( <i>L</i> -proline) hydrogen perchlorate                                                              |  |

|                                     |                                                                                                                                                |                                                                                       |
|-------------------------------------|------------------------------------------------------------------------------------------------------------------------------------------------|---------------------------------------------------------------------------------------|
| <p>IHUMAZ<br/>[Timofeeva, 2003]</p> | <p><math>C_{10}H_6N_2O</math>, <math>C_5H_9NO_2</math><br/>1,1-dicyano-2-(4-hydroxyphenyl)ethene <i>L</i>-proline</p>                          | 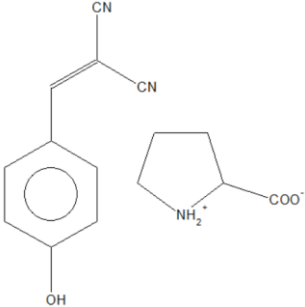    |
| <p>JOFGOD [Song, 2019]</p>          | <p><math>C_4H_6N_4O_3S_2</math>, <math>C_5H_9NO_2</math><br/>pyrrolidin-1-ium-2-carboxylate N-(5-sulfamoyl-1,3,4-thiadiazol-2-yl)acetamide</p> |     |
| <p>JOKLEC<br/>[Bedekar, 2014]</p>   | <p><math>C_{20}H_{14}O_4</math>, <math>2(C_5H_9NO_2)</math><br/>pyrrolidinium-2-carboxylate 1,1'-binaphthalene-2,2',7,7'-tetrol</p>            |     |
| <p>KECJIM<br/>[Rogowska, 2006]</p>  | <p><math>C_8H_{11}BO_3</math>, <math>C_5H_9NO_2</math><br/><i>L</i>-proline 4-ethoxyphenylboronic acid</p>                                     |    |
| <p>KEFWAU<br/>[Maverick, 1989]</p>  | <p><math>C_{20}H_{20}N_2NiO_2</math><br/>trans-bis(3-amino-1-phenylbut-2-en-1-onato-N,O)-nickel(ii)</p>                                        |   |
| <p>KIJFOB [Liang, 2018]</p>         | <p><math>C_{10}H_{15}NO_4</math>, <math>H_2O</math><br/>3-(carboxymethyl)-4-(prop-1-en-2-yl)pyrrolidin-1-ium-2-carboxylate monohydrate</p>     |  |
| <p>LABZUJ<br/>[Sridhar, 1993]</p>   | <p><math>C_5H_9NO_2</math>, <math>0.5(C_4H_6O_4)</math><br/><i>D,L</i>-proline hemisuccinic acid</p>                                           |   |



|                                  |                                                                                                                                                                        |  |
|----------------------------------|------------------------------------------------------------------------------------------------------------------------------------------------------------------------|--|
| LEGBEG<br>[Hobart, 2012]         | $C_5H_8FNO_2$<br>(2 <i>S</i> ,4 <i>R</i> )-4-Fluoropyrrolidinium-2-carboxylate {trans-4-fluoroproline}                                                                 |  |
| LIRSEN [Surov, 2018]             | $C_{13}H_9F_3N_2O_2$ , $C_5H_9NO_2$<br>2-((3-(trifluoromethyl)phenyl)amino)pyridine-3-carboxylic acid pyrrolidin-1-ium-2-carboxylate {niflumic acid <i>L</i> -proline} |  |
| LOXCOS<br>[Hernandez, 2015]      | $C_6H_8B_2O_4$ , $2(C_5H_9NO_2)$<br>bis(pyrrolidinium-2-carboxylate) 1,4-phenylenediboric acid                                                                         |  |
| LOXDIN<br>[Hernandez, 2015]      | $C_5H_9NO_2$ , $C_6H_7BO_2$ , $H_2O$<br>pyrrolidinium-2-carboxylate phenylboronic acid monohydrate                                                                     |  |
| LOXHAIJ(01)<br>[Hernandez, 2015] | $C_5H_9NO_2$ , $C_6H_6BIO_2$<br><i>L</i> -proline (4-iodophenyl)boronic acid                                                                                           |  |
| LOXHIR<br>[Hernandez, 2015]      | $C_5H_9NO_2$ , $C_6H_7BO_2$<br><i>L</i> -proline phenylboronic acid                                                                                                    |  |
| LUDFOF<br>[Pandiarajan, 2002]    | $C_5H_9NO_2$ , $C_5H_{10}NO_2^+$ , $NO_3^-$<br>bis( <i>L</i> -proline) hydrogen nitrate                                                                                |  |
| MEPROL [Bell, 1980]              | $C_6H_9NO_2$ , $H_2O$<br>2,4-methanoproline monohydrate {2-carboxy-2,4-methanopyrrolidine monohydrate}                                                                 |  |
| MPROLT<br>[Fujimoto, 1971]       | $C_6H_9NO_2$ , $H_2O$<br>trans-3,4-methylene- <i>L</i> -proline monohydrate                                                                                            |  |

|                                     |                                                                                                                                                                                                                                                                                                 |                                                                                      |
|-------------------------------------|-------------------------------------------------------------------------------------------------------------------------------------------------------------------------------------------------------------------------------------------------------------------------------------------------|--------------------------------------------------------------------------------------|
| <p>NAZGIG<br/>[Desphande, 2012]</p> | <p><math>C_{21}H_{26}O_5</math>, <math>4(H_2O)</math>, <math>2(C_5H_9NO_2)</math><br/>(2<i>S</i>,3<i>R</i>,4<i>R</i>,5<i>S</i>,6<i>R</i>)-2-(3-(4-ethylbenzyl)-phenyl)-6-hydroxymethyl-tetrahydro-2H-pyran-3,4,5-triol bis(<i>L</i>-proline) tetrahydrate</p>                                   | 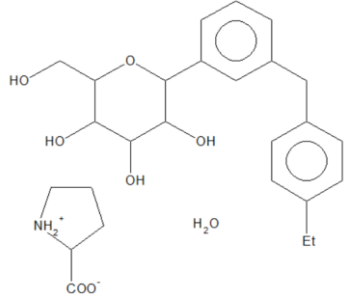    |
| <p>NAZGOM<br/>[Desphande, 2012]</p> | <p><math>C_{21}H_{26}O_5</math>, <math>H_2O</math>, <math>2(C_5H_9NO_2)</math>, <math>C_2H_6O</math><br/>(2<i>S</i>,3<i>R</i>,4<i>R</i>,5<i>S</i>,6<i>R</i>)-2-(3-(4-ethylbenzyl)-phenyl)-6-hydroxymethyl-tetrahydro-2H-pyran-3,4,5-triol bis(<i>L</i>-proline) ethanol solvate monohydrate</p> |    |
| <p>NAZGUS<br/>[Desphande, 2012]</p> | <p><math>C_{21}H_{26}O_5</math>, <math>C_5H_9NO_2</math><br/>(2<i>S</i>,3<i>R</i>,4<i>R</i>,5<i>S</i>,6<i>R</i>)-2-(3-(4-ethylbenzyl)-phenyl)-6-hydroxymethyl-tetrahydro-2H-pyran-3,4,5-triol <i>L</i>-proline</p>                                                                              |    |
| <p>NEGBUW<br/>[Baldwin, 1997]</p>   | <p><math>C_{14}H_{17}NO_5</math><br/>(2<i>S</i>,3<i>S</i>,4<i>S</i>)-3-carboxymethyl-4-(2-methoxyphenyl)pyrrolidine-2-carboxylic acid</p>                                                                                                                                                       |  |
| <p>NISVOA(01)<br/>[Hu, 2012]</p>    | <p><math>2(C_{20}H_{14}O_2)</math>, <math>C_5H_9NO_2</math><br/>(<i>S</i>)-(-)-bis(1,1'-binaphth-2,2'-diol) (<i>S</i>)-proline</p>                                                                                                                                                              |  |
| <p>NOHTIP<br/>[Pangerl, 2014]</p>   | <p><math>C_{14}H_{19}NO_3</math><br/>4-((benzyloxy)methyl)-5-methylpyrrolidinium-2-carboxylate</p>                                                                                                                                                                                              |  |

|                           |                                                                                                                                                                                                                                             |                                                                                      |
|---------------------------|---------------------------------------------------------------------------------------------------------------------------------------------------------------------------------------------------------------------------------------------|--------------------------------------------------------------------------------------|
| OLIZAL [Qu, 2011]         | $2(C_5H_9NO_2)$ , $2(C_5H_{10}NO_2^+)$ , $2(C_{12}H_4N_4^-)$ , $C_{12}H_4N_4$<br>bis(2-carboxypyrrolidinium) bis(7,7,8,8-tetracyanoquinodimethanide)<br>bis(tetracyanoquinodimethane) pyrrolidinium-2-carboxylate                           | 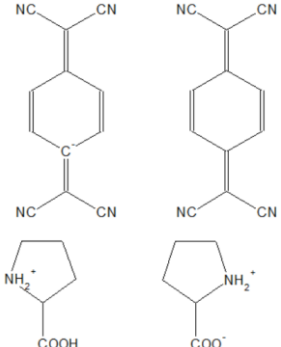    |
| PEBZOO [He, 2017]         | $C_{14}H_{12}O_3$ , $C_5H_9NO_2$<br>pyrrolidinium-2-carboxylate 5-(2-(4-hydroxyphenyl)vinyl)benzene-1,3-diol { <i>L</i> -proline resveratrol}                                                                                               |    |
| PEBZUU [He, 2017]         | $C_{14}H_{12}O_3$ , $2(C_5H_9NO_2)$<br>bis(pyrrolidinium-2-carboxylate) 5-(2-(4-hydroxyphenyl)vinyl)benzene-1,3-diol {bis( <i>L</i> -proline) resveratrol}                                                                                  |   |
| PEGZAE [Venkatesan, 2013] | $C_{10}H_{18}Br_2N_2O_4Zn$<br>dibromo-(bis(2-(carboxy)pyrrolidiniumato))-zinc(ii)                                                                                                                                                           |  |
| POKHAY10 [Fu, 1997]       | $C_{23}H_{28}O_3$ , $C_5H_9NO_2$<br>4-(2,4,6-tri-isopropylbenzoyl)benzoic acid proline                                                                                                                                                      |  |
| PROLIN(01-05)             | <i>See scheme 1, 2</i>                                                                                                                                                                                                                      |                                                                                      |
| QANRUT(01)                | <i>See scheme 1, 2</i>                                                                                                                                                                                                                      |                                                                                      |
| RUWGEV [Janczak, 1997]    | $C_5H_9NO_2$ , $H_2O$<br><i>L</i> -proline monohydrate                                                                                                                                                                                      |  |
| QILZET [Tumanova, 2018]   | $C_{14}H_{14}O_3$ , $2(C_5H_9NO_2)$<br>(2 <i>S</i> )-2-(6-methoxynaphthalen-2-yl)propanoic acid (2 <i>R</i> )-pyrrolidin-1-ium-2-carboxylate (2 <i>S</i> )-pyrrolidin-1-ium-2-carboxylate {( <i>S</i> )-naproxen bis( <i>D,L</i> -proline)} |  |

|                                    |                                                                                                                                                                                                                                                                                                                     |  |
|------------------------------------|---------------------------------------------------------------------------------------------------------------------------------------------------------------------------------------------------------------------------------------------------------------------------------------------------------------------|--|
| QILZIX<br>[Tumanova,<br>2018]      | $C_{14}H_{14}O_3$ , $2(C_5H_9NO_2)$<br>(2 <i>S</i> )-2-(6-methoxynaphthalen-2-yl)propanoic acid<br>bis((2 <i>S</i> )-pyrrolidin-1-ium-2-carboxylate) { ( <i>S</i> )-naproxen<br>bis( <i>L</i> -proline) }                                                                                                           |  |
| QILZOD<br>[Tumanova,<br>2018]      | $C_{14}H_{14}O_3$ , $C_5H_9NO_2$<br>bis((2 <i>S</i> )-2-(6-methoxynaphthalen-2-yl)propanoic acid)<br>(2 <i>R</i> )-pyrrolidin-1-ium-2-carboxylate (2 <i>S</i> )-pyrrolidin-1-<br>ium-2-carboxylate { ( <i>S</i> )-naproxen ( <i>D,L</i> )-proline }                                                                 |  |
| QILZUJ<br>[Tumanova,<br>2018]      | $C_{14}H_{14}O_3$ , $C_5H_9NO_2$ , $0.5(CH_4O)$<br>(2 <i>R</i> )-2-(6-methoxynaphthalen-2-yl)propanoic acid (2 <i>S</i> )-<br>2-(6-methoxynaphthalen-2-yl)propanoic acid bis((2 <i>R</i> )-<br>pyrrolidine-2-carboxylic acid) methanol solvate { ( <i>RS</i> )-<br>naproxen ( <i>D</i> )-proline methanol solvate } |  |
| QIMBAS(01)<br>[Tumanova,<br>2018]  | $C_{14}H_{14}O_3$ , $C_5H_9NO_2$<br>(2 <i>R</i> )-2-(6-methoxynaphthalen-2-yl)propanoic acid (2 <i>S</i> )-<br>2-(6-methoxynaphthalen-2-yl)propanoic acid bis((2 <i>R</i> )-<br>pyrrolidin-1-ium-2-carboxylate) { ( <i>R,S</i> )-naproxen ( <i>D</i> -<br>proline) }                                                |  |
| QIMBEW(01)<br>[Tumanova,<br>2018]  | $C_{14}H_{14}O_3$ , $C_5H_9NO_2$<br>(2 <i>R</i> )-2-(6-methoxynaphthalen-2-yl)propanoic acid (2 <i>S</i> )-<br>2-(6-methoxynaphthalen-2-yl)propanoic acid (2 <i>R</i> )-<br>pyrrolidin-1-ium-2-carboxylate (2 <i>S</i> )-pyrrolidin-1-ium-2-<br>carboxylate { ( <i>RS</i> )-naproxen ( <i>DL</i> )-proline }        |  |
| QIMBIA<br>[Tumanova,<br>2018]      | $C_{14}H_{14}O_3$ , $C_5H_9NO_2$ , $H_2O$<br>bis((2 <i>S</i> )-2-(6-methoxynaphthalen-2-yl)propanoic acid)<br>(2 <i>R</i> )-pyrrolidin-1-ium-2-carboxylate (2 <i>S</i> )-pyrrolidin-1-<br>ium-2-carboxylate monohydrate { ( <i>S</i> )-naproxen ( <i>DL</i> )-<br>proline monohydrate }                             |  |
| QIMBOG<br>[Tumanova,<br>2018]      | $C_{14}H_{14}O_3$ , $2(C_5H_9NO_2)$<br>(2 <i>R</i> )-2-(6-methoxynaphthalen-2-yl)propanoic acid (2 <i>S</i> )-<br>2-(6-methoxynaphthalen-2-yl)propanoic acid<br>tetrakis((2 <i>S</i> )-pyrrolidine-2-carboxylic acid) { ( <i>RS</i> )-<br>naproxen bis( <i>L</i> -proline) }                                        |  |
| QIMCOH<br>[Tumanova,<br>2018]      | $C_{14}H_{14}O_3$ , $C_5H_9NO_2$<br>(2 <i>R</i> )-2-(6-methoxynaphthalen-2-yl)propanoic acid (2 <i>S</i> )-<br>2-(6-methoxynaphthalen-2-yl)propanoic acid bis((2 <i>S</i> )-<br>pyrrolidin-1-ium-2-carboxylate) { ( <i>RS</i> )-naproxen ( <i>L</i> -<br>proline) }                                                 |  |
| QIMCUN<br>[Tumanova,<br>2018]      | $2(C_{14}H_{14}O_3)$ , $3(C_5H_9NO_2)$<br>bis((2 <i>S</i> )-2-(6-methoxynaphthalen-2-yl)propanoic acid)<br>tris((2 <i>S</i> )-pyrrolidin-1-ium-2-carboxylate) { bis(( <i>S</i> )-<br>naproxen) tris(( <i>L</i> )-proline) }                                                                                         |  |
| QIRNUC<br>[Sowmya, 2013]           | $C_5H_9NO_2$ , $2(C_6H_5NO_3)$<br>pyrrolidinium-2-carboxylate bis(4-nitrophenol)                                                                                                                                                                                                                                    |  |
| RETNEM(01)<br>[Nugrahani,<br>2018] | $C_{14}H_{11}Cl_2NO_2$ , $C_5H_9NO_2$<br>2-(2-(2,6-dichloroanilino)phenyl)acetic acid (2 <i>S</i> )-<br>pyrrolidinium-2-carboxylate { diclofenac <i>L</i> -proline }                                                                                                                                                |  |

|                               |                                                                                                                                                                                                                                                                                                                                                                              |                                                                                      |
|-------------------------------|------------------------------------------------------------------------------------------------------------------------------------------------------------------------------------------------------------------------------------------------------------------------------------------------------------------------------------------------------------------------------|--------------------------------------------------------------------------------------|
| RUWGEV<br>[Janczak, 1997]     | $C_5H_9NO_2, H_2O$<br><i>L</i> -proline monohydrate                                                                                                                                                                                                                                                                                                                          | 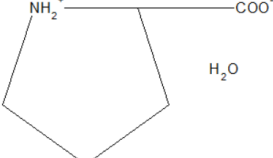   |
| TIWZUV<br>[Kumar, 2008]       | $C_{15}H_{17}NO_5, H_2O$<br>8,9-dimethoxy-5-oxo-2,3,5,6-tetrahydropyrrolo[2,1-a]isoquinoline-10b(1H)-carboxylic acid monohydrate                                                                                                                                                                                                                                             |    |
| TOSKOD<br>[Priya, 2015]       | $C_{20}H_{21}N_3O_6S$<br>1-((2-((2-acetamidobenzoyl)amino)phenyl)sulfonyl)proline                                                                                                                                                                                                                                                                                            |    |
| TPHPRO13 [Lu, 2018]           | $C_{17}H_{22}N_2O_6S, H_2O$<br>tosyl- <i>L</i> -prolyl- <i>L</i> -hydroxyproline monohydrate                                                                                                                                                                                                                                                                                 |   |
| TUGWAV(01)<br>[Pinalli, 2016] | $C_{36}H_{36}O_{12}P_4, C_5H_9NO_2, 2.6(C_2H_3F_3O)$<br>pyrrolidinium-2-carboxylate 5,11,17,23-tetramethyl-6,10:12,16:18,22:24,4-tetrakis(methylphosphonato-O,O')calix(4)arene 2,2,2-trifluoroethanol solvate {pyrrolidinium-2-carboxylate 5,11,17,23-tetramethyl-6,10:12,16:18,22:24,4-O,O'-tetrakis(methylphosphoryl)calix(4)resorcinarene 2,2,2-trifluoroethanol solvate} |  |
| UPIKUB<br>[Scholmeyer, 2016]  | $C_5H_9NO_3$<br>4-hydroxypyrrolidinium-2-carboxylate<br>{4-hydroxyproline}                                                                                                                                                                                                                                                                                                   |  |
| VESCUS<br>[Marchand, 2006]    | $C_{12}H_{12}O_4, C_5H_9NO_2$<br>pentacyclo(5.3.0.02,5.03,9.04,8)decane-2,5-dicarboxylic acid proline                                                                                                                                                                                                                                                                        |  |

|                                            |                                                                                                                                                                                                                                                                               |                                                                                      |
|--------------------------------------------|-------------------------------------------------------------------------------------------------------------------------------------------------------------------------------------------------------------------------------------------------------------------------------|--------------------------------------------------------------------------------------|
| <p>VEVKEP(01)<br/>[Tumanova,<br/>2018]</p> | <p><math>C_{15}H_{13}FO_2</math>, <math>C_5H_9NO_2</math><br/>(2<i>R</i>)-2-(2-fluoro[1,1'-biphenyl]-4-yl)propanoic acid (2<i>S</i>)-pyrrolidin-1-ium-2-carboxylate {(<i>R</i>)-flurbiprofen <i>L</i>-proline}</p>                                                            | 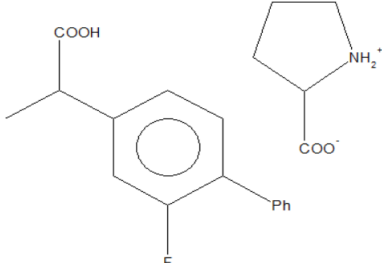   |
| <p>VEVKOZ<br/>[Tumanova,<br/>2018]</p>     | <p><math>2(C_{15}H_{13}FO_2)</math>, <math>C_5H_9NO_2</math><br/>bis((2<i>R</i>)-2-(2-fluoro-[1,1'-biphenyl]-4-yl)propanoic acid) (2<i>S</i>)-pyrrolidin-1-ium-2-carboxylate { bis((<i>R</i>)-flurbiprofen) <i>L</i>-proline }</p>                                            |    |
| <p>VEVKUF<br/>[Tumanova,<br/>2018]</p>     | <p><math>C_{15}H_{13}FO_2</math>, <math>3(C_5H_9NO_2)</math><br/>(2<i>R</i>)-2-(2-fluoro-[1,1'-biphenyl]-4-yl)propanoic acid tris((2<i>S</i>)-pyrrolidin-1-ium-2-carboxylate) {(<i>R</i>)-flurbiprofen tris(<i>L</i>-proline)}</p>                                            |    |
| <p>VEVLAM<br/>[Tumanova,<br/>2018]</p>     | <p><math>C_{15}H_{13}FO_2</math>, <math>2(C_5H_9NO_2)</math><br/>(2<i>R</i>)-2-(2-fluoro[1,1'-biphenyl]-4-yl)propanoic acid bis((2<i>S</i>)-pyrrolidin-1-ium-2-carboxylate) {(<i>R</i>)-flurbiprofen bis((<i>L</i>)-proline)}</p>                                             |   |
| <p>VEVLEQ(01)<br/>[Tumanova,<br/>2018]</p> | <p><math>C_{15}H_{13}FO_2</math>, <math>C_5H_9NO_2</math>, <math>0.5(CH_4O)</math><br/>(2<i>R</i>)-2-(2-fluoro[1,1'-biphenyl]-4-yl)propanoic acid (2<i>S</i>)-pyrrolidin-1-ium-2-carboxylate methanol solvate {(<i>R</i>)-flurbiprofen <i>L</i>-proline methanol solvate}</p> |  |
| <p>VEVLOA<br/>[Tumanova,<br/>2018]</p>     | <p><math>C_{15}H_{13}FO_2</math>, <math>C_5H_9NO_2</math>, <math>0.5(C_2H_6O)</math><br/>(2<i>R</i>)-2-(2-fluoro[1,1'-biphenyl]-4-yl)propanoic acid (2<i>S</i>)-pyrrolidin-1-ium-2-carboxylate ethanol solvate {(<i>R</i>)-flurbiprofen <i>L</i>-proline ethanol solvate}</p> |  |
| <p>VEVLUG<br/>[Tumanova,<br/>2018]</p>     | <p><math>2(C_{15}H_{13}FO_2)</math>, <math>C_5H_9NO_2</math><br/>bis((2<i>R</i>)-2-(2-fluoro-[1,1'-biphenyl]-4-yl)propanoic acid) (2<i>R</i>)-pyrrolidin-1-ium-2-carboxylate { bis((<i>R</i>)-flurbiprofen) <i>D</i>-proline }</p>                                            |  |

|                                            |                                                                                                                                                                                                                             |                                                                                      |
|--------------------------------------------|-----------------------------------------------------------------------------------------------------------------------------------------------------------------------------------------------------------------------------|--------------------------------------------------------------------------------------|
| <p>VEVMAN<br/>[Tumanova,<br/>2018]</p>     | <p><math>C_{15}H_{13}FO_2</math>, <math>C_5H_9NO_2</math><br/>(2<i>R</i>)-2-(2-fluoro[1,1'-biphenyl]-4-yl)propanoic acid (2<i>R</i>)-pyrrolidin-1-ium-2-carboxylate {(<i>R</i>)-flurbiprofen <i>D</i>-proline}</p>          | 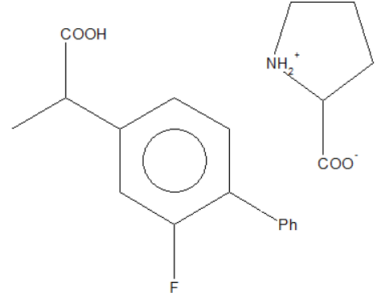   |
| <p>VEVMER<br/>[Tumanova,<br/>2018]</p>     | <p><math>2(C_{15}H_{13}FO_2)</math>, <math>C_5H_9NO_2</math><br/>bis((2<i>R</i>)-2-(2-fluoro[1,1'-biphenyl]-4-yl)propanoic acid) rac-pyrrolidin-1-ium-2-carboxylate { bis((<i>R</i>)-flurbiprofen) <i>D,L</i>-proline }</p> |    |
| <p>VEVMIV<br/>[Tumanova,<br/>2018]</p>     | <p><math>C_{15}H_{13}FO_2</math>, <math>C_5H_9NO_2</math><br/>(2<i>R</i>)-2-(2-fluoro-[1,1'-biphenyl]-4-yl)propanoic acid rac-pyrrolidin-1-ium-2-carboxylate {(<i>R</i>)-flurbiprofen <i>DL</i>-proline }</p>               |   |
| <p>VEVMOB(01)<br/>[Tumanova,<br/>2018]</p> | <p><math>C_{15}H_{13}FO_2</math>, <math>C_5H_9NO_2</math><br/>rac-2-(2-fluoro-[1,1'-biphenyl]-4-yl)propanoic acid (2<i>R</i>)-pyrrolidin-1-ium-2-carboxylate {rac-flurbiprofen <i>D</i>-proline }</p>                       |  |
| <p>VEVMUH(01)<br/>[Tumanova,<br/>2018]</p> | <p><math>C_{15}H_{13}FO_2</math>, <math>C_5H_9NO_2</math><br/>rac-2-(2-fluoro[1,1'-biphenyl]-4-yl)propanoic acid (2<i>S</i>)-pyrrolidin-1-ium-2-carboxylate {rac-flurbiprofen <i>L</i>-proline }</p>                        |  |
| <p>VEVNIW<br/>[Tumanova,<br/>2018]</p>     | <p><math>2(C_{15}H_{13}FO_2)</math>, <math>C_5H_9NO_2</math><br/>bis(rac-2-(2-fluoro-[1,1'-biphenyl]-4-yl)propanoic acid) (2<i>S</i>)-pyrrolidin-1-ium-2-carboxylate { bis(rac-flurbiprofen) <i>L</i>-proline }</p>         |  |

|                                    |                                                                                                                                                                                                                                                                                                                                                                                                                 |                                                                                      |
|------------------------------------|-----------------------------------------------------------------------------------------------------------------------------------------------------------------------------------------------------------------------------------------------------------------------------------------------------------------------------------------------------------------------------------------------------------------|--------------------------------------------------------------------------------------|
| <p>VEVNOC<br/>[Tumanova, 2018]</p> | <p><math>C_{15}H_{13}FO_2</math>, <math>C_5H_9NO_2</math><br/>rac-2-(2-fluoro-[1,1'-biphenyl]-4-yl)propanoic acid rac-pyrrolidin-1-ium-2-carboxylate { rac-flurbiprofen <i>DL</i>-proline }</p>                                                                                                                                                                                                                 | 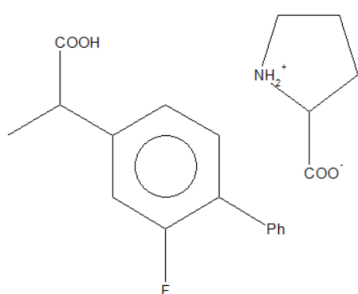   |
| <p>VIOABR10<br/>[Coggon, 1970]</p> | <p><math>C_8H_{15}N_5O_{22}^+</math>, <math>2(Br^-)</math>, <math>3(H_2O)</math><br/>viocidic acid dihydrobromide trihydrate</p>                                                                                                                                                                                                                                                                                |    |
| <p>WERMIQ<br/>[Klussman, 2006]</p> | <p><math>C_5H_9NO_2</math>, <math>0.5(CHCl_3)</math><br/>pyrrolidinium-2-carboxylate chloroform solvate { <i>DL</i>-proline chloroform solvate }</p>                                                                                                                                                                                                                                                            |    |
| <p>XEGKIG<br/>[Ambika, 2017]</p>   | <p><math>C_5H_9NO_2</math>, <math>2(C_7H_4Cl_2O_2)</math>, <math>0.5(H_2O)</math><br/><i>L</i>-proline bis(2,4-dichlorobenzoic acid) hemihydrate</p>                                                                                                                                                                                                                                                            |    |
| <p>YEBLUO<br/>[Fuijsawa, 2012]</p> | <p><math>C_{36}H_{40}O_{12}</math>, <math>C_5H_9NO_2</math>, <math>C_2H_6O</math>, <math>3(H_2O)</math><br/>2,8,14,20-tetraethylpentacyclo[19.3.1.13,7.19,13.115,19]octacosal(25),3(28),4,6,9(27),10,12,15(26),16,18,21,23-dodecaene-4,5,6,10,11,12,16,17,18,22,23,24-dodecol <i>DL</i>-proline ethanol solvate trihydrate { <i>C</i>-ethylpyrogallo(4)arene <i>DL</i>-proline ethanol solvate trihydrate }</p> |   |
| <p>YEBMAV<br/>[Fuijsawa, 2012]</p> | <p><math>C_{36}H_{40}O_{12}</math>, <math>2(C_5H_9NO_2)</math>, <math>2(H_2O)</math><br/>2,8,14,20-tetraethylpentacyclo[19.3.1.13,7.19,13.115,19]-octacosal(25),3(28),4,6,9(27),10,12,15(26),16,18,21,23-dodecaene-4,5,6,10,11,12,16,17,18,22,23,24-dodecol bis(<i>DL</i>-proline) dihydrate { <i>C</i>-ethylpyrogallo(4)arene bis(<i>DL</i>-proline) dihydrate }</p>                                           |  |
| <p>YEPJEL [Yadav, 2018]</p>        | <p><math>C_8H_5F_3N_2OS</math>, <math>C_5H_9NO_2</math><br/>pyrrolidin-1-ium-2-carboxylate 6-(trifluoromethoxy)-1,3-benzothiazol-2-amine { riluzole proline }</p>                                                                                                                                                                                                                                               |  |
| <p>ZAPDAY<br/>[Chesna, 2017]</p>   | <p><math>C_5H_9NO_2</math>, <math>C_7H_6O_2</math><br/>pyrrolidin-1-ium-2-carboxylate benzoic acid</p>                                                                                                                                                                                                                                                                                                          |  |



|                             |                                                                                                                                                                                  |  |
|-----------------------------|----------------------------------------------------------------------------------------------------------------------------------------------------------------------------------|--|
| ZEZHIV<br>[Aakeroy, 1995]   | $C_5H_9NO_2$ , $C_7H_6O_4$<br><i>L</i> -proline 2,5-dihydroxybenzoic acid                                                                                                        |  |
| ZINPEU(01)<br>[Surov, 2018] | $C_{13}H_{11}ClN_2O_2$ , $C_5H_9NO_2$<br>pyrrolidin-1-ium-2-carboxylate 2-[(3-chloro-2-methylphenyl)amino]pyridine-3-carboxylic acid {clonixin proline}                          |  |
| ZINPIY [Li, 2018]           | $C_5H_9NO_2$ , $C_4H_4FN_3O$<br>pyrrolidin-1-ium-2-carboxylate 4-amino-5-fluoropyrimidin-2(1H)-one {flucytosine proline}                                                         |  |
| ZINPUK<br>[Duanxiu, 2018]   | $C_9H_{10}N_4O_2S_2$ , $C_5H_9NO_2$<br>pyrrolidin-1-ium-2-carboxylate 4-amino- <i>N</i> -(5-methyl-1,3,4-thiadiazol-2(3H)-ylidene)benzene-1-sulfonamide {sulfamethizole proline} |  |
| ZIZHAR [Oliver, 1995]       | $C_{19}H_{26}N_2O_6$ , $H_2O$<br><i>N</i> - <i>t</i> -butoxycarbonyl-tyrosyl-proline monohydrate                                                                                 |  |

\*see references below

**Table S2.** Chemical names of analyzed compounds.

| CSD ref. code | Name                                                                                                                                                                                                             |
|---------------|------------------------------------------------------------------------------------------------------------------------------------------------------------------------------------------------------------------|
|               | <b>Proline structures</b>                                                                                                                                                                                        |
| PROLIN03      | <i>L</i> -proline                                                                                                                                                                                                |
| QANRUT        | <i>D,L</i> -proline                                                                                                                                                                                              |
| NELSEC        | <i>R</i> -thioprolin                                                                                                                                                                                             |
|               | <b>Proline-based ACEI</b>                                                                                                                                                                                        |
| CIYNIH        | 1-( <i>N</i> -(1 <i>S</i> )-carboxy-3-phenylpropyl)- <i>L</i> -alanyl)- <i>L</i> -proline trihydrate                                                                                                             |
| DIVHOF01      | <i>N</i> -(1-ethoxycarbonyl-3-phenylpropyl)- <i>L</i> -alanylium- <i>L</i> -proline hydrogen maleate                                                                                                             |
| GERWUX01      | 1-(6-ammonio-2-((1-carboxylato-3-phenylpropyl)ammonio)hexanoyl)pyrrolidine-2-carboxylate dihydrate {synonyme: <i>N</i> 2-[(1 <i>S</i> )-1-carboxy-3-phenylpropyl]- <i>L</i> -lysyl- <i>L</i> -proline dihydrate} |
| GERXAE        | 1-(6-ammonio- <i>N</i> -(1-carboxy-3-phenylpropyl)norleucyl)pyrrolidine-2-carboxylate monohydrate                                                                                                                |
| GERXEI        | 1-(6-ammonio- <i>N</i> -(1-carboxy-3-phenylpropyl)norleucyl)pyrrolidine-2-carboxylate                                                                                                                            |
| TUHMOY        | sodium 4-cyclohexyl-1-(((2-methyl-1-(propionyloxy)propoxy)(4-phenylbutyl)phosphoryl)acetyl)pyrrolidine-2-carboxylate                                                                                             |
| TUHMUE        | sodium hemi zofenopril                                                                                                                                                                                           |

| <b>Perindopril-derived compounds</b>     |                                                                                                                                                                                                                              |
|------------------------------------------|------------------------------------------------------------------------------------------------------------------------------------------------------------------------------------------------------------------------------|
| IVEGIA                                   | (2 <i>S</i> ,3 <i>aS</i> ,7 <i>aS</i> )-1-[(2 <i>S</i> )-2-[[ <i>(2S)</i> -1-ethoxy-1-oxopentan-2-yl]amino]propanoyl]2,3,3 <i>a</i> ,4,5,6,7,7 <i>a</i> -octahydroindole-2-carboxylate- <i>t</i> -butylammonium dihydrate    |
| UZOVAH03                                 | (2 <i>S</i> ,3 <i>aS</i> ,7 <i>aS</i> )-1-[(2 <i>S</i> )-2-[[ <i>(2S)</i> -1-ethoxy-1-oxopentan-2-yl]amino]propanoyl]2,3,3 <i>a</i> ,4,5,6,7,7 <i>a</i> -octahydroindole-2-carboxylate- <i>t</i> -butylaminium               |
| BECWIR                                   | perindoprilat dimethylsulfoxide solvate                                                                                                                                                                                      |
| FEFKEI                                   | (1 <i>S</i> )-2-(( <i>S</i> )-1-[2 <i>S</i> ,3 <i>aS</i> ,7 <i>aS</i> )-(2-carboxyoctahydro-1 <i>H</i> -indol-1-yl]-1-oxopropan-2-yl)ammonio)pentanoate monohydrate                                                          |
| BILNAN                                   | ethyl (2 <i>S</i> )-2-[(3 <i>S</i> ,5 <i>aS</i> ,9 <i>aS</i> ,10 <i>aS</i> )-3-methyl-1,4-dioxo-5 <i>a</i> ,6,7,8,9 <i>a</i> ,10,10 <i>a</i> -octahydro-3 <i>H</i> -pyrazino[1,2- $\alpha$ ]indol-2-yl]pentanoate            |
| BILNAN01                                 | ethyl (2 <i>S</i> )-2-[(3 <i>S</i> ,5 <i>aS</i> ,9 <i>aS</i> ,10 <i>aS</i> )-3-methyl-1,4-dioxo-5 <i>a</i> ,6,7,8,9 <i>a</i> ,10,10 <i>a</i> -octahydro-3 <i>H</i> -pyrazino[1,2- $\alpha$ ]indol-2-yl]pentanoate            |
| <b>Other modified proline-based ACEI</b> |                                                                                                                                                                                                                              |
| EDALEC                                   | 1,3-dihydroxy-2-(hydroxymethyl)propan-2-aminium-1-( <i>N</i> -(ethoxy-1-oxo-4-phenylbutan-2-yl)alanyl)octahydrocyclopenta[b]pyrrole-2-carboxylate<br>{synonyme: 1,3-dihydroxy-2-(hydroxymethyl)propan-2-aminium ramiprilate} |
| FIFGEG                                   | 2-( <i>N</i> -(( <i>S</i> )-1-carboxy-3-phenylpropyl)- <i>L</i> -alanyl)-(1 <i>S</i> ,3 <i>S</i> ,5 <i>S</i> )-2-azabicyclo(3.3.0)octane-3-carboxylic acid methanol clathrate                                                |
| IQISAE                                   | (2 <i>S</i> ,3 <i>aS</i> ,7 <i>aS</i> )-1-[(2 <i>S</i> )-2-[[ <i>(2S)</i> -1-ethoxy-1-oxo-4-phenylbutan-2-yl]amino]propanoyl]-2,3,3 <i>a</i> ,4,5,6,7,7 <i>a</i> -octahydroindole-2-carboxylic acid                          |
| MCPRL01                                  | 1-(2-methyl-3-sulfanylpropanoyl)proline                                                                                                                                                                                      |
| YOZTIS                                   | 1,1'-(disulfanediybis(2-methyl-1-oxopropane-3,1-diyl)dipyrrolidine-2-carboxylic acid                                                                                                                                         |
| QQQWAW                                   | 1-(2-(1-ethoxycarbonyl-3-phenylpropylamino)propionyl)-octahydrocyclopenta(b)-pyrrole-2-carboxylic acid                                                                                                                       |
| RUWBAM                                   | (8 <i>S</i> -(7( <i>R</i> *( <i>R</i> *)),8 <i>R</i> *)))-7-(2-((1-(ethoxycarbonyl)-3-phenylpropyl)amino)-1-oxopropyl)-2,4-dithia-7-azaspiro(4,4)nonane-8-carboxylic acid hydrochloride monohydrate                          |

**Table S3.** Crystal data of proline, proline-based and modified-proline-based ACEI structures and their derivatives.

| <b>Proline structures and its analogue</b> |                                                                                                                                        |                                                                                               |                                                                                                       |                                                                                                         |                                                                                                 |                                                                                        |                                                                                                    |
|--------------------------------------------|----------------------------------------------------------------------------------------------------------------------------------------|-----------------------------------------------------------------------------------------------|-------------------------------------------------------------------------------------------------------|---------------------------------------------------------------------------------------------------------|-------------------------------------------------------------------------------------------------|----------------------------------------------------------------------------------------|----------------------------------------------------------------------------------------------------|
| compound name                              | <b>L-proline</b>                                                                                                                       | <b>D,L-proline</b>                                                                            | <b>R-thioproline</b>                                                                                  |                                                                                                         |                                                                                                 |                                                                                        |                                                                                                    |
| CCDC ref. code                             | <b>PROLIN03</b><br>[38], see the Article                                                                                               | <b>QANRUT</b><br>[176]                                                                        | <b>NELSEC</b><br>[177]                                                                                |                                                                                                         |                                                                                                 |                                                                                        |                                                                                                    |
| formula                                    | C <sub>5</sub> H <sub>9</sub> NO <sub>2</sub>                                                                                          | C <sub>5</sub> H <sub>9</sub> N <sub>1</sub> O <sub>2</sub>                                   | C <sub>4</sub> H <sub>7</sub> NO <sub>2</sub> S                                                       |                                                                                                         |                                                                                                 |                                                                                        |                                                                                                    |
| Crystal system                             | orthorhombic                                                                                                                           | monoclinic                                                                                    | orthorhombic                                                                                          |                                                                                                         |                                                                                                 |                                                                                        |                                                                                                    |
| Space group                                | P2 <sub>1</sub> 2 <sub>1</sub> 2 <sub>1</sub>                                                                                          | P2 <sub>1</sub> /c                                                                            | P2 <sub>1</sub> 2 <sub>1</sub> 2 <sub>1</sub>                                                         |                                                                                                         |                                                                                                 |                                                                                        |                                                                                                    |
| Z                                          | 4                                                                                                                                      | 4                                                                                             | 4                                                                                                     |                                                                                                         |                                                                                                 |                                                                                        |                                                                                                    |
| Unit cell parameters [A, o]                | a=5.28018(12),<br>b=8.8794(2),<br>c=11.5307(2)<br>$\alpha=90$<br>$\beta=90$<br>$\gamma=90$                                             | a=8.9906(6)<br>b=5.2987(4)<br>c=11.4786(8)<br>$\alpha=90$<br>$\beta=97.041(2)$<br>$\gamma=90$ | a=5.6733(3)<br>b=9.9375(6)<br>c=9.9407(6)<br>$\alpha=90$ $\beta=90$<br>$\gamma=90$                    |                                                                                                         |                                                                                                 |                                                                                        |                                                                                                    |
| V [Å <sup>3</sup> ]                        | 540.615                                                                                                                                | 544.699                                                                                       | 560.441                                                                                               |                                                                                                         |                                                                                                 |                                                                                        |                                                                                                    |
| R <sub>1</sub> [I > 2σ(I)]                 | 3.39                                                                                                                                   | 3.95                                                                                          | 2.9                                                                                                   |                                                                                                         |                                                                                                 |                                                                                        |                                                                                                    |
| T [K]                                      | 100                                                                                                                                    | 120                                                                                           | room                                                                                                  |                                                                                                         |                                                                                                 |                                                                                        |                                                                                                    |
| <b>Proline-based ACEI</b>                  |                                                                                                                                        |                                                                                               |                                                                                                       |                                                                                                         |                                                                                                 |                                                                                        |                                                                                                    |
| compound name                              | <b>enalapril maleate</b>                                                                                                               | <b>enalaprilat</b>                                                                            | <b>lisinopril</b>                                                                                     | <b>lisinopril monohydrate</b>                                                                           | <b>lisinopril dihydrate</b>                                                                     | <b>captopril</b>                                                                       | <b>Captopril disulfide</b>                                                                         |
| CCDC ref. code                             | <b>DIVHOF01</b><br>[193]                                                                                                               | <b>CIYNIH</b><br>[192]                                                                        | <b>GERXEI</b> [194]                                                                                   | <b>GERXAE</b><br>[194]                                                                                  | <b>GERWUX01</b><br>[195]                                                                        | <b>MCPRL01</b> [B., 2015]                                                              | <b>YOZTIS</b><br>[188]                                                                             |
| formula                                    | C <sub>20</sub> H <sub>29</sub> N <sub>2</sub> O <sub>5</sub> <sup>+</sup> · C <sub>4</sub> H <sub>3</sub> O <sub>4</sub> <sup>-</sup> | C <sub>18</sub> H <sub>24</sub> N <sub>2</sub> O <sub>5</sub> · 3H <sub>2</sub> O             | C <sub>21</sub> H <sub>31</sub> N <sub>3</sub> O <sub>5</sub>                                         | C <sub>21</sub> H <sub>31</sub> N <sub>3</sub> O <sub>5</sub> · 2(H <sub>2</sub> O)                     | C <sub>21</sub> H <sub>31</sub> N <sub>3</sub> O <sub>5</sub> · 2(H <sub>2</sub> O)             | C <sub>19</sub> H <sub>15</sub> NO <sub>3</sub> S                                      | C <sub>18</sub> H <sub>28</sub> N <sub>2</sub> O <sub>6</sub> S <sub>2</sub>                       |
| Crystal system                             | monoclinic                                                                                                                             | orthorhombic                                                                                  | monoclinic                                                                                            | monoclinic                                                                                              | monoclinic                                                                                      | orthorhombic                                                                           | monoclinic                                                                                         |
| Space group                                | P2 <sub>1</sub>                                                                                                                        | P2 <sub>1</sub> 2 <sub>1</sub> 2 <sub>1</sub>                                                 | P2 <sub>1</sub>                                                                                       | P2 <sub>1</sub>                                                                                         | P2 <sub>1</sub>                                                                                 | P2 <sub>1</sub> 2 <sub>1</sub> 2 <sub>1</sub>                                          | P2 <sub>1</sub>                                                                                    |
| Z                                          | 2                                                                                                                                      | 4                                                                                             | 2                                                                                                     | 2                                                                                                       | 2                                                                                               | 4                                                                                      | 2                                                                                                  |
| Unit cell parameters [A, o]                | a=11.224(4)<br>b=6.645(2)<br>c=17.824(5)<br>$\alpha=90$<br>$\beta=105.52(3)$<br>$\gamma=90$                                            | a=9.798(2)<br>b=10.452(2)<br>c=19.819(5)<br>$\alpha=90$<br>$\beta=90$<br>$\gamma=90$          | a=15.17734(29)<br>b=5.94528(8)<br>c=14.22942(26)<br>$\alpha=90$<br>$\beta=120.6221(9)$<br>$\gamma=90$ | a=14.66805(34)<br>b=5.91244(11)<br>c=14.22565(30)<br>$\alpha=90$<br>$\beta=112.8806(13)$<br>$\gamma=90$ | a=14.5491(18)<br>b=5.8917(8)<br>c=14.238(2)<br>$\alpha=90$<br>$\beta=112.832(3)$<br>$\gamma=90$ | a=6.8001(1)<br>b=8.8015(2)<br>c=17.4805(3)<br>$\alpha=90$<br>$\beta=90$<br>$\gamma=90$ | a= 6.6678(4)<br>b= 11.0680(6)<br>c= 14.4219(8)<br>$\alpha=90$<br>$\beta= 91.925(2)$<br>$\gamma=90$ |
| V [Å <sup>3</sup> ]                        | 1280.903                                                                                                                               | 2029.638                                                                                      | 1104.916                                                                                              | 1136.633                                                                                                | 1124.838                                                                                        | 1046.227                                                                               | 1063.724                                                                                           |
| R <sub>1</sub> [I > 2σ(I)]                 | 8.9                                                                                                                                    | 4.6                                                                                           | 6.64                                                                                                  | 4.64                                                                                                    | 5.3                                                                                             | 1.95                                                                                   | 4.11                                                                                               |

| <i>T</i> [K]                                     | room                                                                                                                | room                                                                                                                                     | room                                                                                                                       | room                                                                                                                                             | 173                                                                                                                    | 100                                                                                                                                                                                                                                                            | 100                                                                                                                   |
|--------------------------------------------------|---------------------------------------------------------------------------------------------------------------------|------------------------------------------------------------------------------------------------------------------------------------------|----------------------------------------------------------------------------------------------------------------------------|--------------------------------------------------------------------------------------------------------------------------------------------------|------------------------------------------------------------------------------------------------------------------------|----------------------------------------------------------------------------------------------------------------------------------------------------------------------------------------------------------------------------------------------------------------|-----------------------------------------------------------------------------------------------------------------------|
| <b>Modifie proline-based ACEI</b>                |                                                                                                                     |                                                                                                                                          |                                                                                                                            |                                                                                                                                                  |                                                                                                                        |                                                                                                                                                                                                                                                                |                                                                                                                       |
| <i>compound name</i>                             | perindoprilat hydrate                                                                                               | Perindoprilat DMSO solvate                                                                                                               | perindopril erbumine                                                                                                       | perindopril erbumine dihydrate                                                                                                                   | diketapiperazine of perindopril                                                                                        | diketapiperazine of perindopril                                                                                                                                                                                                                                | trandolapril                                                                                                          |
| <i>CCDC ref. code</i>                            | FEFKEI [184]                                                                                                        | BECWIR [185]                                                                                                                             | UZOVAH03 [189]                                                                                                             | IVEGIA [189]                                                                                                                                     | BILNAN [187]                                                                                                           | BILNAN01 [186, 187]                                                                                                                                                                                                                                            | IQISAE [200]                                                                                                          |
| <i>formula</i>                                   | C <sub>17</sub> H <sub>28</sub> N <sub>2</sub> O <sub>5</sub> · H <sub>2</sub> O                                    | C <sub>17</sub> H <sub>28</sub> N <sub>2</sub> O <sub>5</sub> · 0.5 (C <sub>2</sub> H <sub>6</sub> OS)                                   | C <sub>19</sub> H <sub>31</sub> N <sub>2</sub> O <sub>5</sub> <sup>-</sup> · C <sub>4</sub> H <sub>12</sub> N <sup>+</sup> | C <sub>19</sub> H <sub>31</sub> N <sub>2</sub> O <sub>5</sub> <sup>-</sup> · C <sub>4</sub> H <sub>12</sub> N <sup>+</sup> · 2(H <sub>2</sub> O) | C <sub>19</sub> H <sub>30</sub> N <sub>2</sub> O <sub>4</sub>                                                          | C <sub>19</sub> H <sub>30</sub> N <sub>2</sub> O <sub>4</sub>                                                                                                                                                                                                  | C <sub>24</sub> H <sub>34</sub> N <sub>2</sub> O <sub>5</sub>                                                         |
| <i>Crystal system</i>                            | orthorhombic                                                                                                        | orthorhombic                                                                                                                             | monoclinic                                                                                                                 | triclinic                                                                                                                                        | orthorhombic                                                                                                           | tetragonal                                                                                                                                                                                                                                                     | orthorhombic                                                                                                          |
| <i>Space group</i>                               | <i>P</i> 2 <sub>1</sub> 2 <sub>1</sub> 2 <sub>1</sub>                                                               | <i>P</i> 2 <sub>1</sub> 2 <sub>1</sub> 2 <sub>1</sub>                                                                                    | <i>P</i> 2 <sub>1</sub>                                                                                                    | <i>P</i> 1                                                                                                                                       | <i>P</i> 2 <sub>1</sub> 2 <sub>1</sub> 2 <sub>1</sub>                                                                  | <i>P</i> 4 <sub>1</sub> 2 <sub>1</sub> 2 <sub>1</sub>                                                                                                                                                                                                          | <i>P</i> 2 <sub>1</sub> 2 <sub>1</sub> 2 <sub>1</sub>                                                                 |
| <i>Z</i>                                         | 4                                                                                                                   | 8                                                                                                                                        | 2                                                                                                                          | 2                                                                                                                                                | 8                                                                                                                      | 8                                                                                                                                                                                                                                                              | 4                                                                                                                     |
| <i>Unit cell parameters [A, o]</i>               | <i>a</i> =8.1645(2)<br><i>b</i> =10.0136(2)<br><i>c</i> =23.2429(5)<br><i>α</i> =90<br><i>β</i> =90<br><i>γ</i> =90 | <i>a</i> =10.3504(7)<br><i>b</i> =16.0908(11)<br><i>c</i> =24.4828(16)<br><i>α</i> =90<br><i>β</i> =90<br><i>γ</i> =90                   | <i>a</i> =12.400(3)<br><i>b</i> =6.4313(17)<br><i>c</i> =16.656(4)<br><i>α</i> =90<br><i>β</i> =97.013(3)<br><i>γ</i> =90  | <i>a</i> =6.5746(3)<br><i>b</i> =12.1652(5)<br><i>c</i> =16.9885(8)<br><i>α</i> =97.153(4)<br><i>β</i> =94.417(4)<br><i>γ</i> =90.349(3)         | <i>a</i> =9.2089(10)<br><i>b</i> =17.9875(17)<br><i>c</i> =23.697(2)<br><i>α</i> =90<br><i>β</i> =90<br><i>γ</i> =90   | <i>a</i> =9.2606(8)<br><i>b</i> =9.2606(8)<br><i>c</i> =44.847(4)<br><i>α</i> =90<br><i>β</i> =90<br><i>γ</i> =90                                                                                                                                              | <i>a</i> =19.7685(4)<br><i>b</i> =15.0697(4)<br><i>c</i> =7.67036(17)<br><i>α</i> =90<br><i>β</i> =90<br><i>γ</i> =90 |
| <i>V</i> [Å <sup>3</sup> ]                       | 1900.247                                                                                                            | 4077.518                                                                                                                                 | 1318.347                                                                                                                   | 1344.015                                                                                                                                         | 3925.292                                                                                                               | 3448.021                                                                                                                                                                                                                                                       | 2285.041                                                                                                              |
| <i>R<sub>i</sub></i> [ <i>I</i> >2σ( <i>I</i> )] | 2.69                                                                                                                | 2.68                                                                                                                                     | 7.59                                                                                                                       | 3.73                                                                                                                                             | 5.67                                                                                                                   | 3.91                                                                                                                                                                                                                                                           | 1.84                                                                                                                  |
| <i>T</i> [K]                                     | 100                                                                                                                 | 100                                                                                                                                      | room                                                                                                                       | room                                                                                                                                             | 100                                                                                                                    | 100                                                                                                                                                                                                                                                            | room                                                                                                                  |
| <i>compound name</i>                             | ramipril                                                                                                            | ramiprilat                                                                                                                               | ramiprilat methanol clathrate                                                                                              | spirapril hydrochloride monohydrate                                                                                                              | sodium fosinopril                                                                                                      | sodium hemi zofenopril                                                                                                                                                                                                                                         |                                                                                                                       |
| <i>CCDC ref. code</i>                            | QOQWAW [198]                                                                                                        | EDALEC [197]                                                                                                                             | FIFGEG [199]                                                                                                               | RUWBAM [201]                                                                                                                                     | TUHMOY [196]                                                                                                           | TUHMUE [196]                                                                                                                                                                                                                                                   |                                                                                                                       |
| <i>formula</i>                                   | C <sub>23</sub> H <sub>32</sub> N <sub>2</sub> O <sub>5</sub>                                                       | C <sub>23</sub> H <sub>31</sub> N <sub>2</sub> O <sub>5</sub> <sup>-</sup> · C <sub>4</sub> H <sub>12</sub> NO <sub>3</sub> <sup>+</sup> | C <sub>21</sub> H <sub>28</sub> N <sub>2</sub> O <sub>5</sub> · 4.7(CH <sub>4</sub> O)                                     | C <sub>22</sub> H <sub>31</sub> N <sub>2</sub> O <sub>5</sub> S <sub>2</sub> <sup>+</sup> · Cl <sup>-</sup> · H <sub>2</sub> O                   | C <sub>30</sub> H <sub>45</sub> NO <sub>7</sub> P <sup>+</sup> · Na <sup>+</sup>                                       | C <sub>22</sub> H <sub>22</sub> NO <sub>4</sub> S <sub>2</sub> <sup>-</sup> · C <sub>22</sub> H <sub>23</sub> NO <sub>4</sub> S <sub>2</sub> · Na <sup>+</sup> (C <sub>44</sub> H <sub>45</sub> N <sub>2</sub> Na <sub>1</sub> O <sub>8</sub> S <sub>4</sub> ) |                                                                                                                       |
| <i>Crystal system</i>                            | orthorhombic                                                                                                        | monoclinic                                                                                                                               | orthorhombic                                                                                                               | orthorhombic                                                                                                                                     | monoclinic                                                                                                             | monoclinic                                                                                                                                                                                                                                                     |                                                                                                                       |
| <i>Space group</i>                               | <i>P</i> 2 <sub>1</sub> 2 <sub>1</sub> 2 <sub>1</sub>                                                               | <i>P</i> 2 <sub>1</sub>                                                                                                                  | <i>P</i> 2 <sub>1</sub> 2 <sub>1</sub> 2 <sub>1</sub>                                                                      | <i>P</i> 2 <sub>1</sub> 2 <sub>1</sub> 2 <sub>1</sub>                                                                                            | <i>P</i> 2 <sub>1</sub>                                                                                                | <i>P</i> 2 <sub>1</sub>                                                                                                                                                                                                                                        |                                                                                                                       |
| <i>Z</i>                                         | 4                                                                                                                   | 2                                                                                                                                        | 4                                                                                                                          | 4                                                                                                                                                | 2                                                                                                                      | 2                                                                                                                                                                                                                                                              |                                                                                                                       |
| <i>Unit cell parameters [A, o]</i>               | <i>a</i> =7.4845(11)<br><i>b</i> =13.937(2)<br><i>c</i> =22.012(3)<br><i>α</i> =90<br><i>β</i> =90<br><i>γ</i> =90  | <i>a</i> =24.3341(15)<br><i>b</i> =6.4645(5)<br><i>c</i> =9.5357(7)<br><i>α</i> =90<br><i>β</i> =96.9165(34)<br><i>γ</i> =90             | <i>a</i> =10.529(1)<br><i>b</i> =12.147(2)<br><i>c</i> =22.240(3)<br><i>α</i> =90<br><i>β</i> =90<br><i>γ</i> =90          | <i>a</i> =10.5075(15)<br><i>b</i> =10.6251(15)<br><i>c</i> =23.407(3)<br><i>α</i> =90<br><i>β</i> =90<br><i>γ</i> =90                            | <i>a</i> =14.258(2)<br><i>b</i> =5.951(1)<br><i>c</i> =18.930(5)<br><i>α</i> =90<br><i>β</i> =93.01(2)<br><i>γ</i> =90 | <i>a</i> =5.461(1)<br><i>b</i> =26.427(3)<br><i>c</i> =15.239(1)<br><i>α</i> =90<br><i>β</i> =97.52(1)<br><i>γ</i> =90                                                                                                                                         |                                                                                                                       |
| <i>V</i> [Å <sup>3</sup> ]                       | 2296.104                                                                                                            | 1489.124                                                                                                                                 | 2844.402                                                                                                                   | 2613.233                                                                                                                                         | 1603.982                                                                                                               | 2180.344                                                                                                                                                                                                                                                       |                                                                                                                       |
| <i>R<sub>i</sub></i> [ <i>I</i> >2σ( <i>I</i> )] | 6.43                                                                                                                | 5.92                                                                                                                                     | 4.2                                                                                                                        | 4.0                                                                                                                                              | 6.6                                                                                                                    | 7.1                                                                                                                                                                                                                                                            |                                                                                                                       |
| <i>T</i> [K]                                     | room                                                                                                                | room                                                                                                                                     | room                                                                                                                       | room                                                                                                                                             | room                                                                                                                   | room                                                                                                                                                                                                                                                           |                                                                                                                       |

**Table S4.** Conformations and puckering parameters of pyrrolidine ring in investigated structures [202].

|                                       | Group of proline type | Puckering parameters                     |                                      |                                                                |                          |
|---------------------------------------|-----------------------|------------------------------------------|--------------------------------------|----------------------------------------------------------------|--------------------------|
|                                       |                       | <i>Q</i> [Å]                             | <i>φ</i> [°]                         |                                                                |                          |
| <b>Proline structures</b>             |                       |                                          |                                      |                                                                |                          |
| NELSEC                                | III                   | 0.5223(13)                               | 12.51(15)                            | <i>envelope</i>                                                | <i>endo</i>              |
| PROLIN03                              | III                   | 0.410(3)                                 | 77.6(4)                              | <i>dist. envelope</i>                                          | <i>endo</i>              |
| QANRUT                                | III                   |                                          |                                      |                                                                | <i>endo</i>              |
| <b>Proline-based ACEI structures</b>  |                       |                                          |                                      |                                                                |                          |
| EDALEC                                | II                    | 0.204(13)                                | 124(4)                               | <i>half-chair</i>                                              |                          |
| FIFGEG                                | II                    | 0.236(5)                                 | 70.4(11)                             | <i>envelope</i>                                                | <i>endo</i>              |
| IQISAE                                | I                     | 0.422(11)                                | 82.0(13)                             | <i>dist. half-chair</i>                                        |                          |
| QOQWAW                                | I                     | 0.275(5)                                 | 61.6(10)                             | <i>dist. half-chair</i>                                        |                          |
| RUWBAM                                | I                     | 0.416(4)                                 | 281.4(5)                             | <i>dist. envelope</i>                                          | <i>exo</i>               |
| <b>Perindopril-derived structures</b> |                       |                                          |                                      |                                                                |                          |
| IVEGIA                                | II                    | mol. 1: 0.384(3)<br>mol. 2: 0.392(3)     | mol. 1: 291.5(4)<br>mol. 2: 293.0(4) | mol. 1: <i>dist. envelope</i><br>mol. 2: <i>dist. envelope</i> | <i>exo</i><br><i>exo</i> |
| UZOVAH                                | II                    | 0.411(8)                                 | 250.9(10)                            | <i>envelope</i>                                                | <i>exo</i>               |
| UZOVAH03                              | II                    | -                                        | -                                    | <i>envelope</i>                                                | <i>exo</i>               |
| BECWIR                                | I                     | mol. 1: 0.3776(14)<br>mol. 2: 0.3928(15) | mol. 1: 285.5(2)<br>mol. 2: 287.8(2) | mol. 1: <i>envelope</i><br>mol. 2: <i>envelope</i>             | <i>exo</i><br><i>exo</i> |
| FEFKEI                                | I                     | 0.3973(14)                               | 284.50(19)                           | <i>envelope</i>                                                | <i>exo</i>               |
| BILNAN                                |                       | mol. 1: 0.381(4)<br>mol. 2: 0.413(4)     | mol. 1: 284.9(5)<br>mol. 2: 284.7(5) | mol. 1: <i>envelope</i><br>mol. 2: <i>envelope</i>             | <i>exo</i><br><i>exo</i> |

|                                                     |    |                   |                   |                                 |             |
|-----------------------------------------------------|----|-------------------|-------------------|---------------------------------|-------------|
| BILNAN01                                            |    | 0.404(2)          | 275.7(3)          | <i>half-chair</i>               |             |
| <b>Other modified-proline-based ACEI structures</b> |    |                   |                   |                                 |             |
| CIYNIH                                              | I  | 0.378(5)          | 77.2(7)           | <i>envelope</i>                 | <i>endo</i> |
| DIVHOF01                                            | II | 0.357(16)         | 271(2)            | <i>half-chair</i>               |             |
| GERXAE                                              | II | 0.129(9)          | 288(3)            | <i>envelope</i>                 | <i>exo</i>  |
| GERXEI                                              | II | 0.187(12)         | 309(4)            | <i>half-chair</i>               |             |
| GERWUX01                                            | II | 0.320(5)          | 250.9(8)          | <i>envelope</i>                 | <i>exo</i>  |
| MCPRL01                                             | I  | 0.3693(19)        | 291.6(3)          | <i>dist. envelope</i>           |             |
| TUHMOY                                              |    | 0.362(11)         | 85.8(16)          | <i>dist. half-chair</i>         |             |
| TUHMUE                                              |    | mol. 1: 0.351(14) | mol. 1: 314(2)    | mol. 1: <i>dist. half-chair</i> |             |
|                                                     |    | mol. 2: 0.471(16) | mol. 2: 273.0(19) | mol. 2: <i>half-chair</i>       |             |
| YOZTIS                                              | I  | mol. 1: 0.385(5)  | mol. 1: 83.7(7)   | mol. 1: <i>dist. half-chair</i> |             |
|                                                     |    | mol. 2: 0.401(6)  | mol. 2: 70.1(7)   | mol. 2: <i>envelope</i>         | <i>endo</i> |

**Table S5.** Conformation of COOH/COO<sup>-</sup> group of proline ring in investigated structures.

| CSD ref. code | Type of tecton | conformation                                         |
|---------------|----------------|------------------------------------------------------|
| NELSEC        | III            | + <i>syn</i> -periplanar                             |
| PROLIN03      | III            | - <i>syn</i> -periplanar                             |
| QANRUT        | III            | - <i>syn</i> -periplanar                             |
| IVEGIA        | II             | - <i>syn</i> -periplanar<br>- <i>syn</i> -periplanar |
| UZOVAH        | II             | - <i>syn</i> -periplanar                             |
| UZOVAH03      | II             | - <i>syn</i> -periplanar                             |
| BECWIR        | I              | - <i>syn</i> -periplanar<br>- <i>syn</i> -periplanar |
| FEFKEI        | I              | - <i>syn</i> -periplanar                             |
| BILNAN        |                | - <i>syn</i> -periplanar                             |
| BILNAN01      |                |                                                      |
| EDALEC        | II             | - <i>syn</i> -clinal<br>+ <i>anti</i> -clinal        |
| FIFGEG        | II             | - <i>syn</i> -periplanar                             |
| IQISAE        | I              | - <i>syn</i> -periplanar                             |
| QOQWAW        | I              | - <i>syn</i> -periplanar                             |
| RUWBAM        | I              | - <i>syn</i> -clinal                                 |
| CIYNIH        | I              | - <i>syn</i> -periplanar                             |
| DIVHOF01      | II             | - <i>syn</i> -clinal                                 |
| GERXAE        | II             | - <i>syn</i> -periplanar                             |
| GERXEI        | II             | - <i>syn</i> -periplanar                             |
| GERWUX01      | II             | - <i>syn</i> -periplanar                             |
| MCPRL01       | I              | - <i>syn</i> -periplanar                             |
| TUHMOY        |                |                                                      |
| TUHMUE        |                |                                                      |
| YOZTIS        | I              | - <i>syn</i> -periplanar<br>- <i>syn</i> -periplanar |

**Table S6.** Relevant atom charges, heteroatom-hydrogen bonds, d(H-X), relative DFT,  $\Delta E_{\text{DFT}}$ , and Gibbs free energies at room temperature,  $\Delta G_{298}$ , of stable structures of *L*-proline (**1**) obtained at M06/6-311++G(d,p)/CPCM(H<sub>2</sub>O) level of theory.

| Structure                                | 1a          | 1b     | 1c     |
|------------------------------------------|-------------|--------|--------|
| Heteroatom X charges                     |             |        |        |
| O1                                       | -0.719      | -0.707 | -0.658 |
| O2                                       | -0.672      | -0.665 | -0.705 |
| N1                                       | -0.746      | -0.714 | -0.715 |
| Relevant hydrogen atoms                  |             |        |        |
| H <sub>A</sub> location                  | N1          | N1     | N1     |
| d(H-X) [Å]                               | 1.013       | 1.013  | 1.017  |
| charge                                   | 0.400       | 0.382  | 0.380  |
| H <sub>B</sub> location                  | N1/O1       | O1     | O2     |
| d(H-X) [Å]                               | 1.821/0.995 | 0.969  | 0.969  |
| charge                                   | 0.519       | 0.510  | 0.510  |
| $\Delta E_{\text{DFT}}$ [kJ/mol]         | 0.0         | 24.2   | 19.1   |
| $\Delta G_{298}$ [kJ/mol]                | 0.0         | 22.7   | 16.6   |
| Rel. Gibbs free energy at 298 K (kJ/mol) | 0.0         | 22.7   | 16.6   |

**Table S7.** Relevant atom charges, heteroatom-hydrogen bonds, d(H-X), relative DFT,  $\Delta E_{\text{DFT}}$ , and Gibbs free energies at room temperature,  $\Delta G_{298}$ , of stable structures of FEFKEI (**2**) obtained at M06/6-311++G(d,p)/CPCM(H<sub>2</sub>O) level of theory.

| Structure                                | 2a          | 2b          | 2c          | 2d          | 2e     | 2f     | 2g               |
|------------------------------------------|-------------|-------------|-------------|-------------|--------|--------|------------------|
| Heteroatom X charges                     |             |             |             |             |        |        |                  |
| O1                                       | -0.693      | -0.733      | -0.709      | -0.685      | -0.710 | -0.721 | -0.558           |
| O2                                       | -0.812      | -0.707      | -0.710      | -0.811      | -0.697 | -0.577 | -0.820           |
| O3                                       | -0.780      | -0.652      | -0.607      | -0.803      | -0.654 | -0.592 | -0.827           |
| O4                                       | -0.642      | -0.718      | -0.819      | -0.655      | -0.649 | -0.825 | -0.730           |
| O5                                       | -0.700      | -0.640      | -0.813      | -0.660      | -0.702 | -0.837 | -0.714           |
| N1                                       | -0.514      | -0.514      | -0.500      | -0.496      | -0.529 | -0.523 | -0.443           |
| N2                                       | -0.610      | -0.730      | -0.602      | -0.697      | -0.696 | -0.698 | -0.682           |
| Relevant hydrogen atoms                  |             |             |             |             |        |        |                  |
| H <sub>A</sub> location                  | N2          | N2          | N2          | N2          | N2     | N2     | N2               |
| d(H-X) [Å]                               | 1.028       | 1.017       | 1.026       | 1.015       | 1.018  | 1.017  | 1.018            |
| charge                                   | 0.449       | 0.394       | 0.459       | 0.378       | 0.378  | 0.388  | 0.370            |
| H <sub>B</sub> location                  | N2/O2       | O2/N2       | N2/O1       | O1/O4       | O2     | O2     | O4 <sup>a)</sup> |
| d(H-X) [Å]                               | 1.042/1.874 | 0.986/1.918 | 1.038/1.985 | 0.992/1.656 | 0.970  | 0.975  | 0.967            |
| charge                                   | 0.473       | 0.519       | 0.473       | 0.526       | 0.508  | 0.546  | 0.514            |
| H <sub>C</sub> location                  | O5          | O4/O1       | O2          | O5          | O5     | O3     | O5 <sup>a)</sup> |
| d(H-X) [Å]                               | 0.969       | 0.990/1.689 | 0.970       | 0.972       | 0.969  | 0.974  | 0.966            |
| charge                                   | 0.512       | 0.520       | 0.530       | 0.524       | 0.510  | 0.547  | 0.512            |
| $\Delta E_{\text{DFT}}$ [kJ/mol]         | 13.8        | 0.0         | 62.1        | 106.3       | 15.7   | 190.9  | 178.9            |
| $\Delta G_{298}$ [kJ/mol]                | 10.8        | 0.0         | 57.3        | 107.0       | 9.9    | 180.8  | 174.5            |
| Rel. Gibbs free energy at 298 K (kJ/mol) | 10.8        | 0.0         | 57.3        | 107.0       | 9.9    | 180.8  | 174.5            |

<sup>a)</sup>additional O1-C15 bond, d(O1-C15) = 1.534 Å

**Table S8.** Relevant atom charges, heteroatom-hydrogen bonds, d(H-X), relative DFT,  $\Delta E_{\text{DFT}}$ , and Gibbs free energies at room temperature,  $\Delta G_{298}$ , of stable structures of protonated IVEGIA (**3**) obtained at M06/6-311++G(d,p)/CPCM(H<sub>2</sub>O) level of theory.

| Structure                                | 3a          | 3b          | 3c     | 3d     | 3e     | 3f     |
|------------------------------------------|-------------|-------------|--------|--------|--------|--------|
| Heteroatom X charges                     |             |             |        |        |        |        |
| O1                                       | -0.710      | -0.725      | -0.695 | -0.696 | -0.705 | -0.706 |
| O2                                       | -0.641      | -0.654      | -0.655 | -0.655 | -0.601 | -0.488 |
| O3                                       | -0.556      | -0.584      | -0.585 | -0.585 | -0.484 | -0.607 |
| O4                                       | -0.819      | -0.719      | -0.704 | -0.649 | -0.823 | -0.823 |
| O5                                       | -0.831      | -0.643      | -0.652 | -0.702 | -0.836 | -0.836 |
| N1                                       | -0.500      | -0.517      | -0.531 | -0.529 | -0.523 | -0.523 |
| N2                                       | -0.600      | -0.696      | -0.697 | -0.697 | -0.689 | -0.678 |
| Relevant hydrogen atoms                  |             |             |        |        |        |        |
| H <sub>A</sub> location                  | N2          | N2          | N2     | N2     | N2     | N2     |
| d(H-X) [Å]                               | 1.029       | 1.018       | 1.019  | 1.019  | 1.016  | 1.017  |
| charge                                   | 0.462       | 0.378       | 0.376  | 0.376  | 0.386  | 0.385  |
| H <sub>B</sub> location                  | N2/O1       | O1/O4       | O4     | O5     | O2     | O3     |
| d(H-X) [Å]                               | 1.036/2.032 | 1.667/0.992 | 0.969  | 0.969  | 0.974  | 0.976  |
| charge                                   | 0.202       | 0.519       | 0.511  | 0.510  | 0.546  | 0.577  |
| $\Delta E_{\text{DFT}}$ [kJ/mol]         | 42.0        | -3.3        | 1.6    | 0.0    | 173.2  | 234.5  |
| $\Delta G_{298}$ [kJ/mol]                | 41.4        | 1.9         | 5.5    | 0.0    | 172.9  | 227.8  |
| Rel. Gibbs free energy at 298 K (kJ/mol) | 41.4        | 1.9         | 5.5    | 0.0    | 172.9  | 227.8  |

**Table S9.** H-bond geometries of all investigated crystal structures.

| D-H...A                   | Symmetry code             | D-H     | H...A   | D...A    | D-H...A [°] |
|---------------------------|---------------------------|---------|---------|----------|-------------|
| <i>Proline structures</i> |                           |         |         |          |             |
| <b>PROLIN03</b>           |                           |         |         |          |             |
| N1-H6...O1                | <i>I+x, y, z</i>          | 0.94(4) | 1.78(4) | 2.707(3) | 167(3)      |
| *N1-H7...O1               |                           | 0.98(3) | 2.23(3) | 2.656(3) | 105(2)      |
| N1-H7...O2                | <i>I-x, -1/2+y, 3/2-z</i> | 0.98(3) | 1.92(4) | 2.763(3) | 143(3)      |

| <b>NELSEC</b>            |                                    |           |           |            |           |
|--------------------------|------------------------------------|-----------|-----------|------------|-----------|
| N1-H1 <sup>···</sup> O1  | $I+x, y, z$                        | 0.79      | 1.89      | 2.6557(16) | 163       |
| *N1-H2 <sup>···</sup> O2 |                                    | 0.81      | 2.12      | 2.6389(17) | 122       |
| N1-H2 <sup>···</sup> O2  | $I/+x, \frac{1}{2}-y, -z$          | 0.81      | 2.17      | 2.7819(19) | 133       |
| *C3-H5 <sup>···</sup> O1 |                                    | 0.97      | 2.51      | 2.888(2)   | 103       |
| C4-H6 <sup>···</sup> O1  | $-x, \frac{1}{2}+y, \frac{1}{2}-z$ | 0.97      | 2.44      | 3.1806(19) | 133       |
| <b>QANRUT</b>            |                                    |           |           |            |           |
| N1-H1 <sup>···</sup> O1  | $x, -I+y, z$                       | 0.92(2)   | 1.80(2)   | 2.7131(14) | 171.8(16) |
| NI-H2 <sup>···</sup> O1  | $-x, I-y, -z$                      | 0.906(19) | 2.093(18) | 2.8392(16) | 138.9(17) |
| C2-H3 <sup>···</sup> O1  | $-x, -I/2+y, \frac{1}{2}-z$        | 1.00      | 2.57      | 3.4857(17) | 151       |

*Proline-based ACEI structures*

| <b>CIYNIH</b>             |                                    |          |         |           |        |
|---------------------------|------------------------------------|----------|---------|-----------|--------|
| *N2-H3 <sup>···</sup> O4  |                                    | 1.02(4)  | 2.29(4) | 2.671(4)  | 100(2) |
| N2-H3 <sup>···</sup> O6   |                                    | 1.02(4)  | 1.85(4) | 2.832(5)  | 161(3) |
| N2-H4 <sup>···</sup> O4   | $\frac{1}{2}+x, \frac{1}{2}-y, -z$ | 0.87(3)  | 1.99(3) | 2.802(5)  | 154(4) |
| O2-H6 <sup>···</sup> O5   | $-x, -I/2+y, \frac{1}{2}-z$        | 0.82(3)  | 1.81(4) | 2.578(5)  | 156(4) |
| O6-H25 <sup>···</sup> O3  | $-I/2+x, \frac{1}{2}-y, -z$        | 0.86(10) | 2.10(8) | 2.890(5)  | 154(5) |
| O6-H26 <sup>···</sup> O7  | $\frac{1}{2}+x, \frac{1}{2}-y, -z$ | 0.82(4)  | 2.09(4) | 2.808(5)  | 146(4) |
| O7-H28 <sup>···</sup> O5  |                                    | 0.96(5)  | 1.85(5) | 2.742(5)  | 153(4) |
| *C4-H2 <sup>···</sup> O4  |                                    | 1.06(4)  | 2.42(4) | 3.080(6)  | 119(3) |
| C17-H23 <sup>···</sup> O2 | $\frac{1}{2}-x, I-y, -I/2+z$       | 1.08(4)  | 2.40(4) | 3.404(7)  | 154(3) |
| <b>DIVHOF01</b>           |                                    |          |         |           |        |
| N1-H6 <sup>···</sup> O7   |                                    | 0.99     | 1.78    | 2.753(15) | 165    |
| N1-H7 <sup>···</sup> O5   | $I-x, -I/2+y, 2-z$                 | 0.98     | 2.42    | 3.137(16) | 129    |
| C20-H14 <sup>···</sup> O3 | $x, I+y, x$                        | 1.02     | 2.54    | 3.285(17) | 129    |
| C4-H15 <sup>···</sup> O9  | $-I+x, y, z$                       | 0.99     | 2.46    | 3.369(16) | 145    |
| C5-H16 <sup>···</sup> O1  | $X, I+y, z$                        | 1.00     | 2.53    | 3.435(17) | 166    |
| C2-H20 <sup>···</sup> O9  | $-I+x, -I+y, z$                    | 0.96     | 2.53    | 3.43(2)   | 156    |
| C15-H23 <sup>···</sup> O9 | $-I+x, y, z$                       | 1.01     | 2.55    | 3.445(17) | 148    |
| <b>GERWUX01</b>           |                                    |          |         |           |        |
| *N1-H1 <sup>···</sup> O1  |                                    | 0.92     | 2.24    | 2.686(4)  | 109    |
| N1-H1 <sup>···</sup> O6   | $I-x, \frac{1}{2}+y, 2-z$          | 0.92     | 2.05    | 2.786(4)  | 136    |
| N1-H2 <sup>···</sup> O2   | $x, I+y, z$                        | 0.92     | 1.81    | 2.726(4)  | 174    |
| N2-H3 <sup>···</sup> O4   | $-x, \frac{1}{2}+y, I-z$           | 0.91     | 1.89    | 2.790(4)  | 172    |
| N2-H4 <sup>···</sup> O5   | $-x, 3/2+y, I-z$                   | 0.91     | 1.85    | 2.721(4)  | 158    |

|                           |                                     |           |           |            |           |
|---------------------------|-------------------------------------|-----------|-----------|------------|-----------|
| N2-H5 <sup>00</sup> O4    | $x, I+y, z$                         | 0.91      | 1.89      | 2.781(4)   | 167       |
| O6-H32 <sup>00</sup> O1   | $I-x, \frac{1}{2}+y, 2-z$           | 0.95(2)   | 1.83(2)   | 2.778(3)   | 179(5)    |
| O6-H33 <sup>00</sup> O1   |                                     | 0.947(19) | 1.94(2)   | 2.857(3)   | 162(3)    |
| O7-H34 <sup>00</sup> O2   |                                     | 0.95(2)   | 1.89(2)   | 2.817(4)   | 165(3)    |
| O7-H35 <sup>00</sup> O7   | $I-x, \frac{1}{2}+y, I-z$           | 0.95(2)   | 2.17(2)   | 3.102(5)   | 169(4)    |
| C17-H25 <sup>00</sup> O5  | $x, I+y, z$                         | 0.99      | 2.41      | 3.366(5)   | 161       |
| C17-H26 <sup>00</sup> O6  | $I-x, \frac{1}{2}+y, 2-z$           | 0.99      | 2.45      | 3.432(5)   | 170       |
| <b>GERXAE</b>             |                                     |           |           |            |           |
| O1-H11 <sup>00</sup> O6   | $I-x, \frac{1}{2}+y, 2-z$           | 0.920(13) | 1.81(2)   | 2.71(2)    | 166.6(9)  |
| N1-H12 <sup>00</sup> O2   | $x, I+y, z$                         | 0.850(11) | 2.075(12) | 2.911(11)  | 167.8(8)  |
| N2-H22 <sup>00</sup> O4   | $-x, \frac{1}{2}+y, I-z$            | 0.86(2)   | 2.048(15) | 2.799(14)  | 145.3(10) |
| N2-H23 <sup>00</sup> O4   | $x, I+y, z$                         | 0.86(3)   | 2.08(3)   | 2.826(14)  | 145(2)    |
| N2-H31 <sup>00</sup> O5   | $-x, 3/2+y, I-z$                    | 0.86(2)   | 1.969(2)  | 2.732(15)  | 148(2)    |
| O6-H32 <sup>00</sup> N1   | $I-x, -1/2+y, 2-z$                  | 0.95(8)   | 1.94(7)   | 2.750(16)  | 142(10)   |
| O6-H33 <sup>00</sup> O1   |                                     | 0.95(3)   | 2.03(2)   | 2.905(16)  | 154(4)    |
| *C12-H14 <sup>00</sup> O3 |                                     | 0.980(14) | 2.508(12) | 2.888(12)  | 102.8(8)  |
| C17-H24 <sup>00</sup> O5  | $x, I+y, z$                         | 0.980(16) | 2.496(19) | 3.421(12)  | 157.3(13) |
| C17-H25 <sup>00</sup> O6  | $I-x, \frac{1}{2}+y, 2-z$           | 0.980(18) | 2.51(3)   | 3.46(2)    | 165.3(14) |
| <b>GERXEI</b>             |                                     |           |           |            |           |
| O2-H11 <sup>00</sup> O2   | $-I-x, -1/2+y, -z$                  | 0.992(15) | 2.557(14) | 3.472(14)  | 171.6(8)  |
| O2-H11 <sup>00</sup> N1   | $-I-x, -1/2+y, -z$                  | 0.992(15) | 2.527(10) | 3.011(10)  | 113.1(8)  |
| N1-H12 <sup>00</sup> O1   | $x, I+y, z$                         | 0.850(16) | 2.360(16) | 3.127(15)  | 150.4(12) |
| N2-H22 <sup>00</sup> O4   | $-x, \frac{1}{2}+y, I-z$            | 0.98(2)   | 1.80(2)   | 2.632(16)  | 141(2)    |
| N2-H23 <sup>00</sup> O4   | $x, I+y, z$                         | 0.98(3)   | 1.82(3)   | 2.737(15)  | 155(2)    |
| N2-H31 <sup>00</sup> O5   | $-x, 3/2+y, I-z$                    | 0.86(3)   | 2.32(3)   | 3.121(16)  | 156(2)    |
| C4-H3 <sup>00</sup> O5    | $-I+x, I+y, z$                      | 0.951(13) | 2.599(14) | 3.274(12)  | 128.2(10) |
| C8-H8 <sup>00</sup> O1    | $x, I+y, z$                         | 0.981(19) | 2.52(2)   | 3.217(15)  | 127.9(11) |
| C13-H16 <sup>00</sup> O3  | $x, I+y, z$                         | 0.98(2)   | 2.47(2)   | 3.289(15)  | 141(2)    |
| <b>MCPRL01</b>            |                                     |           |           |            |           |
| O1-H1 <sup>00</sup> O3    | $I-x, \frac{1}{2}+y, \frac{1}{2}-z$ | 0.80(3)   | 1.80(3)   | 2.5881(17) | 169(3)    |
| S1-H15 <sup>00</sup> O2   | $-I+x, y, z$                        | 1.26(3)   | 2.40(3)   | 3.5165(12) | 146.2(18) |
| C5-H7 <sup>00</sup> O2    | $-1/2+x, 3/2-y, I-z$                | 0.98(2)   | 2.58(2)   | 3.408(2)   | 142.4(15) |
| C8-H11 <sup>00</sup> O1   | $I-x, -1/2+y, \frac{1}{2}-z$        | 1.00(2)   | 2.53(2)   | 3.300(2)   | 133.8(19) |
| <b>TUHMOY</b>             |                                     |           |           |            |           |
| *C8-H10 <sup>00</sup> O3  |                                     | 0.98      | 2.59      | 3.149(12)  | 116       |
| *C18-H22 <sup>00</sup> O7 |                                     | 0.96      | 2.30      | 2.657(13)  | 101       |

|               |                          |      |      |           |     |
|---------------|--------------------------|------|------|-----------|-----|
| C19-H23··O4   |                          | 0.99 | 2.46 | 3.142(13) | 126 |
| <b>TUHMUE</b> |                          |      |      |           |     |
| *O6-H45··O2   |                          | 1.09 | 1.47 | 2.502(12) | 156 |
| *C8-H8··O4    |                          | 0.95 | 2.37 | 2.88(2)   | 113 |
| *C9-H10··O4   | $-I+x, y, z$             | 0.95 | 2.57 | 3.31(3)   | 135 |
| *C12-H13··S1  |                          | 0.95 | 2.57 | 3.025(17) | 110 |
| *C26-H21··O8  |                          | 0.94 | 2.50 | 3.428(19) | 168 |
| *C30-H25··O8  |                          | 0.96 | 2.47 | 2.852(16) | 104 |
| *C31-H26··S3  |                          | 0.91 | 2.87 | 3.227(16) | 105 |
| *C34-H29··S3  |                          | 0.97 | 2.66 | 3.066(16) | 105 |
| <b>YOZTIS</b> |                          |      |      |           |     |
| O1-H1··O4     | $2-x, -I/2+y, -z$        | 0.84 | 1.82 | 2.644(5)  | 167 |
| O2-H2··O5     | $-x, \frac{1}{2}+y, I-z$ | 0.84 | 1.85 | 2.677(5)  | 168 |
| C2-H3··S2     | $I+x, y, z$              | 1.00 | 2.81 | 3.709(4)  | 149 |
| C5-H6··O3     | $2-x, \frac{1}{2}+y, -z$ | 0.99 | 2.44 | 3.307(7)  | 146 |
| C6-H8··S1     | $-I+x, y, z$             | 0.99 | 2.87 | 3.707(4)  | 143 |
| *C7-H9··S1    |                          | 1.00 | 2.84 | 3.389(4)  | 115 |
| C11-H11··O3   | $2-x, \frac{1}{2}+y, -z$ | 0.98 | 2.52 | 3.405(7)  | 151 |
| C16-H23··O3   | $-I+x, y, z$             | 0.99 | 2.28 | 3.255(7)  | 170 |
| C18-H27··O6   | $I+x, -I+y, z$           | 0.99 | 2.57 | 3.179(6)  | 120 |

### *Perindopril structures*

#### **UZOVAH01**

|            |                           |      |      |           |     |
|------------|---------------------------|------|------|-----------|-----|
| N3-H32··O2 | $I-x, \frac{1}{2}+y, I-z$ | 0.89 | 1.85 | 2.738(9)  | 175 |
| N3-H33··O1 | $-I+x, I+y, z$            | 0.89 | 1.88 | 2.765(9)  | 179 |
| N3-H34··O2 | $-I+x, y, z$              | 0.89 | 1.91 | 2.788(10) | 169 |
| N3-H32··O2 | $I-x, \frac{1}{2}+y, I-z$ | 0.89 | 1.85 | 2.738(9)  | 175 |

#### **UZOVAH03**

|              |                           |      |      |           |     |
|--------------|---------------------------|------|------|-----------|-----|
| N3-H32··O4   | $-I+x, y, z$              | 0.89 | 1.91 | 2.80(2)   | 174 |
| N3-H33··O5   | $I-x, \frac{1}{2}+y, I-z$ | 0.89 | 1.89 | 2.782(13) | 177 |
| N3-H34··O5   | $-I+x, I+y, z$            | 0.89 | 1.90 | 2.79(3)   | 174 |
| *C8-H6··O6   |                           | 0.98 | 2.47 | 3.38(3)   | 154 |
| *C10-H7··O2  |                           | 0.98 | 2.59 | 3.28(3)   | 128 |
| *C12-H10··O3 |                           | 0.97 | 2.04 | 2.51(5)   | 108 |
| *C14-H14··O3 |                           | 0.96 | 2.33 | 3.14(7)   | 142 |
| *C14-H14··O7 |                           | 0.96 | 2.37 | 3.30(11)  | 163 |



|               |                           |      |      |           |     |
|---------------|---------------------------|------|------|-----------|-----|
| *C19-H22··O6  | $I-x, \frac{1}{2}+y, I-z$ | 0.96 | 1.09 | 1.67(4)   | 109 |
| *C19-H23··O2  | $I-x, \frac{1}{2}+y, I-z$ | 0.96 | 2.17 | 2.62(5)   | 107 |
| *C12-H44··O3  |                           | 1.16 | 1.86 | 2.51(5)   | 111 |
| *C14-H47··O7  |                           | 1.39 | 2.40 | 3.30(11)  | 118 |
| *C19-H52··O2  |                           | 1.28 | 2.20 | 3.46(4)   | 167 |
| *C19-H52··O3  |                           | 1.28 | 1.90 | 2.60(4)   | 108 |
| *C19-H52··O7  |                           | 1.28 | 1.79 | 2.83(8)   | 134 |
| <b>IVEGIA</b> |                           |      |      |           |     |
| N2-H2··O12    |                           | 0.86 | 2.53 | 3.022(4)  | 117 |
| N5-H63··O5    | $-I+x, y, z$              | 0.89 | 1.94 | 2.813(3)  | 168 |
| N5-H64··O4    |                           | 0.89 | 1.90 | 2.794(3)  | 166 |
| N5-HH65··O10  | $x, -I+y, I+z$            | 0.89 | 1.94 | 2.811(3)  | 166 |
| N6-H79··O9    | $I+x, -I+y, z$            | 0.89 | 1.90 | 2.791(3)  | 179 |
| N6-H80··O5    | $x, y, -I+z$              | 0.89 | 1.90 | 2.784(3)  | 169 |
| C12-H18··O12  | $I+x, y, z$               | 0.97 | 2.53 | 3.500(5)  | 175 |
| C13-H20··O13  | $-I+x, y, z$              | 0.97 | 2.45 | 3.254(13) | 140 |
| C14-H23··O13  |                           | 0.96 | 2.28 | 3.100(13) | 144 |
| C19-H29··O2   | $I+x, y, z$               | 0.96 | 2.57 | 3.513(5)  | 166 |
| C37-H59··O2   |                           | 0.97 | 2.48 | 3.383(4)  | 155 |

**Perindoprilat structures**

|               |                                     |           |           |            |           |
|---------------|-------------------------------------|-----------|-----------|------------|-----------|
| <b>BECWIR</b> |                                     |           |           |            |           |
| N2-H1··O11    |                                     | 0.905(19) | 2.017(19) | 2.8912(15) | 161.9(16) |
| N2-H3··O8     |                                     | 0.898(17) | 1.981(17) | 2.7204(14) | 138.5(15) |
| O5-H6··O2     | $\frac{1}{2}+x, \frac{1}{2}-y, -z$  | 0.93(2)   | 1.70(2)   | 2.5972(14) | 162.4(19) |
| N4-H33··O3    | $2-x, -I/2+y, \frac{1}{2}-z$        | 0.856(19) | 1.990(19) | 2.8157(15) | 161.8(16) |
| N4-H36··O11   |                                     | 0.887(19) | 1.989(19) | 2.8710(16) | 172.2(17) |
| O10-H39··O7   | $-I/2+x, \frac{1}{2}-y, I-z$        | 0.79(2)   | 1.79(2)   | 2.5773(15) | 170(2)    |
| C3-H7··O4     | $-I/2+x, \frac{1}{2}-y, -z$         | 1.00      | 2.56      | 3.3805(17) | 140       |
| *C10-H17··O3  |                                     | 1.00      | 2.42      | 3.0143(16) | 117       |
| C12-H19··O5   | $-I/2+x, \frac{1}{2}-y, -z$         | 0.99      | 2.54      | 3.3191(18) | 135       |
| C18-H29··O9   | $\frac{1}{2}+x, \frac{1}{2}-y, I-z$ | 1.00      | 2.53      | 3.2571(17) | 129       |
| C21-H35··O5   | $2-x, \frac{1}{2}+y, \frac{1}{2}-z$ | 0.99      | 2.57      | 3.5169(17) | 161       |
| *C27-H45··O8  |                                     | 1.00      | 2.50      | 3.0519(16) | 115       |
| C29-H47··O2   | $2-x, -I/2+y, \frac{1}{2}-z$        | 0.99      | 2.58      | 3.4845(18) | 151       |
| C35-H59··O3   | $2-x, -I/2+y, \frac{1}{2}-z$        | 0.98      | 2.46      | 3.420(2)   | 168       |

|               |                      |           |           |            |           |
|---------------|----------------------|-----------|-----------|------------|-----------|
| C36-H61··O7   | $2-x, -1/2+y, 1/2-z$ | 0.98      | 2.29      | 3.218(2)   | 159       |
| <b>FEFKEI</b> |                      |           |           |            |           |
| N2-H2··O2     | $1/2+x, 3/2-y, 2-z$  | 0.884(19) | 1.954(17) | 2.7063(15) | 142.1(15) |
| N2-H3··O6     |                      | 0.959(16) | 1.850(16) | 2.7923(16) | 167.0(15) |
| O5-H11··O3    | $2-x, 1/2+y, 3/2-z$  | 0.890(19) | 1.73(2)   | 2.5929(14) | 163.7(19) |
| O6-H29··O3    | $1+x, y, z$          | 0.90(2)   | 1.89(2)   | 2.7725(15) | 167(2)    |
| O6-H30··O1    |                      | 0.81(2)   | 2.29(2)   | 2.8307(15) | 124(2)    |
| C1-H1··O4     | $2-x, -1/2+y, 3/2-z$ | 1.00      | 2.45      | 3.2777(16) | 140       |
| C4-H7··O1     | $-1+x, y, z$         | 0.99      | 2.56      | 3.3926(17) | 142       |
| *C10-H17··O2  |                      | 1.00      | 2.33      | 2.9600(16) | 120       |
| C11-H18··O5   | $2-x, -1/2+y, 3/2-z$ | 1.00      | 2.50      | 3.1808(16) | 125       |

*DKP perindopril structures*

|                 |                        |      |      |          |     |
|-----------------|------------------------|------|------|----------|-----|
| <b>BILNAN</b>   |                        |      |      |          |     |
| C10-H14··O8     |                        | 1.00 | 2.22 | 3.184(4) | 161 |
| C11-H15··O6     | $1-x, 1/2+y, 3/2-z$    | 1.00 | 2.45 | 3.297(4) | 142 |
| *C12-H17··O4    |                        | 0.99 | 2.51 | 3.062(4) | 115 |
| C29-H44··O4     | $1+x, y, z$            | 1.00 | 2.36 | 3.341(4) | 165 |
| *C31-H46··O8    |                        | 0.99 | 2.53 | 3.082(4) | 115 |
| C38-H59··O5     | $-1+x, y, z$           | 0.98 | 2.54 | 3.408(5) | 148 |
| <b>BILNAN01</b> |                        |      |      |          |     |
| C10-H12··O4     | $3/2-x, -1/2+y, 1/4-z$ | 0.98 | 2.30 | 3.218(2) | 155 |
| *C18-H24··O2    |                        | 0.97 | 2.39 | 2.725(8) | 100 |
| C19-H27··O1     | $x, 1+y, z$            | 0.96 | 2.40 | 3.172(5) | 138 |
| *C12-H29··O4    |                        | 0.97 | 2.52 | 3.050(3) | 115 |
| C1-H30··O4      | $3/2-x, -1/2+y, 1/4-z$ | 0.98 | 2.58 | 3.403(2) | 141 |

*Other modified-proline-based ACEI structures*

|               |              |      |      |           |     |
|---------------|--------------|------|------|-----------|-----|
| <b>EDALEC</b> |              |      |      |           |     |
| *N1-H31··O3   |              | 0.83 | 2.24 | 2.797(18) | 124 |
| O6-H38··O8    | $x, -1+y, z$ | 0.84 | 2.42 | 2.723(14) | 102 |
| *O7-H39··O8   |              | 0.84 | 1.94 | 2.620(14) | 138 |
| O8-H40··O6    | $x, 1+y, z$  | 0.84 | 2.07 | 2.723(14) | 134 |
| *O8-H40··N3   |              | 0.84 | 2.18 | 2.480(10) | 101 |
| *N3-H42··O6   |              | 0.84 | 2.42 | 2.829(12) | 111 |

|                           |                      |          |          |           |          |
|---------------------------|----------------------|----------|----------|-----------|----------|
| C3-H3 <sup>00</sup> O4    | $I-x, -I/2+y, -z$    | 0.92     | 2.41     | 3.179(14) | 141      |
| *C8-H8 <sup>00</sup> O1   |                      | 0.92     | 2.21     | 2.760(15) | 118      |
| C11-H12 <sup>00</sup> N1  | $x, -I+y, z$         | 0.92     | 2.22     | 3.043(19) | 149      |
| C13-H16 <sup>00</sup> O1  | $x, I+y, z$          | 0.92     | 2.56     | 3.060(16) | 115      |
| C14-H18 <sup>00</sup> O1  | $x, I+y, z$          | 0.92     | 2.47     | 2.846(13) | 105      |
| C18-H23 <sup>00</sup> O7  | $x, -I+y, -I+z$      | 0.92     | 2.37     | 2.976(12) | 124      |
| C18-H23 <sup>00</sup> O8  | $x, -I+y, -I+z$      | 0.92     | 2.21     | 2.889(13) | 130      |
| C18-H24 <sup>00</sup> O7  | $2-x, -I/2+y, I-z$   | 0.92     | 2.31     | 3.217(11) | 171      |
| C19-H25 <sup>00</sup> O7  | $x, y, -I+z$         | 0.92     | 2.44     | 3.277(15) | 152      |
| *C19-H26 <sup>00</sup> O5 |                      | 0.92     | 2.34     | 2.898(16) | 119      |
| <b>FIFGEG</b>             |                      |          |          |           |          |
| *N2-H24 <sup>00</sup> O1  |                      | 0.74(2)  | 2.58(3)  | 2.803(3)  | 100(2)   |
| N2-H24 <sup>00</sup> O6   |                      | 0.74(2)  | 2.10(2)  | 2.783(4)  | 155(3)   |
| C11-H13 <sup>00</sup> O4  | $1/2+x, 1/2-y, -z$   | 0.960(6) | 2.566(5) | 3.442(5)  | 151.8(4) |
| <b>IQISAE</b>             |                      |          |          |           |          |
| *O3-H30 <sup>00</sup> N1  |                      | 0.95     | 2.27     | 2.745(14) | 110      |
| N2-H31 <sup>00</sup> O4   | $1/2-x, I-y, -I/2+z$ | 1.03     | 1.59     | 2.596(16) | 167      |
| C4-H5 <sup>00</sup> O5    | $-I/2+x, 3/2-y, I-z$ | 1.07     | 2.59     | 3.383(18) | 131      |
| *C6-H9 <sup>00</sup> O1   |                      | 1.05     | 2.53     | 3.217(18) | 122      |
| *C6-H10 <sup>00</sup> O5  |                      | 1.09     | 2.50     | 3.375(19) | 137      |
| C9-H12 <sup>00</sup> O1   | $x, y, I+z$          | 1.03     | 2.55     | 3.428(17) | 144      |
| *C19-H27 <sup>00</sup> O5 |                      | 1.09     | 2.30     | 2.939(16) | 115      |
| C24-H33 <sup>00</sup> O4  | $1/2-x, I-y, -I/2+z$ | 1.09     | 2.59     | 3.337(18) | 125      |
| <b>QQQWU</b>              |                      |          |          |           |          |
| O1-H1 <sup>00</sup> N2    | $I/2+x, 1/2-y, -z$   | 1.04(5)  | 1.58(5)  | 2.601(6)  | 168(5)   |
| *N2-H2 <sup>00</sup> O3   |                      | 0.78(3)  | 2.43(3)  | 2.829(5)  | 114(3)   |
| C3-H6 <sup>00</sup> O5    | $3/2-x, -y, I/1+z$   | 0.98     | 2.45     | 3.388(6)  | 161      |
| *C14-H20 <sup>00</sup> O5 |                      | 0.97     | 2.35     | 2.690(6)  | 100      |
| <b>RUWBAM</b>             |                      |          |          |           |          |
| N1-H13 <sup>00</sup> C11  |                      | 0.96(5)  | 2.42(4)  | 3.212(3)  | 140(4)   |
| N1-H14 <sup>00</sup> O4   | $2-x, 1/2+y, 1/2-z$  | 0.81(4)  | 2.11(4)  | 2.866(4)  | 155(4)   |
| O5-H15 <sup>00</sup> C11  | $2-x, -I/2+y, 1/2-z$ | 0.73(5)  | 2.26(5)  | 2.990(3)  | 175(6)   |
| O6-H32 <sup>00</sup> S1   | $I-x, -I/2+y, 1/2-z$ | 0.98(5)  | 2.51(5)  | 3.473(5)  | 169(4)   |
| O6-H33 <sup>00</sup> C11  | $-I+x, y, z$         | 1.05(12) | 2.32(12) | 3.327(5)  | 161(10)  |
| *C3-H3 <sup>00</sup> O1   |                      | 1.01(4)  | 2.60(3)  | 3.043(4)  | 107(3)   |
| *C2-H11 <sup>00</sup> O3  |                      | 0.92(4)  | 2.46(4)  | 2.879(5)  | 108(3)   |

|              |                                     |         |         |          |        |
|--------------|-------------------------------------|---------|---------|----------|--------|
| C9-H19...C11 | $2-x, \frac{1}{2}+y, \frac{1}{2}-z$ | 0.93(4) | 2.77(4) | 3.674(4) | 167(3) |
| C12-H24...O2 | $2-x, -1/2+y, \frac{1}{2}-z$        | 1.05(4) | 2.48(4) | 3.246(5) | 130(3) |
| C12-H26...O1 | $2-x, \frac{1}{2}+y, \frac{1}{2}-z$ | 1.00(5) | 2.51(5) | 3.497(5) | 170(4) |

**Table S10.** Geometrical parameters (Å and °) for the  $\pi$ -stacking moieties involved in the  $\pi$ ·· $\pi$  interactions for studied compounds.

| $CgI-CgJ^{a,b}$                                     | symmetry             | $Cg\cdots Cg^c$ | $Cg(I)-perp^d$ | $Cg(J)-perp^e$ | $\alpha^f$ | $\beta^g$ | $\gamma^h$ |
|-----------------------------------------------------|----------------------|-----------------|----------------|----------------|------------|-----------|------------|
| <b>Proline-based ACEI structures</b>                |                      |                 |                |                |            |           |            |
| CIYNIH                                              |                      |                 |                |                |            |           |            |
| $Cg2\cdots Cg2$                                     | $-x, -1/2+y, -1/2-z$ | 5.535(3)        | 3.561(2)       | -4.003(2)      | 87.3(3)    | 43.7      | 49.9       |
| DIVHOF01                                            |                      |                 |                |                |            |           |            |
| $Cg2\cdots Cg2$                                     | $1-x, -1/2+y, 1-z$   | 4.800(13)       | 1.667(8)       | 4.473(8)       | 50         | 21.3      | 69.7       |
| GERWUX01                                            |                      |                 |                |                |            |           |            |
| $Cg2\cdots Cg2$                                     | $2-x, 1/2+y, 2-z$    | 5.196(2)        | 1.8039(16)     | 4.2058(16)     | 48.12(18)  | 36.0      | 69.7       |
| GERXAE                                              |                      |                 |                |                |            |           |            |
| $Cg2\cdots Cg1$                                     | $1-x, 1/2+y, 2-z$    | 5.113(4)        | 0.194(3)       | 4.639(3)       | 63.6(4)    | 24.9      | 87.8       |
| $Cg2\cdots Cg2$                                     | $2-x, 1/2+y, 2-z$    | 5.420(3)        | 1.745(2)       | 4.126(2)       | 47.5(2)    | 40.4      | 71.2       |
| TUHMOY                                              |                      |                 |                |                |            |           |            |
| $Cg2\cdots Cg2$                                     | $2-x, -1/2+y, -z$    | 4.836(8)        | 1.870(5)       | 4.679(5)       | 56.3(6)    | 14.6      | 67.3       |
| TUHMUE                                              |                      |                 |                |                |            |           |            |
| $Cg3\cdots Cg3$                                     | $-1+x, y, z$         | 5.461(10)       | 3.033(7)       | -3.033(7)      | 0.0(8)     | 56.3      | 56.3       |
| $Cg5\cdots Cg3$                                     | $-x, -1/2+y, -z$     | 5.979(10)       | -1.345(6)      | -3.628(7)      | 73.9(8)    | 52.7      | 77.0       |
| $Cg5\cdots Cg5$                                     | $-1+x, y, z$         | 5.461(9)        | 3.015(7)       | -3.015(7)      | 0.0(8)     | 56.5      | 56.5       |
| $Cg5\cdots Cg6$                                     | $-1+x, y, z$         | 5.080(10)       | 1.608(7)       | -4.866(7)      | 75.4(8)    | 16.7      | 71.6       |
| $Cg6\cdots Cg6$                                     | $1+x, y, z$          | 5.461(10)       | 2.924(7)       | -2.924(7)      | 0.0(8)     | 57.6      | 57.6       |
| <b>Perindopril –derived compounds</b>               |                      |                 |                |                |            |           |            |
| UZOVAH03                                            |                      |                 |                |                |            |           |            |
| $Cg18\cdots Cg18$                                   | $1-x, 1/2+y, 1-z$    | 4.88(4)         | -1.96(4)       | 4.08(4)        | 41         | 33.4      | 66.4       |
| <b>Other modified-proline-based ACEI structures</b> |                      |                 |                |                |            |           |            |
| EDALEC                                              |                      |                 |                |                |            |           |            |
| $Cg3\cdots Cg3$                                     | $1-x, -1/2+y, -z$    | 4.888(7)        | 2.388(4)       | -3.413(4)      | 52.4(5)    | 45.7      | 60.8       |
| IQISAE                                              |                      |                 |                |                |            |           |            |
| $Cg2\cdots Cg2$                                     | $1/2-x, 2-y, -1/2+z$ | 5.156(7)        | 1.994(6)       | 4.287(6)       | 34.8(7)    | 33.7      | 67.2       |
| RUWBAM                                              |                      |                 |                |                |            |           |            |
| $Cg4\cdots Cg4$                                     | $1/2+x, 3/2-y, 1-z$  | 5.972(3)        | 0.2921(19)     | 4.2006(19)     | 43.7(2)    | 45.3      | 87.2       |

**Table S11.** Geometrical parameters (in Å and in °) for the other  $\pi$ -stacking moieties for studied compounds.

| $Y(X)-X(H)\cdots Cg$                                | symmetry             | $X(H)\cdots Cg$ | $Y(X)-X(H)\cdots Cg$ | $Y(X)\cdots Cg$ |
|-----------------------------------------------------|----------------------|-----------------|----------------------|-----------------|
| <b>Proline-based structures</b>                     |                      |                 |                      |                 |
| CIYNIH                                              |                      |                 |                      |                 |
| $C8-H9\cdots Cg2$                                   | $-1/2-x, 1-y, 1/2+z$ | 2.77(4)         | 139(3)               | 3.614(6)        |
| $C9-H12\cdots Cg2$                                  |                      | 2.91(4)         | 130(3)               | 3.610(6)        |
| DIVHOF01                                            |                      |                 |                      |                 |
| $C10-H2\cdots Cg2$                                  | $1-x, 1/2+y, 1-z$    | 2.71            | 144                  | 3.56(2)         |
| $C2-H21\cdots Cg2$                                  | $X, -1+y, z$         | 2.88            | 167                  | 3.91(2)         |
| GERWUX01                                            |                      |                 |                      |                 |
| $C15-H24\cdots Cg2$                                 | $1-x, 1/2+y, 1-z$    | 2.77            | 173                  | 3.753(4)        |
| GERXAE                                              |                      |                 |                      |                 |
| $C15-H20\cdots Cg2$                                 | $1-x, 1/2+y, 1-z$    | 2.727(19)       | 167.9(15)            | 3.691(12)       |
| GERXEI                                              |                      |                 |                      |                 |
| $C15-H20\cdots Cg2$                                 | $-1-x, 1/2+y, 1-z$   | 2.72(2)         | 152(2)               | 3.611(15)       |
| TUHMOY                                              |                      |                 |                      |                 |
| $C14-H18\cdots Cg2$                                 | $2-x, 1/2+y, -z$     | 2.84            | 137                  | 3.604(13)       |
| TUHMUE                                              |                      |                 |                      |                 |
| $C32-O8\cdots Cg6$                                  | $x, y, z$            | 3.665(13)       | 150.9(10)            | 4.766(18)       |
| <b>Other modified-proline-based ACEI structures</b> |                      |                 |                      |                 |
| EDALEC                                              |                      |                 |                      |                 |
| $C23-O5\cdots Cg2$                                  | $x, y, z$            | 2.825(13)       | 99.8(11)             | 3.280(16)       |
| FIFGEG                                              |                      |                 |                      |                 |
| $C5-H7\cdots Cg3$                                   | $1-x, -1/2+y, 1/2-z$ | 2.875(5)        | 167.9(5)             | 3.817(5)        |
| RUWBAM                                              |                      |                 |                      |                 |
| $C11-H23\cdots Cg4$                                 | $3/2-x, 2-y, -1/2+z$ | 2.68(5)         | 167(4)               | 3.682(5)        |
| $C22-H29\cdots Cg4$                                 | $X, 1+y, z$          | 2.88            | 142                  | 3.688(9)        |

**Table S12.** HS analysis (percent contribution of various types of the intermolecular interactions) of ACEI and their derivatives available in the CSD (above 0.5 %).

|                                                    | H··H | O··H/<br>H··O | N··H<br>/H··N | C··H<br>/H··C | C··C | C··O<br>/O··C | O··O | N··O<br>/O··N | O··S<br>/S··O | S··H<br>/H··S<br>[S··S] | Cl··H<br>/H··Cl | O··Na<br>/Na··O | H··Na<br>/Na··H |
|----------------------------------------------------|------|---------------|---------------|---------------|------|---------------|------|---------------|---------------|-------------------------|-----------------|-----------------|-----------------|
| <b>Proline structures</b>                          |      |               |               |               |      |               |      |               |               |                         |                 |                 |                 |
| PROLIN03                                           | 52.2 | 45.9          |               | 1.9           |      |               |      |               |               |                         |                 |                 |                 |
| NELSEC                                             | 31.4 | 43.4          |               | 2.9           |      |               |      |               | 3.4           | 18.2<br>[0.7]           | 0.7             |                 |                 |
| QANRUT                                             | 51.9 | 45.6          |               | 2.5           |      |               |      |               |               |                         |                 |                 |                 |
| <b>Proline-based ACEI structures</b>               |      |               |               |               |      |               |      |               |               |                         |                 |                 |                 |
| CIYNIH                                             | 46.5 | 39.1          |               | 12.9          |      |               |      |               |               |                         |                 |                 |                 |
| DIVHOF01                                           | 31.9 | 38.9          |               | 20            | 2    | 1.2           | 2.5  |               |               |                         |                 |                 |                 |
| GERXAE                                             | 59.2 | 29.1          |               | 10.3          |      |               |      |               |               |                         |                 |                 |                 |
| GERXEI                                             | 55.2 | 30.1          | 0.7           | 10.7          |      |               |      |               |               |                         |                 |                 |                 |
| GERWUX                                             | 59   | 30.3          | 0.5           | 10.2          |      |               |      |               |               |                         |                 |                 |                 |
| GERWUX01                                           | 57.6 | 32            |               | 10.4          |      |               |      |               |               |                         |                 |                 |                 |
| MCPRL01                                            | 54.6 | 33.3          |               | 0.6           |      |               |      |               |               | 10.9                    |                 |                 |                 |
| TUHMOY                                             | 69   | 14.8          |               | 7.5           |      |               |      |               |               |                         |                 | 6.5             | 1.5             |
| TUHMUE                                             | 49.8 | 12.6          |               | 19.9          |      | 0.9           |      |               |               | 10                      |                 | 4               | 0.6             |
| YOZTIS                                             | 54.4 | 34.5          |               | 1.4           |      |               |      |               | 0.7           | 8.7                     |                 |                 |                 |
| <b>Perindoprilat structures</b>                    |      |               |               |               |      |               |      |               |               |                         |                 |                 |                 |
| FEFKEI                                             | 62.9 | 36.1          |               | 0.9           |      |               | 0.2  |               |               |                         |                 |                 |                 |
| BECWIR<br>mol. 1                                   | 60.8 | 36            |               | 0.9           |      |               | 0.3  |               | 0.2           | 1.4                     |                 |                 |                 |
| BECWIR<br>mol. 2                                   | 64.2 | 34.2          |               | 0.8           |      |               | 0.4  |               |               |                         |                 |                 |                 |
| <b>Perindopril structures</b>                      |      |               |               |               |      |               |      |               |               |                         |                 |                 |                 |
| IVEGIAm.1                                          | 70.5 | 28.3          |               | 0.4           |      |               | 0.8  |               |               |                         |                 |                 |                 |
| IVEGIAm.2                                          | 73.8 | 23.2          |               | 0.4           |      |               | 2.6  | 0.1           |               |                         |                 |                 |                 |
| UZOWAH                                             | 74.1 | 24.4          | 0.3           |               |      |               | 0.4  |               |               |                         |                 |                 |                 |
| UZOWAH1                                            | 76.8 | 22.7          |               | 0.3           |      |               |      |               |               |                         |                 |                 |                 |
| UZOWAH3                                            | 76.6 | 22.6          | 0.1           | 0.6           |      | 0.1           |      |               |               |                         |                 |                 |                 |
| UZOVIPm1                                           | 70.2 | 28.7          |               | 0.4           |      |               | 0.7  |               |               |                         |                 |                 |                 |
| UZOVIPm2                                           | 73.8 | 23.2          |               | 0.4           |      |               | 2.5  | 0.1           |               |                         |                 |                 |                 |
| <b>DKP perindopril structures</b>                  |      |               |               |               |      |               |      |               |               |                         |                 |                 |                 |
| BILNAN mol.<br>1                                   | 77.3 | 20            | 0.8           | 0.7           | 0.1  | 0.2           | 0.1  |               |               |                         |                 |                 |                 |
| BILNAN mol.<br>2                                   | 74.5 | 22.7          | 0.9           | 0.8           | 0.1  | 0.2           | 0.1  |               |               |                         |                 |                 |                 |
| BILNAN01                                           | 77.9 | 20.7          | 0.7           | 0.7           |      |               |      |               |               |                         |                 |                 |                 |
| <b>Other modieif-proline-based ACEI structures</b> |      |               |               |               |      |               |      |               |               |                         |                 |                 |                 |
| EDALEC                                             | 58.5 | 27.2          |               | 4.3           |      | 1.6           | 0.7  |               |               |                         |                 |                 |                 |
| FIFGEG                                             | 37.5 | 34.1          |               | 16.7          |      | 4.1           | 5.2  | 0.6           |               |                         |                 |                 |                 |
| IQISAE                                             | 68.2 | 21.3          | 0.7           | 8.4           |      | 0.7           |      |               |               |                         |                 |                 |                 |
| IQISAE01                                           | 68.2 | 21.2          | 0.8           | 8.4           |      | 0.7           |      |               |               |                         |                 |                 |                 |
| QQQWAW                                             | 68.1 | 19            | 1.8           | 9.7           |      | 0.6           | 0.7  |               |               |                         |                 |                 |                 |
| RUWBAM                                             | 58.1 | 17.5          |               | 8.5           |      | 0.5           | 1.4  |               | 1             | 7.9                     | 5               |                 |                 |

**Table S13.** HS parameters for analyzed structures.

|                           | Volume<br>$V [\text{Å}^3]$ | Globularity<br>$G$ | Surface Area<br>$A [\text{Å}^2]$<br>$(A/V [\text{Å}^{-1}])$ | Asphericity<br>$\Omega$ |
|---------------------------|----------------------------|--------------------|-------------------------------------------------------------|-------------------------|
| <b>Proline structures</b> |                            |                    |                                                             |                         |
| PROLIN03                  | 131.38                     | 0.883              | 141.47 (1.07)                                               | 0.031                   |
| NELSEC                    | 136.13                     | 0.887              | 144.26 (1.06)                                               | 0.03                    |

|                                                            |         |       |               |       |
|------------------------------------------------------------|---------|-------|---------------|-------|
| QANRUT                                                     | 131.90  | 0.886 | 141.39 (1.07) | 0.028 |
| <b><i>Proline-based ACEI structures</i></b>                |         |       |               |       |
| CIYNIH                                                     | 424.13  | 0.719 | 379.55 (0.89) | 0.337 |
| DIVHOF01                                                   | 631.7   | 0.702 | 506.89 (0.80) | 0.100 |
| GERWUX01                                                   | 500.59  | 0.693 | 439.80 (0.88) | 0.185 |
| GERXAE                                                     | 535.75  | 0.700 | 455.64 (0.85) | 0.167 |
| GERXEI                                                     | 544.81  | 0.711 | 453.84(0.83)  | 0.181 |
|                                                            |         |       |               |       |
| MCPRL01                                                    | 255.96  | 0.797 | 244.73 (0.96) | 0.135 |
|                                                            |         |       |               |       |
| TUHMOY                                                     | 789.2   | 0.649 | 636.65 (0.81) | 0.231 |
| TUHMUE                                                     | 1075.52 | 0.604 | 840.94 (0.78) | 0.172 |
| <b><i>Perindoprilat structures</i></b>                     |         |       |               |       |
| BECWIR mol. 1                                              | 453.29  | 0.749 | 381.19 (0.84) | 0.123 |
| BECWIR mol. 2                                              | 444.07  | 0.733 | 384.22 (0.86) | 0.135 |
| FEFKEI                                                     | 441.21  | 0.738 | 379.54 (0.86) | 0.140 |
| <b><i>Perindopril structures</i></b>                       |         |       |               |       |
| IVEGIA                                                     | 485.94  | 0.767 | 389.82 (0.80) | 0.046 |
| UZOVAH                                                     | 484.07  | 0.780 | 382.09 (0.79) | 0.057 |
| UZOVAH03                                                   | 514.95  | 0.728 | 426.52 (0.83) | 0.115 |
| <b><i>DKP perindopril structures</i></b>                   |         |       |               |       |
| BILNAN                                                     | 487.5   | 0.788 | 380.13 (0.78) | 0.084 |
| BILNAN02                                                   | 480.08  | 0.788 | 376.22 (0.78) | 0.093 |
| <b><i>Other modified-proline-based ACEI structures</i></b> |         |       |               |       |
| QOQWAW                                                     | 566.30  | 0.737 | 448.93 (0.79) | 0.084 |
| EDALEC                                                     | 575.15  | 0.726 | 460.95 (0.80) | 0.178 |
| FIFGEG                                                     | 526.06  | 0.716 | 440.01 (0.83) | 0.280 |
| IQISAE                                                     | 562.91  | 0.719 | 458.42 (0.81) | 0.083 |
| RUWBAM                                                     | 585.61  | 0.658 | 514.14 (0.88) | 0.147 |

**Table S14.** HS interaction surfaces, random contacts and enrichment ratios for all analyzed structures. Values in italics are derived from the HS analysis by CrystalExplorer. ER were calculated for contacts larger than 0.9 %.

***Proline structures:***

**PROLIN03**

|             | H     | O                          | C    |
|-------------|-------|----------------------------|------|
| H           | 52.2  | <i>HS contacts [%]</i>     |      |
| O           | 45.9  |                            |      |
| C           | 1.9   |                            |      |
| Surface (%) | 76.1  | 22.95                      | 0.95 |
| H           | 57.91 | <i>Random contacts [%]</i> |      |
| O           | 34.92 |                            |      |

|   |              |                         |  |
|---|--------------|-------------------------|--|
| C | 1.45         |                         |  |
| H | <b>0.901</b> | <b>Enrichment ratio</b> |  |
| O | <b>1.314</b> |                         |  |
| C | <b>1.31</b>  |                         |  |

### QANRUT

|             | H           | O    | C    |
|-------------|-------------|------|------|
| H           | 51.9        |      |      |
| O           | 45.6        |      |      |
| C           | 2.5         |      |      |
| Surface (%) | 75.95       | 22.8 | 1.25 |
| H           | 57.68       |      |      |
| O           | 34.6        |      |      |
| C           | 1.89        |      |      |
| H           | <b>0.9</b>  |      |      |
| O           | <b>1.32</b> |      |      |
| C           | <b>1.32</b> |      |      |

### NELSEC

|             | H           | O           | C    | S    |
|-------------|-------------|-------------|------|------|
| H           | 31.4        |             |      |      |
| O           | 43.4        |             |      |      |
| C           | 2.9         |             |      |      |
| S           | 18.2        | 3.4         |      |      |
| Surface (%) | 63.65       | 23.4        | 1.45 | 11.5 |
| H           | 40.51       |             |      |      |
| O           | 29.78       |             |      |      |
| C           | 1.85        |             |      |      |
| S           | 14.63       | 5.38        |      |      |
| H           | <b>0.78</b> |             |      |      |
| O           | <b>1.46</b> |             |      |      |
| C           | <b>1.57</b> |             |      |      |
| S           | <b>1.24</b> | <b>0.63</b> |      |      |

### *Perindopril-derived structures:*

#### FEFKEI

|             | H           | O     | C    |
|-------------|-------------|-------|------|
| H           | 62.9        |       |      |
| O           | 36.1        |       |      |
| C           | 0.9         |       |      |
| Surface (%) | 81.4        | 18.05 | 0.45 |
| H           | 66.25       |       |      |
| O           | 29.38       |       |      |
| C           | 0.73        |       |      |
| H           | <b>0.95</b> |       |      |
| O           | <b>1.23</b> |       |      |
| C           | <b>1.23</b> |       |      |

#### BECWIR

|             | H           | O  | C    | S   |
|-------------|-------------|----|------|-----|
| H           | 60.8        |    |      |     |
| O           | 36          |    |      |     |
| C           | 0.9         |    |      |     |
| S           | 1.4         |    |      |     |
| Surface (%) | 61.95       | 18 | 0.45 | 0.7 |
| H           | 38.37       |    |      |     |
| O           | 22.3        |    |      |     |
| C           | 0.56        |    |      |     |
| S           | 0.87        |    |      |     |
| H           | <b>1.58</b> |    |      |     |
| O           | <b>1.61</b> |    |      |     |
| C           | <b>1.61</b> |    |      |     |
| S           | <b>1.61</b> |    |      |     |

#### BILNAN

|             | H     | O     | N    |
|-------------|-------|-------|------|
| H           | 74.5  |       |      |
| O           | 22.7  |       |      |
| N           | 0.9   |       |      |
| Surface (%) | 86.3  | 11.35 | 0.45 |
| H           | 74.47 |       |      |



|   |             |  |  |
|---|-------------|--|--|
| O | 19.6        |  |  |
| N | 0.78        |  |  |
| H | <b>1.0</b>  |  |  |
| O | <b>1.16</b> |  |  |
| N | <b>1.15</b> |  |  |

#### BILNAN01

|             | H          | O     |
|-------------|------------|-------|
| H           | 77.9       |       |
| O           | 20.7       |       |
| Surface (%) | 88.25      | 10.35 |
| H           | 77.88      |       |
| O           | 18.26      |       |
| H           | <b>1.0</b> |       |
| O           | <b>1.1</b> |       |

#### IVEGIA

|             | H           | O    |
|-------------|-------------|------|
| H           | 73.8        |      |
| O           | 23.2        | 2.6  |
| Surface (%) | 85.4        | 14.2 |
| H           | 73          |      |
| O           | 24.25       | 2    |
| H           | <b>1</b>    |      |
| O           | <b>0.96</b> | 1.3  |

#### UZOWAH

|             | H           | O    |
|-------------|-------------|------|
| H           | 74.1        |      |
| O           | 24.4        |      |
| Surface (%) | 86.3        | 12.2 |
| H           | 74.4        |      |
| O           | 21.06       |      |
| H           | <b>0.96</b> |      |
| O           | <b>1.16</b> |      |

#### UZOWAH03

|             | H           | O    |
|-------------|-------------|------|
| H           | 76.6        |      |
| O           | 22.6        |      |
| Surface (%) | 87.9        | 11.3 |
| H           | 77.26       |      |
| O           | 19.86       |      |
| H           | <b>1.0</b>  |      |
| O           | <b>1.14</b> |      |

#### *Other proline-based ACEI structures:*

#### CIYNIH

|             | H           | O     | C    |
|-------------|-------------|-------|------|
| H           | 46.5        |       |      |
| O           | 39.1        |       |      |
| C           | 12.9        |       |      |
| Surface (%) | 72.5        | 19.55 | 6.45 |
| H           | 52.56       |       |      |
| O           | 28.34       |       |      |
| C           | 9.35        |       |      |
| H           | <b>0.88</b> |       |      |
| O           | <b>1.38</b> |       |      |
| C           | <b>1.38</b> |       |      |

#### DIVHOF01

|             | H           | O     | C    |
|-------------|-------------|-------|------|
| H           | 31.9        |       |      |
| O           | 38.9        | 2.5   |      |
| C           | 20          | 1.2   | 2    |
| Surface (%) | 61.35       | 22.55 | 12.6 |
| H           | 37.64       |       |      |
| O           | 28.48       | 5.08  | 5.67 |
| C           | 15.91       |       |      |
| H           | <b>0.85</b> |       |      |

|   |      |      |      |
|---|------|------|------|
| O | 1.37 | 2.03 |      |
| C | 1.25 | 0.21 | 1.25 |

#### EDALEC

|             | H     | O    | C    |
|-------------|-------|------|------|
| H           | 58.5  |      |      |
| O           | 27.2  |      |      |
| C           | 4.3   | 1.6  |      |
| Surface (%) | 74.25 | 14.4 | 2.95 |
| H           | 55.1  |      |      |
| O           | 21.4  |      |      |
| C           | 4.39  | 0.85 |      |
| H           | 1.06  |      |      |
| O           | 1.27  |      |      |
| C           | 0.98  | 1.88 |      |

#### FIFGEG

|             | H     | O    | C    |
|-------------|-------|------|------|
| H           | 37.5  |      |      |
| O           | 34.1  |      |      |
| C           | 16.7  |      |      |
| Surface (%) | 62.9  | 24.3 | 10.4 |
| H           | 39.56 |      |      |
| O           | 30.56 | 5.9  | 5.05 |
| C           | 13.1  |      |      |
| H           | 0.95  |      |      |
| O           | 1.1   | 0.88 | 0.81 |
| C           | 1.27  |      |      |

#### GERXAE

|             | H     | O     | C    |
|-------------|-------|-------|------|
| H           | 59.2  |       |      |
| O           | 29.1  |       |      |
| C           | 10.3  |       |      |
| Surface (%) | 78.9  | 14.55 | 5.15 |
| H           | 62.25 |       |      |
| O           | 22.95 |       |      |
| C           | 8.12  |       |      |
| H           | 0.95  |       |      |
| O           | 1.27  |       |      |
| C           | 1.27  |       |      |

#### GERXEI

|             | H     | O     | C    |
|-------------|-------|-------|------|
| H           | 55.2  |       |      |
| O           | 30.1  |       |      |
| C           | 10.7  |       |      |
| Surface (%) | 75.6  | 15.05 | 5.35 |
| H           | 57.15 |       |      |
| O           | 22.75 |       |      |
| C           | 8.08  |       |      |
| H           | 1.03  |       |      |
| O           | 1.28  |       |      |
| C           | 1.27  |       |      |

#### GERWUX01

|             | H     | O  | C   |
|-------------|-------|----|-----|
| H           | 57.6  |    |     |
| O           | 32    |    |     |
| C           | 10.4  |    |     |
| Surface (%) | 73.6  | 16 | 5.2 |
| H           | 54.17 |    |     |
| O           | 23.55 |    |     |
| C           | 7.65  |    |     |
| H           | 1.06  |    |     |
| O           | 1.36  |    |     |
| C           | 1.36  |    |     |

#### IQISAE

|             | H     | O     | C   |
|-------------|-------|-------|-----|
| H           | 68.2  |       |     |
| O           | 21.3  |       |     |
| C           | 8.4   |       |     |
| Surface (%) | 83.05 | 10.65 | 4.2 |

|   |             |  |  |
|---|-------------|--|--|
| H | 68.97       |  |  |
| O | 17.68       |  |  |
| C | 6.97        |  |  |
| H | <b>0.98</b> |  |  |
| O | <b>1.2</b>  |  |  |
| C | <b>1.2</b>  |  |  |

### QQWAU

|             | H           | O   | N   | C    |
|-------------|-------------|-----|-----|------|
| H           | 68.1        |     |     |      |
| O           | 19          |     |     |      |
| N           | 1.8         |     |     |      |
| C           | 9.7         |     |     |      |
| Surface (%) | 83.35       | 9.5 | 0.9 | 4.85 |
| H           | 69.47       |     |     |      |
| O           | 15.84       |     |     |      |
| N           | 1.5         |     |     |      |
| C           | 8.08        |     |     |      |
| H           | <b>0.71</b> |     |     |      |
| O           | <b>1.2</b>  |     |     |      |
| N           | <b>1.2</b>  |     |     |      |
| C           | <b>1.2</b>  |     |     |      |

### RUWBAM

|             | H           | O           | C    | S    | Cl  |
|-------------|-------------|-------------|------|------|-----|
| H           | 58.1        |             |      |      |     |
| O           | 17.5        |             | 1.4  |      |     |
| C           | 8.5         |             |      |      |     |
| S           | 7.9         | 1           |      |      |     |
| Cl          | 5           |             |      |      |     |
| Surface (%) | 77.55       | 9.45        | 4.95 | 3.95 | 2.5 |
| H           | 60.14       |             |      |      |     |
| O           | 14.65       |             |      |      |     |
| C           | 7.67        |             |      |      |     |
| S           | 6.12        | 0.75        |      |      |     |
| Cl          | 3.87        |             |      |      |     |
| H           | <b>0.96</b> |             |      |      |     |
| O           | <b>1.19</b> |             |      |      |     |
| C           | <b>1.10</b> | <b>1.5</b>  |      |      |     |
| S           | <b>1.28</b> | <b>1.33</b> |      |      |     |
| Cl          | <b>1.29</b> |             |      |      |     |

### TUHMOY

|             | H           | O           | C    | Na |
|-------------|-------------|-------------|------|----|
| H           | 69          |             |      |    |
| O           | 14.8        |             |      |    |
| C           | 7.5         |             |      |    |
| Na          | 1.5         | 6.5         |      |    |
| Surface (%) | 80.9        | 10.65       | 3.75 | 4  |
| H           | 65.45       |             |      |    |
| O           | 17.23       |             |      |    |
| C           | 6.06        |             |      |    |
| Na          | 6.47        | 0.852       |      |    |
| H           | <b>1.05</b> |             |      |    |
| O           | <b>0.86</b> |             |      |    |
| C           | <b>1.24</b> |             |      |    |
| Na          | <b>0.23</b> | <b>7.62</b> |      |    |

### TUHMUE

|             | H           | O          | C    | S | Na |
|-------------|-------------|------------|------|---|----|
| H           | 49.8        |            |      |   |    |
| O           | 12.6        |            |      |   |    |
| C           | 19.9        | 0.9        |      |   |    |
| S           | 10          |            |      |   |    |
| Na          |             | 4          |      |   |    |
| Surface (%) | 71.05       | 8.75       | 10.4 | 5 | 2  |
| H           | 50.48       |            |      |   |    |
| O           | 12.43       |            |      |   |    |
| C           | 14.77       | 1.82       |      |   |    |
| S           | 7.1         |            |      |   |    |
| Na          |             | 0.35       |      |   |    |
| H           | <b>1</b>    |            |      |   |    |
| O           | <b>1.01</b> |            |      |   |    |
| C           | <b>1.35</b> |            |      |   |    |
| S           | <b>1.41</b> | <b>0.5</b> |      |   |    |

|    |  |       |  |  |
|----|--|-------|--|--|
| Na |  | 11.43 |  |  |
|----|--|-------|--|--|

### MCPRL01

|             | H           | O     | S    |
|-------------|-------------|-------|------|
| H           | 54.6        |       |      |
| O           | 33.3        |       |      |
| S           | 10.9        |       |      |
| Surface (%) | 76.7        | 16.65 | 5.45 |
| H           | 57.91       |       |      |
| O           | 25.54       |       |      |
| S           | 8.36        |       |      |
| H           | <b>0.94</b> |       |      |
| O           | <b>1.30</b> |       |      |
| S           | <b>0.77</b> |       |      |

### YOZTIS

|             | H           | O     | C   | S    |
|-------------|-------------|-------|-----|------|
| H           | 54.4        |       |     |      |
| O           | 34.5        |       |     |      |
| C           | 1.4         |       |     |      |
| S           | 8.7         |       |     |      |
| Surface (%) | 76.7        | 17.25 | 0.7 | 4.35 |
| H           | 58.82       |       |     |      |
| O           | 26.46       |       |     |      |
| C           | 1.07        |       |     |      |
| S           | 6.67        |       |     |      |
| H           | <b>0.93</b> |       |     |      |
| O           | <b>1.3</b>  |       |     |      |
| C           | <b>1.3</b>  |       |     |      |
| S           | <b>1.3</b>  |       |     |      |

**Table S15.** Supramolecular synthons resulting from three types of proline-based tectons observed in ACEI structures.

|                                                                                                                                                                                                                               |                                                                                                                                                                                                                                                                                                                                                                                                                                                                                                                                                                                                                                                                                                                                                                                                                                                                                                                                                                                                                                                                                                                                                                                                                                                                                                                                                                                                                                                                              |
|-------------------------------------------------------------------------------------------------------------------------------------------------------------------------------------------------------------------------------|------------------------------------------------------------------------------------------------------------------------------------------------------------------------------------------------------------------------------------------------------------------------------------------------------------------------------------------------------------------------------------------------------------------------------------------------------------------------------------------------------------------------------------------------------------------------------------------------------------------------------------------------------------------------------------------------------------------------------------------------------------------------------------------------------------------------------------------------------------------------------------------------------------------------------------------------------------------------------------------------------------------------------------------------------------------------------------------------------------------------------------------------------------------------------------------------------------------------------------------------------------------------------------------------------------------------------------------------------------------------------------------------------------------------------------------------------------------------------|
| 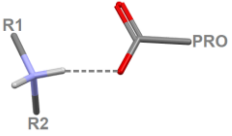 <p>(NH<sub>2</sub><sup>+</sup> PRO) N-H...O=C(COO<sup>-</sup> PRO)</p> <p>(NH<sub>2</sub><sup>+</sup>) N-H...O=C(COO<sup>-</sup> PRO)</p> | <p><b>PROLIN03 (III):</b><br/>C(5), C<sub>2</sub>(6), C<sub>2</sub>(9), C<sub>2</sub>(10), C<sub>3</sub>(14), C<sub>4</sub>(16), R<sub>4</sub>(16)</p> <p><b>QANRUT (III):</b><br/>C(5), C<sub>2</sub>(9), C<sub>2</sub>(10), C<sub>2</sub>(11), C<sub>3</sub>(14), C<sub>4</sub>(18), R<sub>2</sub>(8), R<sub>3</sub>(14), R<sub>4</sub>(16), R<sub>4</sub>(18), R<sub>4</sub>(20), R<sub>5</sub>(19), R<sub>6</sub>(18)</p> <p><b>NELSEC (III):</b><br/>C(5), C<sub>2</sub>(8), C<sub>2</sub>(9), C<sub>2</sub>(10), C<sub>2</sub>(11), C<sub>3</sub>(16), C<sub>4</sub>(17), C<sub>4</sub>(18), R<sub>3</sub>(11), R<sub>3</sub>(16), R<sub>4</sub>(16), R<sub>4</sub>(17)</p>                                                                                                                                                                                                                                                                                                                                                                                                                                                                                                                                                                                                                                                                                                                                                                                            |
|  <p>(NH<sub>3</sub><sup>+</sup>) N-H...O=C(COO<sup>-</sup> PRO)</p>                                                                        | <p><b>DIVHOF01 (II):</b><br/>C(8), C<sub>2</sub>(11), C<sub>2</sub>(13), C<sub>2</sub>(14), C<sub>2</sub>(15), R<sub>3</sub>(19), D<sub>3</sub>(15), D<sub>3</sub>(16), D<sub>3</sub>(17), D<sub>3</sub>(19)</p> <p><b>IVEGIA (II):</b><br/>D(2), D<sub>2</sub>(5), D<sub>2</sub>(12), D<sub>2</sub>(14), D<sub>3</sub>(20)</p> <p><b>UZOVAH03 (II): D(2)</b></p> <p><b>GERXAE (II):</b> C(12), C<sub>1</sub>(4), C<sub>2</sub>(10), C<sub>2</sub>(12), C<sub>2</sub>(18), C<sub>2</sub>(19), C<sub>2</sub>(20), R<sub>2</sub>(10), R<sub>2</sub>(12), R<sub>2</sub>(19), R<sub>2</sub>(16), D<sub>3</sub>(17), D<sub>3</sub>(19)</p> <p><b>GERXEI (II):</b> C(12), C<sub>2</sub>(12), C<sub>2</sub>(17), C<sub>2</sub>(18), C<sub>2</sub>(19), R<sub>2</sub>(12), R<sub>2</sub>(19)</p> <p><b>GERWUX01 (II):</b> C(12), C<sub>2</sub>(10), C<sub>2</sub>(18), C<sub>2</sub>(19), C<sub>2</sub>(20), R<sub>2</sub>(10), R<sub>2</sub>(19), D<sub>3</sub>(19)</p>                                                                                                                                                                                                                                                                                                                                                                                                                                                                                                             |
|  <p>(C<sub>cycl</sub> PRO) C-H...O=C(COO<sup>-</sup> PRO)</p>                                                                              | <p><b>PROLIN03 (III):</b> C(4), C<sub>2</sub>(9), C<sub>3</sub>(14)</p> <p><b>NELSEC (III):</b> C(6), C<sub>2</sub>(7), C<sub>2</sub>(10), C<sub>2</sub>(11), C<sub>3</sub>(16), C<sub>4</sub>(17), C<sub>4</sub>(18), R<sub>3</sub>(16)</p> <p><b>QANRUT (III):</b> C(4), C(5), C(6), C<sub>2</sub>(9), C<sub>2</sub>(10), C<sub>2</sub>(11), C<sub>3</sub>(14), C<sub>3</sub>(17), C<sub>4</sub>(18), R<sub>3</sub>(14), R<sub>3</sub>(17), R<sub>4</sub>(16), R<sub>4</sub>(18), R<sub>4</sub>(20), R<sub>5</sub>(19), R<sub>6</sub>(18)</p> <p><b>FIFGEG (II):</b> C(5), C<sub>2</sub>(14), D<sub>3</sub>(18)</p> <p><b>GERXAE (II):</b> C(6), C(9), C<sub>2</sub>(14), C<sub>2</sub>(16), C<sub>2</sub>(17), C<sub>2</sub>(18), C<sub>2</sub>(19), R<sub>2</sub>(14), R<sub>2</sub>(16), R<sub>2</sub>(17), R<sub>2</sub>(19), D<sub>3</sub>(11), D<sub>3</sub>(15)</p> <p><b>GERXEI (II):</b> C<sub>1</sub>(8), C<sub>1</sub>(10), C<sub>1</sub>(11), C<sub>2</sub>(13), C<sub>2</sub>(14), C<sub>2</sub>(15), C<sub>2</sub>(16), C<sub>2</sub>(17), C<sub>2</sub>(18), C<sub>2</sub>(19), C<sub>2</sub>(20), R<sub>2</sub>(13), R<sub>2</sub>(14), R<sub>2</sub>(17), R<sub>2</sub>(19), R<sub>2</sub>(19), R<sub>2</sub>(20), R<sub>3</sub>(17), R<sub>3</sub>(19), R<sub>3</sub>(20)</p> <p><b>GERWUX01 (II):</b><br/>C(6), C<sub>2</sub>(16), C<sub>2</sub>(17), C<sub>2</sub>(18), R<sub>2</sub>(16), R<sub>2</sub>(17), D<sub>3</sub>(11), D<sub>3</sub>(17)</p> |
| <p>(C<sub>cycl</sub>) C-H...O=C(COO<sup>-</sup> PRO)</p>                                                                                                                                                                      | <p><b>EDALEC (II):</b> C(15), C<sub>2</sub>(19)</p> <p><b>GERXEI (II):</b> C(15), C<sub>2</sub>(16), C<sub>2</sub>(17), C<sub>2</sub>(18), C<sub>2</sub>(19), C<sub>2</sub>(20)</p>                                                                                                                                                                                                                                                                                                                                                                                                                                                                                                                                                                                                                                                                                                                                                                                                                                                                                                                                                                                                                                                                                                                                                                                                                                                                                          |
| <p>(C) C-H...O=C(COO<sup>-</sup> PRO)</p>                                                                                                                                                                                     | <p><b>FIFGEG (II):</b> C(9), C<sub>2</sub>(14), C<sub>2</sub>(17), D<sub>3</sub>(14), D<sub>3</sub>(16)</p> <p><b>GERWUX01 (II):</b> C(10), C<sub>2</sub>(16), C<sub>2</sub>(17), R<sub>3</sub>(16), R<sub>3</sub>(20), D<sub>3</sub>(17), D<sub>3</sub>(19)</p>                                                                                                                                                                                                                                                                                                                                                                                                                                                                                                                                                                                                                                                                                                                                                                                                                                                                                                                                                                                                                                                                                                                                                                                                             |
|                                                                                                                                            | <p><b>PROLIN03 (III):</b> C<sub>2</sub>(4), C<sub>3</sub>(14), R<sub>3</sub>(14)</p> <p><b>QANRUT (III):</b> C<sub>3</sub>(14), R<sub>3</sub>(14), R<sub>6</sub>(18)</p>                                                                                                                                                                                                                                                                                                                                                                                                                                                                                                                                                                                                                                                                                                                                                                                                                                                                                                                                                                                                                                                                                                                                                                                                                                                                                                     |

|                                                                                                                                                                                                                                                                                         |                                                                                                                                                                                                                                                                                                                                                                                    |
|-----------------------------------------------------------------------------------------------------------------------------------------------------------------------------------------------------------------------------------------------------------------------------------------|------------------------------------------------------------------------------------------------------------------------------------------------------------------------------------------------------------------------------------------------------------------------------------------------------------------------------------------------------------------------------------|
| $[(\text{NH}_2^+ \text{PRO})\text{N-H}]_2 \cdots \text{O}=\text{C}(\text{COO}^- \text{PRO})$ 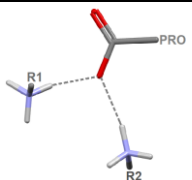                                                                                                           | <u>IVEGIA (II)</u> : C <sup>2</sup> <sub>2</sub> (6), D <sup>1</sup> <sub>2</sub> (3)<br><u>UZOVAH03 (II)</u> : C <sup>1</sup> <sub>2</sub> (4), C <sup>2</sup> <sub>2</sub> (6)<br><u>GERXEI (II)</u> : C <sup>1</sup> <sub>2</sub> (4), R <sup>2</sup> <sub>3</sub> (16)<br><u>GERWUX01 (II)</u> : C <sup>1</sup> <sub>2</sub> (4), R <sup>2</sup> <sub>3</sub> (16)             |
| $[(\text{NH}_3^+) \text{N-H}]_2 \cdots \text{O}=\text{C}(\text{COO}^- \text{PRO})$                                                                                                                      | <u>QANRUT (III)</u> : C <sup>1</sup> <sub>2</sub> (6), C <sup>3</sup> <sub>4</sub> (17), R <sup>3</sup> <sub>4</sub> (17)                                                                                                                                                                                                                                                          |
| $[(\text{C}_{\text{cycl}} \text{PRO})\text{C-H}]_2 \cdots \text{O}=\text{C}(\text{COO}^- \text{PRO})$                                                                                                                                                                                   | <u>GERXEI (II)</u> : C <sup>1</sup> <sub>2</sub> (15)                                                                                                                                                                                                                                                                                                                              |
| $(\text{C}_{\text{cycl}} \text{PRO})\text{C-H} \cdots \text{O}=\text{C}(\text{COO}^- \text{PRO})$<br>$(\text{C}_{\text{cycl}} \text{PRO})\text{C-H} \cdots \text{O}=\text{C}(\text{COO}^- \text{PRO})$                                                                                  | <u>FIFGEG (II)</u> : R <sup>1</sup> <sub>2</sub> (10)                                                                                                                                                                                                                                                                                                                              |
| $(\text{C}_{\text{cycl}} \text{PRO})\text{C-H} \cdots \text{O}=\text{C}(\text{COO}^- \text{PRO})$<br>$(\text{C}_{\text{cycl}} \text{PRO})\text{C-H} \cdots \text{O}=\text{C}(\text{COO}^- \text{PRO})$  | <u>PROLIN03 (III)</u> : C <sup>1</sup> <sub>2</sub> (5), R <sup>1</sup> <sub>2</sub> (5), R <sup>3</sup> <sub>4</sub> (14)<br><u>QANRUT (III)</u> : C <sup>1</sup> <sub>2</sub> (5), C <sup>2</sup> <sub>2</sub> (7), R <sup>2</sup> <sub>3</sub> (9)<br><u>NELSEC (III)</u> : C <sup>1</sup> <sub>2</sub> (5), C <sup>3</sup> <sub>4</sub> (16), R <sup>3</sup> <sub>4</sub> (16) |
| $(\text{NH}_2^+ \text{PRO})\text{N-H} \cdots \text{O}=\text{C}(\text{COO}^- \text{PRO})$<br>$(\text{C}_{\text{cycl}} \text{PRO})\text{C-H} \cdots \text{O}=\text{C}(\text{COO}^- \text{PRO})$          | <u>GERWUX01 (II)</u> : C <sup>1</sup> <sub>2</sub> (12)                                                                                                                                                                                                                                                                                                                            |
| $(\text{NH}_3^+) \text{N-H} \cdots \text{O}=\text{C}(\text{COO}^- \text{PRO})$<br>$(\text{C}_{\text{cycl}} \text{PRO})\text{C-H} \cdots \text{O}=\text{C}(\text{COO}^- \text{PRO})$                   | <u>GERXEI (II)</u> : C <sup>1</sup> <sub>2</sub> (17)                                                                                                                                                                                                                                                                                                                              |
| $(\text{NH}_3^+) \text{N-H} \cdots \text{O}=\text{C}(\text{COO}^- \text{PRO})$<br>$(\text{C}_{\text{cycl}} \text{PRO})\text{C-H} \cdots \text{O}=\text{C}(\text{COO}^- \text{PRO})$                                                                                                     | <u>GERWUX01 (II)</u> : R <sup>1</sup> <sub>2</sub> (6)                                                                                                                                                                                                                                                                                                                             |
|                                                                                                                                                                                                       | <u>PROLIN03 (III)</u> : R <sup>2</sup> <sub>1</sub> (4)<br><u>NELSEC (III)</u> : C <sup>2</sup> <sub>2</sub> (6), R <sup>3</sup> <sub>3</sub> (11), R <sup>4</sup> <sub>4</sub> (16)                                                                                                                                                                                               |
| $[(\text{NH}_2^+ \text{cycl})\text{N-H}]_2 \cdots \text{O}=\text{C}(\text{COO}^- \text{PRO})$                                                                                                                                                                                           | <u>GERXAE, GERXEI, GERWUX01 (II)</u> : C <sup>2</sup> <sub>2</sub> (6)                                                                                                                                                                                                                                                                                                             |
| $[(\text{NH}_3^+) \text{N-H}]_2 \cdots \text{O}=\text{C}(\text{COO}^- \text{PRO})$                                                                                                                    | <u>QANRUT (III)</u> : R <sup>3</sup> <sub>3</sub> (11), R <sup>4</sup> <sub>4</sub> (16)                                                                                                                                                                                                                                                                                           |
| $[(\text{C}_{\text{cycl}} \text{PRO})\text{C-H}]_2 \cdots \text{O}=\text{C}(\text{COO}^- \text{PRO})$                                                                                                 | <u>GERWUX01 (II)</u> : C <sup>2</sup> <sub>2</sub> (12)                                                                                                                                                                                                                                                                                                                            |
| $(\text{C}_{\text{cycl}} \text{PRO})\text{C-H} \cdots \text{O}=\text{C}(\text{COO}^- \text{PRO})$<br>$(\text{C}_{\text{cycl}} \text{PRO})\text{C-H} \cdots \text{O}=\text{C}(\text{COO}^- \text{PRO})$                                                                                  |                                                                                                                                                                                                                                                                                                                                                                                    |

|                                                                                                                                                                                                                                                                                                                                                                                   |                                                                                                                                                                                                                                                                                                                                                                                                                                                                                                                                                                                                                                                      |
|-----------------------------------------------------------------------------------------------------------------------------------------------------------------------------------------------------------------------------------------------------------------------------------------------------------------------------------------------------------------------------------|------------------------------------------------------------------------------------------------------------------------------------------------------------------------------------------------------------------------------------------------------------------------------------------------------------------------------------------------------------------------------------------------------------------------------------------------------------------------------------------------------------------------------------------------------------------------------------------------------------------------------------------------------|
| 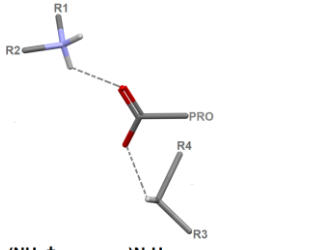 <p><math>(\text{NH}_2^+ \text{cycl PRO})\text{N}-\text{H} \cdots \text{O}=\text{C}(\text{COO}^- \text{PRO})</math><br/> <math>(\text{Ccycl PRO})\text{C}-\text{H} \cdots \text{O}=\text{C}(\text{COO}^- \text{PRO})</math></p>                                                                    | <p><u>PROLIN03 (III)</u>: <math>\text{R}_2^2(7)</math><br/> <u>QANRUT (III)</u>: <math>\text{C}^1_2(5), \text{C}^2_2(7), \text{C}^4_4(18), \text{R}^2_2(8), \text{R}^4_4(16)</math><br/> <u>NELSEC (III)</u>: <math>\text{C}^4_4(18)</math></p>                                                                                                                                                                                                                                                                                                                                                                                                      |
|  <p><math>(\text{NH}_3^+)\text{N}-\text{H} \cdots \text{O}=\text{C}(\text{COO}^- \text{PRO})</math><br/> <math>(\text{Ccycl PRO})\text{C}-\text{H} \cdots \text{O}=\text{C}(\text{COO}^- \text{PRO})</math></p>                                                                                   | <p><u>GERXAE (II)</u>: <math>\text{C}^1_2(12), \text{C}^2_2(14), \text{R}^2_2(14)</math><br/> <u>GERXEI (II)</u>: <math>\text{R}^2_2(14)</math><br/> <u>GERWUX01 (II)</u>: <math>\text{C}^2_2(14), \text{R}^2_2(14)</math></p>                                                                                                                                                                                                                                                                                                                                                                                                                       |
| <p><math>(\text{NH}_3^+)\text{N}-\text{H} \cdots \text{O}=\text{C}(\text{COO}^- \text{PRO})</math><br/> <math>(-\text{C})\text{C}-\text{H} \cdots \text{O}=\text{C}(\text{COO}^- \text{PRO})</math></p>                                                                                                                                                                           | <p><u>GERWUX01 (II)</u>: <math>\text{C}^1_2(6), \text{C}^2_2(8)</math></p>                                                                                                                                                                                                                                                                                                                                                                                                                                                                                                                                                                           |
| <p><math>(\text{NH}_3^+)\text{N}-\text{H} \cdots \text{O}=\text{C}(\text{COO}^- \text{PRO})</math><br/> <math>(\text{Ccycl})\text{C}-\text{H} \cdots \text{O}=\text{C}(\text{COO}^- \text{PRO})</math></p>                                                                                                                                                                        | <p><u>GERXEI (II)</u>: <math>\text{C}^2_2(19)</math></p>                                                                                                                                                                                                                                                                                                                                                                                                                                                                                                                                                                                             |
|  <p><math>(\text{NH}_2^+)\text{N}-\text{H} \cdots \text{O}=\text{C}(\text{COOHPRO})</math></p>                                                                                                                                                                                                    | <p><u>RUWBAM (I)</u>: <math>\text{C}(8), \text{C}^2_2(13), \text{C}^2_2(15), \text{C}^2_2(19), \text{R}^1_2(7), \text{R}^2_2(11), \text{R}^2_2(13), \text{D}^3_3(13), \text{D}^3_3(15), \text{D}^3_3(16)</math></p>                                                                                                                                                                                                                                                                                                                                                                                                                                  |
|  <p><math>(-\text{N})\text{N}-\text{H} \cdots \text{O}=\text{C}(\text{COOHPRO})</math></p>                                                                                                                                                                                                       | <p><u>IQISAE (I)</u>: <math>\text{C}(8), \text{C}^2_2(13), \text{C}^2_2(14), \text{C}^2_2(16), \text{C}^2_2(18), \text{C}^2_2(19)</math></p>                                                                                                                                                                                                                                                                                                                                                                                                                                                                                                         |
|  <p><math>(\text{Ccycl PRO})\text{C}-\text{H} \cdots \text{O}=\text{C}(\text{COOHPRO})</math><br/> <math>(\text{Ccycl})\text{C}-\text{H} \cdots \text{O}=\text{C}(\text{COOHPRO})</math></p>                                                                                                    | <p><u>BECWIR (I)</u>: <math>\text{C}(4), \text{C}(6), \text{C}^2_2(10), \text{C}^2_2(14), \text{C}^2_2(15), \text{C}^2_2(16), \text{C}^2_2(17), \text{D}^3_3(9), \text{D}^3_3(13), \text{D}^3_3(17), \text{D}^3_3(18)</math><br/> <u>FEFKEI (I)</u>: <math>\text{C}(4), \text{C}^2_2(10), \text{C}^2_2(12), \text{C}^2_2(13), \text{C}^2_2(15), \text{C}^2_2(17), \text{R}^2_2(10), \text{R}^2_2(12), \text{D}^3_3(13), \text{D}^3_3(17)</math><br/> <u>MCPRL01 (I)</u>: <math>\text{C}(6)</math><br/> <u>YOZTIS (I)</u>: <math>\text{C}^2_2(9), \text{C}^2_2(13), \text{C}^2_2(14), \text{C}^2_2(18), \text{R}^2_2(12), \text{R}^2_2(18)</math></p> |
| <p><math>(-\text{C})\text{C}-\text{H} \cdots \text{O}=\text{C}(\text{COOHPRO})</math></p>                                                                                                                                                                                                                                                                                         | <p><u>BECWIR (I)</u>: <math>\text{C}^2_2(15), \text{C}^2_2(20), \text{R}^2_2(14), \text{R}^2_2(20), \text{D}(2), \text{D}^2_2(10), \text{D}^2_2(12), \text{D}^2_2(14), \text{D}^2_2(7), \text{D}^2_2(9), \text{D}^3_3(16), \text{D}^3_3(17)</math></p>                                                                                                                                                                                                                                                                                                                                                                                               |
|  <p><math>(-\text{S})\text{S}-\text{H} \cdots \text{O}=\text{C}(\text{COOHPRO})</math></p>                                                                                                                                                                                                      | <p><u>IQISAE (I)</u>: <math>\text{C}(8), \text{C}^2_2(15), \text{C}^2_2(16), \text{C}^2_2(18), \text{C}^2_2(19)</math><br/> <u>YOZTIS (I)</u>: <math>\text{C}^2_2(8), \text{C}^2_2(10), \text{C}^2_2(14), \text{C}^2_2(15), \text{C}^2_2(16), \text{C}^2_2(18), \text{C}^2_2(20)</math><br/> <u>QOQWAU</u>: <math>\text{S}(10)</math></p>                                                                                                                                                                                                                                                                                                            |
|  <p><math>(-\text{S})\text{S}-\text{H} \cdots \text{O}=\text{C}(\text{COOHPRO})</math></p>                                                                                                                                                                                                      | <p><u>MCPRL01 (I)</u>: <math>\text{C}(9), \text{C}^2_2(6), \text{C}^2_2(10), \text{C}^2_2(15), \text{C}^2_2(16), \text{C}^2_2(17)</math></p>                                                                                                                                                                                                                                                                                                                                                                                                                                                                                                         |
|  <p><math>(-\text{N})\text{N}-\text{H} \cdots \text{O}=\text{C}(\text{COOHPRO})</math><br/> <math>(-\text{C})\text{C}-\text{H} \cdots \text{O}=\text{C}(\text{COOHPRO})</math></p>                                                                                                              | <p><u>IQISAE (I)</u>: <math>\text{R}^1_2(6)</math></p>                                                                                                                                                                                                                                                                                                                                                                                                                                                                                                                                                                                               |
|  <p><math>[(\text{Ccycl PRO})\text{C}-\text{H}]_2 \cdots \text{O}=\text{C}(\text{COOHPRO})</math><br/> <math>(\text{Ccycl PRO})\text{C}-\text{H} \cdots \text{O}=\text{C}(\text{COOHPRO})</math><br/> <math>(\text{Ccycl})\text{C}-\text{H} \cdots \text{O}=\text{C}(\text{COOHPRO})</math></p> | <p><u>BECWIR (I)</u>: <math>\text{R}^1_2(6)</math><br/> <u>MCPRL01 (I)</u>: <math>\text{C}^1_2(4), \text{R}^2_3(10)</math></p>                                                                                                                                                                                                                                                                                                                                                                                                                                                                                                                       |
| <p><math>[(\text{C})\text{C}-\text{H}]_2 \cdots \text{O}=\text{C}(\text{COOHPRO})</math></p>                                                                                                                                                                                                                                                                                      | <p><u>BECWIR (I)</u>: <math>\text{D}^2_2(7), \text{D}^2_2(9)</math></p>                                                                                                                                                                                                                                                                                                                                                                                                                                                                                                                                                                              |
|                                                                                                                                                                                                                                                                                                                                                                                   | <p><u>YOZTIS (I)</u>: <math>\text{C}^1_2(8), \text{R}^1_2(6)</math></p>                                                                                                                                                                                                                                                                                                                                                                                                                                                                                                                                                                              |

|                                                                                                                                     |                                                                                                                                                                                                                                                                                                                                                                                                                                                                                                                                                                                                                                                                                                                                                                                                                                                                                                                                                                                                                |
|-------------------------------------------------------------------------------------------------------------------------------------|----------------------------------------------------------------------------------------------------------------------------------------------------------------------------------------------------------------------------------------------------------------------------------------------------------------------------------------------------------------------------------------------------------------------------------------------------------------------------------------------------------------------------------------------------------------------------------------------------------------------------------------------------------------------------------------------------------------------------------------------------------------------------------------------------------------------------------------------------------------------------------------------------------------------------------------------------------------------------------------------------------------|
| 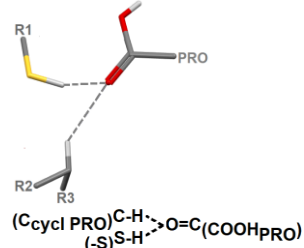 <p>(Ccycl PRO)C-H...O=C(COOHPRO)<br/>(-S)S-H</p>   | MCPRL01 (I): C <sup>1</sup> <sub>2</sub> (9), R <sup>1</sup> <sub>2</sub> (9), R <sup>2</sup> <sub>3</sub> (15)                                                                                                                                                                                                                                                                                                                                                                                                                                                                                                                                                                                                                                                                                                                                                                                                                                                                                                |
|  <p>(-N)N...H=O(COOHPRO)</p>                        | QOQWAW (I): C(8), C <sup>2</sup> <sub>2</sub> (11), C <sup>2</sup> <sub>2</sub> (16), C <sup>2</sup> <sub>2</sub> (18)                                                                                                                                                                                                                                                                                                                                                                                                                                                                                                                                                                                                                                                                                                                                                                                                                                                                                         |
|  <p>(COO-)C=O...H=O(COOHPRO)</p>                    | BECWIR (I): C(11), C <sup>2</sup> <sub>2</sub> (15), C <sup>2</sup> <sub>2</sub> (17), D <sup>3</sup> <sub>3</sub> (14), D <sup>3</sup> <sub>3</sub> (16), D <sup>3</sup> <sub>3</sub> (18), D <sup>3</sup> <sub>3</sub> (20)<br>FEFKEI (I): C(11), C <sup>2</sup> <sub>2</sub> (12), C <sup>2</sup> <sub>2</sub> (13), C <sup>2</sup> <sub>2</sub> (15), C <sup>2</sup> <sub>2</sub> (16), C <sup>2</sup> <sub>2</sub> (17), C <sup>2</sup> <sub>2</sub> (18), C <sup>2</sup> <sub>2</sub> (20), R <sup>2</sup> <sub>2</sub> (19), D <sup>3</sup> <sub>3</sub> (14), D <sup>3</sup> <sub>3</sub> (16), D <sup>3</sup> <sub>3</sub> (18)<br>CIYNIH (I): C <sup>1</sup> <sub>2</sub> (16), C <sup>1</sup> <sub>2</sub> (11), C <sup>2</sup> <sub>2</sub> (12), C <sup>2</sup> <sub>2</sub> (15), C <sup>2</sup> <sub>2</sub> (16), C <sup>2</sup> <sub>2</sub> (17), C <sup>2</sup> <sub>2</sub> (20), D <sup>3</sup> <sub>3</sub> (16), D <sup>3</sup> <sub>3</sub> (18), D <sup>3</sup> <sub>3</sub> (20)     |
|  <p>(C=O)O...H=O(COOHPRO)</p>                       | CIYNIH (I): C(11)<br>MCPRL01 (I): C <sup>2</sup> <sub>2</sub> (9), C <sup>2</sup> <sub>2</sub> (10), C <sup>2</sup> <sub>2</sub> (13), C <sup>2</sup> <sub>2</sub> (14), C <sup>2</sup> <sub>2</sub> (15), C <sup>2</sup> <sub>2</sub> (16)<br>YOZTIS (I): C(7), C <sup>1</sup> <sub>2</sub> (8), C <sup>1</sup> <sub>2</sub> (15), C <sup>2</sup> <sub>2</sub> (9), C <sup>2</sup> <sub>2</sub> (11), C <sup>2</sup> <sub>2</sub> (13), C <sup>2</sup> <sub>2</sub> (15), C <sup>2</sup> <sub>2</sub> (17), C <sup>2</sup> <sub>2</sub> (19)                                                                                                                                                                                                                                                                                                                                                                                                                                                                  |
|  <p>Cl<sup>-</sup>...H=O(COOHPRO)</p>              | RUWBAM (I): C <sup>1</sup> <sub>2</sub> (8), C <sup>1</sup> <sub>2</sub> (9), C <sup>1</sup> <sub>2</sub> (10), D(2), D <sup>1</sup> <sub>2</sub> (3), D <sup>2</sup> <sub>2</sub> (8), D <sup>2</sup> <sub>2</sub> (9), D <sup>2</sup> <sub>2</sub> (10), D <sup>3</sup> <sub>3</sub> (15), D <sup>3</sup> <sub>3</sub> (18)                                                                                                                                                                                                                                                                                                                                                                                                                                                                                                                                                                                                                                                                                  |
|  <p>(Ccycl)C-H...O(OHCOOHPRO)</p>                 | FEFKEI (I): C(8), C <sup>2</sup> <sub>2</sub> (11), C <sup>2</sup> <sub>2</sub> (12), C <sup>2</sup> <sub>2</sub> (13), C <sup>2</sup> <sub>2</sub> (14), C <sup>2</sup> <sub>2</sub> (19), R <sup>2</sup> <sub>2</sub> (12), R <sup>2</sup> <sub>2</sub> (13), R <sup>2</sup> <sub>2</sub> (17), R <sup>2</sup> <sub>2</sub> (19), D <sup>3</sup> <sub>3</sub> (15), D <sup>3</sup> <sub>3</sub> (19)<br>BECWIR (I): C <sup>2</sup> <sub>2</sub> (15), C <sup>2</sup> <sub>2</sub> (19), D(2), D <sup>2</sup> <sub>2</sub> (10), D <sup>2</sup> <sub>2</sub> (11), D <sup>2</sup> <sub>2</sub> (12), D <sup>2</sup> <sub>2</sub> (13), D <sup>3</sup> <sub>3</sub> (9), D <sup>3</sup> <sub>3</sub> (13), D <sup>3</sup> <sub>3</sub> (14), D <sup>3</sup> <sub>3</sub> (15)<br>CIYNIH (I): C(14), C <sup>2</sup> <sub>2</sub> (11), C <sup>2</sup> <sub>2</sub> (12), C <sup>2</sup> <sub>2</sub> (15), C <sup>2</sup> <sub>2</sub> (17), C <sup>2</sup> <sub>2</sub> (19), D <sup>3</sup> <sub>3</sub> (19) |
|  <p>(-C)C-H...O(OHCOOHPRO)</p>                    | TUHMUE: C(14), C(15)<br>BECWIR (I): C(10), C <sup>2</sup> <sub>2</sub> (14), C <sup>2</sup> <sub>2</sub> (16), D <sup>3</sup> <sub>3</sub> (15), D <sup>3</sup> <sub>3</sub> (17)<br>FEFKEI (I): C(9), C <sup>2</sup> <sub>2</sub> (12), C <sup>2</sup> <sub>2</sub> (13), C <sup>2</sup> <sub>2</sub> (14), C <sup>2</sup> <sub>2</sub> (15), C <sup>2</sup> <sub>2</sub> (16), C <sup>2</sup> <sub>2</sub> (20), R <sup>2</sup> <sub>2</sub> (11), R <sup>2</sup> <sub>2</sub> (17), D <sup>3</sup> <sub>3</sub> (14), D <sup>3</sup> <sub>3</sub> (16)<br>IQISAE (I): S(10)<br>YOZTIS (I): C(8)<br>MCPRL01(I): C(8), C <sup>2</sup> <sub>2</sub> (7), C <sup>2</sup> <sub>2</sub> (14), C <sup>2</sup> <sub>2</sub> (15), C <sup>2</sup> <sub>2</sub> (17)<br>QOQWAW (I): C(8), C <sup>2</sup> <sub>2</sub> (13), C <sup>2</sup> <sub>2</sub> (16), C <sup>2</sup> <sub>2</sub> (18)                                                                                                                        |
|  <p>(-N)N...H-O(OHCOOHPRO)<br/>(-C)C-H</p>        | QOQWAW (I): R <sup>2</sup> <sub>2</sub> (6)                                                                                                                                                                                                                                                                                                                                                                                                                                                                                                                                                                                                                                                                                                                                                                                                                                                                                                                                                                    |
|  <p>(COO-)C=O...H-O(OHCOOHPRO)<br/>(Ccycl)C-H</p> | BECWIR (I): D <sup>3</sup> <sub>3</sub> (14)                                                                                                                                                                                                                                                                                                                                                                                                                                                                                                                                                                                                                                                                                                                                                                                                                                                                                                                                                                   |
|  <p>(COO-)C=O...H-O(OHCOOHPRO)<br/>(-C)C-H</p>    | BECWIR (I): R <sup>2</sup> <sub>2</sub> (7)<br>FEFKEI (I): R <sup>2</sup> <sub>2</sub> (6)                                                                                                                                                                                                                                                                                                                                                                                                                                                                                                                                                                                                                                                                                                                                                                                                                                                                                                                     |
|  <p>(C=O)O...H-O(OHCOOHPRO)<br/>(-C)C-H</p>       | MCPRL01 (I): R <sup>2</sup> <sub>2</sub> (7)                                                                                                                                                                                                                                                                                                                                                                                                                                                                                                                                                                                                                                                                                                                                                                                                                                                                                                                                                                   |
|                                                   | BECWIR (I): R <sup>2</sup> <sub>2</sub> (13), R <sup>2</sup> <sub>2</sub> (14), D <sup>3</sup> <sub>3</sub> (14)<br>FEFKEI (I): R <sup>2</sup> <sub>2</sub> (13)                                                                                                                                                                                                                                                                                                                                                                                                                                                                                                                                                                                                                                                                                                                                                                                                                                               |

|                                                                                                                                                                                                                                                  |                                                                                                                                                                                                                                                                                                                                                                                                                                                                                                                                                                                                                                                                                                                                                                                                                                                                                                                                                                                                                                                               |
|--------------------------------------------------------------------------------------------------------------------------------------------------------------------------------------------------------------------------------------------------|---------------------------------------------------------------------------------------------------------------------------------------------------------------------------------------------------------------------------------------------------------------------------------------------------------------------------------------------------------------------------------------------------------------------------------------------------------------------------------------------------------------------------------------------------------------------------------------------------------------------------------------------------------------------------------------------------------------------------------------------------------------------------------------------------------------------------------------------------------------------------------------------------------------------------------------------------------------------------------------------------------------------------------------------------------------|
| $(\text{COO}^-)\text{O}\cdots\text{H}-\text{O}(\text{OHCOOHPR})$<br>$(\text{C}_{\text{cycl}}\text{PRO})\text{C}-\text{H}\cdots\text{O}(\text{C}=\text{O}\text{COOHPR})$                                                                          |                                                                                                                                                                                                                                                                                                                                                                                                                                                                                                                                                                                                                                                                                                                                                                                                                                                                                                                                                                                                                                                               |
| $(\text{COO}^-)\text{O}\cdots\text{H}-\text{O}(\text{OHCOOHPR})$<br>$(\text{C}_{\text{cycl}})\text{C}-\text{H}\cdots\text{O}(\text{C}=\text{O}\text{COOHPR})$                                                                                    | <u>BECWIR (I)</u> : $\text{D}^3_3(16)$                                                                                                                                                                                                                                                                                                                                                                                                                                                                                                                                                                                                                                                                                                                                                                                                                                                                                                                                                                                                                        |
| 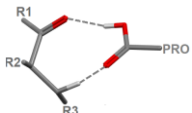<br>$(\text{C}=\text{O})\text{O}\cdots\text{H}-\text{O}(\text{OHCOOHPR})$<br>$(-\text{C})\text{C}-\text{H}\cdots\text{O}(\text{C}=\text{O}\text{COOHPR})$        | <u>YOZTIS (I)</u> : $\text{R}^2_2(9)$                                                                                                                                                                                                                                                                                                                                                                                                                                                                                                                                                                                                                                                                                                                                                                                                                                                                                                                                                                                                                         |
| <br>$\text{Cl}^- \cdots \text{H}-\text{O}(\text{OHCOOHPR})$<br>$(\text{NH}_2^+)\text{N}-\text{H}\cdots\text{O}(\text{C}=\text{O}\text{COOHPR})$                  | <u>RUWBAM (I)</u> : $\text{D}^3_3(15)$                                                                                                                                                                                                                                                                                                                                                                                                                                                                                                                                                                                                                                                                                                                                                                                                                                                                                                                                                                                                                        |
| <br>$(\text{C}_{\text{cycl}}\text{PRO})\text{C}-\text{H}\cdots\text{O}=\text{C}(\text{COOHPR})$<br>$(-\text{C})\text{C}-\text{H}\cdots\text{O}(\text{OHCOOHPR})$ | <u>BECWIR (I)</u> : $\text{R}^2_2(12), \text{R}^2_2(13)$<br><u>FEFKEI (I)</u> : $\text{R}^2_2(11)$<br><u>MCPRL01 (I)</u> : $\text{C}^2_2(10)$                                                                                                                                                                                                                                                                                                                                                                                                                                                                                                                                                                                                                                                                                                                                                                                                                                                                                                                 |
| $(\text{C}_{\text{cycl}}\text{PRO})\text{C}-\text{H}\cdots\text{O}=\text{C}(\text{COOHPR})$<br>$(-\text{C})\text{C}-\text{H}\cdots\text{O}(\text{OHCOOHPR})$                                                                                     | <u>FEFKEI (I)</u> : $\text{C}^2_2(10)$                                                                                                                                                                                                                                                                                                                                                                                                                                                                                                                                                                                                                                                                                                                                                                                                                                                                                                                                                                                                                        |
| $(\text{C}_{\text{cycl}}\text{PRO})\text{C}-\text{H}\cdots\text{O}=\text{C}(\text{COOHPR})$<br>$(\text{C}_{\text{cycl}})\text{C}-\text{H}\cdots\text{O}(\text{OHCOOHPR})$                                                                        | <u>BECWIR (I)</u> : $\text{D}^3_3(11)$                                                                                                                                                                                                                                                                                                                                                                                                                                                                                                                                                                                                                                                                                                                                                                                                                                                                                                                                                                                                                        |
| <br>$(-\text{C})\text{C}-\text{H}\cdots\text{O}=\text{C}(\text{COOHPR})$<br>$(\text{C}_{\text{cycl}})\text{C}-\text{H}\cdots\text{O}(\text{OHCOOHPR})$         | <u>BECWIR (I)</u> : $\text{D}^3_3(11)$<br><u>FEFKEI (I)</u> : $\text{C}^1_2(11)$                                                                                                                                                                                                                                                                                                                                                                                                                                                                                                                                                                                                                                                                                                                                                                                                                                                                                                                                                                              |
| <br>$(-\text{S})\text{S}-\text{H}\cdots\text{O}=\text{C}(\text{COOHPR})$<br>$(-\text{C})\text{C}-\text{H}\cdots\text{O}(\text{OHCOOHPR})$                      | <u>MCPRL01 (I)</u> : $\text{C}^2_2(7)$                                                                                                                                                                                                                                                                                                                                                                                                                                                                                                                                                                                                                                                                                                                                                                                                                                                                                                                                                                                                                        |
| <br>$(\text{COO}^-)\text{C}=\text{O}\cdots\text{H}-\text{C}(\text{C}_{\text{cycl}}\text{PRO})$                                                                 | <u>DIVHOF01 (II)</u> : $\text{C}^2_2(11), \text{C}^2_2(12), \text{C}^2_2(14), \text{C}^2_2(15), \text{R}^2_2(14), \text{R}^2_2(17), \text{D}(2), \text{D}^2_3(8), \text{D}^3_3(11), \text{D}^3_3(12)$                                                                                                                                                                                                                                                                                                                                                                                                                                                                                                                                                                                                                                                                                                                                                                                                                                                         |
| <br>$(\text{C}=\text{O})\text{O}\cdots\text{H}-\text{C}(\text{C}_{\text{cycl}}\text{PRO})$                                                                     | <u>TUHMUE</u> : $\text{S}(9)$<br><u>DIVHOF01 (II)</u> : $\text{C}(5), \text{C}(6), \text{C}^2_2(11), \text{C}^2_2(13), \text{C}^2_2(14), \text{C}^2_2(16), \text{C}^2_2(17), \text{R}^1_2(5), \text{R}^2_2(16), \text{R}^2_2(17), \text{R}^3_3(19), \text{D}^3_3(14), \text{D}^3_3(15), \text{D}^3_3(16), \text{D}^3_3(17), \text{D}^3_3(18), \text{D}^3_3(19), \text{D}^3_3(20)$<br><u>MCPRL01 (I)</u> : $\text{C}^2_2(9), \text{C}^2_2(11), \text{C}^2_2(12), \text{C}^2_2(13), \text{C}^2_2(14), \text{C}^2_2(15), \text{R}^2_3(10), \text{R}^2_3(15), \text{R}^3_4(16)$<br><u>YOZTIS (I)</u> : $\text{C}(6), \text{C}^1_2(8), \text{C}^2_2(9), \text{C}^2_2(10), \text{C}^2_2(13), \text{C}^2_2(14), \text{C}^2_2(18), \text{C}^2_2(20), \text{R}^2_2(14), \text{R}^2_2(20)$<br><u>FEFKEI (I)</u> : $\text{C}(6), \text{C}^1_2(6), \text{C}^2_2(10), \text{C}^2_2(12), \text{C}^2_2(15), \text{C}^2_2(17), \text{C}^3_4(19), \text{R}^2_2(10), \text{R}^2_2(11), \text{R}^2_2(13), \text{R}^3_4(19), \text{D}^2_3(9), \text{D}^3_3(15), \text{D}^3_3(19)$ |
| <br>$(\text{H}_2\text{O})\text{O}\cdots\text{H}-\text{C}(\text{C}_{\text{cycl}}\text{PRO})$                                                                    | <u>GERXAE (II)</u> : $\text{C}^1_2(11), \text{C}^2_2(11), \text{R}^2_2(8), \text{D}(2), \text{D}^3_3(11), \text{D}^3_3(15), \text{D}^3_3(17), \text{D}^3_3(18), \text{D}^3_3(19), \text{D}^3_3(20)$<br><u>GERWUX01 (II)</u> : $\text{C}^2_2(11), \text{D}(2), \text{D}^2_2(10), \text{D}^2_2(11), \text{D}^3_3(11), \text{D}^3_3(17), \text{D}^3_3(19)$                                                                                                                                                                                                                                                                                                                                                                                                                                                                                                                                                                                                                                                                                                       |



|                                                                                                                                              |                                                                                                                                                                                                                                                                                                                                                                                                                                                                                                                                                                                                                                          |
|----------------------------------------------------------------------------------------------------------------------------------------------|------------------------------------------------------------------------------------------------------------------------------------------------------------------------------------------------------------------------------------------------------------------------------------------------------------------------------------------------------------------------------------------------------------------------------------------------------------------------------------------------------------------------------------------------------------------------------------------------------------------------------------------|
| 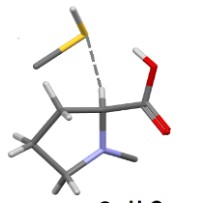 <p><b>(-S/Scycl)S...H-C(CcyclPRO)</b></p>                   | <p><b>NELSEC (III):</b> C(4), C<sub>2</sub>(7), C<sub>2</sub>(8), C<sub>2</sub>(9), C<sub>2</sub>(10), C<sub>4</sub>(17), R<sub>4</sub>(17)<br/> <b>MCPRL01 (I):</b> C(7), C<sub>2</sub>(6), C<sub>2</sub>(7), C<sub>2</sub>(10), C<sub>2</sub>(11), C<sub>2</sub>(13), C<sub>2</sub>(14), C<sub>2</sub>(15), C<sub>2</sub>(16), R<sub>2</sub>(20)<br/> <b>YOZTIS (I):</b> C(8), C<sub>1</sub>(16), C<sub>2</sub>(8), C<sub>2</sub>(9), C<sub>2</sub>(10), C<sub>2</sub>(11), C<sub>2</sub>(12), C<sub>2</sub>(14), C<sub>2</sub>(15), C<sub>2</sub>(16), C<sub>2</sub>(18), C<sub>2</sub>(20), R<sub>2</sub>(10), R<sub>2</sub>(12)</p> |
|  <p><b>Cl<sup>-</sup>...H-C(CcyclPRO)</b></p>                | <p><b>RUWBAM (I):</b> C<sub>1</sub>(8), D<sub>1</sub>(3), D<sub>2</sub>(7), D<sub>2</sub>(8), D<sub>3</sub>(14), D<sub>3</sub>(18)</p>                                                                                                                                                                                                                                                                                                                                                                                                                                                                                                   |
|  <p><b>(COOH)O...H-C(CcyclPRO)</b></p>                       | <p><b>GERXEI (II):</b> C(9), C<sub>1</sub>(11), C<sub>2</sub>(10), C<sub>2</sub>(12), C<sub>2</sub>(13), C<sub>2</sub>(14), C<sub>2</sub>(15), C<sub>2</sub>(16), C<sub>2</sub>(17), C<sub>2</sub>(18), R<sub>2</sub>(11), R<sub>3</sub>(19)</p>                                                                                                                                                                                                                                                                                                                                                                                         |
|  <p><b>(COOH)C=O...H-C(CcyclPRO)</b><br/> <b>(COOH)O</b></p> | <p><b>GERXEI (II):</b> R<sub>2</sub>(4)</p>                                                                                                                                                                                                                                                                                                                                                                                                                                                                                                                                                                                              |

**Table S16.** Supramolecular synthon patterns involving COOH/COO- groups of proline ring, in relations to three types of proline-based tectons, observed in the ACEI crystal structures.

| Tecton I            |                                                         | Tecton II                                             | Tecton III       |
|---------------------|---------------------------------------------------------|-------------------------------------------------------|------------------|
| C(4)                | BECWIR, FEFKEI                                          |                                                       | PROLIN03         |
| C(5)                |                                                         | FIFGEG,                                               | NELSEC, PROLIN03 |
| C(6)                | BECWIR, MCPRL01, YOZTIS                                 | GERWUX01, GERXAE, GERXEI,                             | NELSEC           |
| C(7)                | MCPRL01, YOZTIS                                         |                                                       |                  |
| C(8)                | FEFKEI, MCPRL01, YOZTIS, IQISAE, QOQWAW, RUWBAM         | DIVHOF01                                              |                  |
| C(9)                | BECWIR, FEFKEI, MCPRL01                                 | FIFGEG                                                |                  |
| C(11)               | BECWIR, CIYNIH                                          |                                                       |                  |
| C(12)               |                                                         | GERWUX01, GERXAE, GERXEI,                             |                  |
| C(14)               | CIYNIH                                                  |                                                       |                  |
| C(15)               |                                                         | GERXEI, EDALEC                                        |                  |
| C <sub>1</sub> (4)  | MCPRL01                                                 | UZOV AH, UZOV AH03, GERWUX01, GERXAE, GERXEI          | PROLIN03         |
| C <sub>1</sub> (5)  |                                                         |                                                       | NELSEC, PROLIN03 |
| C <sub>1</sub> (6)  |                                                         | UZOV AH                                               |                  |
| C <sub>2</sub> (8)  | YOZTIS, RUWBAM                                          |                                                       |                  |
| C <sub>2</sub> (9)  | RUWBAM                                                  |                                                       |                  |
| C <sub>2</sub> (10) | RUWBAM                                                  |                                                       |                  |
| C <sub>2</sub> (11) | BECWIR, FEFKEI                                          | GERXAE?                                               |                  |
| C <sub>2</sub> (12) |                                                         | GERWUX01, GERXAE, GERXEI                              |                  |
| C <sub>2</sub> (15) | YOZTIS                                                  | GERXEI                                                |                  |
| C <sub>2</sub> (16) | CIYNIH                                                  |                                                       |                  |
| C <sub>2</sub> (17) |                                                         | GERXEI                                                |                  |
| C <sub>2</sub> (6)  | MCPRL01                                                 | IVEGIA, UZOV AH, UZOV AH03, GERWUX01, GERXAE, GERXEI, | NELSEC, PROLIN03 |
| C <sub>2</sub> (7)  | MCPRL01                                                 | IVEGIA, FIFGEG                                        | NELSEC           |
| C <sub>2</sub> (8)  | YOZTIS                                                  | IVEGIA, UZOV AH                                       | NELSEC           |
| C <sub>2</sub> (9)  | MCPRL01, YOZTIS                                         | EDALEC                                                | NELSEC, PROLIN03 |
| C <sub>2</sub> (10) | BECWIR, FEFKEI, MCPRL01, YOZTIS                         | GERWUX01, GERXAE,                                     | NELSEC, PROLIN03 |
| C <sub>2</sub> (11) | BECWIR, FEFKEI, CIYNIH, MCPRL01, YOZTIS, QOQWAW         | DIVHOF01,                                             | NELSEC           |
| C <sub>2</sub> (12) | BECWIR, FEFKEI, CIYNIH, MCPRL01, YOZTIS                 | GERWUX01, GERXAE, GERXEI,                             |                  |
| C <sub>2</sub> (13) | BECWIR, FEFKEI, MCPRL01, YOZTIS, IQISAE, QOQWAW, RUWBAM | DIVHOF01, GERXEI,                                     |                  |
| C <sub>2</sub> (14) | BECWIR, FEFKEI, IQISAE, MCPRL01, YOZTIS                 | DIVHOF01, GERWUX01, GERXAE, GERXEI, FIFGEG            |                  |
| C <sub>2</sub> (15) | BECWIR, FEFKEI, CIYNIH, IQISAE, YOZTIS, MCPRL01, RUWBAM | DIVHOF01, GERXAE, GERXEI,                             |                  |
| C <sub>2</sub> (16) | BECWIR, FEFKEI, CIYNIH, IQISAE, YOZTIS, MCPRL01, QOQWAW | GERWUX01, GERXAE, GERXEI,                             |                  |
| C <sub>2</sub> (17) | BECWIR, FEFKEI, CIYNIH, MCPRL01, YOZTIS                 | GERWUX01, GERXAE, GERXEI, FIFGEG                      |                  |
| C <sub>2</sub> (18) | BECWIR, FEFKEI, YOZTIS, IQISAE, QOQWAW                  | GERWUX01, GERXAE, GERXEI                              |                  |
| C <sub>2</sub> (19) | BECWIR, FEFKEI, CIYNIH, YOZTIS, IQISAE, RUWBAM          | GERWUX01, GERXAE, GERXEI,                             |                  |
| C <sub>2</sub> (20) | BECWIR, FEFKEI, CIYNIH, YOZTIS,                         | GERWUX01, GERXAE, GERXEI                              |                  |
| C <sub>4</sub> (14) |                                                         |                                                       | PROLIN03         |
| C <sub>4</sub> (16) |                                                         |                                                       | NELSEC           |
| C <sub>4</sub> (16) |                                                         |                                                       | PROLIN03         |
| C <sub>4</sub> (17) |                                                         |                                                       | NELSEC           |

|                                  |                                |                                    |
|----------------------------------|--------------------------------|------------------------------------|
| C <sub>4</sub> <sup>1</sup> (18) |                                | NELSEC                             |
| R <sub>2</sub> <sup>1</sup> (5)  |                                | PROLIN03                           |
| R <sub>2</sub> <sup>1</sup> (6)  | BECWIR, IQISAE, YOZTIS         | UZOVAH                             |
| R <sub>2</sub> <sup>1</sup> (9)  | MCPRL01                        |                                    |
| R <sub>2</sub> <sup>1</sup> (10) |                                | FIFGEG                             |
| R <sub>2</sub> <sup>1</sup> (4)  |                                | PROLIN03                           |
| R <sub>2</sub> <sup>2</sup> (6)  | FEFKEI, QOQWAU                 |                                    |
| R <sub>2</sub> <sup>2</sup> (7)  | BECWIR, MCPRL01                | PROLIN03                           |
| R <sub>2</sub> <sup>2</sup> (8)  |                                | UZOVAH                             |
| R <sub>2</sub> <sup>2</sup> (9)  | YOZTIS                         |                                    |
| R <sub>2</sub> <sup>2</sup> (10) | FEFKEI, YOZTIS                 | GERWUX01, GERXAE                   |
| R <sub>2</sub> <sup>2</sup> (11) | FEFKEI, RUWBAM                 |                                    |
| R <sub>2</sub> <sup>2</sup> (12) | BECWIR, FEFKEI, YOZTIS         | GERWUX01, GERXAE, GERXEI           |
| R <sub>2</sub> <sup>2</sup> (13) | BECWIR, FEFKEI, RUWBAM         | GERXEI                             |
| R <sub>2</sub> <sup>2</sup> (14) | BECWIR                         | GERWUX01, GERXAE, GERXEI           |
| R <sub>2</sub> <sup>2</sup> (16) |                                | GERWUX01, GERXAE                   |
| R <sub>2</sub> <sup>2</sup> (17) | FEFKEI                         | GERWUX01, GERXAE, GERXEI           |
| R <sub>2</sub> <sup>2</sup> (18) | YOZTIS                         |                                    |
| R <sub>2</sub> <sup>2</sup> (19) | FEFKEI                         | GERWUX01, GERXAE, GERXEI           |
| R <sub>2</sub> <sup>2</sup> (20) | BECWIR, FEFKEI,                | GERXEI                             |
| R <sub>3</sub> <sup>2</sup> (10) | MCPRL01                        |                                    |
| R <sub>3</sub> <sup>2</sup> (15) | MCPRL01                        |                                    |
| R <sub>3</sub> <sup>2</sup> (16) |                                | GERWUX01, GERXEI                   |
| R <sub>3</sub> <sup>2</sup> (19) |                                | DIVHOF01                           |
| R <sub>4</sub> <sup>3</sup> (14) | BECWIR                         | PROLIN03                           |
| R <sub>4</sub> <sup>3</sup> (16) | MCPRL01                        | NELSEC                             |
| R <sub>4</sub> <sup>3</sup> (14) | BECWIR                         | NELSEC                             |
| R <sub>4</sub> <sup>3</sup> (17) |                                | NELSEC                             |
| D(2)                             | BECWIR, RUWBAM                 | IVEGIA, UZOVAH, UZOVAH03           |
| D <sub>2</sub> <sup>1</sup> (3)  | RUWBAM                         | IVEGIA                             |
| D <sub>2</sub> <sup>2</sup> (5)  |                                | IVEGIA                             |
| D <sub>2</sub> <sup>2</sup> (8)  | RUWBAM                         |                                    |
| D <sub>2</sub> <sup>2</sup> (9)  | RUWBAM                         |                                    |
| D <sub>2</sub> <sup>2</sup> (10) | BECWIR, RUWBAM                 |                                    |
| D <sub>2</sub> <sup>2</sup> (12) | BECWIR                         | IVEGIA                             |
| D <sub>2</sub> <sup>2</sup> (14) | BECWIR                         | IVEGIA                             |
| D <sub>3</sub> <sup>2</sup> (7)  | BECWIR                         |                                    |
| D <sub>3</sub> <sup>2</sup> (13) | BECWIR                         |                                    |
| D <sub>3</sub> <sup>2</sup> (14) | FEFKEI, CIYNIH                 |                                    |
| D <sub>3</sub> <sup>3</sup> (9)  | BECWIR                         |                                    |
| D <sub>3</sub> <sup>3</sup> (11) | BECWIR                         | GERWUX01, GERXAE                   |
| D <sub>3</sub> <sup>3</sup> (13) | FEFKEI, RUWBAM                 | DIVHOF01                           |
| D <sub>3</sub> <sup>3</sup> (14) | BECWIR, FEFKEI                 | UZOVAH, FIFGEG                     |
| D <sub>3</sub> <sup>3</sup> (15) | BECWIR, FEFKEI, RUWBAM         | UZOVAH, DIVHOF01, GERWUX01, GERXAE |
| D <sub>3</sub> <sup>3</sup> (16) | BECWIR, FEFKEI, CIYNIH, RUWBAM | UZOVAH, DIVHOF01, FIFGEG           |
| D <sub>3</sub> <sup>3</sup> (17) | BECWIR, FEFKEI,                | UZOVAH, DIVHOF01, GERWUX01, GERXAE |
| D <sub>3</sub> <sup>3</sup> (18) | BECWIR, FEFKEI, CIYNIH, RUWBAM | UZOVAH, DIVHOF01, FIFGEG           |
| D <sub>3</sub> <sup>3</sup> (19) | FEFKEI, CIYNIH                 | DIVHOF01, GERWUX01, GERXAE         |
| D <sub>3</sub> <sup>3</sup> (20) | BECWIR, CIYNIH                 | IVEGIA                             |
| S(10)                            | QOQWAU                         |                                    |

**Table S17.** Supramolecular synthon patterns formed by COOH(COO<sup>-</sup>) of pyrrolidine ring of proline in investigated crystals.

| <i>Tecton 1</i>                  |                                                                                                                                                                                                                                                                                                                            |
|----------------------------------|----------------------------------------------------------------------------------------------------------------------------------------------------------------------------------------------------------------------------------------------------------------------------------------------------------------------------|
| C(4)                             | BECWIR, FEFKEI<br>*(CH)C-H...O <sub>(C=O/COO-)</sub>                                                                                                                                                                                                                                                                       |
| C(6)                             | BECWIR, FEFKEI, YOZTIS, MCPRL01<br>*(CH)C-H...O <sub>(C=O/COO-)</sub>                                                                                                                                                                                                                                                      |
| C(7)                             | MCPRL01, YOZTIS<br>*(OH)O-H...O <sub>(C=O/COO-)</sub>                                                                                                                                                                                                                                                                      |
| C(8)                             | FEFKEI, MCPRL01, QOQWAU<br>(CH)C-H...O <sub>(OH)</sub>                                                                                                                                                                                                                                                                     |
| C(11)                            | BECWIR, CIYNIH<br>*(OH)O-H...O <sub>(C=O/COO-)</sub>                                                                                                                                                                                                                                                                       |
| C <sub>2</sub> <sup>2</sup> (9)  | MCPRL01, YOZTIS<br>*(OH)O-H...O <sub>(C=O/COO-)</sub> & (CH)C-H...O <sub>(C=O/COO-)</sub>                                                                                                                                                                                                                                  |
| C <sub>2</sub> <sup>2</sup> (10) | BECWIR, FEFKEI, MCPRL01<br>*(NH)N-H...O <sub>(C=O/COO-)</sub> & (CH)C-H...O <sub>(C=O/COO-)</sub><br>*(NH)N-H...O <sub>(C=O/COO-)</sub> & (NH)N-H...O <sub>(C=O/COO-)</sub><br>*(CH)C-H...O <sub>(C=O/COO-)</sub> & (CH)C-H...O <sub>(C=O/COO-)</sub><br>*(CH)C-H...O <sub>(C=O)</sub> & (CH)C-H...O <sub>(OH)</sub>       |
| C <sub>2</sub> <sup>2</sup> (12) | FEFKEI, CIYNIH, MCPRL01,<br>*(OH)O-H...O <sub>(C=O/COO-)</sub> & (NH)N-H...O <sub>(C=O/COO-)</sub><br>*(NH)N-H...O <sub>(C=O/COO-)</sub> & (CH)C-H...O <sub>(OH)</sub><br>*(CH)C-H...O <sub>(C=O/COO-)</sub> & (CH)C-H...O <sub>(C=O/COO-)</sub><br>*(NH)N-H...O <sub>(C=O/COO-)</sub> & (CH)C-H...O <sub>(C=O/COO-)</sub> |
| C <sub>2</sub> <sup>2</sup> (13) | MCPRL01, YOZTIS<br>*(OH)O-H...O <sub>(C=O/COO-)</sub> & (CH)C-H...O <sub>(C=O/COO-)</sub>                                                                                                                                                                                                                                  |
| C <sub>2</sub> <sup>2</sup> (14) | BECWIR, FEFKEI, MCPRL01, CIYNIH, IQISAE<br>*(CH)C-H...O <sub>(C=O/COO-)</sub> & (CH)C-H...O <sub>(OH)</sub><br>*(NH)N-H...O <sub>(C=O/COO-)</sub> & (CH)C-H...O <sub>(OH)</sub><br>*(NH)N-H...O <sub>(C=O/COO-)</sub> & (CH)C-H...O <sub>(C=O/COO-)</sub>                                                                  |

|             |                                                                                                                                                                                                                                                                                                                                                                                                                                          |
|-------------|------------------------------------------------------------------------------------------------------------------------------------------------------------------------------------------------------------------------------------------------------------------------------------------------------------------------------------------------------------------------------------------------------------------------------------------|
| $C_2^2(15)$ | BECWIR, FEFKEI, YOZTIS, CIYNIH<br>* <sub>(OH)</sub> O-H <sup>··</sup> O <sub>(C=O,COO-)</sub> & (CH) <sub>3</sub> C-H <sup>··</sup> O <sub>(C=O,COO-)</sub><br>* <sub>(CH)</sub> C-H <sup>··</sup> O <sub>(C=O,COO-)</sub> <sub>2</sub> & (CH) <sub>3</sub> C-H <sup>··</sup> O <sub>(OH)</sub>                                                                                                                                          |
| $C_2^2(16)$ | BECWIR, FEFKEI, CIYNIH<br>* <sub>(OH)</sub> O-H <sup>··</sup> O <sub>(C=O,COO-)</sub> & (NH) <sub>2</sub> N-H <sup>··</sup> O <sub>(C=O,COO-)</sub><br>* <sub>(CH)</sub> C-H <sup>··</sup> O <sub>(C=O,COO-)</sub> & (CH) <sub>3</sub> C-H <sup>··</sup> O <sub>(OH)</sub>                                                                                                                                                               |
| $C_2^2(17)$ | BECWIR, FEFKEI, YOZTIS, CIYNIH<br>* <sub>(OH)</sub> O-H <sup>··</sup> O <sub>(C=O,COO-)</sub> & (CH) <sub>3</sub> C-H <sup>··</sup> O <sub>(C=O,COO-)</sub><br>* <sub>(NH)</sub> N-H <sup>··</sup> O <sub>(C=O,COO-)</sub> & (CH) <sub>3</sub> C-H <sup>··</sup> O <sub>(C=O,COO-)</sub><br>* <sub>(NH)</sub> N-H <sup>··</sup> O <sub>(C=O,COO-)</sub> & (CH) <sub>3</sub> C-H <sup>··</sup> O <sub>(OH)</sub>                          |
| $C_2^2(19)$ | BECWIR, FEFKEI, CIYNIH<br>(NH) <sub>2</sub> N-H <sup>··</sup> O <sub>(C=O,COO-)</sub> & (CH) <sub>3</sub> C-H <sup>··</sup> O <sub>(OH)</sub>                                                                                                                                                                                                                                                                                            |
| $C_2^2(20)$ | FEFKEI, CIYNIH<br>(OH) <sub>2</sub> O-H <sup>··</sup> O <sub>(C=O,COO-)</sub> & (CH) <sub>3</sub> C-H <sup>··</sup> O <sub>(OH)</sub><br>(OH) <sub>2</sub> O-H <sup>··</sup> O <sub>(C=O,COO-)</sub> & (CH) <sub>3</sub> C-H <sup>··</sup> O <sub>(C=O,COO-)</sub>                                                                                                                                                                       |
| $R_2^1(6)$  | BECWIR, YOZTIS<br>* <sub>(CH)</sub> C-H <sup>··</sup> O <sub>(C=O,COO-)</sub> & (CH) <sub>3</sub> C-H <sup>··</sup> O <sub>(C=O,COO-)</sub>                                                                                                                                                                                                                                                                                              |
| $R_2^2(7)$  | BECWIR, MCPRL01<br>* <sub>(OH)</sub> O-H <sup>··</sup> O <sub>(C=O,COO-)</sub> & (CH) <sub>3</sub> C-H <sup>··</sup> O <sub>(OH)</sub>                                                                                                                                                                                                                                                                                                   |
| $R_2^2(12)$ | BECWIR, FEFKEI<br>* <sub>(CH)</sub> C-H <sup>··</sup> O <sub>(C=O,COO-)</sub> & (CH) <sub>3</sub> C-H <sup>··</sup> O <sub>(OH)</sub>                                                                                                                                                                                                                                                                                                    |
| $D(2)$      | BECWIR, CIYNIH<br>* <sub>(CH)</sub> C-H <sup>··</sup> O <sub>(C=O,COOH)</sub><br>* <sub>(CH)</sub> C-H <sup>··</sup> O <sub>(OH)</sub><br>* <sub>(NH)</sub> N-H <sup>··</sup> O <sub>(OH)</sub>                                                                                                                                                                                                                                          |
| $D_3^2(14)$ | FEFKEI, CIYNIH<br>(OH) <sub>2</sub> O-H <sup>··</sup> O <sub>(C=O,COO-)</sub> & ((OH) <sub>2</sub> O-H <sup>··</sup> O <sub>(C=O,COO-)</sub> ) <sub>2</sub>                                                                                                                                                                                                                                                                              |
| $D_3^3(14)$ | BECWIR, FEFKEI, CIYNIH<br>* <sub>(OH)</sub> O-H <sup>··</sup> O <sub>(C=O,COO-)</sub> & ((CH) <sub>3</sub> C-H <sup>··</sup> O <sub>(OH)</sub> ) <sub>2</sub><br>* <sub>(NH)</sub> N-H <sup>··</sup> O <sub>(C=O,COO-)</sub> & ((CH) <sub>3</sub> C-H <sup>··</sup> O <sub>(OH)</sub> ) <sub>2</sub>                                                                                                                                     |
| $D_3^3(16)$ | FEFKEI, CIYNIH<br>* <sub>(OH)</sub> O-H <sup>··</sup> O <sub>(C=O,COO-)</sub> & ((NH) <sub>2</sub> N-H <sup>··</sup> O <sub>(OH)</sub> ) <sub>2</sub><br>* <sub>(OH)</sub> O-H <sup>··</sup> O <sub>(C=O,COO-)</sub> & ((OH) <sub>2</sub> O-H <sup>··</sup> O <sub>(C=O,COO-)</sub> ) <sub>2</sub><br>* <sub>(NH)</sub> N-H <sup>··</sup> O <sub>(OH)</sub> ) <sub>2</sub> & (CH) <sub>3</sub> C-H <sup>··</sup> O <sub>(C=O,COO-)</sub> |
| $D_3^3(18)$ | FEFKEI, CIYNIH<br>(OH) <sub>2</sub> O-H <sup>··</sup> O <sub>(C=O,COO-)</sub> & ((CH) <sub>3</sub> C-H <sup>··</sup> O <sub>(OH)</sub> ) <sub>2</sub>                                                                                                                                                                                                                                                                                    |
| $D_3^3(19)$ | FEFKEI, CIYNIH<br>* <sub>(CH)</sub> C-H <sup>··</sup> O <sub>(OH)</sub> & ((CH) <sub>3</sub> C-H <sup>··</sup> O <sub>(OH)</sub> ) <sub>2</sub>                                                                                                                                                                                                                                                                                          |
| $D_3^3(20)$ | BECWIR, CIYNIH<br>* <sub>(OH)</sub> O-H <sup>··</sup> O <sub>(C=O,COO-)</sub> & ((CH) <sub>3</sub> C-H <sup>··</sup> O <sub>(OH)</sub> ) <sub>2</sub><br>* <sub>(OH)</sub> O-H <sup>··</sup> O <sub>(C=O,COO-)</sub> ) <sub>2</sub> & (CH) <sub>3</sub> C-H <sup>··</sup> O <sub>(C=O,COO-)</sub>                                                                                                                                        |

### Tecton II

|             |                                                                                                                                                                                                                                                                                                      |
|-------------|------------------------------------------------------------------------------------------------------------------------------------------------------------------------------------------------------------------------------------------------------------------------------------------------------|
| $C(5)$      | DIFHOF01, FIFGEG<br>* <sub>(CH)</sub> C-H <sup>··</sup> O <sub>(C=O,COO-)</sub>                                                                                                                                                                                                                      |
| $C(6)$      | DIFHOF01, GERXAE, GERXEI, GERWUX01<br>* <sub>(CH)</sub> C-H <sup>··</sup> O <sub>(C=O,COO-)</sub>                                                                                                                                                                                                    |
| $C(12)$     | GERXAE, GERXEI, GERWUX01<br>* <sub>(NH)</sub> N-H <sup>··</sup> O <sub>(C=O,COO-)</sub>                                                                                                                                                                                                              |
| $C_2^1(4)$  | GERXAE, GERXEI, GERWUX01, UZOVAH03<br>(NH) <sub>2</sub> N-H <sup>··</sup> O <sub>(C=O,COO-)</sub> & (NH) <sub>2</sub> N-H <sup>··</sup> O <sub>(C=O,COO-)</sub>                                                                                                                                      |
| $C_2^1(11)$ | GERXAE, GERXEI<br>(OH) <sub>2</sub> O-H <sup>··</sup> O <sub>(OH)</sub> & (CH) <sub>3</sub> C-H <sup>··</sup> O <sub>(OH)</sub><br>(OH) <sub>2</sub> O-H <sup>··</sup> O <sub>(OH)</sub> & (COO) <sub>2</sub> C-H <sup>··</sup> O <sub>(OH)</sub>                                                    |
| $C_2^1(12)$ | GERXAE, GERXEI, GERWUX01<br>(NH) <sub>2</sub> N-H <sup>··</sup> O <sub>(C=O,COO-)</sub> & (CH) <sub>3</sub> C-H <sup>··</sup> O <sub>(C=O,COO-)</sub>                                                                                                                                                |
| $C_2^2(6)$  | IVEGIA, GERXAE, GERXEI, GERWUX01<br>[(NH) <sub>2</sub> N-H <sup>··</sup> O <sub>(C=O,COO-)</sub> ] <sub>2</sub>                                                                                                                                                                                      |
| $C_2^2(10)$ | GERXEI, GERWUX01<br>* <sub>(NH)</sub> N-H <sup>··</sup> O <sub>(C=O,COO-)</sub> & (CH) <sub>3</sub> C-H <sup>··</sup> O <sub>(C=O,COO-)</sub>                                                                                                                                                        |
| $C_2^2(11)$ | DIFHOF01, GERXEI,<br>* <sub>(NH)</sub> N-H <sup>··</sup> O <sub>(C=O,COO-)</sub> & (CH) <sub>3</sub> C-H <sup>··</sup> O <sub>(C=O,COO-)</sub><br>* <sub>(CH)</sub> C-H <sup>··</sup> O <sub>(C=O,COO-)</sub> & (CH) <sub>3</sub> C-H <sup>··</sup> O <sub>(C=O,COO-)</sub>                          |
| $C_2^2(12)$ | GERXAE, GERXEI, GERWUX01<br>* <sub>(NH)</sub> N-H <sup>··</sup> O <sub>(C=O,COO-)</sub> & (CH) <sub>3</sub> C-H <sup>··</sup> O <sub>(C=O,COO-)</sub>                                                                                                                                                |
| $C_2^2(14)$ | DIFHOF01, GERXAE, GERXEI, GERWUX01, FIFGEG<br>* <sub>(NH)</sub> N-H <sup>··</sup> O <sub>(C=O,COO-)</sub> & (CH) <sub>3</sub> C-H <sup>··</sup> O <sub>(C=O,COO-)</sub><br>* <sub>(CH)</sub> C-H <sup>··</sup> O <sub>(C=O,COO-)</sub> & (CH) <sub>3</sub> C-H <sup>··</sup> O <sub>(C=O,COO-)</sub> |
| $C_2^2(15)$ | DIFHOF01, GERXAE, GERXEI<br>* <sub>(NH)</sub> N-H <sup>··</sup> O <sub>(C=O,COO-)</sub> & (CH) <sub>3</sub> C-H <sup>··</sup> O <sub>(C=O,COO-)</sub><br>* <sub>(CH)</sub> C-H <sup>··</sup> O <sub>(C=O,COO-)</sub> & (CH) <sub>3</sub> C-H <sup>··</sup> O <sub>(C=O,COO-)</sub>                   |
| $C_2^2(16)$ | DIFHOF01, GERXAE, GERXEI, GERWUX01<br>* <sub>(CH)</sub> C-H <sup>··</sup> O <sub>(C=O,COO-)</sub> & (CH) <sub>3</sub> C-H <sup>··</sup> O <sub>(C=O,COO-)</sub>                                                                                                                                      |
| $C_2^2(17)$ | DIFHOF01, GERXAE, GERXEI, GERWUX01, FIFGEG<br>* <sub>(CH)</sub> C-H <sup>··</sup> O <sub>(C=O,COO-)</sub> & (CH) <sub>3</sub> C-H <sup>··</sup> O <sub>(C=O,COO-)</sub><br>* <sub>(NH)</sub> N-H <sup>··</sup> O <sub>(C=O,COO-)</sub> & (CH) <sub>3</sub> C-H <sup>··</sup> O <sub>(C=O,COO-)</sub> |
| $C_2^2(18)$ | GERXAE, GERXEI, GERWUX01<br>* <sub>(NH)</sub> N-H <sup>··</sup> O <sub>(C=O,COO-)</sub> & (CH) <sub>3</sub> C-H <sup>··</sup> O <sub>(C=O,COO-)</sub>                                                                                                                                                |

|             |                                                                                                                                                                                                                                                                        |
|-------------|------------------------------------------------------------------------------------------------------------------------------------------------------------------------------------------------------------------------------------------------------------------------|
| $C_2^2(19)$ | GERXAE, GERXEI, GERWUX01<br>* <sub>(NH)</sub> N-H $\cdots$ O <sub>(C=O/COO-)</sub> & <sub>(NH)</sub> N-H $\cdots$ O <sub>(C=O/COO-)</sub><br>* <sub>(CH)</sub> C-H $\cdots$ O <sub>(C=O/COO-)</sub> & <sub>(CH)</sub> C-H $\cdots$ O <sub>(C=O/COO-)</sub>             |
| $C_2^2(20)$ | GERXAE, GERXEI, GERWUX01<br>* <sub>(NH)</sub> N-H $\cdots$ O <sub>(C=O/COO-)</sub> & <sub>(CH)</sub> C-H $\cdots$ O <sub>(C=O/COO-)</sub>                                                                                                                              |
| $R_2^2(10)$ | GERXAE, GERWUX01<br><sub>(NH)</sub> N-H $\cdots$ O <sub>(C=O/COO-)</sub> & <sub>(CH)</sub> C-H $\cdots$ O <sub>(C=O/COO-)</sub>                                                                                                                                        |
| $R_2^2(12)$ | GERXAE, GERXEI, GERWUX01<br><sub>(NH)</sub> N-H $\cdots$ O <sub>(C=O/COO-)</sub> & <sub>(CH)</sub> C-H $\cdots$ O <sub>(C=O/COO-)</sub>                                                                                                                                |
| $R_2^2(14)$ | DIFHOF01, GERXAE, GERXEI, GERWUX01<br><sub>(NH)</sub> N-H $\cdots$ O <sub>(C=O/COO-)</sub> & <sub>(CH)</sub> C-H $\cdots$ O <sub>(C=O/COO-)</sub><br><sub>(CH)</sub> C-H $\cdots$ O <sub>(C=O/COO-)</sub> & <sub>(CH)</sub> C-H $\cdots$ O <sub>(C=O/COO-)</sub>       |
| $R_2^2(16)$ | DIFHOF01, GERXAE, GERWUX01<br><sub>(CH)</sub> C-H $\cdots$ O <sub>(C=O/COO-)</sub> & <sub>(CH)</sub> C-H $\cdots$ O <sub>(C=O/COO-)</sub>                                                                                                                              |
| $R_2^2(17)$ | DIFHOF01, GERXAE, GERXEI, GERWUX01<br>* <sub>(CH)</sub> C-H $\cdots$ O <sub>(C=O/COO-)</sub> & <sub>(CH)</sub> C-H $\cdots$ O <sub>(C=O/COO-)</sub><br>* <sub>(NH)</sub> N-H $\cdots$ O <sub>(C=O/COO-)</sub> & <sub>(CH)</sub> C-H $\cdots$ O <sub>(C=O/COO-)</sub>   |
| $R_2^2(19)$ | GERXAE, GERXEI, GERWUX01<br>* <sub>(NH)</sub> N-H $\cdots$ O <sub>(C=O/COO-)</sub> & <sub>(NH)</sub> N-H $\cdots$ O <sub>(C=O/COO-)</sub><br>* <sub>(CH)</sub> C-H $\cdots$ O <sub>(C=O/COO-)</sub> & <sub>(CH)</sub> C-H $\cdots$ O <sub>(C=O/COO-)</sub>             |
| $R_2^3(16)$ | GERXEI, GERWUX01<br><sub>(NH)</sub> N-H $\cdots$ O <sub>(C=O/COO-)</sub> <sub>2</sub> & <sub>(NH)</sub> N-H $\cdots$ O <sub>(C=O/COO-)</sub>                                                                                                                           |
| $R_3^3(19)$ | DIFHOF01, GERXEI<br>* <sub>(NH)</sub> N-H $\cdots$ O <sub>(C=O/COO-)</sub> <sub>2</sub> & <sub>(CH)</sub> C-H $\cdots$ O <sub>(C=O/COO-)</sub>                                                                                                                         |
| $D(2)$      | IVEGIA, DIFHOF01, GERXAE<br>* <sub>(NH)</sub> N-H $\cdots$ O <sub>(C=O/COO-)</sub><br>* <sub>(CH)</sub> C-H $\cdots$ O <sub>(OH)</sub><br>* <sub>(CH)</sub> C-H $\cdots$ O <sub>(C=O/COO-)</sub>                                                                       |
| $D_3^3(11)$ | DIFHOF01, GERXAE, GERWUX01<br>* <sub>(CH)</sub> C-H $\cdots$ O <sub>(C=O)</sub> <sub>2</sub> & <sub>(CH)</sub> C-H $\cdots$ O <sub>(C=O)</sub><br>* <sub>(CH)</sub> C-H $\cdots$ O <sub>(C=O/COO-)</sub> & <sub>(CH)</sub> C-H $\cdots$ O <sub>(OH)</sub> <sub>2</sub> |
| $D_3^3(15)$ | GERXAE, GERWUX01<br>* <sub>(CH)</sub> C-H $\cdots$ O <sub>(C=O/COO-)</sub> & <sub>(CH)</sub> C-H $\cdots$ O <sub>(OH)</sub>                                                                                                                                            |
| $D_3^3(17)$ | GERXAE, GERWUX01<br>* <sub>(OH)</sub> O-H $\cdots$ N <sub>(NH)</sub> <sub>2</sub> & <sub>(NH)</sub> N-H $\cdots$ O <sub>(C=O/COO-)</sub>                                                                                                                               |
| $D_3^3(18)$ | GERXAE, GERWUX01<br><sub>(NH)</sub> N-H $\cdots$ O <sub>(C=O/COO-)</sub> & <sub>(CH)</sub> C-H $\cdots$ O <sub>(OH)</sub>                                                                                                                                              |
| $D_3^3(19)$ | GERXAE, GERWUX01<br>* <sub>(NH)</sub> N-H $\cdots$ O <sub>(C=O/COO-)</sub> & <sub>(CH)</sub> C-H $\cdots$ O <sub>(OH)</sub> <sub>2</sub>                                                                                                                               |

### Tecton III

|             |                                                                                                                                                                   |
|-------------|-------------------------------------------------------------------------------------------------------------------------------------------------------------------|
| $C(5)$      | PROLIN03, NELSEC, QANRUT<br><sub>(NH)</sub> N-H $\cdots$ O <sub>(C=O/COO-)</sub>                                                                                  |
| $C(6)$      | CH <sub>2(vcl)</sub> C <sub>4</sub> -H <sub>6</sub> $\cdots$ O <sub>1(COO_nelsec.....)</sub>                                                                      |
| $C_1^1(5)$  | PROLIN03, NELSEC, QANRUT<br><sub>(NH)</sub> N-H $\cdots$ O <sub>(C=O/COO-)</sub> & <sub>(CH)</sub> C-H $\cdots$ O <sub>(C=O/COO-)</sub>                           |
| $C_2^2(6)$  | NELSEC, NELSEC, QANRUT<br>[ <sub>(NH)</sub> N-H $\cdots$ O <sub>(C=O/COO-)</sub> ] <sub>2</sub>                                                                   |
| $C_2^2(10)$ | PROLIN03, NELSEC, QANRUT<br><sub>(NH)</sub> N-H $\cdots$ O <sub>(C=O/COO-)</sub> & <sub>(NH)</sub> N-H $\cdots$ O <sub>(C=O/COO-)</sub>                           |
| $R_4^4(14)$ | PROLIN03, NELSEC, QANRUT<br><sub>(NH)</sub> N-H $\cdots$ O <sub>(C=O/COO-)</sub> <sub>2</sub> & <sub>(NH)</sub> N-H $\cdots$ O <sub>(C=O/COO-)</sub> <sub>2</sub> |

**Table S18.** Supramolecular synthon patterns forming by COOH(COO<sup>-</sup>) in chain of proline in investigated crystals.

|             | Tecton I               | Tecton II                |
|-------------|------------------------|--------------------------|
| $C(2)$      |                        | GERXEI                   |
| $C(5)$      | FEFKEI                 | GERXAE, GERXEI           |
| $C(8)$      |                        | FIFGEG                   |
| $C(6)$      |                        | GERXEI                   |
| $C(9)$      | CIYNIH                 | GERXEI                   |
| $C(11)$     | BECWIR, FEFKEI, CIYNIH |                          |
| $C_1^1(8)$  |                        | GERXEI                   |
| $C_1^1(10)$ |                        | GERXEI                   |
| $C_1^1(11)$ |                        | GERWUX01, GERXAE, GERXEI |
| $C_1^1(16)$ | CIYNIH                 |                          |
| $C_2^2(4)$  |                        | GERWUX01, GERXAE         |
| $C_2^2(7)$  | FEFKEI                 | GERWUX01, GERXAE, FIFGEG |
| $C_2^2(9)$  | FEFKEI                 | GERXEI                   |
| $C_2^2(10)$ | BECWIR, FEFKEI         | GERWUX01, GERXAE, GERXEI |
| $C_2^2(11)$ | CIYNIH                 | GERXAE, GERXEI           |
| $C_2^2(12)$ | FEFKEI, CIYNIH         | GERXEI                   |

|                                  |                        |                                  |
|----------------------------------|------------------------|----------------------------------|
| C <sub>2</sub> <sup>2</sup> (13) | FEFKEI                 | GERWUX01, GERXAE, GERXEI         |
| C <sub>2</sub> <sup>2</sup> (14) | FEFKEI, CIYNIH         | GERXEI                           |
| C <sub>2</sub> <sup>2</sup> (15) | BECWIR, FEFKEI, CIYNIH | GERWUX01, GERXAE, GERXEI         |
| C <sub>2</sub> <sup>2</sup> (16) | FEFKEI, CIYNIH         | GERXEI                           |
| C <sub>2</sub> <sup>2</sup> (17) | BECWIR, FEFKEI, CIYNIH | GERWUX01, GERXAE, GERXEI, FIFGEG |
| C <sub>2</sub> <sup>2</sup> (18) | FEFKEI                 | GERXEI                           |
| C <sub>2</sub> <sup>2</sup> (19) | BECWIR, FEFKEI         | GERWUX01, GERXAE, GERXEI         |
| C <sub>2</sub> <sup>2</sup> (20) | BECWIR, FEFKEI, CIYNIH | GERXEI                           |
| R <sub>2</sub> <sup>1</sup> (5)  |                        | GERXEI                           |
| R <sub>2</sub> <sup>1</sup> (6)  |                        | GERWUX01, GERXAE, GERXEI         |
| R <sub>2</sub> <sup>1</sup> (7)  | BECWIR                 | GERXEI                           |
| R <sub>2</sub> <sup>1</sup> (4)  |                        | GERXEI                           |
| R <sub>2</sub> <sup>2</sup> (6)  | FEFKEI                 |                                  |
| R <sub>2</sub> <sup>2</sup> (7)  | BECWIR                 |                                  |
| R <sub>2</sub> <sup>2</sup> (11) |                        | GERXEI                           |
| R <sub>2</sub> <sup>2</sup> (13) | BECWIR, FEFKEI         | GERWUX01, GERXAE, GERXEI         |
| R <sub>2</sub> <sup>2</sup> (15) |                        | GERXAE, GERXEI                   |
| R <sub>2</sub> <sup>2</sup> (14) | BECWIR                 |                                  |
| R <sub>2</sub> <sup>2</sup> (15) |                        | GERWUX01                         |
| R <sub>2</sub> <sup>2</sup> (16) |                        | GERXEI                           |
| R <sub>2</sub> <sup>2</sup> (17) |                        | GERWUX01, GERXAE, GERXEI         |
| R <sub>2</sub> <sup>2</sup> (19) | FEFKEI                 | GERWUX01, GERXAE, GERXEI         |
| R <sub>2</sub> <sup>2</sup> (20) | BECWIR                 | GERXEI                           |
| R <sub>3</sub> <sup>2</sup> (17) |                        | GERXEI                           |
| R <sub>3</sub> <sup>2</sup> (19) |                        | GERXEI                           |
| R <sub>3</sub> <sup>2</sup> (20) |                        | GERXEI                           |
| R <sub>3</sub> <sup>3</sup> (11) |                        | GERXEI                           |
| R <sub>3</sub> <sup>3</sup> (12) |                        | GERXEI                           |
| R <sub>3</sub> <sup>3</sup> (15) |                        | GERXEI                           |
| R <sub>4</sub> <sup>4</sup> (18) |                        | GERXEI                           |
| R <sub>4</sub> <sup>4</sup> (20) |                        | GERXEI                           |
| D(2)                             | BECWIR, FEFKEI, CIYNIH | GERWUX01, GERXAE                 |
| D <sub>2</sub> <sup>1</sup> (3)  | BECWIR                 |                                  |
| D <sub>2</sub> <sup>1</sup> (5)  | BECWIR                 |                                  |
| D <sub>2</sub> <sup>2</sup> (4)  | CIYNIH                 |                                  |
| D <sub>2</sub> <sup>2</sup> (5)  | BECWIR                 |                                  |
| D <sub>2</sub> <sup>2</sup> (6)  | BECWIR                 |                                  |
| D <sub>2</sub> <sup>2</sup> (7)  | BECWIR, CIYNIH         |                                  |
| D <sub>2</sub> <sup>2</sup> (8)  | BECWIR, CIYNIH         |                                  |
| D <sub>2</sub> <sup>2</sup> (9)  | CIYNIH                 |                                  |
| D <sub>2</sub> <sup>2</sup> (12) | BECWIR                 |                                  |
| D <sub>2</sub> <sup>2</sup> (14) | BECWIR                 |                                  |
| D <sub>3</sub> <sup>2</sup> (14) | FEFKEI, CIYNIH         |                                  |
| D <sub>3</sub> <sup>3</sup> (8)  |                        | GERWUX01, GERXAE                 |
| D <sub>3</sub> <sup>3</sup> (10) | FEFKEI, CIYNIH         | GERWUX01, GERXAE                 |
| D <sub>3</sub> <sup>3</sup> (12) | CIYNIH                 | GERWUX01, GERXAE                 |
| D <sub>3</sub> <sup>3</sup> (14) | BECWIR, FEFKEI, CIYNIH |                                  |
| D <sub>3</sub> <sup>3</sup> (15) | BECWIR                 | FIFGEG                           |
| D <sub>3</sub> <sup>3</sup> (16) | BECWIR, FEFKEI, CIYNIH |                                  |
| D <sub>3</sub> <sup>3</sup> (17) | BECWIR                 | GERXAE                           |
| D <sub>3</sub> <sup>3</sup> (18) | BECWIR, FEFKEI, CIYNIH | GERWUX01, GERXAE                 |
| D <sub>3</sub> <sup>3</sup> (19) | FEFKEI                 | GERWUX01, GERXAE, FIFGEG         |
| D <sub>3</sub> <sup>3</sup> (20) | BECWIR, FEFKEI, CIYNIH | GERWUX01, GERXAE                 |
| S(6)                             | FEFKEI                 |                                  |

**Table S19.** Supramolecular synthon **patterns** formed by (NH<sub>2</sub><sup>+</sup>) in proline chain of investigated crystal structures.

| <i>Tecton I</i>                  |                        | <i>Tecton II</i>                    |
|----------------------------------|------------------------|-------------------------------------|
| C(5)                             | FEFKEI, CIYNIH         | GERXEI                              |
| C(6)                             |                        | EDALEC                              |
| C(8)                             | RUWBAM                 | DIVHOF01, FIFGEG                    |
| C <sub>2</sub> <sup>1</sup> (5)  | RUWBAM                 |                                     |
| C <sub>2</sub> <sup>1</sup> (6)  | CIYNIH                 |                                     |
| C <sub>2</sub> <sup>1</sup> (8)  | RUWBAM                 | GERXEI                              |
| C <sub>2</sub> <sup>1</sup> (10) | RUWBAM                 | DIVHOF01                            |
| C <sub>2</sub> <sup>2</sup> (7)  | FEFKEI, CIYNIH         | GERWUX01, GERXAE                    |
| C <sub>2</sub> <sup>2</sup> (9)  | BECWIR                 | GERXEI                              |
| C <sub>2</sub> <sup>2</sup> (10) | BECWIR                 | DIVHOF01, GERWUX01, GERXEI          |
| C <sub>2</sub> <sup>2</sup> (11) | QOQWAW                 | DIVHOF01, GERXEI                    |
| C <sub>2</sub> <sup>2</sup> (12) | FEFKEI, CIYNIH         |                                     |
| C <sub>2</sub> <sup>2</sup> (13) | IQISAE, RUWBAM         | DIVHOF01, GERWUX01, GERXAE, GERXEI, |
| C <sub>2</sub> <sup>2</sup> (14) | FEFKEI, CIYNIH, IQISAE | DIVHOF01, GERXEI,                   |
| C <sub>2</sub> <sup>2</sup> (15) | FEFKEI, RUWBAM         | DIVHOF01, GERWUX01, GERXAE          |

|                                  |                                        |                                    |
|----------------------------------|----------------------------------------|------------------------------------|
| C <sub>2</sub> <sup>2</sup> (16) | FEFKEI, CIYNIH, IQISAE, QOQWAW         |                                    |
| C <sub>2</sub> <sup>2</sup> (17) | CIYNIH                                 | GERWUX01, GERXAE, GERXEI           |
| C <sub>2</sub> <sup>2</sup> (18) | IQISAE, QOQWAW                         | GERXEI                             |
| C <sub>2</sub> <sup>2</sup> (19) | BECWIR, FEFKEI, CIYNIH, IQISAE, RUWBAM | GERWUX01, GERXAE, GERXEI, EDALC    |
| C <sub>2</sub> <sup>2</sup> (20) | BECWIR                                 | GERXEI                             |
| R <sub>2</sub> <sup>1</sup> (6)  | BECWIR, FEFKEI, IQISAE                 | GERWUX01, GERXAE, GERXEI           |
| R <sub>2</sub> <sup>1</sup> (7)  | BECWIR, CIYNIH                         | DIVHOF01, GERXEI                   |
| R <sub>2</sub> <sup>2</sup> (7)  | FEFKEI                                 |                                    |
| R <sub>2</sub> <sup>2</sup> (6)  | QOQWAW                                 |                                    |
| R <sub>2</sub> <sup>2</sup> (8)  |                                        | GERXAE                             |
| R <sub>2</sub> <sup>2</sup> (9)  |                                        | DIVHOF01                           |
| R22(11)                          | RUWBAM                                 |                                    |
| R <sub>2</sub> <sup>2</sup> (13) | RUWBAM                                 | GERWUX01, GERXAE, GERXEI           |
| R <sub>2</sub> <sup>2</sup> (14) |                                        | DIVHOF01                           |
| R <sub>2</sub> <sup>2</sup> (15) |                                        | GERWUX01, GERXAE                   |
| R22(17)                          |                                        | GERWUX01, GERXAE, GERXEI           |
| R22(19)                          |                                        | GERWUX01, GERXAE, GERXEI           |
| R <sub>2</sub> <sup>2</sup> (20) | BECWIR                                 |                                    |
| R23(17)                          |                                        | GERXEI                             |
| R <sub>3</sub> <sup>3</sup> (19) |                                        | DIVHOF01, GERXEI                   |
| R44(18)                          |                                        | GERXEI                             |
| D(2)                             | BECWIR, FEFKEI, CIYNIH, RUWBAM         | DIVHOF01, GERWUX01, GERXAE, FIFGEG |
| D <sub>2</sub> <sup>1</sup> (3)  | BECWIR, RUWBAM                         |                                    |
| D <sub>2</sub> <sup>2</sup> (4)  | CIYNIH                                 |                                    |
| D <sub>2</sub> <sup>2</sup> (5)  | BECWIR                                 |                                    |
| D22(6)                           | RUWBAM                                 |                                    |
| D <sub>2</sub> <sup>2</sup> (7)  | BECWIR, CIYNIH                         | FIFGEG                             |
| D <sub>2</sub> <sup>2</sup> (8)  | BECWIR                                 |                                    |
| D <sub>2</sub> <sup>2</sup> (10) | BECWIR, RUWBAM                         |                                    |
| D <sub>2</sub> <sup>2</sup> (13) | BECWIR                                 |                                    |
| D <sub>3</sub> <sup>3</sup> (8)  |                                        | GERWUX01, GERXAE                   |
| D <sub>3</sub> <sup>3</sup> (10) | FEFKEI, CIYNIH                         | GERWUX01, GERXAE                   |
| D <sub>3</sub> <sup>3</sup> (11) |                                        | GERWUX01, GERXAE                   |
| D <sub>3</sub> <sup>3</sup> (12) | CIYNIH, RUWBAM                         | DIVHOF01, GERWUX01, GERXAE         |
| D33(13)                          | RUWBAM                                 | DIVHOF01, GERWUX01, GERXAE         |
| D <sub>3</sub> <sup>3</sup> (14) | FEFKEI, CIYNIH                         | DIVHOF01, FIFGEG                   |
| D <sub>3</sub> <sup>3</sup> (15) | BECWIR, FEFKEI, RUWBAM                 | DIVHOF01, GERWUX01, GERXAE, FIFGEG |
| D <sub>3</sub> <sup>3</sup> (16) | BECWIR, FEFKEI, CIYNIH, RUWBAM         | DIVHOF01                           |
| D <sub>3</sub> <sup>3</sup> (17) | BECWIR, FEFKEI                         | DIVHOF01, GERWUX01, GERXAE         |
| D <sub>3</sub> <sup>3</sup> (18) | BECWIR                                 | GERWUX01, GERXAE, FIFGEG           |
| D <sub>3</sub> <sup>3</sup> (19) | FEFKEI                                 | DIVHOF01                           |

**Table S20.** Library of all supramolecular synthon patterns (below 20-membered motifs) in all investigated crystals (proline atoms are black, other atoms – grey, but atoms of COOH(COO<sup>-</sup>) of proline ring are in blue color, COOH (COO<sup>-</sup>) in the chain – green, while NH(NH<sub>2</sub><sup>+</sup>) in the chain of proline – pink).

| CSD ref. code             | Motif                           | Interaction (functional group)                                                                                                                                                                                                                   |
|---------------------------|---------------------------------|--------------------------------------------------------------------------------------------------------------------------------------------------------------------------------------------------------------------------------------------------|
| <b>PROLINE structures</b> |                                 |                                                                                                                                                                                                                                                  |
| <b>NELSEC</b>             | C(4)                            | (CH <sub>cycl</sub> )C2-H3...S1 <sub>cycl</sub>                                                                                                                                                                                                  |
|                           | C(5)                            | (NH <sub>2cycl</sub> )N1-H1...O1 <sub>(COO<sup>-</sup>)</sub><br>(NH <sub>2cycl</sub> )N1-H2...O2 <sub>(COO<sup>-</sup>)</sub>                                                                                                                   |
|                           | C(6)                            | (CH <sub>2cycl</sub> )C4-H6...O1 <sub>(COO<sup>-</sup>)</sub>                                                                                                                                                                                    |
| <i>level 2</i>            | C <sup>1</sup> <sub>2</sub> (5) | (NH <sub>2cycl</sub> )N1-H1...O1 <sub>(COO<sup>-</sup>)</sub> & (CH <sub>2cycl</sub> )C4-H6...O1 <sub>(COO<sup>-</sup>)</sub>                                                                                                                    |
|                           | C <sup>2</sup> <sub>2</sub> (6) | (NH <sub>2cycl</sub> )N1-H1...O1 <sub>(COO<sup>-</sup>)</sub> & (NH <sub>2cycl</sub> )N1-H2...O2 <sub>(COO<sup>-</sup>)</sub>                                                                                                                    |
|                           | C <sup>2</sup> <sub>2</sub> (7) | (NH <sub>2cycl</sub> )N1-H2...O2 <sub>(COO<sup>-</sup>)</sub> & (CH <sub>2cycl</sub> )C4-H6...O1 <sub>(COO<sup>-</sup>)</sub><br>(CH <sub>cycl</sub> )C2-H3...S1 <sub>cycl</sub> & (CH <sub>2cycl</sub> )C4-H6...O1 <sub>(COO<sup>-</sup>)</sub> |
|                           | C <sup>2</sup> <sub>2</sub> (8) | * (NH <sub>2cycl</sub> )N1-H1...O1 <sub>(COO<sup>-</sup>)</sub> & (CH <sub>cycl</sub> )C2-H3...S1 <sub>cycl</sub><br>* (NH <sub>2cycl</sub> )N1-H2...O2 <sub>(COO<sup>-</sup>)</sub> & (CH <sub>cycl</sub> )C2-H3...S1 <sub>cycl</sub>           |
|                           | C <sup>2</sup> <sub>2</sub> (9) | * (NH <sub>2cycl</sub> )N1-H1...O1 <sub>(COO<sup>-</sup>)</sub> & (CH <sub>cycl</sub> )C2-H3...S1 <sub>cycl</sub>                                                                                                                                |







|                                  |  |                                                                                                                                                                                                                         |
|----------------------------------|--|-------------------------------------------------------------------------------------------------------------------------------------------------------------------------------------------------------------------------|
|                                  |  | * <sub>(CH)</sub> C2-H3...O1 <sub>(C=O,COO-)</sub> & <sub>(CH2)</sub> C5-H8...O2 <sub>(COO-)</sub>                                                                                                                      |
| R <sup>4</sup> <sub>6</sub> (18) |  | [(NH2)N1-H1...O1 <sub>(C=O,COO-)</sub> ] <sub>4</sub> & [(NH2)N1-H2...O1 <sub>(C=O,COO-)</sub> ] <sub>2</sub><br>* <sub>(NH2)</sub> N1-H1...O1 <sub>(C=O,COO-)</sub> & <sub>(CH)</sub> C2-H3...O1 <sub>(C=O,COO-)</sub> |
| R <sup>4</sup> <sub>5</sub> (19) |  | [(NH2)N1-H1...O1 <sub>(C=O,COO-)</sub> ] <sub>3</sub> & [ <sub>(CH)</sub> C2-H3...O1 <sub>(C=O,COO-)</sub> ] <sub>2</sub>                                                                                               |

**PERINDOPRILAT structures**

|                |                                  |                                                                                                                                                                                                                                                                                                                                                                                                                                                                                                                                                                                                                                                                                                                                                                                                                                                                    |
|----------------|----------------------------------|--------------------------------------------------------------------------------------------------------------------------------------------------------------------------------------------------------------------------------------------------------------------------------------------------------------------------------------------------------------------------------------------------------------------------------------------------------------------------------------------------------------------------------------------------------------------------------------------------------------------------------------------------------------------------------------------------------------------------------------------------------------------------------------------------------------------------------------------------------------------|
| <b>BECWIR</b>  | C(11)                            | * <sub>(OH-COOH)</sub> O5-H6...O2 <sub>(COO-)</sub><br>* <sub>(OH-COOH)</sub> O10-H39...O7 <sub>(COO-)</sub>                                                                                                                                                                                                                                                                                                                                                                                                                                                                                                                                                                                                                                                                                                                                                       |
|                | D(2)                             | * <sub>(NH2+)</sub> N2-H1...O11 <sub>(C=O)</sub><br>* <sub>(NH2+)</sub> N2-H1...O8 <sub>(COO-)</sub><br>* <sub>(NH2+)</sub> N4-H33...O3 <sub>(COO-)</sub><br>* <sub>(CH2cycl)</sub> C5-H11...O9 <sub>(C=O-COOH)</sub><br>* <sub>(CH2)</sub> C12-H20...O11 <sub>(C=O)</sub><br>* <sub>(CH2)</sub> C13-H22...O8 <sub>(COO-)</sub><br>* <sub>(CH2)</sub> C29-H47...O2 <sub>(COO-)</sub><br>* <sub>(CH2)</sub> C29-H47...O3 <sub>(COO-)</sub><br>* <sub>(CH2cycl)</sub> C21-H35...O5 <sub>(OH-COOH)</sub><br>* <sub>(CH3)</sub> C35-H58...O8 <sub>(COO-)</sub><br>* <sub>(CH3)</sub> C35-H59...O3 <sub>(COO-)</sub><br>* <sub>(CH3)</sub> C36-H61...O7 <sub>(COO-)</sub>                                                                                                                                                                                               |
| <i>level 2</i> | D <sup>1</sup> <sub>2</sub> (3)  | <sub>(NH2+)</sub> N2-H1...O11 <sub>(C=O)</sub> & <sub>(NH2+)</sub> N4-H36...O11 <sub>(C=O)</sub>                                                                                                                                                                                                                                                                                                                                                                                                                                                                                                                                                                                                                                                                                                                                                                   |
|                | D <sup>2</sup> <sub>2</sub> (5)  | * <sub>(NH2+)</sub> N2-H1...O11 <sub>(C=O)</sub> & <sub>(NH2+)</sub> N2-H3...O8 <sub>(COO-)</sub><br>* <sub>(NH2+)</sub> N4-H33...O3 <sub>(COO-)</sub> & <sub>(NH2+)</sub> N4-H36...O11 <sub>(C=O)</sub>                                                                                                                                                                                                                                                                                                                                                                                                                                                                                                                                                                                                                                                           |
|                | D <sup>2</sup> <sub>2</sub> (7)  | * <sub>(NH2+)</sub> N2-H1...O11 <sub>(C=O)</sub> & <sub>(NH2+)</sub> N4-H33...O3 <sub>(COO-)</sub><br>* <sub>(NH2+)</sub> N2-H3...O8 <sub>(COO-)</sub> & <sub>(NH2+)</sub> N4-H36...O11 <sub>(C=O)</sub>                                                                                                                                                                                                                                                                                                                                                                                                                                                                                                                                                                                                                                                           |
|                | D <sup>2</sup> <sub>2</sub> (12) | <sub>(NH2+)</sub> N2-H1...O11 <sub>(C=O)</sub> & <sub>(CH2cycl)</sub> C5-H11...O9 <sub>(C=O-COOH)</sub>                                                                                                                                                                                                                                                                                                                                                                                                                                                                                                                                                                                                                                                                                                                                                            |
|                | D <sup>3</sup> <sub>3</sub> (15) | <sub>(NH2+)</sub> N2-H1...O11 <sub>(C=O)</sub> ] <sub>2</sub> & <sub>(CH2cycl)</sub> C5-H11...O9 <sub>(C=O-COOH)</sub>                                                                                                                                                                                                                                                                                                                                                                                                                                                                                                                                                                                                                                                                                                                                             |
|                | D <sup>3</sup> <sub>3</sub> (16) | * <sub>(OH-COOH)</sub> O5-H6...O2 <sub>(COO-)</sub> & <sub>(NH2+)</sub> N2-H1...O11 <sub>(C=O)</sub> ] <sub>2</sub><br>* <sub>(OH-COOH)</sub> O10-H39...O7 <sub>(COO-)</sub> & <sub>(NH2+)</sub> N2-H3...O8 <sub>(COO-)</sub> ] <sub>2</sub><br>* <sub>(OH-COOH)</sub> O10-H39...O7 <sub>(COO-)</sub> & <sub>(NH2+)</sub> N4-H33...O3 <sub>(COO-)</sub> ] <sub>2</sub><br>* <sub>(NH2+)</sub> N2-H1...O11 <sub>(C=O)</sub> ] <sub>2</sub> & <sub>(OH-COOH)</sub> O5-H6...O2 <sub>(COO-)</sub><br>* <sub>(NH2+)</sub> N2-H3...O8 <sub>(COO-)</sub> ] <sub>2</sub> & <sub>(OH-COOH)</sub> O5-H6...O2 <sub>(COO-)</sub><br>* <sub>(NH2+)</sub> N4-H33...O3 <sub>(COO-)</sub> ] <sub>2</sub> & <sub>(OH-COOH)</sub> O5-H6...O2 <sub>(COO-)</sub><br>* <sub>(NH2+)</sub> N4-H36...O11 <sub>(C=O)</sub> ] <sub>2</sub> & <sub>(NH2+)</sub> N4-H36...O11 <sub>(C=O)</sub> |
|                | C(4)                             | * <sub>(CHcycl)</sub> C1-H2...O4 <sub>(C=O-COOH)</sub><br>* <sub>(CHcycl)</sub> C18-H29...O9 <sub>(C=O-COOH)</sub>                                                                                                                                                                                                                                                                                                                                                                                                                                                                                                                                                                                                                                                                                                                                                 |
|                | C(6)                             | * <sub>(CHcycl)</sub> C3-H7...O4 <sub>(C=O-COOH)</sub><br>* <sub>(CHcycl)</sub> C20-H32...O9 <sub>(C=O-COOH)</sub>                                                                                                                                                                                                                                                                                                                                                                                                                                                                                                                                                                                                                                                                                                                                                 |

|             |                                                                                                                                                                                                                                                                                                                                   |
|-------------|-----------------------------------------------------------------------------------------------------------------------------------------------------------------------------------------------------------------------------------------------------------------------------------------------------------------------------------|
| $C^2_2(9)$  | $(NH_2^+)N2-H1 \cdots O11_{(C=O)}$ & $(CH_3)C35-H59 \cdots O3_{(COO^-)}$                                                                                                                                                                                                                                                          |
| $C^2_2(10)$ | $*(NH_2^+)N2-H3 \cdots O8_{(COO^-)}$ & $(CH_2)C29-H47 \cdots O2_{(COO^-)}$<br>$*(NH_2^+)N2-H3 \cdots O8_{(COO^-)}$ & $(NH_2^+)N4-H33 \cdots O3_{(COO^-)}$<br>$*(NH_2^+)N2-H3 \cdots O8_{(COO^-)}$ & $(CH_2)C29-H47 \cdots O3_{(COO^-)}$<br>$*(CH_{cycl})C1-H2 \cdots O4_{(C=O-COOH)}$ & $(CH_{cycl})C3-H7 \cdots O4_{(C=O-COOH)}$ |
| $C^2_2(14)$ | $(CH_{cycl})C1-H2 \cdots O4_{(C=O-COOH)}$ & $(CH_2)C12-H19 \cdots O5_{(OH-COOH)}$                                                                                                                                                                                                                                                 |
| $C^2_2(15)$ | $*(OH-COOH)O5-H6 \cdots O2_{(COO^-)}$ & $(CH_{cycl})C1-H2 \cdots O4_{(C=O-COOH)}$<br>$*((CH_2)_{cycl})C5-H11 \cdots O9_2$ & $(CH_2)_{cycl})C21-H35 \cdots O5_{(OH-COOH)}$                                                                                                                                                         |
| $C^2_2(16)$ | $(CH_{cycl})C3-H7 \cdots O4_{(C=O-COOH)}$ & $(CH_2)C12-H19 \cdots O5_{(OH-COOH)}$                                                                                                                                                                                                                                                 |
| $C^2_2(17)$ | $(OH-COOH)O5-H6 \cdots O2_{(COO^-)}$ & $(CH_{cycl})C3-H7 \cdots O4_{(C=O-COOH)}$                                                                                                                                                                                                                                                  |
| $C^2_2(19)$ | $(NH_2^+)N2-H3 \cdots O8_{(COO^-)}$ & $(CH_2)_{cycl})C21-H35 \cdots O5_{(OH-COOH)}$                                                                                                                                                                                                                                               |
| $C^2_2(20)$ | $(NH_2^+)N2-H3 \cdots O8_{(COO^-)}$ & $(CH_2)_{cycl})C5-H11 \cdots O9_{(C=O-COOH)}$                                                                                                                                                                                                                                               |
| $R^1_2(6)$  | $*(NH_2^+)N2-H1 \cdots O11_{(C=O)}$ & $(CH_2)C12-H20 \cdots O11_{(C=O)}$<br>$*(CH_{cycl})C1-H2 \cdots O4_{(C=O-COOH)}$ & $(CH_{cycl})C3-H7 \cdots O4_{(C=O-COOH)}$                                                                                                                                                                |
| $R^1_2(7)$  | $(NH_2^+)N2-H3 \cdots O8_{(COO^-)}$ & $(CH_2)C13-H22 \cdots O8_{(COO^-)}$                                                                                                                                                                                                                                                         |
| $R^2_2(7)$  | $(OH-COOH)O5-H6 \cdots O2_{(COO^-)}$ & $(CH_2)C12-H19 \cdots O5_{(OH-COOH)}$                                                                                                                                                                                                                                                      |
| $R^2_2(12)$ | $(CH_{cycl})C1-H2 \cdots O4_{(C=O-COOH)}$ & $(CH_2)C12-H19 \cdots O5_{(OH-COOH)}$                                                                                                                                                                                                                                                 |
| $R^2_2(13)$ | $*(OH-COOH)O5-H6 \cdots O2_{(COO^-)}$ & $(CH_{cycl})C1-H2 \cdots O4_{(C=O-COOH)}$<br>$*(CH_{cycl})C3-H7 \cdots O4_{(C=O-COOH)}$ & $(CH_2)C12-H19 \cdots O5_{(OH-COOH)}$                                                                                                                                                           |
| $R^2_2(14)$ | $(OH-COOH)O5-H6 \cdots O2_{(COO^-)}$ & $(CH_{cycl})C3-H7 \cdots O4_{(C=O-COOH)}$                                                                                                                                                                                                                                                  |
| $R^2_2(20)$ | $(NH_2^+)N4-H33 \cdots O3_{(COO^-)}$ & $(CH_2)_{cycl})C5-H11 \cdots O9_{(C=O-COOH)}$                                                                                                                                                                                                                                              |
| $D^1_2(3)$  | $(NH_2^+)N2-H3 \cdots O8_{(COO^-)}$ & $(CH_3)C35-H58 \cdots O8_{(COO^-)}$                                                                                                                                                                                                                                                         |
| $D^2_2(5)$  | $(NH_2^+)N2-H3 \cdots O8_{(COO^-)}$ & $(CH_3)C36-H61 \cdots O7_{(COO^-)}$                                                                                                                                                                                                                                                         |
| $D^2_2(6)$  | $*(cycl)N1-H1 \cdots O11_{(C=O)}$ & $(CH_3)C35-H58 \cdots O8_{(COO^-)}$<br>$*(cycl)N1-H1 \cdots O11_{(C=O)}$ & $(CH_3)C36-H61 \cdots O7_{(COO^-)}$                                                                                                                                                                                |
| $D^2_2(7)$  | $*(cycl)N1-H1 \cdots O11_{(C=O)}$ & $(CH_2)C29-H47 \cdots O2_{(COO^-)}$<br>$*(cycl)N1-H1 \cdots O11_{(C=O)}$ & $(CH_2)C29-H47 \cdots O3_{(COO^-)}$<br>$*(NH_2^+)N2-H3 \cdots O8_{(COO^-)}$ & $(CH_2)C12-H20 \cdots O11_{(C=O)}$<br>$*(NH_2^+)N2-H3 \cdots O8_{(COO^-)}$ & $(CH_3)C35-H59 \cdots O3_{(COO^-)}$                     |
| $D^2_2(8)$  | $(NH_2^+)N2-H1 \cdots O11_{(C=O)}$ & $(CH_2)C13-H22 \cdots O8_{(COO^-)}$                                                                                                                                                                                                                                                          |
| $D^2_2(10)$ | $*(NH_2^+)N2-H1 \cdots O11_{(C=O)}$ & $(CH_2)_{cycl})C21-H35 \cdots O5_{(OH-COOH)}$<br>$*(NH_2^+)N4-H36 \cdots O11_{(C=O)}$ & $(CH_2)_{cycl})C5-H11 \cdots O9_{(C=O-COOH)}$                                                                                                                                                       |
| $D^2_2(12)$ | $*(CH_2)_{cycl})C5-H11 \cdots O9_{(C=O-COOH)}$ & $(CH_3)C35-H58 \cdots O8_{(COO^-)}$<br>$*(CH_2)_{cycl})C5-H11 \cdots O9_{(C=O-COOH)}$ & $(CH_3)C36-H61 \cdots O7_{(COO^-)}$                                                                                                                                                      |
| $D^2_2(14)$ | $(CH_2)_{cycl})C5-H11 \cdots O9_{(C=O-COOH)}$ & $(CH_2)C12-H20 \cdots O11_{(C=O)}$<br>$(CH_2)_{cycl})C5-H11 \cdots O9_{(C=O-COOH)}$ & $(CH_3)C35-H59 \cdots O3_{(COO^-)}$                                                                                                                                                         |
| $D^2_3(7)$  | $((CH_2)_{cycl})C5-H11 \cdots O9_{(C=O-COOH)}_2$ & $(CH_{cycl})C18-H23 \cdots O9_{(C=O-COOH)}$                                                                                                                                                                                                                                    |

|                |             |                                                                                                                                                                                                                                                                                                                                                                                                                                                                                                                                                                                                                                                                                                                                                                                           |
|----------------|-------------|-------------------------------------------------------------------------------------------------------------------------------------------------------------------------------------------------------------------------------------------------------------------------------------------------------------------------------------------------------------------------------------------------------------------------------------------------------------------------------------------------------------------------------------------------------------------------------------------------------------------------------------------------------------------------------------------------------------------------------------------------------------------------------------------|
|                | $D_3^2(13)$ | $(\text{CH}_2)\text{C12-H19}\cdots\text{O5}_{(\text{OH-COOH})}$ & $(\text{CH}_2\text{cycl})\text{C21-H35}\cdots\text{O5}_{(\text{OH-COOH})}_2$                                                                                                                                                                                                                                                                                                                                                                                                                                                                                                                                                                                                                                            |
|                | $D_3^3(9)$  | $*(\text{CH}_2\text{cycl})\text{C5-H11}\cdots\text{O9}_{(\text{C=O-COOH})}_2$ & $(\text{CHcycl})\text{C20-H37}\cdots\text{O9}_{(\text{C=O-COOH})}$<br><br>$*(\text{CH}_2\text{cycl})\text{C21-H35}\cdots\text{O5}_{(\text{OH-COOH})}_2$                                                                                                                                                                                                                                                                                                                                                                                                                                                                                                                                                   |
|                | $D_3^3(11)$ | $(\text{CHcycl})\text{C3-H7}\cdots\text{O4}_{(\text{C=O-COOH})}$ & $(\text{CH}_2\text{cycl})\text{C21-H35}\cdots\text{O5}_{(\text{OH-COOH})}_2$                                                                                                                                                                                                                                                                                                                                                                                                                                                                                                                                                                                                                                           |
|                | $D_3^3(14)$ | $*(\text{OH-COOH})\text{O5-H6}\cdots\text{O2}_{(\text{COO-})}$ & $(\text{CH}_2\text{cycl})\text{C21-H35}\cdots\text{O5}_{(\text{OH-COOH})}_2$<br><br>$*(\text{OH-COOH})\text{O5-H6}\cdots\text{O2}_{(\text{COO-})}$ & $(\text{CH}_2)\text{C29-H47}\cdots\text{O2}_{(\text{COO-})}_2$<br><br>$*(\text{OH-COOH})\text{O5-H6}\cdots\text{O2}_{(\text{COO-})}$ & $(\text{CH}_3)\text{C35-H59}\cdots\text{O3}_{(\text{COO-})}_2$                                                                                                                                                                                                                                                                                                                                                               |
|                | $D_3^3(15)$ | $*(\text{NH}_2+)\text{N2-H3}\cdots\text{O8}_{(\text{COO-})}_2$ & $(\text{CH}_2)\text{C12-H19}\cdots\text{O5}_{(\text{OH-COOH})}$<br><br>$*(\text{CHcycl})\text{C3-H7}\cdots\text{O4}_{(\text{C=O-COOH})}$ & $(\text{acycl})\text{C15-H11}\cdots\text{O9}_{(\text{C=O-COOH})}_2$<br><br>$*(\text{CH}_2)\text{C12-H19}\cdots\text{O5}_{(\text{OH-COOH})}$ & $(\text{CH}_2)\text{C12-H20}\cdots\text{O11}_{(\text{C=O})}_2$                                                                                                                                                                                                                                                                                                                                                                  |
|                | $D_3^3(16)$ | $*(\text{OH-COOH})\text{O5-H6}\cdots\text{O2}_{(\text{COO-})}$ & $(\text{CH}_2)\text{C29-H47}\cdots\text{O3}_{(\text{COO-})}_2$<br><br>$*(\text{CH}_2\text{cycl})\text{C5-H11}\cdots\text{O9}_{(\text{C=O-COOH})}$                                                                                                                                                                                                                                                                                                                                                                                                                                                                                                                                                                        |
|                | $D_3^3(17)$ | $*(\text{NH}_2+)\text{N2-H1}\cdots\text{O11}_{(\text{C=O})}_2$ & $(\text{CHcycl})\text{C1-H2}\cdots\text{O4}_{(\text{C=O-COOH})}$<br><br>$*(\text{NH}_2+)\text{N2-H3}\cdots\text{O8}_{(\text{COO-})}_2$ & $(\text{CHcycl})\text{C1-H2}\cdots\text{O4}_{(\text{C=O-COOH})}$<br><br>$*(\text{NH}_2+)\text{N4-H33}\cdots\text{O3}_{(\text{COO-})}$ & $(\text{CH}_2)\text{C12-H19}\cdots\text{O5}_{(\text{OH-COOH})}$<br><br>$*(\text{CHcycl})\text{C1-H2}\cdots\text{O4}_{(\text{C=O-COOH})}$ & $(\text{CH}_2\text{cycl})\text{C5-H11}\cdots\text{O9}_{(\text{C=O-COOH})}_2$<br><br>$*(\text{CH}_2)\text{C12-H19}\cdots\text{O5}_{(\text{OH-COOH})}$ & $(\text{CH}_2)\text{C13-H22}\cdots\text{O8}_{(\text{COO-})}_2$<br><br>$*(\text{CH}_2)\text{C29-H47}\cdots\text{O2}_{(\text{COO-})}_3$ |
|                | $D_3^3(18)$ | $*(\text{OH-COOH})\text{O5-H6}\cdots\text{O2}_{(\text{COO-})}$ & $(\text{CH}_2)\text{C12-H20}\cdots\text{O11}_{(\text{C=O})}_2$<br><br>$*(\text{NH}_2+)\text{N2-H1}\cdots\text{O11}_{(\text{C=O})}_2$ & $(\text{CHcycl})\text{C3-H7}\cdots\text{O4}_{(\text{C=O-COOH})}$<br><br>$*(\text{NH}_2+)\text{N2-H3}\cdots\text{O8}_{(\text{COO-})}_2$ & $(\text{CHcycl})\text{C3-H7}\cdots\text{O4}_{(\text{C=O-COOH})}$                                                                                                                                                                                                                                                                                                                                                                         |
|                | $D_3^3(20)$ | $(\text{OH-COOH})\text{O5-H6}\cdots\text{O2}_{(\text{COO-})}$ & $(\text{CH}_2)\text{C13-H22}\cdots\text{O8}_{(\text{COO-})}_2$                                                                                                                                                                                                                                                                                                                                                                                                                                                                                                                                                                                                                                                            |
| <b>FEFKEI</b>  | $S(6)$      | $(\text{CH})\text{C10-H17}\cdots\text{O2}_{(\text{COO-})}$                                                                                                                                                                                                                                                                                                                                                                                                                                                                                                                                                                                                                                                                                                                                |
|                | $C(4)$      | $(\text{CHcycl})\text{C1-H1}\cdots\text{O4}_{(\text{C=O-COOH})}$                                                                                                                                                                                                                                                                                                                                                                                                                                                                                                                                                                                                                                                                                                                          |
|                | $C(5)$      | $(\text{NH}_2+)\text{N2-H2}\cdots\text{O2}_{(\text{COO-})}$                                                                                                                                                                                                                                                                                                                                                                                                                                                                                                                                                                                                                                                                                                                               |
|                | $C(6)$      | $(\text{CH}_2\text{cycl})\text{C2-H4}\cdots\text{O1}_{(\text{C=O})}$                                                                                                                                                                                                                                                                                                                                                                                                                                                                                                                                                                                                                                                                                                                      |
|                | $C(7)$      | $(\text{CH}_2\text{cycl})\text{C4-H7}\cdots\text{O1}_{(\text{C=O})}$                                                                                                                                                                                                                                                                                                                                                                                                                                                                                                                                                                                                                                                                                                                      |
|                | $C(8)$      | $(\text{CH}_2\text{cycl})\text{C6-H13}\cdots\text{O5}_{(\text{OH-COOH})}$                                                                                                                                                                                                                                                                                                                                                                                                                                                                                                                                                                                                                                                                                                                 |
|                | $C(9)$      | $(\text{CH})\text{C11-H18}\cdots\text{O5}_{(\text{OH-COOH})}$                                                                                                                                                                                                                                                                                                                                                                                                                                                                                                                                                                                                                                                                                                                             |
|                | $C(11)$     | $(\text{CH}_2\text{cycl})\text{C5-H11}\cdots\text{O3}_{(\text{COO-})}$                                                                                                                                                                                                                                                                                                                                                                                                                                                                                                                                                                                                                                                                                                                    |
|                | $D(2)$      | $*(\text{OH}_2)\text{O6-H29}\cdots\text{O3}_{(\text{COO-})}$<br><br>$*(\text{OH}_2)\text{O6-H30}\cdots\text{O1}_{(\text{C=O})}$<br><br>$*(\text{NH}_2+)\text{N2-H3}\cdots\text{O6}_{(\text{OH}_2)}$<br><br>$*(\text{CH}_3)\text{C16-H26}\cdots\text{O6}_{(\text{OH}_2)}$                                                                                                                                                                                                                                                                                                                                                                                                                                                                                                                  |
| <i>level 2</i> | $C_2^1(6)$  | $(\text{CH}_2\text{cycl})\text{C2-H4}\cdots\text{O1}_{(\text{C=O})}$ & $(\text{CH}_2\text{cycl})\text{C4-H7}\cdots\text{O1}_{(\text{C=O})}$                                                                                                                                                                                                                                                                                                                                                                                                                                                                                                                                                                                                                                               |
|                | $C_2^1(11)$ | $(\text{CH}_2\text{cycl})\text{C6-H13}\cdots\text{O5}_{(\text{OH-COOH})}$ & $(\text{CH})\text{C11-H18}\cdots\text{O5}_{(\text{OH-COOH})}$                                                                                                                                                                                                                                                                                                                                                                                                                                                                                                                                                                                                                                                 |

|             |                                                                                                                                                                                                                                                                                                                                                            |
|-------------|------------------------------------------------------------------------------------------------------------------------------------------------------------------------------------------------------------------------------------------------------------------------------------------------------------------------------------------------------------|
| $C_2^2(7)$  | $(OH_2)O_6-H_{29} \cdots O_3(COO^-) \& (NH_2^+)N_2-H_3 \cdots O_6(OH_2)$                                                                                                                                                                                                                                                                                   |
| $C_2^2(9)$  | $(OH_2)O_6-H_{29} \cdots O_3(COO^-) \& (CH_3)C_{16}-H_{26} \cdots O_6(OH_2)$                                                                                                                                                                                                                                                                               |
| $C_2^2(10)$ | * $(OH_2)O_6-H_{29} \cdots O_3(COO^-) \& (OH_2)O_6-H_{30} \cdots O_1(C=O)$<br>* $(CH_{cycl})C_1-H_1 \cdots O_4(C=O\_COOH) \& (CH_{2cycl})C_2-H_4 \cdots O_1(C=O)$<br>* $(CH_{cycl})C_1-H_1 \cdots O_4(C=O\_COOH) \& (CH_{2cycl})C_6-H_{13} \cdots O_5(OH\_COOH)$                                                                                           |
| $C_2^2(11)$ | $(CH_{2cycl})C_4-H_7 \cdots O_1(C=O) \& (CH_{2cycl})C_6-H_{13} \cdots O_5(OH\_COOH)$                                                                                                                                                                                                                                                                       |
| $C_2^2(12)$ | * $(OH\_COOH)O_5-H_{11} \cdots O_3(COO^-) \& (NH_2^+)N_2-H_2 \cdots O_2(COO^-)$<br>* $(NH_2^+)N_2-H_2 \cdots O_2(COO^-) \& (CH)C_{11}-H_{18} \cdots O_5(OH\_COOH)$<br>* $(CH_{cycl})C_1-H_1 \cdots O_4(C=O\_COOH) \& (CH_{2cycl})C_4-H_7 \cdots O_1(C=O)$<br>* $(CH_{2cycl})C_2-H_4 \cdots O_1(C=O) \& (CH_{2cycl})C_6-H_{13} \cdots O_5(OH\_COOH)$        |
| $C_2^2(13)$ | * $(OH\_COOH)O_5-H_{11} \cdots O_3(COO^-) \& (CH_{2cycl})C_6-H_{13} \cdots O_5(OH\_COOH)$<br>* $(CH_{cycl})C_1-H_1 \cdots O_4(C=O\_COOH) \& (CH)C_{11}-H_{18} \cdots O_5(OH\_COOH)$<br>* $(CH_{2cycl})C_2-H_4 \cdots O_1(C=O) \& (CH_{2cycl})C_4-H_7 \cdots O_1(C=O)$<br>* $(CH_{2cycl})C_4-H_7 \cdots O_1(C=O) \& (CH)C_{11}-H_{18} \cdots O_5(OH\_COOH)$ |
| $C_2^2(14)$ | * $(NH_2^+)N_2-H_2 \cdots O_2(COO^-) \& (CH)C_{11}-H_{18} \cdots O_5(OH\_COOH)$<br>* $(CH_{2cycl})C_4-H_7 \cdots O_1(C=O) \& (CH_{2cycl})C_6-H_{13} \cdots O_5(OH\_COOH)$                                                                                                                                                                                  |
| $C_2^2(15)$ | * $(OH\_COOH)O_5-H_{11} \cdots O_3(COO^-) \& (CH_{cycl})C_1-H_1 \cdots O_4(C=O\_COOH)$<br>* $(OH\_COOH)O_5-H_{11} \cdots O_3(COO^-) \& (CH_{2cycl})C_4-H_7 \cdots O_1(C=O)$<br>* $(NH_2^+)N_2-H_2 \cdots O_2(COO^-) \& (CH_{2cycl})C_2-H_4 \cdots O_1(C=O)$<br>* $(CH_{2cycl})C_2-H_4 \cdots O_1(C=O) \& (CH)C_{11}-H_{18} \cdots O_5(OH\_COOH)$           |
| $C_2^2(16)$ | * $(OH\_COOH)O_5-H_{11} \cdots O_3(COO^-) \& (NH_2^+)N_2-H_2 \cdots O_2(COO^-)$<br>* $(NH_2^+)N_2-H_2 \cdots O_2(COO^-) \& (CH_{2cycl})C_4-H_7 \cdots O_1(C=O)$<br>* $(CH_{2cycl})C_4-H_7 \cdots O_1(C=O) \& (CH)C_{11}-H_{18} \cdots O_5(OH\_COOH)$                                                                                                       |
| $C_2^2(17)$ | * $(OH\_COOH)O_5-H_{11} \cdots O_3(COO^-) \& (CH_{2cycl})C_2-H_4 \cdots O_1(C=O)$<br>* $(cycl)N_1-H_2 \cdots O_2(COO^-) \& (CH_{cycl})C_1-H_1 \cdots O_4(C=O\_COOH)$                                                                                                                                                                                       |
| $C_2^2(18)$ | $(OH\_COOH)O_5-H_{11} \cdots O_3(COO^-) \& (CH_{2cycl})C_4-H_7 \cdots O_1(C=O)$                                                                                                                                                                                                                                                                            |
| $C_2^2(19)$ | $(NH_2^+)N_2-H_2 \cdots O_2(COO^-) \& (CH_{2cycl})C_6-H_{13} \cdots O_5(OH\_COOH)$                                                                                                                                                                                                                                                                         |
| $C_2^2(20)$ | $(OH\_COOH)O_5-H_{11} \cdots O_3(COO^-) \& (CH)C_{11}-H_{18} \cdots O_5(OH\_COOH)$                                                                                                                                                                                                                                                                         |
| $C_3^4(19)$ | $((CH_{2cycl})C_2-H_4 \cdots O_1)_2 \& (CH_{2cycl})C_4-H_7 \cdots O_1(C=O)$                                                                                                                                                                                                                                                                                |
| $R_2^1(6)$  | $(NH_2^+)N_2-H_3 \cdots O_6(OH_2) \& (CH_3)C_{16}-H_{26} \cdots O_6(OH_2)$                                                                                                                                                                                                                                                                                 |
| $R_2^2(6)$  | $(OH\_COOH)O_5-H_{11} \cdots O_3(COO^-) \& (CH)C_{11}-H_{18} \cdots O_5(OH\_COOH)$                                                                                                                                                                                                                                                                         |
| $R_2^2(7)$  | * $(OH_2)O_6-H_{30} \cdots O_1(C=O) \& (NH_2^+)N_2-H_3 \cdots O_6(OH_2)$<br>* $(OH_2)O_6-H_{30} \cdots O_1(C=O) \& (CH_3)C_{16}-H_{26} \cdots O_6(OH_2)$                                                                                                                                                                                                   |
| $R_2^2(10)$ | $(CH_{cycl})C_1-H_1 \cdots O_4(C=O\_COOH) \& (CH_{2cycl})C_2-H_4 \cdots O_1(C=O)$                                                                                                                                                                                                                                                                          |
| $R_2^2(11)$ | * $(CH_{cycl})C_1-H_1 \cdots O_4(C=O\_COOH) \& (CH)C_{11}-H_{18} \cdots O_5(OH\_COOH)$<br>* $(CH_{2cycl})C_2-H_4 \cdots O_1(C=O) \& (CH)C_{11}-H_{18} \cdots O_5(OH\_COOH)$                                                                                                                                                                                |
| $R_2^2(12)$ | $(CH_{cycl})C_1-H_1 \cdots O_4(C=O\_COOH) \& (CH_{2cycl})C_6-H_{13} \cdots O_5(OH\_COOH)$                                                                                                                                                                                                                                                                  |

|             |                                                                                                                                                                                                                                                                                                                                                                                                                                                                                                              |
|-------------|--------------------------------------------------------------------------------------------------------------------------------------------------------------------------------------------------------------------------------------------------------------------------------------------------------------------------------------------------------------------------------------------------------------------------------------------------------------------------------------------------------------|
| $R^2_2(13)$ | $^*(_{(OH\_COOH)}O5-H11 \cdots O3_{(COO^-)} \& (CH_{cycl})C1-H1 \cdots O4_{(C=O\_COOH)}$<br>$^*(_{(OH\_COOH)}O5-H11 \cdots O3_{(COO^-)} \& (CH_{2cycl})C2-H4 \cdots O1_{(C=O)}$<br>$^*(CH_{2cycl})C2-H4 \cdots O1_{(C=O)} \& (CH_{2cycl})C6-H13 \cdots O5_{(OH\_COOH)}$                                                                                                                                                                                                                                      |
| $R^2_2(17)$ | $(CH_{2cycl})C6-H13 \cdots O5_{(OH\_COOH)} \& (CH)C11-H18 \cdots O5_{(OH\_COOH)}$                                                                                                                                                                                                                                                                                                                                                                                                                            |
| $R^2_2(19)$ | $(OH\_COOH)O5-H11 \cdots O3_{(COO^-)} \& (CH_{2cycl})C6-H13 \cdots O5_{(OH\_COOH)}$                                                                                                                                                                                                                                                                                                                                                                                                                          |
| $R^3_4(19)$ | $(CH_{2cycl})C2-H4 \cdots O1_{(C=O)}_2 \& (CH_{2cycl})C4-H7 \cdots O1_{(C=O)}$                                                                                                                                                                                                                                                                                                                                                                                                                               |
| $D^2_3(9)$  | $(_{(OH_2)}O6-H30 \cdots O1_{(C=O)})_2 \& (CH_{2cycl})C2-H4 \cdots O1_{(C=O)}$                                                                                                                                                                                                                                                                                                                                                                                                                               |
| $D^2_3(10)$ | $(_{(OH_2)}O6-H30 \cdots O1_{(C=O)})_2 \& (CH_{2cycl})C4-H7 \cdots O1_{(C=O)}$                                                                                                                                                                                                                                                                                                                                                                                                                               |
| $D^2_3(14)$ | $(OH\_COOH)O5-H11 \cdots O3_{(COO^-)} \& (_{(OH_2)}O6-H29 \cdots O3_{(COO^-)})_2$                                                                                                                                                                                                                                                                                                                                                                                                                            |
| $D^3_3(10)$ | $^*(_{(OH_2)}O6-H29 \cdots O3_{(COO^-)})_2 \& (NH_{2+})N2-H2 \cdots O2_{(COO^-)}$<br>$^*(NH_{2+})N2-H2 \cdots O2_{(COO^-)} \& (NH_{2+})N2-H3 \cdots O6_{(OH_2)}_2$                                                                                                                                                                                                                                                                                                                                           |
| $D^3_3(13)$ | $(CH_{cycl})C1-H1 \cdots O4_{(C=O\_COOH)} \& (_{(OH_2)}O6-H30 \cdots O1_{(C=O)})_2$                                                                                                                                                                                                                                                                                                                                                                                                                          |
| $D^3_3(14)$ | $^*(_{(OH_2)}O6-H30 \cdots O1_{(C=O)})_2 \& (NH_{2+})N2-H2 \cdots O2_{(COO^-)}$<br>$^*(_{(OH_2)}O6-H30 \cdots O1_{(C=O)})_2 \& (CH)C11-H18 \cdots O5_{(OH\_COOH)}$<br>$^*(NH_{2+})N2-H2 \cdots O2_{(COO^-)} \& (CH_3)C16-H26 \cdots O6_{(OH_2)}_2$<br>$^*(NH_{2+})N2-H3 \cdots O6_{(OH_2)}_2 \& (CH)C11-H18 \cdots O5_{(OH\_COOH)}$                                                                                                                                                                          |
| $D^3_3(15)$ | $^*(_{(OH_2)}O6-H30 \cdots O1_{(C=O)})_2 \& (CH_{2cycl})C6-H13 \cdots O5_{(OH\_COOH)}$<br>$^*(NH_{2+})N2-H3 \cdots O6_{(OH_2)}_2 \& (CH_{2cycl})C2-H4 \cdots O1_{(C=O)}$<br>$^*(CH_{2cycl})C2-H4 \cdots O1_{(C=O)} \& (CH_3)C16-H26 \cdots O6_{(OH_2)}_2$                                                                                                                                                                                                                                                    |
| $D^3_3(16)$ | $^*(OH\_COOH)O5-H11 \cdots O3_{(COO^-)} \& (NH_{2+})N2-H3 \cdots O6_{(OH_2)}_2$<br>$^*(OH\_COOH)O5-H11 \cdots O3_{(COO^-)} \& (_{(OH_2)}O6-H30 \cdots O1_{(C=O)})_2$<br>$^*(_{(OH_2)}O6-H29 \cdots O3_{(COO^-)})_2 \& (CH)C11-H18 \cdots O5_{(OH\_COOH)}$<br>$^*(NH_{2+})N2-H3 \cdots O6_{(OH_2)}_2 \& (CH_{2cycl})C4-H7 \cdots O1_{(C=O)}$<br>$^*(CH_{2cycl})C4-H7 \cdots O1_{(C=O)} \& (CH_3)C16-H26 \cdots O6_{(OH_2)}_2$<br>$^*(CH)C11-H18 \cdots O5_{(OH\_COOH)} \& (CH_3)C16-H26 \cdots O6_{(OH_2)}_2$ |
| $D^3_3(17)$ | $^*(NH_{2+})N2-H3 \cdots O6_2 \& (CH_{cycl})C1-H1 \cdots O4_{(C=O\_COOH)}$<br>$^*(CH_{cycl})C1-H1 \cdots O4_{(C=O\_COOH)} \& (CH_3)C16-H26 \cdots O6_{(OH_2)}_2$                                                                                                                                                                                                                                                                                                                                             |
| $D^3_3(18)$ | $(OH\_COOH)O5-H11 \cdots O3_{(COO^-)} \& (CH_3)C16-H26 \cdots O6_{(OH_2)}_2$                                                                                                                                                                                                                                                                                                                                                                                                                                 |
| $D^3_3(19)$ | $^*(_{(OH_2)}O6-H29 \cdots O3_{(COO^-)})_2 \& (CH_{2cycl})C2-H4 \cdots O1_{(C=O)}$<br>$^*(NH_{2+})N2-H3 \cdots O6_{(OH_2)}_2 \& (CH_{2cycl})C6-H13 \cdots O5_{(OH\_COOH)}$<br>$^*(CH_{2cycl})C6-H13 \cdots O5_{(OH\_COOH)} \& (CH_3)C16-H26 \cdots O6_{(OH_2)}_2$                                                                                                                                                                                                                                            |
| $D^3_3(20)$ | $(_{(OH_2)}O6-H29 \cdots O3_{(COO^-)})_2 \& (CH_{2cycl})C4-H7 \cdots O1_{(C=O)}$                                                                                                                                                                                                                                                                                                                                                                                                                             |

**DKP PERINDOPRIL structures**

|               |        |                                                                                                                   |
|---------------|--------|-------------------------------------------------------------------------------------------------------------------|
| <b>BILNAN</b> | $D(2)$ | $(CH_{cycl})C1-H1 \cdots O8_{(C=O)}$<br>$(CH_{cycl})C10-H14 \cdots O8_{(C=O)}$<br>$(CH)C11-H15 \cdots O6_{(C=O)}$ |
|---------------|--------|-------------------------------------------------------------------------------------------------------------------|

|  |                                  |                                                                                                                                                                                                                                                                                                                                                                                                                                                                                                                                                                                                                                                     |
|--|----------------------------------|-----------------------------------------------------------------------------------------------------------------------------------------------------------------------------------------------------------------------------------------------------------------------------------------------------------------------------------------------------------------------------------------------------------------------------------------------------------------------------------------------------------------------------------------------------------------------------------------------------------------------------------------------------|
|  |                                  | (CH <sub>cycl</sub> )C20-H31···O2 <sub>(C=O)</sub><br>(CH <sub>2cycl</sub> )C24-H38···O1 <sub>(C=O)</sub><br>(CH <sub>cycl</sub> )C29-H44···O4 <sub>(C=O)</sub><br>(CH)C30-H45···O2 <sub>(C=O)</sub>                                                                                                                                                                                                                                                                                                                                                                                                                                                |
|  | C(10)                            | (CH <sub>3</sub> )C38-H59···O5 <sub>(C=O)</sub>                                                                                                                                                                                                                                                                                                                                                                                                                                                                                                                                                                                                     |
|  | C <sup>1</sup> <sub>2</sub> (7)  | (CH <sub>cycl</sub> )C20-H31···O2 <sub>(C=O)</sub> & (CH)C30-H45···O2 <sub>(C=O)</sub>                                                                                                                                                                                                                                                                                                                                                                                                                                                                                                                                                              |
|  | C <sup>2</sup> <sub>2</sub> (9)  | (CH <sub>cycl</sub> )C1-H1···O8 <sub>(C=O)</sub> & (CH <sub>cycl</sub> )C29-H44···O4 <sub>(C=O)</sub>                                                                                                                                                                                                                                                                                                                                                                                                                                                                                                                                               |
|  | C <sup>2</sup> <sub>2</sub> (10) | * <sub>(CH<sub>cycl</sub>)</sub> C10-H14···O8 <sub>(C=O)</sub> & (CH <sub>cycl</sub> )C20-H31···O2 <sub>(C=O)</sub><br>* <sub>(CH<sub>cycl</sub>)</sub> C10-H14···O8 <sub>(C=O)</sub> & (CH <sub>cycl</sub> )C29-H44···O4 <sub>(C=O)</sub>                                                                                                                                                                                                                                                                                                                                                                                                          |
|  | C <sup>2</sup> <sub>2</sub> (11) | * <sub>(CH<sub>cycl</sub>)</sub> C1-H1···O8 <sub>(C=O)</sub> & (CH <sub>cycl</sub> )C20-H31···O2 <sub>(C=O)</sub><br>* <sub>(CH<sub>cycl</sub>)</sub> C10-H14···O8 <sub>(C=O)</sub> & (CH)C11-H15···O6 <sub>(C=O)</sub><br>* <sub>(CH<sub>cycl</sub>)</sub> C10-H14···O8 <sub>(C=O)</sub> & (CH)C30-H45···O2 <sub>(C=O)</sub><br>* <sub>(CH)</sub> C11-H15···O6 <sub>(C=O)</sub> & (CH <sub>cycl</sub> )C20-H31···O2 <sub>(C=O)</sub><br>* <sub>(CH)</sub> C11-H15···O6 <sub>(C=O)</sub> & (CH <sub>cycl</sub> )C29-H44···O4 <sub>(C=O)</sub><br>* <sub>(CH<sub>cycl</sub>)</sub> C29-H44···O4 <sub>(C=O)</sub> & (CH)C30-H45···O2 <sub>(C=O)</sub> |
|  | C <sup>2</sup> <sub>2</sub> (12) | * <sub>(CH<sub>cycl</sub>)</sub> C1-H1···O8 <sub>(C=O)</sub> & (CH)C11-H15···O6 <sub>(C=O)</sub><br>* <sub>(CH<sub>cycl</sub>)</sub> C1-H1···O8 <sub>(C=O)</sub> & (CH)C30-H45···O2 <sub>(C=O)</sub><br>* <sub>(CH<sub>cycl</sub>)</sub> C10-H14···O8 <sub>(C=O)</sub> & (CH <sub>2cycl</sub> )C24-H38···O1 <sub>(C=O)</sub>                                                                                                                                                                                                                                                                                                                        |
|  | C <sup>2</sup> <sub>2</sub> (13) | (CH <sub>cycl</sub> )C1-H1···O8 <sub>(C=O)</sub> & (CH <sub>2cycl</sub> )C24-H38···O1 <sub>(C=O)</sub>                                                                                                                                                                                                                                                                                                                                                                                                                                                                                                                                              |
|  | C <sup>2</sup> <sub>2</sub> (14) | (CH <sub>cycl</sub> )C20-H31···O2 <sub>(C=O)</sub> & (CH <sub>2cycl</sub> )C24-H38···O1 <sub>(C=O)</sub>                                                                                                                                                                                                                                                                                                                                                                                                                                                                                                                                            |
|  | C <sup>2</sup> <sub>2</sub> (15) | (CH <sub>2cycl</sub> )C24-H38···O1 <sub>(C=O)</sub> & (CH <sub>cycl</sub> )C29-H44···O4 <sub>(C=O)</sub>                                                                                                                                                                                                                                                                                                                                                                                                                                                                                                                                            |
|  | C <sup>2</sup> <sub>2</sub> (17) | * <sub>(CH)</sub> C11-H15···O6 <sub>(C=O)</sub> & (CH <sub>2cycl</sub> )C24-H38···O1 <sub>(C=O)</sub><br>* <sub>(CH<sub>2cycl</sub>)</sub> C4-H38···O1 <sub>(C=O)</sub> & (CH)C30-H45···O2 <sub>(C=O)</sub>                                                                                                                                                                                                                                                                                                                                                                                                                                         |
|  | R <sup>1</sup> <sub>2</sub> (7)  | (CH <sub>cycl</sub> )C1-H1···O8 <sub>(C=O)</sub> & (CH <sub>cycl</sub> )C10-H14···O8 <sub>(C=O)</sub>                                                                                                                                                                                                                                                                                                                                                                                                                                                                                                                                               |
|  | R <sup>2</sup> <sub>2</sub> (8)  | * <sub>(CH)</sub> C11-H15···O6 <sub>(C=O)</sub> & (CH)C30-H45···O2 <sub>(C=O)</sub>                                                                                                                                                                                                                                                                                                                                                                                                                                                                                                                                                                 |
|  | R <sup>2</sup> <sub>2</sub> (12) | (CH <sub>cycl</sub> )C20-H31···O2 <sub>(C=O)</sub> & (CH <sub>cycl</sub> )C29-H44···O4 <sub>(C=O)</sub>                                                                                                                                                                                                                                                                                                                                                                                                                                                                                                                                             |
|  | D <sup>3</sup> <sub>3</sub> (15) | * <sub>(CH)</sub> C11-H15···O6 <sub>(C=O)</sub> & (CH <sub>3</sub> )C38-H59···O5 <sub>(C=O)</sub><br>* <sub>(CH<sub>cycl</sub>)</sub> C29-H44···O4 <sub>(C=O)</sub> <sub>2</sub> & (CH <sub>3</sub> )C38-H59···O5 <sub>(C=O)</sub><br>* <sub>(CH)</sub> C30-H45···O2 <sub>(C=O)</sub> <sub>2</sub> & (CH <sub>3</sub> )C38-H59···O5 <sub>(C=O)</sub>                                                                                                                                                                                                                                                                                                |
|  | D <sup>3</sup> <sub>3</sub> (17) | * <sub>(CH<sub>cycl</sub>)</sub> C1-H1···O8 <sub>(C=O)</sub> & (CH <sub>3</sub> )C38-H59···O5 <sub>(C=O)</sub><br>* <sub>(CH<sub>cycl</sub>)</sub> C10-H14···O8 <sub>(C=O)</sub> <sub>2</sub> & (CH <sub>3</sub> )C38-H59···O5 <sub>(C=O)</sub><br>* <sub>(CH<sub>cycl</sub>)</sub> C20-H31···O2 <sub>(C=O)</sub> <sub>2</sub> & (CH <sub>3</sub> )C38-H59···O5 <sub>(C=O)</sub>                                                                                                                                                                                                                                                                    |

**PERINDOPRIL structures**

|               |      |                                                                                                                                                                                                                                                                |
|---------------|------|----------------------------------------------------------------------------------------------------------------------------------------------------------------------------------------------------------------------------------------------------------------|
| <b>IVEGIA</b> | D(2) | * <sub>(NH<sub>3+</sub>)</sub> N5-H63···O5 <sub>(COO-)</sub><br>* <sub>(NH<sub>3+</sub>)</sub> N5-H64···O4 <sub>(COO-)</sub><br>* <sub>(NH<sub>3+</sub>)</sub> N5-H65···O10 <sub>(COO-)</sub><br>* <sub>(NH<sub>3+</sub>)</sub> N6-H78···O10 <sub>(COO-)</sub> |
|---------------|------|----------------------------------------------------------------------------------------------------------------------------------------------------------------------------------------------------------------------------------------------------------------|

|                |                                  |                                                                                                                                                                                                                                                                                                                                                                                                                                                                                                                                                                                                                                                                 |
|----------------|----------------------------------|-----------------------------------------------------------------------------------------------------------------------------------------------------------------------------------------------------------------------------------------------------------------------------------------------------------------------------------------------------------------------------------------------------------------------------------------------------------------------------------------------------------------------------------------------------------------------------------------------------------------------------------------------------------------|
|                |                                  | <p>*<sub>(NH3+)</sub>N6-H79...O9<sub>(COO-)</sub></p> <p>*<sub>(NH3+)</sub>N6-H80...O5<sub>(COO-)</sub></p> <p>*<sub>(CH2)</sub>C12-H18...O12<sub>(OH2)</sub></p> <p>*<sub>(CH2)</sub>C37-H59...O2<sub>(C=O)</sub></p>                                                                                                                                                                                                                                                                                                                                                                                                                                          |
|                | C(6)                             | <p>*<sub>(CH3)</sub>C19-H29...O2<sub>(C=O)</sub></p> <p>*<sub>(CH3)</sub>C38-H60...O7<sub>(C=O)</sub></p>                                                                                                                                                                                                                                                                                                                                                                                                                                                                                                                                                       |
|                | C(7)                             | (CH3)C16-H25...O3 <sub>(C-O-C)</sub>                                                                                                                                                                                                                                                                                                                                                                                                                                                                                                                                                                                                                            |
| <i>level 2</i> | C <sup>2</sup> <sub>2</sub> (6)  | <p>*<sub>(NH3+)</sub>N5-H63...O5<sub>(COO-)</sub> &amp; <sub>(NH3+)</sub>N5-H64...O4<sub>(COO-)</sub></p> <p>*<sub>(NH3+)</sub>N6-H78...O10<sub>(COO-)</sub> &amp; <sub>(NH3+)</sub>N6-H79...O9<sub>(COO-)</sub></p>                                                                                                                                                                                                                                                                                                                                                                                                                                            |
|                | C <sup>2</sup> <sub>2</sub> (13) | (CH3)C16-H25...O3 <sub>(C-O-C)</sub> & (CH3)C19-H29...O2 <sub>(C=O)</sub>                                                                                                                                                                                                                                                                                                                                                                                                                                                                                                                                                                                       |
|                | R <sup>2</sup> <sub>2</sub> (11) | (CH3)C16-H25...O3 <sub>(C-O-C)</sub> & (CH3)C19-H29...O2 <sub>(C=O)</sub>                                                                                                                                                                                                                                                                                                                                                                                                                                                                                                                                                                                       |
|                | D <sup>1</sup> <sub>2</sub> (3)  | <p>*<sub>(NH3+)</sub>N5-H63...O5<sub>(COO-)</sub> &amp; <sub>(NH3+)</sub>N6-H80...O5<sub>(COO-)</sub></p> <p>*<sub>(NH3+)</sub>N5-H65...O10<sub>(COO-)</sub> &amp; <sub>(NH3+)</sub>N6-H78...O10<sub>(COO-)</sub></p>                                                                                                                                                                                                                                                                                                                                                                                                                                           |
|                | D <sup>2</sup> <sub>2</sub> (5)  | <p>*<sub>(NH3+)</sub>N5-H63...O5<sub>(COO-)</sub> &amp; <sub>(NH3+)</sub>N5-H65...O10<sub>(COO-)</sub></p> <p>*<sub>(NH3+)</sub>N5-H64...O4<sub>(COO-)</sub> &amp; <sub>(NH3+)</sub>N5-H65...O10<sub>(COO-)</sub></p> <p>*<sub>(NH3+)</sub>N5-H64...O4<sub>(COO-)</sub> &amp; <sub>(NH3+)</sub>N6-H80...O5<sub>(COO-)</sub></p> <p>*<sub>(NH3+)</sub>N5-H65...O10<sub>(COO-)</sub> &amp; <sub>(NH3+)</sub>N6-H79...O9<sub>(COO-)</sub></p> <p>*<sub>(NH3+)</sub>N6-H78...O10<sub>(COO-)</sub> &amp; <sub>(NH3+)</sub>N6-H80...O5<sub>(COO-)</sub></p> <p>*<sub>(NH3+)</sub>N6-H79...O9<sub>(COO-)</sub> &amp; <sub>(NH3+)</sub>N6-H80...O5<sub>(COO-)</sub></p> |
|                | D <sup>2</sup> <sub>2</sub> (7)  | (CH2)C12-H18...O12 <sub>(OH2)</sub> & (CH2)C37-H59...O2 <sub>(C=O)</sub>                                                                                                                                                                                                                                                                                                                                                                                                                                                                                                                                                                                        |
|                | D <sup>2</sup> <sub>2</sub> (12) | <p>*<sub>(NH3+)</sub>N5-H63...O5<sub>(COO-)</sub> &amp; (CH2)C12-H18...O12<sub>(OH2)</sub></p> <p>*<sub>(NH3+)</sub>N5-H64...O4<sub>(COO-)</sub> &amp; (CH2)C12-H18...O12<sub>(OH2)</sub></p> <p>*<sub>(NH3+)</sub>N5-H63...O5<sub>(COO-)</sub> &amp; (CH2)C37-H59...O2<sub>(C=O)</sub></p> <p>*<sub>(NH3+)</sub>N5-H64...O4<sub>(COO-)</sub> &amp; (CH2)C37-H59...O2<sub>(C=O)</sub></p> <p>*<sub>(NH3+)</sub>N6-H80...O5<sub>(COO-)</sub> &amp; (CH2)C12-H18...O12<sub>(OH2)</sub></p> <p>*<sub>(NH3+)</sub>N6-H80...O5<sub>(COO-)</sub> &amp; (CH2)C37-H59...O2<sub>(C=O)</sub></p>                                                                          |
|                | D <sup>2</sup> <sub>2</sub> (14) | <p><sub>(NH3+)</sub>N5-H65...O10<sub>(COO-)</sub> &amp; (CH2)C37-H59...O2<sub>(C=O)</sub></p> <p>*<sub>(NH3+)</sub>N6-H78...O10<sub>(COO-)</sub> &amp; (CH2)C37-H59...O2<sub>(C=O)</sub></p> <p>*<sub>(NH3+)</sub>N6-H79...O9<sub>(COO-)</sub> &amp; (CH2)C37-H59...O2<sub>(C=O)</sub></p>                                                                                                                                                                                                                                                                                                                                                                      |
|                | D <sup>2</sup> <sub>3</sub> (9)  | (CH3)C19-H29...O2 <sub>(C=O)</sub> & (CH2)C37-H59...O2 <sub>(C=O)</sub> <sub>2</sub>                                                                                                                                                                                                                                                                                                                                                                                                                                                                                                                                                                            |
|                | D <sup>3</sup> <sub>3</sub> (11) | ((CH2)C37-H59...O2 <sub>(C=O)</sub> ) <sub>2</sub> & (CH3)C38-H60...O7 <sub>(C=O)</sub>                                                                                                                                                                                                                                                                                                                                                                                                                                                                                                                                                                         |
|                | D <sup>3</sup> <sub>3</sub> (12) | (CH3)C16-H25...O3 <sub>(C-O-C)</sub> & (CH2)C37-H59...O2 <sub>(C=O)</sub> <sub>2</sub>                                                                                                                                                                                                                                                                                                                                                                                                                                                                                                                                                                          |
|                | D <sup>3</sup> <sub>3</sub> (14) | ((CH2)C12-H18...O12 <sub>(OH2)</sub> ) <sub>2</sub> & (CH3)C16-H25...O3 <sub>(C-O-C)</sub>                                                                                                                                                                                                                                                                                                                                                                                                                                                                                                                                                                      |
|                | D <sup>3</sup> <sub>3</sub> (15) | (CH2)C12-H18...O12 <sub>(OH2)</sub> <sub>2</sub> & (CH3)C19-H29...O2 <sub>(C=O)</sub>                                                                                                                                                                                                                                                                                                                                                                                                                                                                                                                                                                           |
|                | D <sup>3</sup> <sub>3</sub> (20) | <p>*<sub>(NH3+)</sub>N5-H63...O5<sub>(COO-)</sub><sub>2</sub> &amp; (CH3)C16-H25...O3<sub>(C-O-C)</sub></p> <p>*<sub>(NH3+)</sub>N5-H64...O4<sub>(COO-)</sub><sub>2</sub> &amp; (CH3)C16-H25...O3<sub>(C-O-C)</sub></p> <p>*<sub>(NH3+)</sub>N6-H80...O5<sub>(COO-)</sub><sub>2</sub> &amp; (CH3)C16-H25...O3<sub>(C-O-C)</sub></p>                                                                                                                                                                                                                                                                                                                             |

|                 |             |                                                                                                                                                                        |
|-----------------|-------------|------------------------------------------------------------------------------------------------------------------------------------------------------------------------|
| <b>UZOVAH03</b> | $C(7)$      | $(CH_3)C26-H48 \cdots O3_{(C-O-C)}$                                                                                                                                    |
|                 | $R^2_2(12)$ | $(CH_{cycl})C8-H6 \cdots O6_{(C-O-C)}$                                                                                                                                 |
|                 | $D(2)$      | * $_{(NH_3^+)}N3-H32 \cdots O4_{(COO-)}$<br>* $_{(NH_3^+)}N3-H33 \cdots O5_{(COO-)}$<br>* $_{(NH_3^+)}N3-H34 \cdots O5_{(COO-)}$                                       |
| <i>level 2</i>  | $C^1_2(4)$  | $_{(NH_3^+)}N3-H33 \cdots O5_{(COO-)}$ & $_{(NH_3^+)}N3-H34 \cdots O5_{(COO-)}$                                                                                        |
|                 | $C^2_2(6)$  | * $_{(NH_3^+)}N3-H32 \cdots O4_{(COO-)}$ & $_{(NH_3^+)}N3-H33 \cdots O5_{(COO-)}$<br>* $_{(NH_3^+)}N3-H32 \cdots O4_{(COO-)}$ & $_{(NH_3^+)}N3-H34 \cdots O5_{(COO-)}$ |

### Proline-based ACE1

|                |             |                                                                                                                                                                                                                                                                                                                                                                |
|----------------|-------------|----------------------------------------------------------------------------------------------------------------------------------------------------------------------------------------------------------------------------------------------------------------------------------------------------------------------------------------------------------------|
| <b>CIYNIH</b>  | $D(2)$      | * $_{(OH_2)}O6-H25 \cdots O3_{(C=O)}$<br>* $_{(OH_2)}O6-H26 \cdots O7_{(OH_2)}$<br>* $_{(OH_2)}O7-H28 \cdots O5_{(COO-)}$<br>* $_{(NH_2^+)}N2-H3 \cdots O6_{(OH_2)}$<br>* $_{(CH_2)}C11-H16 \cdots O6_{(OH_2)}$<br>* $_{(CH_2)}C12-H19 \cdots O6_{(OH_2)}$                                                                                                     |
|                | $C(5)$      | $_{(NH_2^+)}N2-H3 \cdots O6_{(OH_2)}$                                                                                                                                                                                                                                                                                                                          |
|                | $C(9)$      | $(CH_{cycl})C15-H21 \cdots O5_{(COO-)}$                                                                                                                                                                                                                                                                                                                        |
|                | $C(11)$     | $(OH_{COOH})O2-H6 \cdots O5_{(COO-)}$                                                                                                                                                                                                                                                                                                                          |
|                | $C(14)$     | $(CH_{cycl})C17-H23 \cdots O2_{(OH_{COOH})}$                                                                                                                                                                                                                                                                                                                   |
| <i>level 2</i> | $C^1_2(5)$  | $(CH_2)C11-H16 \cdots O6_{(OH_2)}$ & $(CH_2)C12-H19 \cdots O6_{(OH_2)}$                                                                                                                                                                                                                                                                                        |
|                | $C^1_2(6)$  | * $_{(NH_2^+)}N2-H3 \cdots O6_{(OH_2)}$ & $(CH_2)C11-H16 \cdots O6_{(OH_2)}$                                                                                                                                                                                                                                                                                   |
|                | $C^1_2(16)$ | $(OH_{COOH})O2-H6 \cdots O5_{(COO-)}$ & $(CH_{cycl})C15-H21 \cdots O5_{(COO-)}$                                                                                                                                                                                                                                                                                |
|                | $C^2_2(7)$  | $(NH_2^+)N2-H3 \cdots O6_{(OH_2)}$ & $(OH_2)O6-H25 \cdots O3_{(C=O)}$                                                                                                                                                                                                                                                                                          |
|                | $C^2_2(10)$ | $(OH_2)O6-H25 \cdots O3_{(C=O)}$ & $(CH_2)C12-H19 \cdots O6_{(OH_2)}$                                                                                                                                                                                                                                                                                          |
|                | $C^2_2(11)$ | $(OH_{COOH})O2-H6 \cdots O5_{(COO-)}$ & $(CH_{cycl})C17-H23 \cdots O2_{(OH_{COOH})}$                                                                                                                                                                                                                                                                           |
|                | $C^2_2(12)$ | * $_{(OH_{COOH})}O2-H6 \cdots O5_{(COO-)}$ & $(NH_2^+)N2-H4 \cdots O4_{(COO-)}$<br>* $_{(NH_2^+)}N2-H4 \cdots O4_{(COO-)}$ & $(CH_{cycl})C15-H21 \cdots O5_{(COO-)}$                                                                                                                                                                                           |
|                | $C^2_2(14)$ | $(NH_2^+)N2-H4 \cdots O4_{(COO-)}$ & $(CH_{cycl})C15-H21 \cdots O5_{(COO-)}$                                                                                                                                                                                                                                                                                   |
|                | $C^2_2(15)$ | $(CH_{cycl})C15-H21 \cdots O5_{(COO-)}$ & $(CH_{cycl})C17-H23 \cdots O2_{(OH_{COOH})}$                                                                                                                                                                                                                                                                         |
|                | $C^2_2(16)$ | $(OH_{COOH})O2-H6 \cdots O5_{(COO-)}$ & $(NH_2^+)N2-H4 \cdots O4_{(COO-)}$                                                                                                                                                                                                                                                                                     |
|                | $C^2_2(17)$ | $(NH_2^+)N2-H4 \cdots O4_{(COO-)}$ & $(CH_{cycl})C17-H23 \cdots O2_{(OH_{COOH})}$                                                                                                                                                                                                                                                                              |
|                | $C^2_2(19)$ | $(NH_2^+)N2-H4 \cdots O4_{(COO-)}$ & $(CH_{cycl})C17-H23 \cdots O2_{(OH_{COOH})}$                                                                                                                                                                                                                                                                              |
|                | $C^2_2(20)$ | $(OH_{COOH})O2-H6 \cdots O5_{(COO-)}$ & $(CH_{cycl})C15-H21 \cdots O5_{(COO-)}$                                                                                                                                                                                                                                                                                |
|                | $R^1_2(7)$  | $(NH_2^+)N2-H3 \cdots O6_{(OH_2)}$ & $(CH_2)C12-H19 \cdots O6_{(OH_2)}$                                                                                                                                                                                                                                                                                        |
|                | $R^2_2(9)$  | $(OH_2)O6-H25 \cdots O3_{(C=O)}$ & $(CH_2)C11-H16 \cdots O6_{(OH_2)}$                                                                                                                                                                                                                                                                                          |
|                | $D^2_2(4)$  | * $_{(OH_2)}O6-H26 \cdots O7_{(OH_2)}$ & $(NH_2^+)N2-H3 \cdots O6_{(OH_2)}$<br>* $_{(OH_2)}O6-H26 \cdots O7_{(OH_2)}$ & $(CH_2)C11-H16 \cdots O6_{(OH_2)}$<br>* $_{(OH_2)}O6-H26 \cdots O7_{(OH_2)}$ & $(CH_2)C12-H19 \cdots O6_{(OH_2)}$<br>* $_{(OH_2)}O7-H28 \cdots O5_{(COO-)}$ & $(OH_2)O6-H27 \cdots O7_{(OH_2)}$                                        |
|                | $D^2_2(5)$  | $(OH_2)O6-H25 \cdots O3_{(C=O)}$ & $(OH_2)O6-H26 \cdots O7_{(OH_2)}$                                                                                                                                                                                                                                                                                           |
|                | $D^2_2(7)$  | * $_{(OH_2)}O7-H28 \cdots O5_{(COO-)}$ & $(NH_2^+)N2-H3 \cdots O6_{(OH_2)}$<br>* $_{(OH_2)}O7-H28 \cdots O5_{(COO-)}$ & $(CH_2)C11-H16 \cdots O6_{(OH_2)}$                                                                                                                                                                                                     |
|                | $D^2_2(8)$  | $(OH_2)O7-H28 \cdots O5_{(COO-)}$ & $(CH_2)C12-H19 \cdots O6_{(OH_2)}$                                                                                                                                                                                                                                                                                         |
|                | $D^2_2(9)$  | $(OH_2)O7-H28 \cdots O5_{(COO-)}$ & $(OH_2)O6-H25 \cdots O3_{(C=O)}$                                                                                                                                                                                                                                                                                           |
|                | $D^2_3(14)$ | $(OH_{COOH})O2-H6 \cdots O5_{(COO-)}$ & $(OH_2)O7-H28 \cdots O5_{(COO-)}$                                                                                                                                                                                                                                                                                      |
|                | $D^3_3(10)$ | $(OH_2)O7-H28 \cdots O5_{(COO-)}$ <sub>2</sub> & $(NH_2^+)N2-H4 \cdots O4_{(COO-)}$                                                                                                                                                                                                                                                                            |
|                | $D^3_3(12)$ | * $_{(OH_2)}O7-H28 \cdots O5_{(COO-)}$ & $(CH_{cycl})C15-H21 \cdots O5_{(COO-)}$<br>* $_{(NH_2^+)}N2-H4 \cdots O4_{(COO-)}$ & $(CH_2)C11-H16 \cdots O6_{(OH_2)}$                                                                                                                                                                                               |
|                | $D^3_3(14)$ | * $_{(NH_2^+)}N2-H4 \cdots O4_{(COO-)}$ & $(CH_2)C12-H19 \cdots O6_{(OH_2)}$<br>* $_{(OH_2)}O6-H25 \cdots O3_{(C=O)}$ & $(NH_2^+)N2-H4 \cdots O4_{(COO-)}$<br>* $_{(CH_2)}C11-H16 \cdots O6_{(OH_2)}$ <sub>2</sub> & $(CH_{cycl})C15-H21 \cdots O5_{(COO-)}$<br>* $_{(CH_2)}C12-H19 \cdots O6_{(OH_2)}$ <sub>2</sub> & $(CH_{cycl})C15-H21 \cdots O5_{(COO-)}$ |



|                 |             |                                                                                                                                                                                                                                                                                                                                                                                                                                                                                                                                                                                                                                                                                                                                                                                                                                                                                                                                                                                                                                                                                                                                                                                                                                                                              |
|-----------------|-------------|------------------------------------------------------------------------------------------------------------------------------------------------------------------------------------------------------------------------------------------------------------------------------------------------------------------------------------------------------------------------------------------------------------------------------------------------------------------------------------------------------------------------------------------------------------------------------------------------------------------------------------------------------------------------------------------------------------------------------------------------------------------------------------------------------------------------------------------------------------------------------------------------------------------------------------------------------------------------------------------------------------------------------------------------------------------------------------------------------------------------------------------------------------------------------------------------------------------------------------------------------------------------------|
|                 | $D_3^3(16)$ | <p>*<sub>(OH,COOH)</sub> <b>O2-H6</b>···<b>O5</b><sub>(COO-)</sub> &amp; <sub>(NH2+)</sub> <b>N2-H3</b>···<b>O6</b><sub>(OH2)</sub><sub>2</sub></p> <p>*<sub>(OH,COOH)</sub> <b>O2-H6</b>···<b>O5</b><sub>(COO-)</sub> &amp; <sub>(OH2)</sub> <b>O6-H25</b>···<b>O3</b><sub>(C=O)</sub><sub>2</sub></p> <p>*<sub>(NH2+)</sub> <b>N2-H3</b>···<b>O6</b><sub>(OH2)</sub><sub>2</sub> &amp; <sub>(CHcycl)</sub> <b>C15-H21</b>···<b>O5</b><sub>(COO-)</sub></p> <p>*<sub>(NH2+)</sub> <b>N2-H3</b>···<b>O6</b><sub>(OH2)</sub><sub>2</sub> &amp; <sub>(CHcycl)</sub> <b>C17-H23</b>···<b>O2</b><sub>(OH,COOH)</sub></p>                                                                                                                                                                                                                                                                                                                                                                                                                                                                                                                                                                                                                                                         |
|                 | $D_3^3(18)$ | <sub>(OH,COOH)</sub> <b>O2-H6</b> ··· <b>O5</b> <sub>(COO-)</sub> & <sub>(CH2)</sub> <b>C11-H16</b> ··· <b>O6</b> <sub>(OH2)</sub> <sub>2</sub>                                                                                                                                                                                                                                                                                                                                                                                                                                                                                                                                                                                                                                                                                                                                                                                                                                                                                                                                                                                                                                                                                                                              |
|                 | $D_3^3(19)$ | <p>*<sub>(OH2)</sub> <b>O6-H25</b>···<b>O3</b><sub>(C=O)</sub><sub>2</sub> &amp; <sub>(CHcycl)</sub> <b>C17-H23</b>···<b>O2</b><sub>(OH,COOH)</sub></p> <p>*<sub>(CH2)</sub> <b>C11-H16</b>···<b>O6</b><sub>(OH2)</sub> &amp; <sub>(CHcycl)</sub> <b>C17-H23</b>···<b>O2</b><sub>(OH,COOH)</sub></p> <p>*<sub>(CH2)</sub> <b>C12-H19</b>···<b>O6</b><sub>(OH2)</sub><sub>2</sub> &amp; <sub>(CHcycl)</sub> <b>C17-H23</b>···<b>O2</b><sub>(OH,COOH)</sub></p>                                                                                                                                                                                                                                                                                                                                                                                                                                                                                                                                                                                                                                                                                                                                                                                                                |
|                 | $D_3^3(20)$ | <p>*<sub>(OH,COOH)</sub> <b>O2-H6</b>···<b>O5</b><sub>(COO-)</sub> &amp; <sub>(CH2)</sub> <b>C12-H19</b>···<b>O6</b><sub>(OH2)</sub><sub>2</sub></p> <p>*<sub>(OH2)</sub> <b>O6-H25</b>···<b>O3</b><sub>(C=O)</sub><sub>2</sub> &amp; <sub>(CHcycl)</sub> <b>C15-H21</b>···<b>O5</b><sub>(COO-)</sub></p>                                                                                                                                                                                                                                                                                                                                                                                                                                                                                                                                                                                                                                                                                                                                                                                                                                                                                                                                                                    |
| <b>DIVHOF01</b> | $C(5)$      | <p>*<sub>(CH2)</sub> <b>C5-H16</b>···<b>O1</b><sub>(C=O)</sub></p> <p>*<sub>(CH2cycl)</sub> <b>C20-H14</b>···<b>O3</b><sub>(C=O)</sub></p> <p>*<sub>(CH)</sub> <b>C21-H26</b>···<b>O8</b><sub>(COO-)</sub></p>                                                                                                                                                                                                                                                                                                                                                                                                                                                                                                                                                                                                                                                                                                                                                                                                                                                                                                                                                                                                                                                               |
|                 | $C(6)$      | <sub>(CH2cycl)</sub> <b>C19-H12</b> ··· <b>O3</b> <sub>(C=O)</sub>                                                                                                                                                                                                                                                                                                                                                                                                                                                                                                                                                                                                                                                                                                                                                                                                                                                                                                                                                                                                                                                                                                                                                                                                           |
|                 | $C(8)$      | <sub>(NH2+)</sub> <b>N1-H7</b> ··· <b>O5</b> <sub>(COO-)</sub>                                                                                                                                                                                                                                                                                                                                                                                                                                                                                                                                                                                                                                                                                                                                                                                                                                                                                                                                                                                                                                                                                                                                                                                                               |
|                 | $D(2)$      | <p>*<sub>(NH2+)</sub> <b>N1-H6</b>···<b>O7</b><sub>(COO-)</sub></p> <p>*<sub>(CH2)</sub> <b>C2-H20</b>···<b>O9</b><sub>(COO-)</sub></p> <p>*<sub>(CH)</sub> <b>C4-H15</b>···<b>O9</b><sub>(COO-)</sub></p> <p>*<sub>(CH2)</sub> <b>C6-H19</b>···<b>O6</b><sub>(COO-)</sub></p> <p>*<sub>(CH2)</sub> <b>C6-H19</b>···<b>O7</b><sub>(COO-)</sub></p> <p>*<sub>(CH3)</sub> <b>C15-H23</b>···<b>O9</b><sub>(COO-)</sub></p> <p>*<sub>(CH2cycl)</sub> <b>C19-H11</b>···<b>O8</b><sub>(COO-)</sub></p> <p>*<sub>(CH)</sub> <b>C23-H27</b>···<b>O2</b><sub>(C-O-C)</sub></p>                                                                                                                                                                                                                                                                                                                                                                                                                                                                                                                                                                                                                                                                                                        |
| <i>level 2</i>  | $C_2^1(7)$  | <p>*<sub>(CH)</sub> <b>C4-H15</b>···<b>O9</b><sub>(COO-)</sub></p> <p>*<sub>(CH2cycl)</sub> <b>C20-H20</b>···<b>O9</b><sub>(COO-)</sub></p>                                                                                                                                                                                                                                                                                                                                                                                                                                                                                                                                                                                                                                                                                                                                                                                                                                                                                                                                                                                                                                                                                                                                  |
|                 | $C_2^1(10)$ | <p>*<sub>(NH2+)</sub> <b>N1-H6</b>···<b>O7</b><sub>(COO-)</sub> &amp; <sub>(CH)</sub> <b>C4-H15</b>···<b>O9</b><sub>(COO-)</sub></p> <p>*<sub>(CH2)</sub> <b>C2-H20</b>···<b>O9</b><sub>(COO-)</sub><sub>2</sub> &amp; <sub>(CH3)</sub> <b>C15-H23</b>···<b>O9</b><sub>(COO-)</sub></p>                                                                                                                                                                                                                                                                                                                                                                                                                                                                                                                                                                                                                                                                                                                                                                                                                                                                                                                                                                                      |
|                 | $C_2^2(7)$  | <sub>(CH2)</sub> <b>C2-H20</b> ··· <b>O9</b> <sub>(COO-)</sub> & <sub>(CH)</sub> <b>C23-H27</b> ··· <b>O2</b> <sub>(C-O-C)</sub>                                                                                                                                                                                                                                                                                                                                                                                                                                                                                                                                                                                                                                                                                                                                                                                                                                                                                                                                                                                                                                                                                                                                             |
|                 | $C_2^2(10)$ | <sub>(NH2+)</sub> <b>N1-H6</b> ··· <b>O7</b> <sub>(COO-)</sub> & <sub>(CH)</sub> <b>C23-H27</b> ··· <b>O2</b> <sub>(C-O-C)</sub>                                                                                                                                                                                                                                                                                                                                                                                                                                                                                                                                                                                                                                                                                                                                                                                                                                                                                                                                                                                                                                                                                                                                             |
|                 | $C_2^2(11)$ | <p>*<sub>(NH2+)</sub> <b>N1-H6</b>···<b>O7</b><sub>(COO-)</sub> &amp; <sub>(CH3)</sub> <b>C15-H23</b>···<b>O9</b><sub>(COO-)</sub></p> <p>*<sub>(NH2+)</sub> <b>N1-H7</b>···<b>O5</b><sub>(COO-)</sub> &amp; <sub>(CH2cycl)</sub> <b>C19-H12</b>···<b>O3</b><sub>(C=O)</sub></p> <p>*<sub>(NH2+)</sub> <b>N1-H7</b>···<b>O5</b><sub>(COO-)</sub> &amp; <sub>(CH2cycl)</sub> <b>C20-H14</b>···<b>O3</b><sub>(C=O)</sub></p> <p>*<sub>(CH)</sub> <b>C4-H15</b>···<b>O9</b><sub>(COO-)</sub> &amp; <sub>(CH2)</sub> <b>C6-H19</b>···<b>O6</b><sub>(COO-)</sub></p> <p>*<sub>(CH)</sub> <b>C4-H15</b>···<b>O9</b><sub>(COO-)</sub> &amp; <sub>(CH2)</sub> <b>C6-H19</b>···<b>O7</b><sub>(COO-)</sub></p> <p>*<sub>(CH2)</sub> <b>C6-H19</b>···<b>O6</b><sub>(COO-)</sub> &amp; <sub>(CH)</sub> <b>C23-H27</b>···<b>O2</b><sub>(C-O-C)</sub></p> <p>*<sub>(CH2)</sub> <b>C6-H19</b>···<b>O7</b><sub>(COO-)</sub> &amp; <sub>(CH)</sub> <b>C23-H27</b>···<b>O2</b><sub>(C-O-C)</sub></p> <p>*<sub>(CH3)</sub> <b>C15-H23</b>···<b>O9</b><sub>(COO-)</sub> &amp; <sub>(CH2cycl)</sub> <b>C19-H11</b>···<b>O8</b><sub>(COO-)</sub></p> <p>*<sub>(CH2cycl)</sub> <b>C19-H12</b>···<b>O3</b><sub>(C=O)</sub> &amp; <sub>(CH2cycl)</sub> <b>C20-H14</b>···<b>O3</b><sub>(C=O)</sub></p> |
|                 | $C_2^2(12)$ | <sub>(CH)</sub> <b>C4-H15</b> ··· <b>O9</b> <sub>(COO-)</sub> & <sub>(CH2cycl)</sub> <b>C19-H11</b> ··· <b>O8</b> <sub>(COO-)</sub>                                                                                                                                                                                                                                                                                                                                                                                                                                                                                                                                                                                                                                                                                                                                                                                                                                                                                                                                                                                                                                                                                                                                          |
|                 | $C_2^2(13)$ | <p>*<sub>(NH2+)</sub> <b>N1-H6</b>···<b>O7</b><sub>(COO-)</sub> &amp; <sub>(CH2)</sub> <b>C2-H20</b>···<b>O9</b><sub>(COO-)</sub></p> <p>*<sub>(NH2+)</sub> <b>N1-H7</b>···<b>O5</b><sub>(COO-)</sub> &amp; <sub>(CH2cycl)</sub> <b>C20-H14</b>···<b>O3</b><sub>(C=O)</sub></p>                                                                                                                                                                                                                                                                                                                                                                                                                                                                                                                                                                                                                                                                                                                                                                                                                                                                                                                                                                                              |
|                 | $C_2^2(14)$ | <p>*<sub>(NH2+)</sub> <b>N1-H7</b>···<b>O5</b><sub>(COO-)</sub> &amp; <sub>(CH2cycl)</sub> <b>C19-H12</b>···<b>O3</b><sub>(C=O)</sub></p> <p>*<sub>(CH2)</sub> <b>C2-H20</b>···<b>O9</b><sub>(COO-)</sub> &amp; <sub>(CH2)</sub> <b>C6-H19</b>···<b>O6</b><sub>(COO-)</sub></p> <p>*<sub>(CH2)</sub> <b>C2-H20</b>···<b>O9</b><sub>(COO-)</sub> &amp; <sub>(CH2)</sub> <b>C6-H19</b>···<b>O7</b><sub>(COO-)</sub></p> <p>*<sub>(CH2)</sub> <b>C5-H23</b>···<b>O9</b><sub>(COO-)</sub> &amp; <sub>(CH2)</sub> <b>C16-H19</b>···<b>O7</b><sub>(COO-)</sub></p> <p>*<sub>(CH2)</sub> <b>C6-H19</b>···<b>O7</b><sub>(COO-)</sub><sub>2</sub> &amp; <sub>(CH3)</sub> <b>C15-H23</b>···<b>O9</b><sub>(COO-)</sub></p> <p>*<sub>(CH2cycl)</sub> <b>C19-H11</b>···<b>O8</b><sub>(COO-)</sub> &amp; <b>C23-H27</b>···<b>O2</b><sub>(C-O-C)</sub></p>                                                                                                                                                                                                                                                                                                                                                                                                                                  |
|                 | $C_2^2(15)$ | <p>*<sub>(NH2+)(NH2+)</sub> <b>N1-H7</b>···<b>O5</b><sub>(COO-)</sub> &amp; <sub>(CH2)</sub> <b>C5-H16</b>···<b>O1</b><sub>(C=O)</sub></p> <p>*<sub>(CH2)</sub> <b>C2-H20</b>···<b>O9</b><sub>(COO-)</sub> &amp; <sub>(CH2cycl)</sub> <b>C19-H11</b>···<b>O8</b><sub>(COO-)</sub></p>                                                                                                                                                                                                                                                                                                                                                                                                                                                                                                                                                                                                                                                                                                                                                                                                                                                                                                                                                                                        |
|                 | $C_2^2(16)$ | <sub>(CH2)</sub> <b>C5-H16</b> ··· <b>O1</b> <sub>(C=O)</sub> & <sub>(CH2cycl)</sub> <b>C20-H14</b> ··· <b>O3</b> <sub>(C=O)</sub>                                                                                                                                                                                                                                                                                                                                                                                                                                                                                                                                                                                                                                                                                                                                                                                                                                                                                                                                                                                                                                                                                                                                           |
|                 | $C_2^2(17)$ | <sub>(CH2)</sub> <b>C5-H16</b> ··· <b>O1</b> <sub>(C=O)</sub> & <sub>(CH2cycl)</sub> <b>C19-H12</b> ··· <b>O3</b> <sub>(C=O)</sub>                                                                                                                                                                                                                                                                                                                                                                                                                                                                                                                                                                                                                                                                                                                                                                                                                                                                                                                                                                                                                                                                                                                                           |
|                 | $R_2^1(5)$  | <sub>(CH2cycl)</sub> <b>C19-H12</b> ··· <b>O3</b> <sub>(C=O)</sub> & <sub>(CH2cycl)</sub> <b>C20-H14</b> ··· <b>O3</b> <sub>(C=O)</sub>                                                                                                                                                                                                                                                                                                                                                                                                                                                                                                                                                                                                                                                                                                                                                                                                                                                                                                                                                                                                                                                                                                                                      |
|                 | $R_2^1(7)$  | <p>*<sub>(NH2+)</sub> <b>N1-H6</b>···<b>O7</b><sub>(COO-)</sub> &amp; <sub>(CH2)</sub> <b>C6-H19</b>···<b>O7</b><sub>(COO-)</sub></p> <p>*<sub>(CH)</sub> <b>C4-H15</b>···<b>O9</b><sub>(COO-)</sub> &amp; <sub>(CH3)</sub> <b>C15-H23</b>···<b>O9</b><sub>(COO-)</sub></p>                                                                                                                                                                                                                                                                                                                                                                                                                                                                                                                                                                                                                                                                                                                                                                                                                                                                                                                                                                                                  |
|                 | $R_2^2(4)$  | <sub>(CH2)</sub> <b>C6-H19</b> ··· <b>O6</b> <sub>(COO-)</sub> & <sub>(CH2)</sub> <b>C6-H19</b> ··· <b>O7</b> <sub>(COO-)</sub>                                                                                                                                                                                                                                                                                                                                                                                                                                                                                                                                                                                                                                                                                                                                                                                                                                                                                                                                                                                                                                                                                                                                              |
|                 | $R_2^2(8)$  | * <sub>(CH)</sub> <b>C4-H15</b> ··· <b>O9</b> <sub>(COO-)</sub> <sub>2</sub> & <sub>(CH)</sub> <b>C23-H27</b> ··· <b>O2</b> <sub>(C-O-C)</sub>                                                                                                                                                                                                                                                                                                                                                                                                                                                                                                                                                                                                                                                                                                                                                                                                                                                                                                                                                                                                                                                                                                                               |
|                 | $R_2^2(9)$  | <sub>(NH2+)</sub> <b>N1-H6</b> ··· <b>O7</b> <sub>(COO-)</sub> & <sub>(CH2)</sub> <b>C6-H19</b> ··· <b>O6</b> <sub>(COO-)</sub> <sub>2</sub>                                                                                                                                                                                                                                                                                                                                                                                                                                                                                                                                                                                                                                                                                                                                                                                                                                                                                                                                                                                                                                                                                                                                 |
|                 | $R_2^2(11)$ | <sub>(CH3)</sub> <b>C15-H23</b> ··· <b>O9</b> <sub>(COO-)</sub> & <sub>(CH)</sub> <b>C23-H27</b> ··· <b>O2</b> <sub>(C-O-C)</sub>                                                                                                                                                                                                                                                                                                                                                                                                                                                                                                                                                                                                                                                                                                                                                                                                                                                                                                                                                                                                                                                                                                                                            |
|                 | $R_2^2(14)$ | <sub>(NH2+)</sub> <b>N1-H6</b> ··· <b>O7</b> <sub>(COO-)</sub> & <sub>(CH2cycl)</sub> <b>C19-H11</b> ··· <b>O8</b> <sub>(COO-)</sub>                                                                                                                                                                                                                                                                                                                                                                                                                                                                                                                                                                                                                                                                                                                                                                                                                                                                                                                                                                                                                                                                                                                                         |
|                 | $R_2^2(16)$ | <sub>(CH2)</sub> <b>C5-H16</b> ··· <b>O1</b> <sub>(C=O)</sub> & <sub>(CH2cycl)</sub> <b>C20-H14</b> ··· <b>O3</b> <sub>(C=O)</sub>                                                                                                                                                                                                                                                                                                                                                                                                                                                                                                                                                                                                                                                                                                                                                                                                                                                                                                                                                                                                                                                                                                                                           |
|                 | $R_2^2(17)$ | <p>*<sub>(CH2)</sub> <b>C5-H16</b>···<b>O1</b><sub>(C=O)</sub> &amp; <sub>(CH2cycl)</sub> <b>C19-H12</b>···<b>O3</b><sub>(C=O)</sub></p> <p>*<sub>(CH2)</sub> <b>C6-H19</b>···<b>O7</b><sub>(COO-)</sub> &amp; <sub>(CH2cycl)</sub> <b>C19-H11</b>···<b>O8</b><sub>(COO-)</sub></p>                                                                                                                                                                                                                                                                                                                                                                                                                                                                                                                                                                                                                                                                                                                                                                                                                                                                                                                                                                                          |

|                 |              |                                                                                                                                                                                                                                                                                                                                                                                                                                                                                                                                                                                                                                                                                                                                                                                                                                                                                                                                                        |
|-----------------|--------------|--------------------------------------------------------------------------------------------------------------------------------------------------------------------------------------------------------------------------------------------------------------------------------------------------------------------------------------------------------------------------------------------------------------------------------------------------------------------------------------------------------------------------------------------------------------------------------------------------------------------------------------------------------------------------------------------------------------------------------------------------------------------------------------------------------------------------------------------------------------------------------------------------------------------------------------------------------|
|                 | $R_3^3(19)$  | * $(\text{NH}_2^+)$ <b>N1-H7</b> ··· <b>O5</b> $(\text{COO-})_2$ & $(\text{CH}_2\text{cycl})$ <b>C19-H12</b> ··· <b>O3</b> $(\text{C=O})$<br>* $(\text{NH}_2^+)$ <b>N1-H7</b> ··· <b>O5</b> $(\text{COO-})_2$ & $(\text{CH}_2\text{cycl})$ <b>C20-H14</b> ··· <b>O3</b> $(\text{C=O})$                                                                                                                                                                                                                                                                                                                                                                                                                                                                                                                                                                                                                                                                 |
|                 | $D_3^2(8)$   | $(\text{CH}_2\text{cycl})$ <b>C19-H11</b> ··· <b>O8</b> $(\text{COO-})_2$ & $(\text{CH})$ <b>C21-H26</b> ··· <b>O8</b> $(\text{COO-})$                                                                                                                                                                                                                                                                                                                                                                                                                                                                                                                                                                                                                                                                                                                                                                                                                 |
|                 | $D_3^3(10)$  | * $(\text{CH}_2)$ <b>C2-H20</b> ··· <b>O9</b> $(\text{COO-})_2$ & $(\text{CH})$ <b>C21-H26</b> ··· <b>O8</b> $(\text{COO-})$<br>* $(\text{CH})$ <b>C4-H15</b> ··· <b>O9</b> $(\text{COO-})_2$ & $(\text{CH}_2)$ <b>C5-H16</b> ··· <b>O1</b> $(\text{C=O})$<br>* $(\text{CH})$ <b>C4-H15</b> ··· <b>O9</b> $(\text{COO-})_2$ & $(\text{CH})$ <b>C21-H26</b> ··· <b>O8</b> $(\text{COO-})$<br>* $(\text{CH}_2)$ <b>C5-H16</b> ··· <b>O1</b> $(\text{C=O})$ & $(\text{CH})$ <b>C23-H27</b> ··· <b>O2</b> $(\text{C-O-C})_2$<br>* $(\text{CH}_3)$ <b>C15-H23</b> ··· <b>O9</b> $(\text{COO-})_2$ & $(\text{CH})$ <b>C21-H26</b> ··· <b>O8</b> $(\text{COO-})$<br>* $(\text{CH})$ <b>C21-H26</b> ··· <b>O8</b> $(\text{COO-})$ & $(\text{CH})$ <b>C23-H27</b> ··· <b>O2</b> $(\text{C-O-C})_2$                                                                                                                                                              |
|                 | $D_3^3(11)$  | $(\text{CH}_2\text{cycl})$ <b>C19-H12</b> ··· <b>O3</b> $(\text{C=O})$ & $(\text{CH}_2\text{cycl})$ <b>C19-H11</b> ··· <b>O8</b> $(\text{COO-})_2$                                                                                                                                                                                                                                                                                                                                                                                                                                                                                                                                                                                                                                                                                                                                                                                                     |
|                 | $D_3^3(12)$  | * $(\text{NH}_2^+)$ <b>N1-H6</b> ··· <b>O7</b> $(\text{COO-})_2$ & $(\text{CH}_2)$ <b>C5-H16</b> ··· <b>O1</b> $(\text{C=O})$<br>* $(\text{NH}_2^+)$ <b>N1-H6</b> ··· <b>O7</b> $(\text{COO-})_2$ & $(\text{CH})$ <b>C21-H26</b> ··· <b>O8</b> $(\text{COO-})$<br>* $(\text{CH}_2)$ <b>C5-H16</b> ··· <b>O1</b> $(\text{C=O})$ & $(\text{CH}_2)$ <b>C6-H19</b> ··· <b>O6</b> $(\text{COO-})_2$<br>* $(\text{CH}_2)$ <b>C5-H16</b> ··· <b>O1</b> $(\text{C=O})$ & $(\text{CH}_2)$ <b>C6-H19</b> ··· <b>O7</b> $(\text{COO-})_2$<br>* $(\text{CH}_2)$ <b>C6-H19</b> ··· <b>O6</b> $(\text{COO-})_2$ & $(\text{CH})$ <b>C21-H26</b> ··· <b>O8</b> $(\text{COO-})$<br>* $(\text{CH}_2)$ <b>C6-H19</b> ··· <b>O7</b> $(\text{COO-})_2$ & $(\text{CH})$ <b>C21-H26</b> ··· <b>O8</b> $(\text{COO-})$<br>* $(\text{CH}_2\text{cycl})$ <b>C19-H11</b> ··· <b>O8</b> $(\text{COO-})_2$ & $(\text{CH}_2\text{cycl})$ <b>C20-H14</b> ··· <b>O3</b> $(\text{C=O})$ |
|                 | $D_3^3(13)$  | $(\text{NH}_2^+)$ <b>N1-H6</b> ··· <b>O7</b> $(\text{COO-})_2$ & $(\text{NH}_2^+)$ <b>N1-H7</b> ··· <b>O5</b> $(\text{COO-})$                                                                                                                                                                                                                                                                                                                                                                                                                                                                                                                                                                                                                                                                                                                                                                                                                          |
|                 | $D_3^3(14)$  | * $(\text{NH}_2^+)$ <b>N1-H6</b> ··· <b>O7</b> $(\text{COO-})_2$ & $(\text{CH}_2\text{cycl})$ <b>C20-H14</b> ··· <b>O3</b> $(\text{C=O})$<br>* $(\text{CH}_2)$ <b>C2-H20</b> ··· <b>O9</b> $(\text{COO-})_2$ & $(\text{CH}_2)$ <b>C5-H16</b> ··· <b>O1</b> $(\text{C=O})$<br>* $(\text{CH}_3)$ <b>C15-H23</b> ··· <b>O9</b> $(\text{COO-})_2$ & $(\text{CH}_2\text{cycl})$ <b>C20-H14</b> ··· <b>O3</b> $(\text{C=O})$                                                                                                                                                                                                                                                                                                                                                                                                                                                                                                                                 |
|                 | $D_3^3(15)$  | * $(\text{NH}_2^+)$ <b>N1-H6</b> ··· <b>O7</b> $(\text{COO-})_2$ & $(\text{CH}_2\text{cycl})$ <b>C19-H12</b> ··· <b>O3</b> $(\text{C=O})$<br>* $(\text{NH}_2^+)$ <b>N1-H7</b> ··· <b>O5</b> $(\text{COO-})$ & $(\text{CH})$ <b>C4-H15</b> ··· <b>O9</b> $(\text{COO-})$<br>* $(\text{NH}_2^+)$ <b>N1-H7</b> ··· <b>O5</b> $(\text{COO-})$ & $(\text{CH}_3)$ <b>C15-H23</b> ··· <b>O9</b> $(\text{COO-})$<br>* $(\text{CH}_3)$ <b>C15-H23</b> ··· <b>O9</b> $(\text{COO-})_2$ & $(\text{CH}_2\text{cycl})$ <b>C19-H12</b> ··· <b>O3</b> $(\text{C=O})$                                                                                                                                                                                                                                                                                                                                                                                                  |
|                 | $D_3^3(16)$  | * $(\text{NH}_2^+)$ <b>N1-H7</b> ··· <b>O5</b> $(\text{COO-})$ & $(\text{CH}_2\text{cycl})$ <b>C19-H11</b> ··· <b>O8</b> $(\text{COO-})_2$<br>* $(\text{CH})$ <b>C4-H15</b> ··· <b>O9</b> $(\text{COO-})_2$ & $(\text{CH}_2\text{cycl})$ <b>C20-H14</b> ··· <b>O3</b> $(\text{C=O})$<br>* $(\text{CH}_2)$ <b>C5-H16</b> ··· <b>O1</b> $(\text{C=O})$ & $(\text{CH}_3)$ <b>C15-H23</b> ··· <b>O9</b> $(\text{COO-})_2$                                                                                                                                                                                                                                                                                                                                                                                                                                                                                                                                  |
|                 | $D_3^3(17)$  | * $(\text{NH}_2^+)$ <b>N1-H7</b> ··· <b>O5</b> $(\text{COO-})$ & $(\text{CH})$ <b>C23-H27</b> ··· <b>O2</b> $(\text{C-O-C})_2$<br>* $(\text{CH})$ <b>C4-H15</b> ··· <b>O9</b> $(\text{COO-})_2$ & $(\text{CH}_2\text{cycl})$ <b>C19-H12</b> ··· <b>O3</b> $(\text{C=O})$                                                                                                                                                                                                                                                                                                                                                                                                                                                                                                                                                                                                                                                                               |
|                 | $D_3^3(18)$  | $(\text{CH}_2\text{cycl})$ <b>C20-H14</b> ··· <b>O3</b> $(\text{C=O})$ & $(\text{CH})$ <b>C23-H27</b> ··· <b>O2</b> $(\text{C-O-C})_2$                                                                                                                                                                                                                                                                                                                                                                                                                                                                                                                                                                                                                                                                                                                                                                                                                 |
|                 | $D_3^3(19)$  | * $(\text{NH}_2^+)$ <b>N1-H7</b> ··· <b>O5</b> $(\text{COO-})$ & $(\text{CH}_2)$ <b>C6-H19</b> ··· <b>O6</b> $(\text{COO-})_2$<br>* $(\text{NH}_2^+)$ <b>N1-H7</b> ··· <b>O5</b> $(\text{COO-})$ & $(\text{CH}_2)$ <b>C6-H19</b> ··· <b>O7</b> $(\text{COO-})_2$<br>* $(\text{CH}_2\text{cycl})$ <b>C19-H12</b> ··· <b>O3</b> $(\text{C=O})$ & $(\text{CH})$ <b>C23-H27</b> ··· <b>O2</b> $(\text{C-O-C})_2$                                                                                                                                                                                                                                                                                                                                                                                                                                                                                                                                           |
|                 | $D_3^3(20)$  | * $(\text{CH}_2)$ <b>C6-H19</b> ··· <b>O6</b> $(\text{COO-})$ & $(\text{CH}_2\text{cycl})$ <b>C20-H14</b> ··· <b>O3</b> $(\text{C=O})$<br>* $(\text{CH}_2)$ <b>C6-H19</b> ··· <b>O7</b> $(\text{COO-})_2$ & $(\text{CH}_2\text{cycl})$ <b>C20-H14</b> ··· <b>O3</b> $(\text{C=O})$                                                                                                                                                                                                                                                                                                                                                                                                                                                                                                                                                                                                                                                                     |
| <b>GERWUX01</b> |              | $(\text{NH}_2^+)$ <b>N1-H2</b> ··· <b>O2</b> $(\text{COO-})$                                                                                                                                                                                                                                                                                                                                                                                                                                                                                                                                                                                                                                                                                                                                                                                                                                                                                           |
|                 | <b>C(6)</b>  | $(\text{CH}_2\text{cycl})$ <b>C17-H25</b> ··· <b>O5</b> $(\text{COO-})$                                                                                                                                                                                                                                                                                                                                                                                                                                                                                                                                                                                                                                                                                                                                                                                                                                                                                |
|                 | <b>C(8)</b>  | $(\text{CH}_2)$ <b>C15-H23</b> ··· <b>O3</b> $(\text{C=O})$                                                                                                                                                                                                                                                                                                                                                                                                                                                                                                                                                                                                                                                                                                                                                                                                                                                                                            |
|                 | <b>C(12)</b> | * $(\text{NH}_3^+)$ <b>N2-H3</b> ··· <b>O4</b> $(\text{COO-})$<br>* $(\text{NH}_3^+)$ <b>N2-H4</b> ··· <b>O5</b> $(\text{COO-})$<br>* $(\text{NH}_3^+)$ <b>N2-H5</b> ··· <b>O4</b> $(\text{COO-})$                                                                                                                                                                                                                                                                                                                                                                                                                                                                                                                                                                                                                                                                                                                                                     |
|                 | <b>D(2)</b>  | * $(\text{OH}_2)$ <b>O6-H32</b> ··· <b>O1</b> $(\text{COO-})$<br>* $(\text{OH}_2)$ <b>O6-H33</b> ··· <b>O1</b> $(\text{COO-})$<br>* $(\text{NH}_2^+)$ <b>N1-H1</b> ··· <b>O6</b> $(\text{OH}_2)$<br>* $(\text{CH})$ <b>C9-H15</b> ··· <b>O7</b> $(\text{OH}_2)$<br>* $(\text{CH}_2\text{cycl})$ <b>C17-H26</b> ··· <b>O6</b> $(\text{OH}_2)$                                                                                                                                                                                                                                                                                                                                                                                                                                                                                                                                                                                                           |
|                 | $D_3^3(12)$  | $(\text{COO-})$ <b>O1-H11</b> ··· <b>O6</b> $(\text{OH}_2)_2$ & $(\text{CH}_2)$ <b>C8-H9</b> ··· <b>O2</b> $(\text{COO-})$                                                                                                                                                                                                                                                                                                                                                                                                                                                                                                                                                                                                                                                                                                                                                                                                                             |
| <i>level 2</i>  | $R_2^2(6)$   | * $(\text{NH}_2^+)$ <b>N1-H12</b> ··· <b>O2</b> $(\text{COO-})$ & $(\text{CH}_2)$ <b>C8-H9</b> ··· <b>O2</b> $(\text{COO-})$<br>* $(\text{CH}_2)$ <b>C13-H16</b> ··· <b>O3</b> $(\text{C=O})$ & $(\text{CH}_2)$ <b>C15-H21</b> ··· <b>O3</b> $(\text{C=O})$                                                                                                                                                                                                                                                                                                                                                                                                                                                                                                                                                                                                                                                                                            |
|                 | $R_2^2(8)$   | $(\text{OH}_2)$ <b>O6-H32</b> ··· <b>N1</b> $(\text{NH}_2^+)$ & $(\text{CH}_2\text{cycl})$ <b>C17-H25</b> ··· <b>O6</b> $(\text{OH}_2)$                                                                                                                                                                                                                                                                                                                                                                                                                                                                                                                                                                                                                                                                                                                                                                                                                |
|                 | $R_2^2(10)$  | $(\text{NH}_3^+)$ <b>N2-H23</b> ··· <b>O4</b> $(\text{COO-})$ & $(\text{CH}_2)$ <b>C15-H21</b> ··· <b>O3</b> $(\text{C=O})$                                                                                                                                                                                                                                                                                                                                                                                                                                                                                                                                                                                                                                                                                                                                                                                                                            |
|                 | $R_2^2(12)$  | $(\text{NH}_3^+)$ <b>N2-H23</b> ··· <b>O4</b> $(\text{COO-})$ & $(\text{CH}_2)$ <b>C13-H16</b> ··· <b>O3</b> $(\text{C=O})$                                                                                                                                                                                                                                                                                                                                                                                                                                                                                                                                                                                                                                                                                                                                                                                                                            |
|                 | $R_2^2(13)$  | $(\text{NH}_2^+)$ <b>N1-H12</b> ··· <b>O2</b> $(\text{COO-})$ & $(\text{CH}_2)$ <b>C13-H16</b> ··· <b>O3</b> $(\text{C=O})$                                                                                                                                                                                                                                                                                                                                                                                                                                                                                                                                                                                                                                                                                                                                                                                                                            |
|                 | $R_2^2(14)$  | * $(\text{NH}_3^+)$ <b>N2-H23</b> ··· <b>O4</b> $(\text{COO-})$ & $(\text{CH}_2\text{cycl})$ <b>C17-H24</b> ··· <b>O5</b> $(\text{COO-})$<br>* $(\text{CH}_2)$ <b>C13-H16</b> ··· <b>O3</b> $(\text{C=O})$ & $(\text{CH}_2\text{cycl})$ <b>C17-H24</b> ··· <b>O5</b> $(\text{COO-})$                                                                                                                                                                                                                                                                                                                                                                                                                                                                                                                                                                                                                                                                   |
|                 | $R_2^2(15)$  | * $(\text{NH}_2^+)$ <b>N1-H12</b> ··· <b>O2</b> $(\text{COO-})$ & $(\text{CH}_2)$ <b>C15-H21</b> ··· <b>O3</b> $(\text{C=O})$<br>* $(\text{CH}_2)$ <b>C8-H9</b> ··· <b>O2</b> $(\text{COO-})$ & $(\text{CH}_2)$ <b>C13-H16</b> ··· <b>O3</b> $(\text{C=O})$                                                                                                                                                                                                                                                                                                                                                                                                                                                                                                                                                                                                                                                                                            |
|                 | $R_2^2(16)$  | $(\text{CH}_2)$ <b>C15-H21</b> ··· <b>O3</b> $(\text{C=O})$ & $(\text{CH}_2\text{cycl})$ <b>C17-H24</b> ··· <b>O5</b> $(\text{COO-})$                                                                                                                                                                                                                                                                                                                                                                                                                                                                                                                                                                                                                                                                                                                                                                                                                  |
|                 | $R_2^2(17)$  | * $(\text{NH}_2^+)$ <b>N1-H12</b> ··· <b>O2</b> $(\text{COO-})$ & $(\text{CH}_2\text{cycl})$ <b>C17-H24</b> ··· <b>O5</b> $(\text{COO-})$<br>* $(\text{CH}_2)$ <b>C8-H9</b> ··· <b>O2</b> $(\text{COO-})$ & $(\text{CH}_2)$ <b>C15-H21</b> ··· <b>O3</b> $(\text{C=O})$                                                                                                                                                                                                                                                                                                                                                                                                                                                                                                                                                                                                                                                                                |
|                 | $R_2^2(19)$  | * $(\text{NH}_2^+)$ <b>N1-H12</b> ··· <b>O2</b> $(\text{COO-})$ & $(\text{NH}_3^+)$ <b>N2-H23</b> ··· <b>O4</b> $(\text{COO-})$                                                                                                                                                                                                                                                                                                                                                                                                                                                                                                                                                                                                                                                                                                                                                                                                                        |

|               |        |                                                                                                                                                                                                                                                                                                                                                                                                                                                                                                                                                                                                                                                                                                                                                                                                                                                             |
|---------------|--------|-------------------------------------------------------------------------------------------------------------------------------------------------------------------------------------------------------------------------------------------------------------------------------------------------------------------------------------------------------------------------------------------------------------------------------------------------------------------------------------------------------------------------------------------------------------------------------------------------------------------------------------------------------------------------------------------------------------------------------------------------------------------------------------------------------------------------------------------------------------|
|               |        | * <sub>(CH<sub>2</sub>)</sub> C8-H9... <b>O2</b> <sub>(COO-)</sub> & <sub>(CH<sub>2</sub>cycl)</sub> C17-H24... <b>O5</b> <sub>(COO-)</sub>                                                                                                                                                                                                                                                                                                                                                                                                                                                                                                                                                                                                                                                                                                                 |
| $R_3^2(16)$   |        | <sub>(NH<sub>3+</sub>)</sub> N2-H22... <b>O4</b> <sub>(COO-)</sub> <sub>2</sub> & <sub>(NH<sub>3+</sub>)</sub> N2-H23... <b>O4</b> <sub>(COO-)</sub>                                                                                                                                                                                                                                                                                                                                                                                                                                                                                                                                                                                                                                                                                                        |
| $C_2^1(4)$    |        | <sub>(NH<sub>3+</sub>)</sub> N2-H22... <b>O4</b> <sub>(COO-)</sub> & <sub>(NH<sub>3+</sub>)</sub> N2-H23... <b>O4</b> <sub>(COO-)</sub>                                                                                                                                                                                                                                                                                                                                                                                                                                                                                                                                                                                                                                                                                                                     |
| $C_2^1(11)$   |        | <sub>(COO-)</sub> <b>O1</b> -H11...O6 <sub>(OH2)</sub> & <sub>(CH<sub>2</sub>cycl)</sub> C17-H25...O6 <sub>(OH2)</sub>                                                                                                                                                                                                                                                                                                                                                                                                                                                                                                                                                                                                                                                                                                                                      |
| $C_2^1(12)$   |        | <sub>(NH<sub>3+</sub>)</sub> N2-H31... <b>O5</b> <sub>(COO-)</sub> & <sub>(CH<sub>2</sub>cycl)</sub> C17-H24... <b>O5</b> <sub>(COO-)</sub>                                                                                                                                                                                                                                                                                                                                                                                                                                                                                                                                                                                                                                                                                                                 |
| $C_2^2(4)$    |        | <sub>(COO-)</sub> <b>O1</b> -H11...O6 <sub>(OH2)</sub> & <sub>(OH2)</sub> O6-H33... <b>O1</b> <sub>(COO-)</sub>                                                                                                                                                                                                                                                                                                                                                                                                                                                                                                                                                                                                                                                                                                                                             |
| $C_2^2(6)$    |        | * <sub>(NH<sub>3+</sub>)</sub> N2-H22... <b>O4</b> <sub>(COO-)</sub> & <sub>(NH<sub>3+</sub>)</sub> N2-H31... <b>O5</b> <sub>(COO-)</sub><br>* <sub>(NH<sub>3+</sub>)</sub> N2-H23... <b>O4</b> <sub>(COO-)</sub> & <sub>(NH<sub>3+</sub>)</sub> N2-H31... <b>O5</b> <sub>(COO-)</sub>                                                                                                                                                                                                                                                                                                                                                                                                                                                                                                                                                                      |
| $C_2^2(7)$    |        | * <sub>(COO-)</sub> <b>O1</b> -H11...O6 <sub>(OH2)</sub> & <sub>(OH2)</sub> O6-H32... <b>N1</b> <sub>(NH2+)</sub><br>* <sub>(OH2)</sub> O6-H32... <b>N1</b> <sub>(NH2+)</sub> & <sub>(OH2)</sub> O6-H33... <b>O1</b> <sub>(COO-)</sub>                                                                                                                                                                                                                                                                                                                                                                                                                                                                                                                                                                                                                      |
| $C_2^2(10)$   |        | * <sub>(NH<sub>2+</sub>)</sub> <b>N1</b> -H12... <b>O2</b> <sub>(COO-)</sub> & <sub>(CH<sub>2</sub>)</sub> C8-H9... <b>O2</b> <sub>(COO-)</sub><br>* <sub>(NH<sub>3+</sub>)</sub> N2-H22... <b>O4</b> <sub>(COO-)</sub> & <sub>(CH<sub>2</sub>)</sub> C15-H21...O3 <sub>(C=O)</sub><br>* <sub>(NH<sub>3+</sub>)</sub> N2-H31... <b>O5</b> <sub>(COO-)</sub> & <sub>(CH<sub>2</sub>)</sub> C15-H21...O3 <sub>(C=O)</sub>                                                                                                                                                                                                                                                                                                                                                                                                                                     |
| $C_2^2(11)$   |        | <sub>(OH2)</sub> O6-H33...O1 <sub>(COO-)</sub> & <sub>(CH<sub>2</sub>cycl)</sub> C17-H25...O6 <sub>(OH2)</sub>                                                                                                                                                                                                                                                                                                                                                                                                                                                                                                                                                                                                                                                                                                                                              |
| $C_2^2(12)$   |        | * <sub>(NH<sub>3+</sub>)</sub> N2-H22... <b>O4</b> <sub>(COO-)</sub> & <sub>(CH<sub>2</sub>)</sub> C13-H16...O3 <sub>(C=O)</sub><br>* <sub>(NH<sub>3+</sub>)</sub> N2-H31... <b>O5</b> <sub>(COO-)</sub> & <sub>(CH<sub>2</sub>)</sub> C13-H16...O3 <sub>(C=O)</sub>                                                                                                                                                                                                                                                                                                                                                                                                                                                                                                                                                                                        |
| $C_2^2(13)$   |        | <sub>(NH<sub>2+</sub>)</sub> <b>N1</b> -H12... <b>O2</b> <sub>(COO-)</sub> & <sub>(CH<sub>2</sub>)</sub> C13-H16...O3 <sub>(C=O)</sub>                                                                                                                                                                                                                                                                                                                                                                                                                                                                                                                                                                                                                                                                                                                      |
| $C_2^2(14)$   |        | * <sub>(NH<sub>3+</sub>)</sub> N2-H22... <b>O4</b> <sub>(COO-)</sub> & <sub>(CH<sub>2</sub>cycl)</sub> C17-H24... <b>O5</b> <sub>(COO-)</sub><br>* <sub>(CH<sub>2</sub>)</sub> C13-H16...O3 <sub>(C=O)</sub> & <sub>(CH<sub>2</sub>)</sub> C15-H21...O3 <sub>(C=O)</sub><br>* <sub>(CH<sub>2</sub>cycl)</sub> C17-H24... <b>O5</b> <sub>(COO-)</sub> & <sub>(CH<sub>2</sub>)</sub> C13-H16...O3 <sub>(C=O)</sub>                                                                                                                                                                                                                                                                                                                                                                                                                                            |
| $C_2^2(15)$   |        | * <sub>(NH<sub>2+</sub>)</sub> <b>N1</b> -H12... <b>O2</b> <sub>(COO-)</sub> & <sub>(CH<sub>2</sub>)</sub> C15-H21...O3 <sub>(C=O)</sub><br>* <sub>(CH<sub>2</sub>)</sub> C8-H9... <b>O2</b> <sub>(COO-)</sub> & <sub>(CH<sub>2</sub>)</sub> C13-H16...O3 <sub>(C=O)</sub>                                                                                                                                                                                                                                                                                                                                                                                                                                                                                                                                                                                  |
| $C_2^2(16)$   |        | <sub>(CH<sub>2</sub>)</sub> C15-H21...O3 <sub>(C=O)</sub> & <sub>(CH<sub>2</sub>cycl)</sub> C17-H24... <b>O5</b> <sub>(COO-)</sub>                                                                                                                                                                                                                                                                                                                                                                                                                                                                                                                                                                                                                                                                                                                          |
| $C_2^2(17)$   |        | * <sub>(CH<sub>2</sub>)</sub> C8-H9... <b>O2</b> <sub>(COO-)</sub> & <sub>(CH<sub>2</sub>)</sub> C15-H21...O3 <sub>(C=O)</sub><br>* <sub>(NH<sub>2+</sub>)</sub> <b>N1</b> -H12... <b>O2</b> <sub>(COO-)</sub> & <sub>(CH<sub>2</sub>cycl)</sub> C17-H24... <b>O5</b> <sub>(COO-)</sub>                                                                                                                                                                                                                                                                                                                                                                                                                                                                                                                                                                     |
| $C_2^2(18)$   |        | * <sub>(NH<sub>3+</sub>)</sub> N2-H22... <b>O4</b> <sub>(COO-)</sub> & <sub>(CH<sub>2</sub>)</sub> C13-H16...O3 <sub>(C=O)</sub><br>* <sub>(NH<sub>3+</sub>)</sub> N2-H22... <b>O4</b> <sub>(COO-)</sub> & <sub>(CH<sub>2</sub>cycl)</sub> C17-H24... <b>O5</b> <sub>(COO-)</sub><br>* <sub>(NH<sub>3+</sub>)</sub> N2-H23... <b>O4</b> <sub>(COO-)</sub> & <sub>(CH<sub>2</sub>)</sub> C13-H16...O3 <sub>(C=O)</sub><br>* <sub>(NH<sub>3+</sub>)</sub> N2-H23... <b>O4</b> <sub>(COO-)</sub> & <sub>(CH<sub>2</sub>cycl)</sub> C17-H24... <b>O5</b> <sub>(COO-)</sub><br>* <sub>(NH<sub>3+</sub>)</sub> N2-H31... <b>O5</b> <sub>(COO-)</sub> & <sub>(CH<sub>2</sub>cycl)</sub> C17-H24... <b>O5</b> <sub>(COO-)</sub><br>* <sub>(NH<sub>3+</sub>)</sub> N2-H31... <b>O5</b> <sub>(COO-)</sub> & <sub>(CH<sub>2</sub>)</sub> C13-H16...O3 <sub>(C=O)</sub> |
| $C_2^2(19)$   |        | * <sub>(NH<sub>2+</sub>)</sub> <b>N1</b> -H12... <b>O2</b> <sub>(COO-)</sub> & <sub>(NH<sub>3+</sub>)</sub> N2-H22... <b>O4</b> <sub>(COO-)</sub><br>* <sub>(NH<sub>2+</sub>)</sub> <b>N1</b> -H12... <b>O2</b> <sub>(COO-)</sub> & <sub>(NH<sub>3+</sub>)</sub> N2-H23... <b>O4</b> <sub>(COO-)</sub><br>* <sub>(NH<sub>2+</sub>)</sub> <b>N1</b> -H12... <b>O2</b> <sub>(COO-)</sub> & <sub>(NH<sub>3+</sub>)</sub> N2-H31... <b>O5</b> <sub>(COO-)</sub><br>* <sub>(CH<sub>2</sub>)</sub> C8-H9... <b>O2</b> <sub>(COO-)</sub> & <sub>(CH<sub>2</sub>cycl)</sub> C17-H24... <b>O5</b> <sub>(COO-)</sub>                                                                                                                                                                                                                                                  |
| $C_2^2(20)$   |        | * <sub>(NH<sub>3+</sub>)</sub> N2-H22... <b>O4</b> <sub>(COO-)</sub> & <sub>(CH<sub>2</sub>)</sub> C15-H21...O3 <sub>(C=O)</sub><br>* <sub>(NH<sub>3+</sub>)</sub> N2-H23... <b>O4</b> <sub>(COO-)</sub> & <sub>(CH<sub>2</sub>)</sub> C15-H21...O3 <sub>(C=O)</sub><br>* <sub>(NH<sub>3+</sub>)</sub> N2-H31... <b>O5</b> <sub>(COO-)</sub> & <sub>(CH<sub>2</sub>)</sub> C15-H21...O3 <sub>(C=O)</sub>                                                                                                                                                                                                                                                                                                                                                                                                                                                    |
| $D_3^3(8)$    |        | <sub>(OH2)</sub> O6-H32... <b>N1</b> <sub>(NH2+)</sub> <sub>2</sub> & <sub>(NH<sub>2+</sub>)</sub> <b>N1</b> -H12... <b>O2</b> <sub>(COO-)</sub>                                                                                                                                                                                                                                                                                                                                                                                                                                                                                                                                                                                                                                                                                                            |
| $D_3^3(10)$   |        | * <sub>(OH2)</sub> O6-H32... <b>N1</b> <sub>(NH2+)</sub> <sub>2</sub> & <sub>(NH<sub>2+</sub>)</sub> <b>N1</b> -H12... <b>O2</b> <sub>(COO-)</sub><br>* <sub>(OH2)</sub> O6-H32... <b>N1</b> <sub>(NH2+)</sub> <sub>2</sub> & <sub>(CH<sub>2</sub>)</sub> C8-H9... <b>O2</b> <sub>(COO-)</sub><br>* <sub>(OH2)</sub> O6-H33... <b>O1</b> <sub>(COO-)</sub> <sub>2</sub> & <sub>(CH<sub>2</sub>)</sub> C8-H9... <b>O2</b> <sub>(COO-)</sub>                                                                                                                                                                                                                                                                                                                                                                                                                  |
| $D_3^3(11)$   |        | * <sub>(CH<sub>2</sub>)</sub> C13-H16...O3 <sub>(C=O)</sub> & <sub>(OH2)</sub> O6-H32... <b>N1</b> <sub>(NH2+)</sub> <sub>2</sub><br>* <sub>(CH<sub>2</sub>cycl)</sub> C17-H24... <b>O5</b> <sub>(COO-)</sub> & <sub>(CH<sub>2</sub>cycl)</sub> C17-H25...O6 <sub>(OH2)</sub> <sub>2</sub>                                                                                                                                                                                                                                                                                                                                                                                                                                                                                                                                                                  |
| $D_3^3(12)$   |        | <sub>(COO-)</sub> <b>O1</b> -H11...O6 <sub>(OH2)</sub> <sub>2</sub> & <sub>(NH<sub>2+</sub>)</sub> <b>N1</b> -H12... <b>O2</b> <sub>(COO-)</sub>                                                                                                                                                                                                                                                                                                                                                                                                                                                                                                                                                                                                                                                                                                            |
| $D_3^3(13)$   |        | <sub>(OH2)</sub> O6-H32... <b>N1</b> <sub>(NH2+)</sub> <sub>2</sub> & <sub>(CH<sub>2</sub>)</sub> C15-H21...O3 <sub>(C=O)</sub>                                                                                                                                                                                                                                                                                                                                                                                                                                                                                                                                                                                                                                                                                                                             |
| $D_3^3(15)$   |        | * <sub>(OH2)</sub> O6-H32... <b>N1</b> <sub>(NH2+)</sub> <sub>2</sub> & <sub>(CH<sub>2</sub>cycl)</sub> C17-H24... <b>O5</b> <sub>(COO-)</sub><br>* <sub>(CH<sub>2</sub>)</sub> C13-H16...O3 <sub>(C=O)</sub> & <sub>(CH<sub>2</sub>cycl)</sub> C17-H25...O6 <sub>(OH2)</sub> <sub>2</sub>                                                                                                                                                                                                                                                                                                                                                                                                                                                                                                                                                                  |
| $D_3^3(17)$   |        | * <sub>(OH2)</sub> O6-H32... <b>N1</b> <sub>(NH2+)</sub> <sub>2</sub> & <sub>(NH<sub>3+</sub>)</sub> N2-H22... <b>O4</b> <sub>(COO-)</sub><br>* <sub>(OH2)</sub> O6-H32... <b>N1</b> <sub>(NH2+)</sub> <sub>2</sub> & <sub>(NH<sub>3+</sub>)</sub> N2-H23... <b>O4</b> <sub>(COO-)</sub><br>* <sub>(OH2)</sub> O6-H32... <b>N1</b> <sub>(NH2+)</sub> <sub>2</sub> & <sub>(NH<sub>3+</sub>)</sub> N2-H31... <b>O5</b> <sub>(COO-)</sub><br>* <sub>(OH2)</sub> O6-H32... <b>N1</b> <sub>(NH2+)</sub> <sub>2</sub> & <sub>(CH<sub>2</sub>)</sub> C13-H16...O3 <sub>(C=O)</sub><br>* <sub>(CH<sub>2</sub>)</sub> C15-H21...O3 <sub>(C=O)</sub> & <sub>(CH<sub>2</sub>cycl)</sub> C17-H25...O6 <sub>(OH2)</sub> <sub>2</sub>                                                                                                                                     |
| $D_3^3(18)$   |        | <sub>(NH<sub>2+</sub>)</sub> <b>N1</b> -H12... <b>O2</b> <sub>(COO-)</sub> & <sub>(CH<sub>2</sub>cycl)</sub> C17-H25...O6 <sub>(OH2)</sub> <sub>2</sub>                                                                                                                                                                                                                                                                                                                                                                                                                                                                                                                                                                                                                                                                                                     |
| $D_3^3(19)$   |        | * <sub>(COO-)</sub> <b>O1</b> -H11...O6 <sub>(OH2)</sub> <sub>2</sub> & <sub>(CH<sub>2</sub>)</sub> C13-H16...O3 <sub>(C=O)</sub><br>* <sub>(OH2)</sub> O6-H33... <b>O1</b> <sub>(COO-)</sub> <sub>2</sub> & <sub>(CH<sub>2</sub>)</sub> C15-H21...O3 <sub>(C=O)</sub><br>* <sub>(NH<sub>3+</sub>)</sub> N2-H22... <b>O4</b> <sub>(COO-)</sub> & <sub>(CH<sub>2</sub>cycl)</sub> C17-H25...O6 <sub>(OH2)</sub> <sub>2</sub><br>* <sub>(NH<sub>3+</sub>)</sub> N2-H23... <b>O4</b> <sub>(COO-)</sub> & <sub>(CH<sub>2</sub>cycl)</sub> C17-H25...O6 <sub>(OH2)</sub> <sub>2</sub><br>* <sub>(NH<sub>3+</sub>)</sub> N2-H31... <b>O5</b> <sub>(COO-)</sub> & <sub>(CH<sub>2</sub>cycl)</sub> C17-H25...O6 <sub>(OH2)</sub> <sub>2</sub>                                                                                                                       |
| $D_3^3(20)$   |        | <sub>(CH<sub>2</sub>)</sub> C8-H9... <b>O2</b> <sub>(COO-)</sub> & <sub>(CH<sub>2</sub>cycl)</sub> C17-H25...O6 <sub>(OH2)</sub> <sub>2</sub>                                                                                                                                                                                                                                                                                                                                                                                                                                                                                                                                                                                                                                                                                                               |
| <b>GERXAE</b> | $C(5)$ | * <sub>(CH<sub>2</sub>)</sub> C8-H9... <b>O2</b> <sub>(C=O_COOH)</sub><br>* <sub>(NH<sub>3+</sub>)</sub> N2-H12... <b>O2</b> <sub>(C=O_COOH)</sub>                                                                                                                                                                                                                                                                                                                                                                                                                                                                                                                                                                                                                                                                                                          |

|         |                                  |                                                                                                                                                                                                                                                                                                                                                                                                                                                                                                                                                                                                                                     |
|---------|----------------------------------|-------------------------------------------------------------------------------------------------------------------------------------------------------------------------------------------------------------------------------------------------------------------------------------------------------------------------------------------------------------------------------------------------------------------------------------------------------------------------------------------------------------------------------------------------------------------------------------------------------------------------------------|
|         | C(6)                             | * <sub>(CH2)</sub> C13-H16...O3 <sub>(C=O)</sub><br>* <sub>(CH2)</sub> C17-H24...O5 <sub>(COO-)</sub>                                                                                                                                                                                                                                                                                                                                                                                                                                                                                                                               |
|         | C(8)                             | <sub>(CH2)</sub> C15-H21...O3 <sub>(C=O)</sub>                                                                                                                                                                                                                                                                                                                                                                                                                                                                                                                                                                                      |
|         | C(12)                            | * <sub>(NH3+)</sub> N2-H22...O4 <sub>(COO-)</sub><br>* <sub>(NH3+)</sub> N2-H23...O4 <sub>(COO-)</sub><br>* <sub>(NH3+)</sub> N2-H31...O5 <sub>(COO-)</sub>                                                                                                                                                                                                                                                                                                                                                                                                                                                                         |
|         | D(2)                             | * <sub>(OH_COOH)</sub> O1-H11...O6 <sub>(OH2)</sub><br>* <sub>(OH2)</sub> O6-H32...N1 <sub>(NH)</sub><br>* <sub>(OH2)</sub> O6-H33...O1 <sub>(OH_COOH)</sub><br>* <sub>(CH2)</sub> C17-H25...O6 <sub>(OH2)</sub>                                                                                                                                                                                                                                                                                                                                                                                                                    |
| level 2 | R <sup>1</sup> <sub>2</sub> (6)  | * <sub>(NH)</sub> N1-H12...O2 <sub>(C=O_COOH)</sub> & <sub>(CH2)</sub> C8-H9...O2 <sub>(C=O_COOH)</sub><br>* <sub>(CH2)</sub> C13-H16...O3 <sub>(C=O)</sub> & <sub>(CH2)</sub> C15-H21...O3 <sub>(C=O)</sub>                                                                                                                                                                                                                                                                                                                                                                                                                        |
|         | R <sup>2</sup> <sub>2</sub> (8)  | ( <sub>(OH2)</sub> O6-H32...N1 <sub>(NH)</sub> ) <sub>2</sub> & <sub>(CH2)</sub> C17-H25...O6 <sub>(OH2)</sub>                                                                                                                                                                                                                                                                                                                                                                                                                                                                                                                      |
|         | R <sup>2</sup> <sub>2</sub> (10) | <sub>(NH3+)</sub> N2-H23...O4 <sub>(COO-)</sub> & <sub>(CH2)</sub> C15-H21...O3 <sub>(C=O)</sub>                                                                                                                                                                                                                                                                                                                                                                                                                                                                                                                                    |
|         | R <sup>2</sup> <sub>2</sub> (12) | <sub>(NH3+)</sub> N2-H23...O4 <sub>(COO-)</sub> & <sub>(CH2)</sub> C13-H16...O3 <sub>(C=O)</sub>                                                                                                                                                                                                                                                                                                                                                                                                                                                                                                                                    |
|         | R <sup>2</sup> <sub>2</sub> (13) | <sub>(NH)</sub> N1-H12...O2 <sub>(C=O_COOH)</sub> & <sub>(CH2)</sub> C13-H16...O3 <sub>(C=O)</sub>                                                                                                                                                                                                                                                                                                                                                                                                                                                                                                                                  |
|         | R <sup>2</sup> <sub>2</sub> (14) | * <sub>(NH3+)</sub> N2-H23...O4 <sub>(COO-)</sub> & <sub>(CH2)</sub> C17-H24...O5 <sub>(COO-)</sub><br>* <sub>(CH2)</sub> C13-H16...O3 <sub>(C=O)</sub> & <sub>(CH2)</sub> C17-H24...O5 <sub>(COO-)</sub>                                                                                                                                                                                                                                                                                                                                                                                                                           |
|         | R <sup>2</sup> <sub>2</sub> (15) | * <sub>(NH)</sub> N1-H12...O2 <sub>(C=O_COOH)</sub> & <sub>(CH2)</sub> C15-H21...O3 <sub>(C=O)</sub><br>* <sub>(CH2)</sub> C8-H9...O2 <sub>(C=O_COOH)</sub> & <sub>(CH2)</sub> C13-H16...O3 <sub>(C=O)</sub>                                                                                                                                                                                                                                                                                                                                                                                                                        |
|         | R <sup>2</sup> <sub>2</sub> (16) | <sub>(CH2)</sub> C15-H21...O3 <sub>(C=O)</sub> & <sub>(CH2)</sub> C17-H24...O5 <sub>(COO-)</sub>                                                                                                                                                                                                                                                                                                                                                                                                                                                                                                                                    |
|         | R <sup>2</sup> <sub>2</sub> (17) | * <sub>(NH)</sub> N1-H12...O2 <sub>(C=O_COOH)</sub> & <sub>(CH2)</sub> C17-H24...O5 <sub>(COO-)</sub><br>* <sub>(CH2)</sub> C8-H9...O2 <sub>(C=O_COOH)</sub> & <sub>(CH2)</sub> C15-H21...O3 <sub>(C=O)</sub>                                                                                                                                                                                                                                                                                                                                                                                                                       |
|         | R <sup>2</sup> <sub>2</sub> (19) | * <sub>(NH)</sub> N1-H12...O2 <sub>(C=O_COOH)</sub> & <sub>(NH3+)</sub> N2-H23...O4 <sub>(COO-)</sub><br>* <sub>(CH2)</sub> C8-H9...O2 <sub>(C=O_COOH)</sub> & <sub>(CH2)</sub> C17-H24...O5 <sub>(COO-)</sub>                                                                                                                                                                                                                                                                                                                                                                                                                      |
|         | R <sup>2</sup> <sub>2</sub> (16) | <sub>(NH3+)</sub> N2-H22...O4 <sub>(COO-)</sub> & <sub>(NH3+)</sub> N2-H23...O4 <sub>(COO-)</sub>                                                                                                                                                                                                                                                                                                                                                                                                                                                                                                                                   |
|         | C <sup>1</sup> <sub>2</sub> (4)  | <sub>(NH3+)</sub> N2-H22...O4 <sub>(COO-)</sub> & <sub>(NH3+)</sub> N2-H23...O4 <sub>(COO-)</sub>                                                                                                                                                                                                                                                                                                                                                                                                                                                                                                                                   |
|         | C <sup>1</sup> <sub>2</sub> (11) | <sub>(OH_COOH)</sub> O1-H11...O6 <sub>(OH2)</sub> & <sub>(CH2)</sub> C17-H25...O6 <sub>(OH2)</sub>                                                                                                                                                                                                                                                                                                                                                                                                                                                                                                                                  |
|         | C <sup>1</sup> <sub>2</sub> (12) | <sub>(NH3+)</sub> N2-H31...O5 <sub>(COO-)</sub> & <sub>(CH2)</sub> C17-H24...O5 <sub>(COO-)</sub>                                                                                                                                                                                                                                                                                                                                                                                                                                                                                                                                   |
|         | C <sup>2</sup> <sub>2</sub> (4)  | <sub>(OH_COOH)</sub> O1-H11...O6 <sub>(OH2)</sub> & <sub>(OH2)</sub> O6-H33...O1 <sub>(OH_COOH)</sub>                                                                                                                                                                                                                                                                                                                                                                                                                                                                                                                               |
|         | C <sup>2</sup> <sub>2</sub> (6)  | <sub>(NH3+)</sub> N2-H23...O4 <sub>(COO-)</sub> & <sub>(NH3+)</sub> N2-H31...O5 <sub>(COO-)</sub>                                                                                                                                                                                                                                                                                                                                                                                                                                                                                                                                   |
|         | C <sup>2</sup> <sub>2</sub> (7)  | * <sub>(OH_COOH)</sub> O1-H11...O6 <sub>(OH2)</sub> & <sub>(OH2)</sub> O6-H32...N1 <sub>(NH)</sub><br>* <sub>(OH2)</sub> O6-H32...N1 <sub>(NH)</sub> & <sub>(OH2)</sub> O6-H33...N1 <sub>(NH)</sub>                                                                                                                                                                                                                                                                                                                                                                                                                                 |
|         | C <sup>2</sup> <sub>2</sub> (10) | * <sub>(NH)</sub> N1-H12...O2 <sub>(C=O_COOH)</sub> & <sub>(CH2)</sub> C8-H9...O2 <sub>(C=O_COOH)</sub><br>* <sub>(NH3+)</sub> N2-H22...O4 <sub>(COO-)</sub> & <sub>(CH2)</sub> C15-H21...O3 <sub>(C=O)</sub><br>* <sub>(NH3+)</sub> N2-H31...O5 <sub>(COO-)</sub> & <sub>(CH2)</sub> C15-H21...O3 <sub>(C=O)</sub>                                                                                                                                                                                                                                                                                                                 |
|         | C <sup>2</sup> <sub>2</sub> (11) | <sub>(OH2)</sub> O6-H33...O1 <sub>(OH_COOH)</sub> & <sub>(CH2)</sub> C17-H25...O6 <sub>(OH2)</sub>                                                                                                                                                                                                                                                                                                                                                                                                                                                                                                                                  |
|         | C <sup>2</sup> <sub>2</sub> (12) | * <sub>(NH3+)</sub> N2-H22...O4 <sub>(COO-)</sub> & <sub>(CH2)</sub> C13-H16...O3 <sub>(C=O)</sub><br>* <sub>(NH3+)</sub> N2-H31...O5 <sub>(COO-)</sub> & <sub>(CH2)</sub> C13-H16...O3 <sub>(C=O)</sub>                                                                                                                                                                                                                                                                                                                                                                                                                            |
|         | C <sup>2</sup> <sub>2</sub> (13) | <sub>(NH)</sub> N1-H12...O2 <sub>(C=O_COOH)</sub> & <sub>(CH2)</sub> C13-H16...O3 <sub>(C=O)</sub>                                                                                                                                                                                                                                                                                                                                                                                                                                                                                                                                  |
|         | C <sup>2</sup> <sub>2</sub> (14) | * <sub>(CH2)</sub> C13-H16...O3 <sub>(C=O)</sub> & <sub>(CH2)</sub> C15-H21...O3 <sub>(C=O)</sub><br>* <sub>(CH2)</sub> C13-H16...O3 <sub>(C=O)</sub> & <sub>(CH2)</sub> C17-H24...O5 <sub>(COO-)</sub>                                                                                                                                                                                                                                                                                                                                                                                                                             |
|         | C <sup>2</sup> <sub>2</sub> (15) | * <sub>(NH)</sub> N1-H12...O2 <sub>(C=O_COOH)</sub> & <sub>(CH2)</sub> C15-H21...O3 <sub>(C=O)</sub><br>* <sub>(NH3+)</sub> N2-H22...O4 <sub>(COO-)</sub> & <sub>(CH2)</sub> C17-H24...O5 <sub>(COO-)</sub><br>* <sub>(CH2)</sub> C8-H9...O2 <sub>(C=O_COOH)</sub> & <sub>(CH2)</sub> C13-H16...O3 <sub>(C=O)</sub>                                                                                                                                                                                                                                                                                                                 |
|         | C <sup>2</sup> <sub>2</sub> (16) | <sub>(CH2)</sub> C15-H21...O3 <sub>(C=O)</sub> & <sub>(CH2)</sub> C17-H24...O5 <sub>(COO-)</sub>                                                                                                                                                                                                                                                                                                                                                                                                                                                                                                                                    |
|         | C <sup>2</sup> <sub>2</sub> (17) | * <sub>(NH)</sub> N1-H12...O2 <sub>(C=O_COOH)</sub> & <sub>(CH2)</sub> C17-H24...O5 <sub>(COO-)</sub><br>* <sub>(CH2)</sub> C8-H9...O2 <sub>(C=O_COOH)</sub> & <sub>(CH2)</sub> C15-H21...O3 <sub>(C=O)</sub>                                                                                                                                                                                                                                                                                                                                                                                                                       |
|         | C <sup>2</sup> <sub>2</sub> (18) | * <sub>(NH3+)</sub> N2-H22...O4 <sub>(COO-)</sub> & <sub>(CH2)</sub> C13-H16...O3 <sub>(C=O)</sub><br>* <sub>(NH3+)</sub> N2-H22...O4 <sub>(COO-)</sub> & <sub>(CH2)</sub> C17-H24...O5 <sub>(COO-)</sub><br>* <sub>(NH3+)</sub> N2-H23...O4 <sub>(COO-)</sub> & <sub>(CH2)</sub> C13-H16...O3 <sub>(C=O)</sub><br>* <sub>(NH3+)</sub> N2-H23...O4 <sub>(COO-)</sub> & <sub>(CH2)</sub> C17-H24...O5 <sub>(COO-)</sub><br>* <sub>(NH3+)</sub> N2-H31...O5 <sub>(COO-)</sub> & <sub>(CH2)</sub> C13-H16...O3 <sub>(C=O)</sub><br>* <sub>(NH3+)</sub> N2-H31...O5 <sub>(COO-)</sub> & <sub>(CH2)</sub> C17-H24...O5 <sub>(COO-)</sub> |
|         | C <sup>2</sup> <sub>2</sub> (19) | * <sub>(NH)</sub> N1-H12...O2 <sub>(C=O_COOH)</sub> & <sub>(NH3+)</sub> N2-H22...O4 <sub>(COO-)</sub><br>* <sub>(NH)</sub> N1-H12...O2 <sub>(C=O_COOH)</sub> & <sub>(NH3+)</sub> N2-H23...O4 <sub>(COO-)</sub><br>* <sub>(NH)</sub> N1-H12...O2 <sub>(C=O_COOH)</sub> & <sub>(NH3+)</sub> N2-H31...O5 <sub>(COO-)</sub><br>* <sub>(NH)</sub> N1-H12...O2 <sub>(C=O_COOH)</sub> & <sub>(NH3+)</sub> N2-H32...O4 <sub>(COO-)</sub><br>* <sub>(CH2)</sub> C8-H9...O2 <sub>(C=O_COOH)</sub> & <sub>(CH2)</sub> C17-H24...O5 <sub>(COO-)</sub>                                                                                           |
|         | C <sup>2</sup> <sub>2</sub> (20) | * <sub>(NH3+)</sub> N2-H22...O4 <sub>(COO-)</sub> & <sub>(CH2)</sub> C15-H21...O3 <sub>(C=O)</sub><br>* <sub>(NH3+)</sub> N2-H23...O4 <sub>(COO-)</sub> & <sub>(CH2)</sub> C15-H21...O3 <sub>(C=O)</sub><br>* <sub>(NH3+)</sub> N2-H31...O5 <sub>(COO-)</sub> & <sub>(CH2)</sub> C15-H21...O3 <sub>(C=O)</sub>                                                                                                                                                                                                                                                                                                                      |
|         | D <sup>3</sup> <sub>3</sub> (8)  | ( <sub>(OH2)</sub> O6-H32...N1 <sub>(NH)</sub> ) <sub>2</sub> & <sub>(NH)</sub> N1-H12...O2 <sub>(C=O_COOH)</sub>                                                                                                                                                                                                                                                                                                                                                                                                                                                                                                                   |

|               |             |                                                                                                                                                                                                                                                                                                                                                                                                                                                                                                                                                                                                                                                                                                                                                                                                     |
|---------------|-------------|-----------------------------------------------------------------------------------------------------------------------------------------------------------------------------------------------------------------------------------------------------------------------------------------------------------------------------------------------------------------------------------------------------------------------------------------------------------------------------------------------------------------------------------------------------------------------------------------------------------------------------------------------------------------------------------------------------------------------------------------------------------------------------------------------------|
|               | $D_3^3(10)$ | * $(_{(OH_2)}O_6-H_{32} \cdots N1_{(NH)_2} \& (CH_2)C_8-H_9 \cdots O2_{(C=O\_COOH)}$<br>* $(_{(OH_2)}O_6-H_{33} \cdots O1_{(OH\_COOH)_2} \& (NH)N1-H_{12} \cdots O2_{(C=O\_COOH)}$<br>* $(_{(OH_2)}O_6-H_{33} \cdots O1_{(OH\_COOH)_2} \& (CH_2)C_8-H_9 \cdots O2_{(C=O\_COOH)}$                                                                                                                                                                                                                                                                                                                                                                                                                                                                                                                    |
|               | $D_3^3(11)$ | * $(_{(OH_2)}O_6-H_{32} \cdots N1_{(NH)_2} \& (CH_2)C_{13}-H_{16} \cdots O3_{(C=O)}$<br>* $(_{(CH_2)}C_{17}-H_{24} \cdots O5_{(COO-)} \& (_{(CH_2)}C_{17}-H_{25} \cdots O6_{(OH_2)_2}$                                                                                                                                                                                                                                                                                                                                                                                                                                                                                                                                                                                                              |
|               | $D_3^3(12)$ | * $(_{(OH\_COOH)}O_1-H_{11} \cdots O6_{(OH_2)_2} \& (NH)N1-H_{12} \cdots O2_{(C=O\_COOH)}$<br>* $(_{(OH\_COOH)}O_1-H_{11} \cdots O6_{(OH_2)_2} \& (CH_2)C_8-H_9 \cdots O2_{(C=O\_COOH)}$                                                                                                                                                                                                                                                                                                                                                                                                                                                                                                                                                                                                            |
|               | $D_3^3(13)$ | $(_{(OH_2)}O_6-H_{32} \cdots N1_{(NH)_2} \& (CH_2)C_{15}-H_{21} \cdots O3_{(C=O)}$                                                                                                                                                                                                                                                                                                                                                                                                                                                                                                                                                                                                                                                                                                                  |
|               | $D_3^3(15)$ | * $(_{(OH_2)}O_6-H_{32} \cdots N1_{(NH)_2} \& (CH_2)C_{17}-H_{24} \cdots O5_{(COO-)}$<br>* $(_{(CH_2)}C_{13}-H_{16} \cdots O3_{(C=O)} \& (_{(CH_2)}C_{17}-H_{25} \cdots O6_{(OH_2)}$                                                                                                                                                                                                                                                                                                                                                                                                                                                                                                                                                                                                                |
|               | $D_3^3(17)$ | * $(_{(OH_2)}O_6-H_{32} \cdots N1_{(NH)_2} \& (NH_3+)N_2-H_{22} \cdots O4_{(COO-)}$<br>* $(_{(OH_2)}O_6-H_{32} \cdots N1_{(NH)_2} \& (NH_3+)N_2-H_{23} \cdots O4_{(COO-)}$<br>* $(_{(OH_2)}O_6-H_{32} \cdots N1_{(NH)_2} \& (NH_3+)N_2-H_{31} \cdots O5_{(COO-)}$<br>* $(_{(OH_2)}O_6-H_{33} \cdots O1_{(OH\_COOH)_2} \& (CH_2)C_{13}-H_{16} \cdots O3_{(C=O)}$<br>* $(_{(CH_2)}C_{15}-H_{21} \cdots O3_{(C=O)} \& (_{(CH_2)}C_{17}-H_{25} \cdots O6_{(OH_2)_2}$                                                                                                                                                                                                                                                                                                                                    |
|               | $D_3^3(18)$ | $(NH)N1-H_{12} \cdots O2_{(C=O\_COOH)} \& (CH_2)C_{17}-H_{25} \cdots O6_{(OH_2)}$                                                                                                                                                                                                                                                                                                                                                                                                                                                                                                                                                                                                                                                                                                                   |
|               | $D_3^3(19)$ | * $(_{(OH\_COOH)}O_1-H_{11} \cdots O6_{(OH_2)_2} \& (CH_2)C_{13}-H_{16} \cdots O3_{(C=O)}$<br>* $(_{(OH_2)}O_6-H_{33} \cdots O1_{(OH\_COOH)_2} \& (CH_2)C_{15}-H_{21} \cdots O3_{(C=O)}$<br>* $(NH_3+)N_2-H_{22} \cdots O4_{(COO-)} \& (_{(CH_2)}C_{17}-H_{25} \cdots O6_{(OH_2)_2}$<br>* $(NH_3+)N_2-H_{23} \cdots O4_{(COO-)} \& (_{(CH_2)}C_{17}-H_{25} \cdots O6_{(OH_2)_2}$<br>* $(NH_3+)N_2-H_{31} \cdots O5_{(COO-)} \& (_{(CH_2)}C_{17}-H_{25} \cdots O6_{(OH_2)_2}$                                                                                                                                                                                                                                                                                                                        |
|               | $D_3^3(20)$ | $(CH_2)C_8-H_9 \cdots O2_{(C=O\_COOH)} \& (CH_2)C_{17}-H_{25} \cdots O6_{(OH_2)_2}$                                                                                                                                                                                                                                                                                                                                                                                                                                                                                                                                                                                                                                                                                                                 |
| <b>GERXEI</b> | $C(2)$      | $(_{(OH\_COOH)}O_2-H_{11} \cdots O2_{(OH\_COOH)}$                                                                                                                                                                                                                                                                                                                                                                                                                                                                                                                                                                                                                                                                                                                                                   |
|               | $C(5)$      | * $(NH)N1-H_{12} \cdots O1_{(C=O\_COOH)}$<br>* $(CH_2)C_8-H_8 \cdots O1_{(C=O\_COOH)}$                                                                                                                                                                                                                                                                                                                                                                                                                                                                                                                                                                                                                                                                                                              |
|               | $C(6)$      | * $(CH_2)C_7-H_7 \cdots O1_{(C=O\_COOH)}$<br>* $(CH_2)C_7-H_{24} \cdots O5_{(COO-)}$<br>* $(CH_2)C_{13}-H_{16} \cdots O3_{(C=O)}$                                                                                                                                                                                                                                                                                                                                                                                                                                                                                                                                                                                                                                                                   |
|               | $C(9)$      | * $(CH_2cycl)C_{17}-H_{25} \cdots O1_{(C=O\_COOH)}$<br>* $(CH_2cycl)C_{17}-H_{25} \cdots O2_{(OH\_COOH)}$                                                                                                                                                                                                                                                                                                                                                                                                                                                                                                                                                                                                                                                                                           |
|               | $C(12)$     | $(NH_3+)N_2-H_{22} \cdots O4_{(COO-)}$<br>$(NH_3+)N_2-H_{23} \cdots O4_{(COO-)}$<br>$(NH_3+)N_2-H_{31} \cdots O5_{(COO-)}$                                                                                                                                                                                                                                                                                                                                                                                                                                                                                                                                                                                                                                                                          |
|               | $C(15)$     | $(CHcycl)C_4-H_3 \cdots O5_{(COO-)}$                                                                                                                                                                                                                                                                                                                                                                                                                                                                                                                                                                                                                                                                                                                                                                |
|               | $C_2^1(4)$  | $(NH_3+)N_2-H_{22} \cdots O4_{(COO-)} \& (NH_3+)N_2-H_{23} \cdots O4_{(COO-)}$                                                                                                                                                                                                                                                                                                                                                                                                                                                                                                                                                                                                                                                                                                                      |
|               | $C_2^1(8)$  | $(NH)N1-H_{12} \cdots O1_{(C=O\_COOH)} \& (CH_2cycl)C_{17}-H_{25} \cdots O1_{(C=O\_COOH)}$                                                                                                                                                                                                                                                                                                                                                                                                                                                                                                                                                                                                                                                                                                          |
|               | $C_2^1(10)$ | $(CH_2)C_8-H_8 \cdots O1_{(C=O\_COOH)} \& (CH_2cycl)C_{17}-H_{25} \cdots O1_{(C=O\_COOH)}$                                                                                                                                                                                                                                                                                                                                                                                                                                                                                                                                                                                                                                                                                                          |
|               | $C_2^1(11)$ | * $(_{(OH\_COOH)}O_2-H_{11} \cdots O2_{(OH\_COOH)} \& (CH_2cycl)C_{17}-H_{25} \cdots O2_{(OH\_COOH)}$<br>* $(CH_2)C_7-H_7 \cdots O1_{(C=O\_COOH)} \& (CH_2cycl)C_{17}-H_{25} \cdots O1_{(C=O\_COOH)}$                                                                                                                                                                                                                                                                                                                                                                                                                                                                                                                                                                                               |
|               | $C_2^1(12)$ | $(NH_3+)N_2-H_{31} \cdots O5_{(COO-)} \& (CH_2cycl)C_{17}-H_{24} \cdots O5_{(COO-)}$                                                                                                                                                                                                                                                                                                                                                                                                                                                                                                                                                                                                                                                                                                                |
|               | $C_2^1(15)$ | $(CH_2cycl)C_{17}-H_{24} \cdots O5_{(COO-)} \& (CHcycl)C_4-H_3 \cdots O5_{(COO-)}$                                                                                                                                                                                                                                                                                                                                                                                                                                                                                                                                                                                                                                                                                                                  |
|               | $C_2^1(17)$ | $(NH_3+)N_2-H_{31} \cdots O5_{(COO-)} \& (CHcycl)C_4-H_3 \cdots O5_{(COO-)}$                                                                                                                                                                                                                                                                                                                                                                                                                                                                                                                                                                                                                                                                                                                        |
|               | $C_2^2(6)$  | * $(NH_3+)N_2-H_{22} \cdots O4_{(COO-)} \& (NH_3+)N_2-H_{31} \cdots O5_{(COO-)}$<br>* $(NH_3+)N_2-H_{23} \cdots O4_{(COO-)} \& (NH_3+)N_2-H_{31} \cdots O5_{(COO-)}$                                                                                                                                                                                                                                                                                                                                                                                                                                                                                                                                                                                                                                |
|               | $C_2^2(9)$  | * $(_{(OH\_COOH)}O_2-H_{11} \cdots O2_{(OH\_COOH)} \& (NH)N1-H_{12} \cdots O1_{(C=O\_COOH)}$<br>* $(_{(OH\_COOH)}O_2-H_{11} \cdots O2_{(OH\_COOH)} \& (CH_2)C_8-H_8 \cdots O1_{(C=O\_COOH)}$                                                                                                                                                                                                                                                                                                                                                                                                                                                                                                                                                                                                        |
|               | $C_2^2(10)$ | * $(_{(OH\_COOH)}O_2-H_{11} \cdots O2_{(OH\_COOH)} \& (CH_2)C_7-H_7 \cdots O1_{(C=O\_COOH)}$<br>* $(NH)N1-H_{12} \cdots O1_{(C=O\_COOH)} \& (CH_2)C_8-H_8 \cdots O1_{(C=O\_COOH)}$<br>* $(NH)N1-H_{12} \cdots O1_{(C=O\_COOH)} \& (CH_2cycl)C_{17}-H_{25} \cdots O2_{(OH\_COOH)}$                                                                                                                                                                                                                                                                                                                                                                                                                                                                                                                   |
|               | $C_2^2(11)$ | * $(NH)N1-H_{12} \cdots O1_{(C=O\_COOH)} \& (CH_2)C_7-H_7 \cdots O1_{(C=O\_COOH)}$<br>* $(CH_2)C_7-H_7 \cdots O1_{(C=O\_COOH)} \& (CH_2)C_8-H_8 \cdots O1_{(C=O\_COOH)}$                                                                                                                                                                                                                                                                                                                                                                                                                                                                                                                                                                                                                            |
|               | $C_2^2(12)$ | * $(NH_3+)N_2-H_{22} \cdots O4_{(COO-)} \& (CH_2)C_{13}-H_{16} \cdots O3_{(C=O)}$<br>* $(CH_2)C_8-H_8 \cdots O1_{(C=O\_COOH)} \& (CH_2cycl)C_{17}-H_{25} \cdots O1_{(C=O\_COOH)}$<br>* $(NH_3+)N_2-H_{31} \cdots O5_{(COO-)} \& (CH_2)C_{13}-H_{16} \cdots O3_{(C=O)}$                                                                                                                                                                                                                                                                                                                                                                                                                                                                                                                              |
|               | $C_2^2(13)$ | * $(_{(OH\_COOH)}O_2-H_{11} \cdots O2_{(OH\_COOH)} \& (CH_2cycl)C_{17}-H_{25} \cdots O1_{(C=O\_COOH)}$<br>* $(NH)N1-H_{12} \cdots O1_{(C=O\_COOH)} \& (CH_2)C_{13}-H_{16} \cdots O3_{(C=O)}$<br>* $(NH)N1-H_{12} \cdots O1_{(C=O\_COOH)} \& (CH_2cycl)C_{17}-H_{25} \cdots O2_{(OH\_COOH)}$<br>* $(CH_2)C_7-H_7 \cdots O1_{(C=O\_COOH)} \& (CH_2cycl)C_{17}-H_{25} \cdots O1_{(C=O\_COOH)}$<br>* $(CH_2)C_{13}-H_{16} \cdots O3_{(C=O)} \& (CH_2cycl)C_{17}-H_{25} \cdots O1_{(C=O\_COOH)}$<br>* $(CH_2)C_{13}-H_{16} \cdots O3_{(C=O)} \& (CH_2cycl)C_{17}-H_{25} \cdots O2_{(OH\_COOH)}$<br>* $(CH_2cycl)C_{17}-H_{24} \cdots O5_{(COO-)} \& (CH_2cycl)C_{17}-H_{25} \cdots O1_{(C=O\_COOH)}$<br>* $(CH_2cycl)C_{17}-H_{24} \cdots O5_{(COO-)} \& (CH_2cycl)C_{17}-H_{25} \cdots O2_{(OH\_COOH)}$ |

|         |             |                                                                                                                                                                                                                                                                                                                                                                                                                                                                                                                                                                                                                                                                                                                                                                                                                                                                                                                      |
|---------|-------------|----------------------------------------------------------------------------------------------------------------------------------------------------------------------------------------------------------------------------------------------------------------------------------------------------------------------------------------------------------------------------------------------------------------------------------------------------------------------------------------------------------------------------------------------------------------------------------------------------------------------------------------------------------------------------------------------------------------------------------------------------------------------------------------------------------------------------------------------------------------------------------------------------------------------|
|         | $C_2^2(14)$ | <p>*<sub>(NH)</sub>N1-H12...O1<sub>(C=O_COOH)</sub> &amp; (CH2cycl)C17-H25...O1<sub>(C=O_COOH)</sub></p> <p>*<sub>(NH3+)</sub>N2-H22...O4<sub>(COO-)</sub> &amp; (CH2cycl)C17-H24...O5<sub>(COO-)</sub></p> <p>*<sub>(CH2)</sub>C8-H8...O1<sub>(C=O_COOH)</sub> &amp; (CH2cycl)C17-H25...O1<sub>(C=O_COOH)</sub></p> <p>*<sub>(CH2)</sub>C13-H16...O3<sub>(C=O)</sub> &amp; (CH2cycl)C17-H24...O5<sub>(COO-)</sub></p>                                                                                                                                                                                                                                                                                                                                                                                                                                                                                               |
|         | $C_2^2(15)$ | <p>*<sub>(CH2)</sub>C7-H7...O1<sub>(C=O_COOH)</sub> &amp; (CH2cycl)C17-H25...O1<sub>(C=O_COOH)</sub></p> <p>*<sub>(CH2)</sub>C8-H8...O1<sub>(C=O_COOH)</sub> &amp; (CH2)C13-H16...O3<sub>(C=O)</sub></p> <p>*<sub>(CH2)</sub>C13-H16...O3<sub>(C=O)</sub> &amp; (CH2cycl)C17-H25...O1<sub>(C=O_COOH)</sub></p> <p>*<sub>(CH2)</sub>C13-H16...O3<sub>(C=O)</sub> &amp; (CH2cycl)C17-H25...O2<sub>(OH_COOH)</sub></p> <p>*<sub>(CH2cycl)</sub>C17-H24...O5<sub>(COO-)</sub> &amp; (CH2cycl)C17-H25...O2<sub>(OH_COOH)</sub></p>                                                                                                                                                                                                                                                                                                                                                                                        |
|         | $C_2^2(16)$ | <p>*<sub>(OH_COOH)</sub>O2-H11...O2<sub>(OH_COOH)</sub> &amp; (CH2)C13-H16...O3<sub>(C=O)</sub></p> <p>*<sub>(CH2)</sub>C13-H16...O3<sub>(C=O)</sub> &amp; (CH2)C7-H7...O1<sub>(C=O_COOH)</sub></p> <p>*<sub>(CH2cycl)</sub>C17-H24...O5<sub>(COO-)</sub> &amp; (CH2cycl)C17-H25...O1<sub>(C=O_COOH)</sub></p> <p>*<sub>(CH2cycl)</sub>C17-H25...O1<sub>(C=O_COOH)</sub> &amp; (CHcycl)C4-H3...O5<sub>(COO-)</sub></p> <p>*<sub>(CH2cycl)</sub>C17-H25...O2<sub>(OH_COOH)</sub> &amp; (CHcycl)C4-H3...O5<sub>(COO-)</sub></p>                                                                                                                                                                                                                                                                                                                                                                                        |
| level 2 | $C_2^2(17)$ | <p>*<sub>(NH)</sub>N1-H12...O1<sub>(C=O_COOH)</sub> &amp; (CH2cycl)C17-H24...O5<sub>(COO-)</sub></p> <p>*<sub>(NH3+)</sub>N2-H22...O4<sub>(COO-)</sub> &amp; (CH2cycl)C17-H25...O1<sub>(C=O_COOH)</sub></p> <p>*<sub>(NH3+)</sub>N2-H22...O4<sub>(COO-)</sub> &amp; (CH2cycl)C17-H25...O2<sub>(OH_COOH)</sub></p> <p>*<sub>(NH3+)</sub>N2-H23...O4<sub>(COO-)</sub> &amp; (CH2cycl)C17-H25...O1<sub>(C=O_COOH)</sub></p> <p>*<sub>(NH3+)</sub>N2-H23...O4<sub>(COO-)</sub> &amp; (CH2cycl)C17-H25...O2<sub>(OH_COOH)</sub></p> <p>*<sub>(NH3+)</sub>N2-H31...O5<sub>(COO-)</sub> &amp; (CH2cycl)C17-H25...O1<sub>(C=O_COOH)</sub></p> <p>*<sub>(NH3+)</sub>N2-H31...O5<sub>(COO-)</sub> &amp; (CH2cycl)C17-H25...O2<sub>(OH_COOH)</sub></p> <p>*<sub>(CHcycl)</sub>C4-H3...O5<sub>(COO-)</sub> &amp; (CH2)C7-H7...O1<sub>(C=O_COOH)</sub></p>                                                                        |
|         | $C_2^2(18)$ | <p>*<sub>(NH)</sub>N1-H12...O1<sub>(C=O_COOH)</sub> &amp; (CHcycl)C4-H3...O5<sub>(COO-)</sub></p> <p>*<sub>(NH3+)</sub>N2-H22...O4<sub>(COO-)</sub> &amp; (CH2)C13-H16...O3<sub>(C=O)</sub></p> <p>*<sub>(NH3+)</sub>N2-H22...O4<sub>(COO-)</sub> &amp; (CH2cycl)C17-H24...O5<sub>(COO-)</sub></p> <p>*<sub>(NH3+)</sub>N2-H23...O4<sub>(COO-)</sub> &amp; (CH2cycl)C17-H24...O5<sub>(COO-)</sub></p> <p>*<sub>(NH3+)</sub>N2-H23...O4<sub>(COO-)</sub> &amp; (CH2)C13-H16...O3<sub>(C=O)</sub></p> <p>*<sub>(NH3+)</sub>N2-H31...O5<sub>(COO-)</sub> &amp; (CH2)C13-H16...O3<sub>(C=O)</sub></p> <p>*<sub>(NH3+)</sub>N2-H31...O5<sub>(COO-)</sub> &amp; (CH2cycl)C17-H24...O5<sub>(COO-)</sub></p> <p>*<sub>(CHcycl)</sub>C4-H3...O5<sub>(COO-)</sub> &amp; (CH2)C8-H8...O1<sub>(C=O_COOH)</sub></p> <p>*<sub>(CH2cycl)</sub>C17-H25...O1<sub>(C=O_COOH)</sub> &amp; (CH2cycl)C17-H25...O2<sub>(OH_COOH)</sub></p> |
|         | $C_2^2(19)$ | <p>*<sub>(NH)</sub>N1-H12...O1<sub>(C=O_COOH)</sub> &amp; (NH3+)N2-H22...O4<sub>(COO-)</sub></p> <p>*<sub>(NH)</sub>N1-H12...O1<sub>(C=O_COOH)</sub> &amp; (NH3+)N2-H23...O4<sub>(COO-)</sub></p> <p>*<sub>(NH)</sub>N1-H12...O1<sub>(C=O_COOH)</sub> &amp; (NH3+)N2-H31...O5<sub>(COO-)</sub></p> <p>*<sub>(NH3+)</sub>N2-H22...O4<sub>(COO-)</sub> &amp; (CHcycl)C4-H3...O5<sub>(COO-)</sub></p> <p>*<sub>(NH3+)</sub>N2-H23...O4 &amp; (CHcycl)C4-H3...O5<sub>(COO-)</sub></p> <p>*<sub>(CHcycl)</sub>C4-H3...O5<sub>(COO-)</sub> &amp; (CH2)C13-H16...O3<sub>(C=O)</sub></p> <p>*<sub>(CH2)</sub>C8-H8...O1<sub>(C=O_COOH)</sub> &amp; (CH2cycl)C17-H24...O5<sub>(COO-)</sub></p>                                                                                                                                                                                                                                |
|         | $C_2^2(20)$ | <p>*<sub>(OH_COOH)</sub>O2-H11...O2<sub>(OH_COOH)</sub> &amp; (CH2cycl)C17-H24...O5<sub>(COO-)</sub></p> <p>*<sub>(NH)</sub>N1-H12...O1<sub>(C=O_COOH)</sub> &amp; (CHcycl)C4-H3...O5<sub>(COO-)</sub></p> <p>*<sub>(CHcycl)</sub>C4-H3...O5<sub>(COO-)</sub> &amp; (CH2)C8-H8...O1<sub>(C=O_COOH)</sub></p> <p>*<sub>(CH2)</sub>C7-H7...O1<sub>(C=O_COOH)</sub> &amp; (CH2cycl)C17-H24...O5<sub>(COO-)</sub></p>                                                                                                                                                                                                                                                                                                                                                                                                                                                                                                    |
|         | $R_2^1(5)$  | (CH2)C7-H7...O1 <sub>(C=O_COOH)</sub> & (CH2)C8-H8...O1 <sub>(C=O_COOH)</sub>                                                                                                                                                                                                                                                                                                                                                                                                                                                                                                                                                                                                                                                                                                                                                                                                                                        |
|         | $R_2^1(6)$  | (NH)N1-H12...O1 <sub>(C=O_COOH)</sub> & (CH2)C8-H8...O1 <sub>(C=O_COOH)</sub>                                                                                                                                                                                                                                                                                                                                                                                                                                                                                                                                                                                                                                                                                                                                                                                                                                        |
|         | $R_2^1(7)$  | (NH)N1-H12...O1 <sub>(C=O_COOH)</sub> & (CH2)C7-H7...O1 <sub>(C=O_COOH)</sub>                                                                                                                                                                                                                                                                                                                                                                                                                                                                                                                                                                                                                                                                                                                                                                                                                                        |
|         | $R_2^2(11)$ | (OH_COOH)O2-H11...O2 <sub>(OH_COOH)</sub> & (CH2cycl)C17-H25...O2 <sub>(OH_COOH)</sub>                                                                                                                                                                                                                                                                                                                                                                                                                                                                                                                                                                                                                                                                                                                                                                                                                               |
|         | $R_2^2(12)$ | (CH2cycl)C17-H25...O1 <sub>(C=O_COOH)</sub> & (CH2cycl)C17-H25...O2 <sub>(OH_COOH)</sub>                                                                                                                                                                                                                                                                                                                                                                                                                                                                                                                                                                                                                                                                                                                                                                                                                             |
|         | $R_2^2(13)$ | (NH3+)N2-H23...O4 <sub>(COO-)</sub> & (CH2)C13-H16...O3 <sub>(C=O)</sub>                                                                                                                                                                                                                                                                                                                                                                                                                                                                                                                                                                                                                                                                                                                                                                                                                                             |
|         | $R_2^2(14)$ | (OH_COOH)O2-H11...O2 <sub>(OH_COOH)</sub> & (CH2cycl)C17-H25...O1 <sub>(C=O_COOH)</sub>                                                                                                                                                                                                                                                                                                                                                                                                                                                                                                                                                                                                                                                                                                                                                                                                                              |
|         | $R_2^2(15)$ | (NH)N1-H12...O4 <sub>(COO-)</sub> & (CH2)C13-H16...O3 <sub>(C=O)</sub>                                                                                                                                                                                                                                                                                                                                                                                                                                                                                                                                                                                                                                                                                                                                                                                                                                               |
|         | $R_2^2(16)$ | (NH3+)N2-H23...O4 <sub>(COO-)</sub> & (CH2cycl)C17-H24...O5 <sub>(COO-)</sub>                                                                                                                                                                                                                                                                                                                                                                                                                                                                                                                                                                                                                                                                                                                                                                                                                                        |
|         | $R_2^2(17)$ | (CH2)C8-H8...O1 <sub>(C=O_COOH)</sub> & (CH2)C13-H16...O3 <sub>(C=O)</sub>                                                                                                                                                                                                                                                                                                                                                                                                                                                                                                                                                                                                                                                                                                                                                                                                                                           |
|         | $R_2^2(18)$ | (CH2)C7-H7...O1 <sub>(C=O_COOH)</sub> & (CH2)C13-H16...O3 <sub>(C=O)</sub>                                                                                                                                                                                                                                                                                                                                                                                                                                                                                                                                                                                                                                                                                                                                                                                                                                           |
|         | $R_2^2(19)$ | (NH)N1-H12...O1 <sub>(C=O_COOH)</sub> & (CH2cycl)C17-H24...O5 <sub>(COO-)</sub>                                                                                                                                                                                                                                                                                                                                                                                                                                                                                                                                                                                                                                                                                                                                                                                                                                      |
|         | $R_2^2(20)$ | (NH)N1-H12...O1 <sub>(C=O_COOH)</sub> & (NH3+)N2-H23...O4 <sub>(COO-)</sub>                                                                                                                                                                                                                                                                                                                                                                                                                                                                                                                                                                                                                                                                                                                                                                                                                                          |
|         | $R_2^3(16)$ | (CH2)C8-H8...O1 <sub>(C=O_COOH)</sub> & (CH2cycl)C17-H24...O5 <sub>(COO-)</sub>                                                                                                                                                                                                                                                                                                                                                                                                                                                                                                                                                                                                                                                                                                                                                                                                                                      |
|         | $R_2^3(17)$ | (CH2)C7-H7...O1 <sub>(C=O_COOH)</sub> & (CH2cycl)C17-H24...O5 <sub>(COO-)</sub>                                                                                                                                                                                                                                                                                                                                                                                                                                                                                                                                                                                                                                                                                                                                                                                                                                      |
|         | $R_2^3(18)$ | (NH3+)N2-H22...O4 <sub>(COO-)</sub> & (NH3+)N2-H23...O4 <sub>(COO-)</sub>                                                                                                                                                                                                                                                                                                                                                                                                                                                                                                                                                                                                                                                                                                                                                                                                                                            |
|         | $R_2^3(19)$ | (NH)N1-H12...O1 <sub>(C=O_COOH)</sub> & (CH2cycl)C17-H25...O1 <sub>(C=O_COOH)</sub>                                                                                                                                                                                                                                                                                                                                                                                                                                                                                                                                                                                                                                                                                                                                                                                                                                  |
|         | $R_2^3(20)$ | (CH2)C8-H8...O1 <sub>(C=O_COOH)</sub> & (CH2cycl)C17-H25...O1 <sub>(C=O_COOH)</sub>                                                                                                                                                                                                                                                                                                                                                                                                                                                                                                                                                                                                                                                                                                                                                                                                                                  |
|         | $R_3^2(11)$ | (CH2)C7-H7...O1 <sub>(C=O_COOH)</sub> & (CH2cycl)C17-H25...O1 <sub>(C=O_COOH)</sub>                                                                                                                                                                                                                                                                                                                                                                                                                                                                                                                                                                                                                                                                                                                                                                                                                                  |
|         | $R_3^3(11)$ | (OH_COOH)O2-H11...O2 <sub>(OH_COOH)</sub> & (NH)N1-H12...O1 <sub>(C=O_COOH)</sub>                                                                                                                                                                                                                                                                                                                                                                                                                                                                                                                                                                                                                                                                                                                                                                                                                                    |

|                |             |                                                                                                                                                                                                                                                                                                                                                                  |
|----------------|-------------|------------------------------------------------------------------------------------------------------------------------------------------------------------------------------------------------------------------------------------------------------------------------------------------------------------------------------------------------------------------|
|                |             | * $(_{(OH\_COOH)}O2-H11 \cdots O2_{(OH\_COOH)})_2$ & $(_{(CH2)}C8-H8 \cdots O1_{(C=O\_COOH)})$                                                                                                                                                                                                                                                                   |
|                | $R^3_3(12)$ | $(_{(OH\_COOH)}O2-H11 \cdots O2_{(OH\_COOH)})_2$ & $(_{(CH2)}C7-H7 \cdots O1_{(C=O\_COOH)})$                                                                                                                                                                                                                                                                     |
|                | $R^3_3(19)$ | $(_{(NH)}N1-H12 \cdots O1_{(C=O\_COOH)})$ & $(_{(CH2cycl)}C17-H25 \cdots O1_{(C=O\_COOH)})_2$                                                                                                                                                                                                                                                                    |
|                | $R^4_4(18)$ | * $(_{(OH\_COOH)}O2-H11 \cdots O2_{(OH\_COOH)})_2$ & $(_{(NH)}N1-H12 \cdots O1_{(C=O\_COOH)})_2$<br>* $(_{(OH\_COOH)}O2-H11 \cdots O2_{(OH\_COOH)})_2$ & $(_{(CH2)}C8-H8 \cdots O1_{(C=O\_COOH)})_2$<br>* $(_{(OH\_COOH)}O2-H11 \cdots O2_{(OH\_COOH)})_2$ & $(_{(CH2)}C13-H16 \cdots O3_{(C=O)})$                                                               |
|                | $R^4_4(20)$ | $(_{(CH2)}C7-H7 \cdots O1_{(C=O\_COOH)})_2$ & $(_{(OH\_COOH)}O2-H11 \cdots O2_{(OH\_COOH)})_2$                                                                                                                                                                                                                                                                   |
| <b>MCPRL01</b> | $C(6)$      | * $(_{(CH2cycl)}C5-H7 \cdots O2_{(C=O\_COOH)})$<br>* $(_{(CH2cycl)}C5-H8 \cdots O2_{(C=O\_COOH)})$                                                                                                                                                                                                                                                               |
|                | $C(7)$      | * $(_{(OH\_COOH)}O1-H1 \cdots O3_{(C=O)})$<br>* $(_{(CHcycl)}C2-H2 \cdots S1)$                                                                                                                                                                                                                                                                                   |
|                | $C(8)$      | $(_{(CH2)}C8-H11 \cdots O1_{(OH\_COOH)})$                                                                                                                                                                                                                                                                                                                        |
|                | $C(9)$      | $S1-H15 \cdots O2_{(C=O\_COOH)}$                                                                                                                                                                                                                                                                                                                                 |
| <i>level 2</i> | $C^1_2(4)$  | $(_{(CH2cycl)}C5-H7 \cdots O2_{(C=O\_COOH)})$ & $(_{(CH2cycl)}C5-H8 \cdots O2_{(C=O\_COOH)})$                                                                                                                                                                                                                                                                    |
|                | $C^1_2(9)$  | $(_{(CH2cycl)}C5-H7 \cdots O2_{(C=O\_COOH)})$ & $S1-H15 \cdots O2_{(C=O\_COOH)}$                                                                                                                                                                                                                                                                                 |
|                | $C^2_2(6)$  | $(_{(CHcycl)}C2-H2 \cdots S1)$ & $S1-H15 \cdots O2_{(C=O\_COOH)}$                                                                                                                                                                                                                                                                                                |
|                | $C^2_2(7)$  | * $(_{(CHcycl)}C2-H2 \cdots S1)$ & $(_{(CH2)}C8-H11 \cdots O1_{(OH\_COOH)})$<br>* $(_{(CH2)}C8-H11 \cdots O1_{(OH\_COOH)})$ & $S1-H15 \cdots O2_{(C=O\_COOH)}$                                                                                                                                                                                                   |
|                | $C^2_2(9)$  | * $(_{(OH\_COOH)}O1-H1 \cdots O3_{(C=O)})$ & $(_{(CH2cycl)}C5-H7 \cdots O2_{(C=O\_COOH)})$<br>* $(_{(OH\_COOH)}O1-H1 \cdots O3_{(C=O)})$ & $(_{(CH2cycl)}C5-H8 \cdots O2_{(C=O\_COOH)})$                                                                                                                                                                         |
|                | $C^2_2(10)$ | * $(_{(OH\_COOH)}O1-H1 \cdots O3_{(C=O)})$ & $(_{(CHcycl)}C2-H2 \cdots S1)$<br>* $(_{(OH\_COOH)}O1-H1 \cdots O3_{(C=O)})$ & $S1-H15 \cdots O2_{(C=O\_COOH)}$<br>* $(_{(CH2cycl)}C5-H7 \cdots O2_{(C=O\_COOH)})$ & $(_{(CH2)}C8-H11 \cdots O1_{(OH\_COOH)})$<br>* $(_{(CH2cycl)}C5-H8 \cdots O2_{(C=O\_COOH)})$ & $(_{(CH2)}C8-H11 \cdots O1_{(OH\_COOH)})$       |
|                | $C^2_2(11)$ | * $(_{(CHcycl)}C2-H2 \cdots S1)$ & $(_{(CH2cycl)}C5-H7 \cdots O2_{(C=O\_COOH)})$<br>* $(_{(CHcycl)}C2-H2 \cdots S1)$ & $(_{(CH2cycl)}C5-H8 \cdots O2_{(C=O\_COOH)})$                                                                                                                                                                                             |
|                | $C^2_2(12)$ | $(_{(CH2cycl)}C5-H7 \cdots O2_{(C=O\_COOH)})$ & $(_{(CH2cycl)}C5-H8 \cdots O2_{(C=O\_COOH)})$                                                                                                                                                                                                                                                                    |
|                | $C^2_2(13)$ | * $(_{(OH\_COOH)}O1-H1 \cdots O3_{(C=O)})$ & $(_{(CH2cycl)}C5-H7 \cdots O2_{(C=O\_COOH)})$<br>* $(_{(OH\_COOH)}O1-H1 \cdots O3_{(C=O)})$ & $(_{(CH2cycl)}C5-H8 \cdots O2_{(C=O\_COOH)})$<br>* $(_{(CHcycl)}C2-H2 \cdots S1)$ & $(_{(CH2cycl)}C5-H7 \cdots O2_{(C=O\_COOH)})$<br>* $(_{(CHcycl)}C2-H2 \cdots S1)$ & $(_{(CH2cycl)}C5-H8 \cdots O2_{(C=O\_COOH)})$ |
|                | $C^2_2(14)$ | * $(_{(OH\_COOH)}O1-H1 \cdots O3_{(C=O)})$ & $(_{(CHcycl)}C2-H2 \cdots S1)$<br>* $(_{(CH2cycl)}C5-H7 \cdots O2_{(C=O\_COOH)})$ & $(_{(CH2)}C8-H11 \cdots O1_{(OH\_COOH)})$<br>* $(_{(CH2cycl)}C5-H7 \cdots O2_{(C=O\_COOH)})$ & $S1-H15 \cdots O2_{(C=O\_COOH)}$<br>* $(_{(CH2cycl)}C5-H8 \cdots O2_{(C=O\_COOH)})$ & $(_{(CH2)}C8-H11 \cdots O1_{(OH\_COOH)})$  |
|                | $C^2_2(15)$ | * $(_{(OH\_COOH)}O1-H1 \cdots O3_{(C=O)})$ & $(_{(CH2)}C8-H11 \cdots O1_{(OH\_COOH)})$<br>* $(_{(CHcycl)}C2-H2 \cdots S1)$ & $(_{(CH2)}C8-H11 \cdots O1_{(OH\_COOH)})$<br>* $(_{(CH2cycl)}C5-H8 \cdots O2_{(C=O\_COOH)})$ & $S1-H15 \cdots O2_{(C=O\_COOH)}$                                                                                                     |
|                | $C^2_2(16)$ | * $(_{(OH\_COOH)}O1-H1 \cdots O3_{(C=O)})$ & $S1-H15 \cdots O2_{(C=O\_COOH)}$<br>* $(_{(CHcycl)}C2-H2 \cdots S1)$ & $S1-H15 \cdots O2_{(C=O\_COOH)}$                                                                                                                                                                                                             |
|                | $C^2_2(17)$ | $(_{(CH2)}C8-H11 \cdots O1_{(OH\_COOH)})$ & $S1-H13 \cdots O2_{(C=O\_COOH)}$                                                                                                                                                                                                                                                                                     |
|                | $R^1_2(9)$  | $(_{(CH2cycl)}C5-H8 \cdots O2_{(C=O\_COOH)})$ & $S1-H15 \cdots O2_{(C=O\_COOH)}$                                                                                                                                                                                                                                                                                 |
|                | $R^2_2(7)$  | $(_{(OH\_COOH)}O1-H1 \cdots O3_{(C=O)})$ & $(_{(CH2)}C8-H11 \cdots O1_{(OH\_COOH)})$                                                                                                                                                                                                                                                                             |
|                | $R^2_3(10)$ | $(_{(CH2cycl)}C5-H7 \cdots O2_{(C=O\_COOH)})_2$ & $(_{(CH2cycl)}C5-H8 \cdots O2_{(C=O\_COOH)})$                                                                                                                                                                                                                                                                  |
|                | $R^2_3(15)$ | $(_{(CH2cycl)}C5-H7 \cdots O2_{(C=O\_COOH)})_2$ & $S1-H15 \cdots O2_{(C=O\_COOH)}$                                                                                                                                                                                                                                                                               |
|                | $R^3_4(16)$ | $(_{(CH2cycl)}C5-H7 \cdots O2_{(C=O\_COOH)})_2$ & $(_{(CH2cycl)}C5-H8 \cdots O2_{(C=O\_COOH)})$                                                                                                                                                                                                                                                                  |
| <b>YOZTIS</b>  | $C(4)$      | $(_{(CH2)}C6-H8 \cdots S1)$                                                                                                                                                                                                                                                                                                                                      |
|                | $C(6)$      | * $(_{(CH2)}C13-H16 \cdots O5_{(C=O)})$<br>* $(_{(CH2cycl)}C16-H23 \cdots O3_{(C=O\_COOH)})$                                                                                                                                                                                                                                                                     |
|                | $C(7)$      | * $(_{(OH\_COOH)}O1-H1 \cdots O4_{(C=O)})$<br>* $(_{(OH\_COOH)}O2-H2 \cdots O5_{(C=O)})$                                                                                                                                                                                                                                                                         |
|                | $C(8)$      | * $(_{(CHcycl)}C2-H3 \cdots S2)$<br>* $(_{(CH2)}C5-H6 \cdots O3_{(C=O\_COOH)})$<br>* $(_{(CH3)}C11-H11 \cdots O3_{(C=O\_COOH)})$<br>* $(_{(CH2)}C12-H14 \cdots S2)$                                                                                                                                                                                              |
|                | $C(10)$     | $(_{(CH3)}C15-H21 \cdots O4_{(C=O)})$                                                                                                                                                                                                                                                                                                                            |
| <i>level 2</i> | $C^1_2(8)$  | * $(_{(OH\_COOH)}O2-H2 \cdots O5_{(C=O)})$ & $(_{(CH2cycl)}C18-H16 \cdots O5_{(C=O)})$<br>* $(_{(CH2)}C5-H6 \cdots O3_{(C=O\_COOH)})$ & $(_{(CH2cycl)}C16-H23 \cdots O3_{(C=O\_COOH)})$<br>* $(_{(CH3)}C11-H11 \cdots O3_{(C=O\_COOH)})$ & $(_{(CH2cycl)}C16-H23 \cdots O3_{(C=O\_COOH)})$                                                                       |
|                | $C^1_2(15)$ | $(_{(OH\_COOH)}O1-H1 \cdots O4_{(C=O)})$ & $(_{(CH3)}C15-H21 \cdots O4_{(C=O)})$                                                                                                                                                                                                                                                                                 |
|                | $C^1_2(16)$ | $(_{(CHcycl)}C2-H3 \cdots S2)$ & $(_{(CH2)}C12-H14 \cdots S2)$                                                                                                                                                                                                                                                                                                   |

|  |             |                                                                                                                                                                                                                                                                                                                                                                                                                                                                                                                                                                                                                                                                                                                                                                                                                                                                                                                                                     |
|--|-------------|-----------------------------------------------------------------------------------------------------------------------------------------------------------------------------------------------------------------------------------------------------------------------------------------------------------------------------------------------------------------------------------------------------------------------------------------------------------------------------------------------------------------------------------------------------------------------------------------------------------------------------------------------------------------------------------------------------------------------------------------------------------------------------------------------------------------------------------------------------------------------------------------------------------------------------------------------------|
|  | $C_2^2(8)$  | (CH <sub>2</sub> )C2-H3...S2 & (CH <sub>2</sub> )C5-H6...O3 <sub>(C=O,COOH)</sub>                                                                                                                                                                                                                                                                                                                                                                                                                                                                                                                                                                                                                                                                                                                                                                                                                                                                   |
|  | $C_2^2(9)$  | * <sub>(OH,COOH)</sub> O1-H1...O4 <sub>(C=O)</sub> & (CH <sub>2</sub> )C16-H23...O3 <sub>(C=O,COOH)</sub><br>* <sub>(CH<sub>2</sub>)</sub> C12-H14...S2 & (CH <sub>2</sub> )C13-H19...O5 <sub>(C=O)</sub>                                                                                                                                                                                                                                                                                                                                                                                                                                                                                                                                                                                                                                                                                                                                           |
|  | $C_2^2(10)$ | * <sub>(CH<sub>2</sub>)</sub> C2-H3...S2 & (CH <sub>3</sub> )C11-H11...O3 <sub>(C=O,COOH)</sub><br>* <sub>(CH<sub>2</sub>)</sub> C2-H3...S2 & (CH <sub>3</sub> )C15-H21...O4 <sub>(C=O)</sub><br>* <sub>(CH<sub>2</sub>)</sub> C6-H8...S1 & (CH <sub>2</sub> )C12-H14...S2<br>* <sub>(CH<sub>2</sub>)</sub> C6-H8...S1 & (CH <sub>3</sub> )C15-H21...O4 <sub>(C=O)</sub>                                                                                                                                                                                                                                                                                                                                                                                                                                                                                                                                                                            |
|  | $C_2^2(11)$ | * <sub>(OH,COOH)</sub> O1-H1...O4 <sub>(C=O)</sub> & (CH <sub>2</sub> )C2-H3...S2<br>* <sub>(OH,COOH)</sub> O2-H2...O5 <sub>(C=O)</sub> & (CH <sub>2</sub> )C12-H14...S2                                                                                                                                                                                                                                                                                                                                                                                                                                                                                                                                                                                                                                                                                                                                                                            |
|  | $C_2^2(12)$ | * <sub>(C=O,COOH)</sub> O6-H8...S1 & (CH <sub>2</sub> )C2-H3...S2<br>* <sub>(CH<sub>2</sub>)</sub> C6-H8...S1 & (CH <sub>2</sub> )C12-H14...S2                                                                                                                                                                                                                                                                                                                                                                                                                                                                                                                                                                                                                                                                                                                                                                                                      |
|  | $C_2^2(13)$ | * <sub>(OH,COOH)</sub> O1-H1...O4 <sub>(C=O)</sub> & (CH <sub>2</sub> )C16-H23...O3 <sub>(C=O,COOH)</sub><br>* <sub>(OH,COOH)</sub> O2-H2...O5 <sub>(C=O)</sub> & (CH <sub>2</sub> )C18-H16...O5 <sub>(C=O)</sub>                                                                                                                                                                                                                                                                                                                                                                                                                                                                                                                                                                                                                                                                                                                                   |
|  | $C_2^2(14)$ | * <sub>(CH<sub>2</sub>)</sub> C2-H3...S2 & (CH <sub>2</sub> )C16-H23...O3 <sub>(C=O,COOH)</sub><br>* <sub>(CH<sub>2</sub>)</sub> C5-H6...O3 <sub>(C=O,COOH)</sub> & (CH <sub>2</sub> )C6-H8...S1<br>* <sub>(CH<sub>2</sub>)</sub> C5-H6...O3 <sub>(C=O,COOH)</sub> & (CH <sub>3</sub> )C15-H21...O4 <sub>(C=O)</sub><br>* <sub>(CH<sub>2</sub>)</sub> C5-H6...O3 <sub>(C=O,COOH)</sub> & (CH <sub>2</sub> )C16-H23...O3 <sub>(C=O,COOH)</sub><br>* <sub>(CH<sub>2</sub>)</sub> C6-H8...S1 & (CH <sub>2</sub> )C13-H16...O5 <sub>(C=O)</sub><br>* <sub>(CH<sub>2</sub>)</sub> C6-H8...S1 & (CH <sub>3</sub> )C15-H21...O4 <sub>(C=O)</sub><br>* <sub>(CH<sub>3</sub>)</sub> C11-H11...O3 <sub>(C=O,COOH)</sub> & (CH <sub>2</sub> )C16-H23...O3 <sub>(C=O,COOH)</sub><br>* <sub>(CH<sub>2</sub>)</sub> C13-H16...O5 <sub>(C=O)</sub> & (CH <sub>2</sub> )C12-H14...S2<br>* <sub>(CH<sub>3</sub>)</sub> C15-H21...O4 & (CH <sub>2</sub> )C12-H14...S2 |
|  |             | * <sub>(OH,COOH)</sub> O1-H1...O4 <sub>(C=O)</sub> & (CH <sub>2</sub> )C2-H3...S2<br>* <sub>(OH,COOH)</sub> O1-H1...O4 <sub>(C=O)</sub> & (CH <sub>2</sub> )C5-H6...O3 <sub>(C=O,COOH)</sub><br>* <sub>(OH,COOH)</sub> O1-H1...O4 <sub>(C=O)</sub> & (CH <sub>3</sub> )C11-H11...O3 <sub>(C=O,COOH)</sub><br>* <sub>(OH,COOH)</sub> O2-H2...O5 <sub>(C=O)</sub> & (CH <sub>2</sub> )C6-H8...S1<br>* <sub>(OH,COOH)</sub> O2-H2...O5 <sub>(C=O)</sub> & (CH <sub>2</sub> )C12-H14...S2                                                                                                                                                                                                                                                                                                                                                                                                                                                               |
|  | $C_2^2(16)$ | * <sub>(CH<sub>2</sub>)</sub> C2-H3...S2 & (CH <sub>2</sub> )C5-H6...O3 <sub>(C=O,COOH)</sub><br>* <sub>(CH<sub>2</sub>)</sub> C2-H3...S2 & (CH <sub>2</sub> )C12-H14...S2<br>* <sub>(CH<sub>2</sub>)</sub> C2-H3...S2 & (CH <sub>3</sub> )C11-H11...O3 <sub>(C=O,COOH)</sub><br>* <sub>(CH<sub>2</sub>)</sub> C5-H6...O3 <sub>(C=O,COOH)</sub> & (CH <sub>3</sub> )C11-H11...O3 <sub>(C=O,COOH)</sub><br>* <sub>(CH<sub>2</sub>)</sub> C6-H8...S1 & C11-H11...O3 <sub>(C=O,COOH)</sub><br>* <sub>(CH<sub>3</sub>)</sub> C11-H11...O3 <sub>(C=O,COOH)</sub> & (CH <sub>3</sub> )C15-H21...O4 <sub>(C=O)</sub>                                                                                                                                                                                                                                                                                                                                       |
|  | $C_2^2(17)$ | * <sub>(OH,COOH)</sub> O1-H1...O4 <sub>(C=O)</sub> & (CH <sub>2</sub> )C6-H8...S1<br>* <sub>(OH,COOH)</sub> O1-H1...O4 <sub>(C=O)</sub> & (CH <sub>3</sub> )C15-H21...O4 <sub>(C=O)</sub>                                                                                                                                                                                                                                                                                                                                                                                                                                                                                                                                                                                                                                                                                                                                                           |
|  | $C_2^2(18)$ | * <sub>(CH<sub>2</sub>)</sub> C2-H3...S2 & (CH <sub>3</sub> )C15-H21...O4 <sub>(C=O)</sub><br>* <sub>(CH<sub>2</sub>)</sub> C5-H6...O3 <sub>(C=O,COOH)</sub> & (CH <sub>3</sub> )C15-H21...O4 <sub>(C=O)</sub><br>* <sub>(CH<sub>2</sub>)</sub> C6-H8...S1 & C16-H23...O3 <sub>(C=O,COOH)</sub><br>* <sub>(CH<sub>3</sub>)</sub> C11-H11...O3 <sub>(C=O,COOH)</sub> & (CH <sub>3</sub> )C15-H21...O4 <sub>(C=O)</sub><br>* <sub>(CH<sub>2</sub>)</sub> C12-H14...S2 & (CH <sub>3</sub> )C15-H21...O4 <sub>(C=O)</sub><br>* <sub>(CH<sub>2</sub>)</sub> C13-H16...O5 <sub>(C=O)</sub> & (CH <sub>3</sub> )C15-H21...O4 <sub>(C=O)</sub><br>* <sub>(CH<sub>2</sub>)</sub> C16-H23...O3 <sub>(C=O,COOH)</sub> & (CH <sub>3</sub> )C15-H21...O4 <sub>(C=O)</sub>                                                                                                                                                                                        |
|  | $C_2^2(19)$ | (OH,COOH)O2-H2...O5 <sub>(C=O)</sub> & (CH <sub>3</sub> )C15-H21...O4 <sub>(C=O)</sub>                                                                                                                                                                                                                                                                                                                                                                                                                                                                                                                                                                                                                                                                                                                                                                                                                                                              |
|  | $C_2^2(20)$ | * <sub>(CH<sub>2</sub>)</sub> C2-H3...S2 & (CH <sub>2</sub> )C13-H16...O5 <sub>(C=O)</sub><br>* <sub>(CH<sub>2</sub>)</sub> C5-H6...O3 <sub>(C=O,COOH)</sub> & (CH <sub>2</sub> )C12-H14...S2                                                                                                                                                                                                                                                                                                                                                                                                                                                                                                                                                                                                                                                                                                                                                       |
|  | $R_2^1(6)$  | (CH <sub>2</sub> )C5-H6...O3 <sub>(C=O,COOH)</sub> & (CH <sub>3</sub> )C11-H11...O3 <sub>(C=O,COOH)</sub>                                                                                                                                                                                                                                                                                                                                                                                                                                                                                                                                                                                                                                                                                                                                                                                                                                           |
|  | $R_2^2(9)$  | * <sub>(OH,COOH)</sub> O1-H1...O4 <sub>(C=O)</sub> & (CH <sub>2</sub> )C5-H6...O3 <sub>(C=O,COOH)</sub><br>* <sub>(OH,COOH)</sub> O1-H1...O4 <sub>(C=O)</sub> & (CH <sub>3</sub> )C11-H11...O3 <sub>(C=O,COOH)</sub>                                                                                                                                                                                                                                                                                                                                                                                                                                                                                                                                                                                                                                                                                                                                |
|  | $R_2^2(10)$ | (C=O,COOH)O6-H8...S1 & (CH <sub>2</sub> )C2-H3...S2                                                                                                                                                                                                                                                                                                                                                                                                                                                                                                                                                                                                                                                                                                                                                                                                                                                                                                 |
|  | $R_2^2(12)$ | (CH <sub>2</sub> )C2-H3...S2 & C16-H23...O3 <sub>(C=O,COOH)</sub>                                                                                                                                                                                                                                                                                                                                                                                                                                                                                                                                                                                                                                                                                                                                                                                                                                                                                   |
|  | $R_2^2(14)$ | (CH <sub>2</sub> )C6-H8...S1 & (CH <sub>2</sub> )C13-H16...O5 <sub>(C=O)</sub>                                                                                                                                                                                                                                                                                                                                                                                                                                                                                                                                                                                                                                                                                                                                                                                                                                                                      |
|  | $R_2^2(18)$ | (CH <sub>2</sub> )C6-H8...S1 & (CH <sub>2</sub> )C16-H23...O3 <sub>(C=O,COOH)</sub>                                                                                                                                                                                                                                                                                                                                                                                                                                                                                                                                                                                                                                                                                                                                                                                                                                                                 |
|  | $R_2^2(20)$ | (CH <sub>2</sub> )C2-H3...S2 & (CH <sub>2</sub> )C13-H16...O5 <sub>(C=O)</sub>                                                                                                                                                                                                                                                                                                                                                                                                                                                                                                                                                                                                                                                                                                                                                                                                                                                                      |

#### Other modified proline-based ACEI

|         |             |                                                                                                                      |
|---------|-------------|----------------------------------------------------------------------------------------------------------------------|
| QQQWAW  | $S(8)$      | (CH <sub>2</sub> )C17-H26...O3 <sub>(C=O)</sub>                                                                      |
|         | $S(10)$     | (CH <sub>2</sub> )C16-H25...O2 <sub>(C=O,COOH)</sub>                                                                 |
|         | $C(8)$      | * <sub>(OH,COOH)</sub> O1-H1...N2 <sub>(NH)</sub><br>* <sub>(CH<sub>3</sub>)</sub> C11-H16...O1 <sub>(OH,COOH)</sub> |
|         | $C(10)$     | (CH <sub>2</sub> )C3-H6...O5 <sub>(C=O)</sub>                                                                        |
| level 2 | $C_2^2(11)$ | (OH,COOH)O1-H1...N2 <sub>(NH)</sub> & (CH <sub>2</sub> )C3-H6...O5 <sub>(C=O)</sub>                                  |
|         | $C_2^2(13)$ | (CH <sub>2</sub> )C3-H6...O5 <sub>(C=O)</sub> & (CH <sub>3</sub> )C11-H16...O1 <sub>(OH,COOH)</sub>                  |
|         | $C_2^2(16)$ | (OH,COOH)O1-H1...N2 <sub>(NH)</sub> & (CH <sub>3</sub> )C11-H16...O1 <sub>(OH,COOH)</sub>                            |



|                |             |                                                                                                                                                                                                                                                                                                                                                                                                                               |
|----------------|-------------|-------------------------------------------------------------------------------------------------------------------------------------------------------------------------------------------------------------------------------------------------------------------------------------------------------------------------------------------------------------------------------------------------------------------------------|
|                | $C_2^2(18)$ | * <sub>(OH,COOH)</sub> O1-H1...N2 <sub>(NH)</sub> & <sub>(CHcycl)</sub> C3-H6...O5 <sub>(C=O)</sub><br>* <sub>(CHcycl)</sub> C3-H6...O5 <sub>(C=O)</sub> & <sub>(CH3)</sub> C11-H16...O1 <sub>(OH,COOH)</sub>                                                                                                                                                                                                                 |
|                | $R_2^2(6)$  | <sub>(OH,COOH)</sub> O1-H1...N2 <sub>(NH)</sub> & <sub>(CH3)</sub> C11-H16...O1 <sub>(OH,COOH)</sub>                                                                                                                                                                                                                                                                                                                          |
| <b>EDALEC</b>  | $C(6)$      | <sub>(OH)</sub> O8-H40...O6 <sub>(OH)</sub><br><sub>(CH2)</sub> C11-H12...N1 <sub>(NH)</sub>                                                                                                                                                                                                                                                                                                                                  |
|                | $C(15)$     | <sub>(CHcycl)</sub> C3-H3...O4 <sub>(COO-)</sub>                                                                                                                                                                                                                                                                                                                                                                              |
|                | $D(2)$      | * <sub>(CH2cycl)</sub> C18-H23...O7 <sub>(OH)</sub><br>* <sub>(CH2cycl)</sub> C18-H23...O8 <sub>(OH)</sub><br>* <sub>(CH2cycl)</sub> C18-H24...O7 <sub>(OH)</sub><br>* <sub>(CH2cycl)</sub> C19-H25...O7 <sub>(OH)</sub>                                                                                                                                                                                                      |
|                | $S(6)$      | <sub>(CH2cycl)</sub> C17-H22...O3 <sub>(C=O)</sub>                                                                                                                                                                                                                                                                                                                                                                            |
| <i>level 2</i> | $C_1^2(4)$  | <sub>(CH2cycl)</sub> C18-H23...O7 <sub>(OH)</sub> & <sub>(CH2cycl)</sub> C18-H24...O7 <sub>(OH)</sub>                                                                                                                                                                                                                                                                                                                         |
|                | $C_1^2(5)$  | * <sub>(CH2cycl)</sub> C18-H23...O7 <sub>(OH)</sub> & <sub>(CH2cycl)</sub> C19-H25...O7 <sub>(OH)</sub><br>* <sub>(CH2cycl)</sub> C18-H24...O7 <sub>(OH)</sub> & <sub>(CH2cycl)</sub> C19-H25...O7 <sub>(OH)</sub>                                                                                                                                                                                                            |
|                | $C_2^2(8)$  | <sub>(CH2cycl)</sub> C18-H23...O8 <sub>(OH)</sub> & <sub>(CH2cycl)</sub> C18-H24...O7 <sub>(OH)</sub>                                                                                                                                                                                                                                                                                                                         |
|                | $C_2^2(9)$  | <sub>(CH2cycl)</sub> C18-H23...O8 <sub>(OH)</sub> & <sub>(CH2cycl)</sub> C19-H25...O7 <sub>(OH)</sub>                                                                                                                                                                                                                                                                                                                         |
|                | $C_2^2(19)$ | <sub>(CH2cycl)</sub> C11-H12...N1 <sub>(NH)</sub> & <sub>(CHcycl)</sub> C3-H3...O4 <sub>(COO-)</sub>                                                                                                                                                                                                                                                                                                                          |
|                | $R_1^2(6)$  | <sub>(CH2cycl)</sub> C18-H23...O7 <sub>(OH)</sub> & <sub>(CH2cycl)</sub> C18-H23...O8 <sub>(OH)</sub>                                                                                                                                                                                                                                                                                                                         |
|                | $D_3^3(9)$  | <sub>(CH2)</sub> C8-H40...O6 <sub>(OH)</sub> & <sub>(CH2cycl)</sub> C18-H23...O8 <sub>(OH)</sub>                                                                                                                                                                                                                                                                                                                              |
|                | $D_3^3(13)$ | * <sub>(OH)</sub> O8-H40...O6 <sub>(OH)</sub> & <sub>(CH2cycl)</sub> C18-H24...O7 <sub>(OH)</sub> <sub>2</sub><br>* <sub>(OH)</sub> O8-H40...O6 <sub>(OH)</sub> & <sub>(CH2cycl)</sub> C19-H25...O7 <sub>(OH)</sub> <sub>2</sub>                                                                                                                                                                                              |
| <b>FIFGEG</b>  | $D(2)$      | * <sub>(NH)</sub> N2-H24...O6 <sub>(solv)</sub><br>* <sub>(CH3)</sub> C14-H20...O7 <sub>(solv)</sub>                                                                                                                                                                                                                                                                                                                          |
|                | $C(5)$      | <sub>(CH2cycl)</sub> C2-H2...O4 <sub>(COO-)</sub>                                                                                                                                                                                                                                                                                                                                                                             |
|                | $C(8)$      | <sub>(CHcycl)</sub> C21-H26...O3 <sub>(COO-)</sub>                                                                                                                                                                                                                                                                                                                                                                            |
|                | $C(9)$      | <sub>(CH)</sub> C11-H13...O4 <sub>(COO-)</sub>                                                                                                                                                                                                                                                                                                                                                                                |
| <i>level 2</i> | $C_2^2(7)$  | <sub>(CH)</sub> C11-H13...O4 <sub>(COO-)</sub> & <sub>(CHcycl)</sub> C21-H26...O3 <sub>(COO-)</sub>                                                                                                                                                                                                                                                                                                                           |
|                | $C_2^2(14)$ | <sub>(CH2cycl)</sub> C2-H2...O4 <sub>(COO-)</sub> & <sub>(CH)</sub> C11-H13...O4 <sub>(COO-)</sub>                                                                                                                                                                                                                                                                                                                            |
|                | $C_2^2(17)$ | <sub>(CH)</sub> C11-H13...O4 <sub>(COO-)</sub> & <sub>(CHcycl)</sub> C21-H26...O3 <sub>(COO-)</sub>                                                                                                                                                                                                                                                                                                                           |
|                | $R_1^2(10)$ | <sub>(CH2cycl)</sub> C2-H2...O4 <sub>(COO-)</sub> & <sub>(CH)</sub> C11-H13...O4 <sub>(COO-)</sub>                                                                                                                                                                                                                                                                                                                            |
|                | $D_2^2(7)$  | <sub>(NH)</sub> N2-H24...O6 <sub>(solv)</sub> & <sub>(CH3)</sub> C14-H20...O7 <sub>(solv)</sub>                                                                                                                                                                                                                                                                                                                               |
|                | $D_3^3(14)$ | <sub>(NH)</sub> N2-H24...O6 <sub>(solv)</sub> <sub>2</sub> & <sub>(CH)</sub> C11-H13...O4 <sub>(COO-)</sub>                                                                                                                                                                                                                                                                                                                   |
|                | $D_3^3(15)$ | <sub>(NH)</sub> N2-H24...O6 <sub>(solv)</sub> <sub>2</sub> & <sub>(CHcycl)</sub> C21-H26...O3 <sub>(COO-)</sub>                                                                                                                                                                                                                                                                                                               |
|                | $D_3^3(16)$ | <sub>(CH)</sub> C11-H13...O4 <sub>(COO-)</sub> & <sub>(CH3)</sub> C14-H20...O7 <sub>(solv)</sub> <sub>2</sub>                                                                                                                                                                                                                                                                                                                 |
|                | $D_3^3(18)$ | * <sub>(NH)</sub> N2-H24...O6 <sub>(solv)</sub> <sub>2</sub> & <sub>(CH2cycl)</sub> C2-H2...O4 <sub>(COO-)</sub><br>* <sub>(CH2cycl)</sub> C2-H2...O4 <sub>(COO-)</sub> & <sub>(CH3)</sub> C14-H20...O7 <sub>(solv)</sub> <sub>2</sub>                                                                                                                                                                                        |
|                | $D_3^3(19)$ | <sub>(CH3)</sub> C14-H20...O7 <sub>(solv)</sub> <sub>2</sub> & <sub>(CHcycl)</sub> C21-H26...O3 <sub>(COO-)</sub>                                                                                                                                                                                                                                                                                                             |
| <b>IQISAE</b>  | $S(6)$      | <sub>(CH2)</sub> C6-H9...O1 <sub>(C=O)</sub>                                                                                                                                                                                                                                                                                                                                                                                  |
|                | $S(8)$      | <sub>(CH2)</sub> C6-H10...O5 <sub>(C=O)</sub>                                                                                                                                                                                                                                                                                                                                                                                 |
|                | $S(10)$     | <sub>(CH2)</sub> C5-H7...O5 <sub>(C=O)</sub>                                                                                                                                                                                                                                                                                                                                                                                  |
|                | $C(8)$      | <sub>(NH)</sub> N2-H31...O4 <sub>(C=O,COOH)</sub> & <sub>(CH3)</sub> C24-H33...O4 <sub>(C=O,COOH)</sub>                                                                                                                                                                                                                                                                                                                       |
|                | $C(9)$      | <sub>(CHcycl)</sub> C9-H12...O1 <sub>(C=O)</sub>                                                                                                                                                                                                                                                                                                                                                                              |
|                | $C(10)$     | <sub>(CH3)</sub> C4-H5...O5 <sub>(C=O)</sub>                                                                                                                                                                                                                                                                                                                                                                                  |
|                | $C(11)$     | <sub>(CH2)</sub> C15-H21...O1 <sub>(C=O)</sub>                                                                                                                                                                                                                                                                                                                                                                                |
| <i>level 2</i> | $C_1^2(16)$ | <sub>(CHcycl)</sub> C9-H12...O1 <sub>(C=O)</sub> & <sub>(CH2)</sub> C15-H21...O1 <sub>(C=O)</sub>                                                                                                                                                                                                                                                                                                                             |
|                | $C_2^2(13)$ | <sub>(NH)</sub> N2-H31...O4 <sub>(C=O,COOH)</sub> & <sub>(CH2)</sub> C15-H21...O1 <sub>(C=O)</sub>                                                                                                                                                                                                                                                                                                                            |
|                | $C_2^2(14)$ | <sub>(NH)</sub> N2-H31...O4 <sub>(C=O,COOH)</sub> & <sub>(CH3)</sub> C4-H5...O5 <sub>(C=O)</sub>                                                                                                                                                                                                                                                                                                                              |
|                | $C_2^2(15)$ | <sub>(CH2)</sub> C5-H21...O1 <sub>(C=O)</sub> & <sub>(CH3)</sub> C24-H33...O4 <sub>(C=O,COOH)</sub>                                                                                                                                                                                                                                                                                                                           |
|                | $C_2^2(16)$ | * <sub>(NH)</sub> N2-H31...O4 <sub>(C=O,COOH)</sub> & <sub>(CH3)</sub> C24-H33...O4 <sub>(C=O,COOH)</sub><br>* <sub>(CH3)</sub> C4-H5...O5 <sub>(C=O)</sub> & <sub>(CH3)</sub> C24-H33...O4 <sub>(C=O,COOH)</sub>                                                                                                                                                                                                             |
|                | $C_2^2(17)$ | <sub>(CH3)</sub> C4-H5...O5 <sub>(C=O)</sub> & <sub>(CHcycl)</sub> C9-H12...O1 <sub>(C=O)</sub>                                                                                                                                                                                                                                                                                                                               |
|                | $C_2^2(18)$ | * <sub>(NH)</sub> N2-H31...O4 <sub>(C=O,COOH)</sub> & <sub>(CH3)</sub> C4-H5...O5 <sub>(C=O)</sub><br>* <sub>(CH3)</sub> C4-H5...O5 <sub>(C=O)</sub> & <sub>(CH3)</sub> C24-H33...O4 <sub>(C=O,COOH)</sub>                                                                                                                                                                                                                    |
|                | $C_2^2(19)$ | * <sub>(NH)</sub> N2-H31...O4 <sub>(C=O,COOH)</sub> & <sub>(CHcycl)</sub> C9-H12...O1 <sub>(C=O)</sub><br>* <sub>(NH)</sub> N2-H31...O4 <sub>(C=O,COOH)</sub> & <sub>(CH2)</sub> C15-H21...O1 <sub>(C=O)</sub><br>* <sub>(CH3)</sub> C4-H5...O5 <sub>(C=O)</sub> & <sub>(CHcycl)</sub> C9-H12...O1 <sub>(C=O)</sub><br>* <sub>(CH2)</sub> C15-H21...O1 <sub>(C=O)</sub> & <sub>(CH3)</sub> C24-H33...O4 <sub>(C=O,COOH)</sub> |
|                | $C_2^2(20)$ | <sub>(CHcycl)</sub> C9-H12...O1 <sub>(C=O)</sub> & <sub>(CH2)</sub> C15-H21...O1 <sub>(C=O)</sub>                                                                                                                                                                                                                                                                                                                             |
|                | $R_1^2(6)$  | <sub>(NH)</sub> N2-H31...O4 <sub>(C=O,COOH)</sub> & <sub>(CH3)</sub> C24-H33...O4 <sub>(C=O,COOH)</sub>                                                                                                                                                                                                                                                                                                                       |



|               |                     |                                                                                                                                                                                                                                                                                                                                                                                                                                                                                                                                                         |
|---------------|---------------------|---------------------------------------------------------------------------------------------------------------------------------------------------------------------------------------------------------------------------------------------------------------------------------------------------------------------------------------------------------------------------------------------------------------------------------------------------------------------------------------------------------------------------------------------------------|
|               |                     | * <sub>(NH<sub>2</sub><sup>+</sup>)</sub> N1-H14...O4 <sub>(C=O,COOH)</sub> & <sub>(CH<sub>2</sub>cycl)</sub> C7-H16...O6 <sub>(OH<sub>2</sub>)<sub>2</sub></sub>                                                                                                                                                                                                                                                                                                                                                                                       |
|               | D <sub>3</sub> (16) | * <sub>(OH<sub>2</sub>)</sub> O6-H32...S1) <sub>2</sub> & <sub>(NH<sub>2</sub><sup>+</sup>)</sub> N1-H14...O4 <sub>(C=O,COOH)</sub><br>* <sub>(OH<sub>2</sub>)</sub> O6-H32...S1) <sub>2</sub> & <sub>(CH<sub>3</sub>)</sub> C12-H26...O1 <sub>(C=O)</sub><br>* <sub>(NH<sub>2</sub><sup>+</sup>)</sub> N1-H13...C11) <sub>2</sub> & <sub>(CH<sub>cycl</sub>)</sub> C17-H7...O3 <sub>(C-O-C)</sub><br>* <sub>(CH<sub>2</sub>cycl)</sub> C7-H16...O6 <sub>(OH<sub>2</sub>)<sub>2</sub></sub> & <sub>(CH<sub>3</sub>)</sub> C12-H26...O1 <sub>(C=O)</sub> |
|               | D <sub>3</sub> (18) | * <sub>(OH,COOH)</sub> O5-H15...C11) <sub>2</sub> & <sub>(CH<sub>3</sub>)</sub> C12-H26...O1 <sub>(C=O)</sub><br>* <sub>(CH)</sub> C4-H2...O6 <sub>(OH<sub>2</sub>)<sub>2</sub></sub> & <sub>(CH<sub>cycl</sub>)</sub> C17-H7...O3 <sub>(C-O-C)</sub><br>* <sub>(CH)</sub> C4-H2...C11) <sub>2</sub> & <sub>(CH<sub>cycl</sub>)</sub> C17-H7...O3 <sub>(C-O-C)</sub><br>* <sub>(CH<sub>2</sub>cycl)</sub> C9-H19...C11) <sub>2</sub> & <sub>(CH<sub>3</sub>)</sub> C12-H24...O2 <sub>(C=O)</sub>                                                        |
|               | D <sub>3</sub> (20) | * <sub>(OH<sub>2</sub>)</sub> O6-H32...S1) <sub>2</sub> & <sub>(CH<sub>3</sub>)</sub> C12-H24...O2 <sub>(C=O)</sub><br>* <sub>(CH<sub>2</sub>cycl)</sub> C7-H16...O6 <sub>(OH<sub>2</sub>)<sub>2</sub></sub> & <sub>(CH<sub>cycl</sub>)</sub> C18-H24...O2 <sub>(C=O)</sub>                                                                                                                                                                                                                                                                             |
| <b>TUHMOY</b> | S(6)                | <sub>(CH)</sub> C19-H23...O4 <sub>(Na-O)</sub>                                                                                                                                                                                                                                                                                                                                                                                                                                                                                                          |
| <b>TUHMUE</b> | S(6)                | <sub>(C=O)</sub> O6-H45...O2 <sub>(C-O-Na)</sub>                                                                                                                                                                                                                                                                                                                                                                                                                                                                                                        |
|               | S(9)                | <sub>(CH<sub>2</sub>cycl)</sub> C26-H21...O8 <sub>(C=O)</sub>                                                                                                                                                                                                                                                                                                                                                                                                                                                                                           |
|               | R(4)                | <sub>(CH)</sub> C29-H23...S3                                                                                                                                                                                                                                                                                                                                                                                                                                                                                                                            |
|               | R(7)                | <sub>(CH<sub>3</sub>)</sub> C9-H10...O4 <sub>(C=O)</sub>                                                                                                                                                                                                                                                                                                                                                                                                                                                                                                |
|               | C(14)               | <sub>(CH)</sub> C13-H14...O6 <sub>(C=O)</sub>                                                                                                                                                                                                                                                                                                                                                                                                                                                                                                           |
|               | C(15)               | <sub>(CH)</sub> C36-H31...O2 <sub>(C-O-Na)</sub>                                                                                                                                                                                                                                                                                                                                                                                                                                                                                                        |

**Table S21.** Perindopril *tert*-butylamine impurities.

| Impurity           | Chemical name                                                                                                                                                    | Structural formula                                                                                 |
|--------------------|------------------------------------------------------------------------------------------------------------------------------------------------------------------|----------------------------------------------------------------------------------------------------|
| <b>A</b>           | (2 <i>S</i> ,3 <i>aS</i> ,7 <i>aS</i> )-octahydro-1 <i>H</i> -indole-2-carboxylic acid                                                                           | 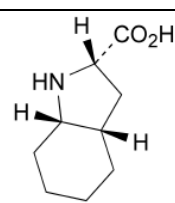              |
| <b>B</b><br>perlat | 2 <i>S</i> ,3 <i>aS</i> ,7 <i>aS</i> -1-[(2 <i>S</i> )-2-[[ <i>(1S)</i> ]-1-carboxybutyl]amino]propanoyl]octahydro-1 <i>H</i> -indole-2-carboxylic acid          | <br><b>R=H</b> |
| <b>C</b>           | 2 <i>S</i> )-2-[(3 <i>S</i> ,5 <i>aS</i> ,9 <i>aS</i> ,10 <i>aS</i> )-3-methyl-1,4-dioxodecahydropyrazino[1,2- <i>a</i> ]indol-2( <i>1H</i> )-yl]pentanoic acid  | <br><b>R=H</b> |
| <b>D</b>           | (2 <i>S</i> )-2-[(3 <i>S</i> ,5 <i>aS</i> ,9 <i>aS</i> ,10 <i>aR</i> )-3-methyl-1,4-dioxodecahydropyrazino[1,2- <i>a</i> ]indol-2( <i>1H</i> )-yl]pentanoic acid |                |
| <b>E</b>           | (2 <i>S</i> ,3 <i>aS</i> ,7 <i>aS</i> )-1-[(2 <i>S</i> )-2-[[ <i>(1S)</i> ]-1-[(1-methylethoxy)carbonyl]butyl]amino]propanoyl]octahydro-1 <i>H</i> -indole-      | ~B                                                                                                 |

|          |                                                                                                                                                                                                      |    |                                                |
|----------|------------------------------------------------------------------------------------------------------------------------------------------------------------------------------------------------------|----|------------------------------------------------|
|          | 2-carboxylic acid                                                                                                                                                                                    |    | $R = \text{CH}(\text{CH}_3)_2$                 |
| <b>F</b> | ethyl (2 <i>S</i> )-2-[(3 <i>S</i> ,5 <i>aS</i> ,9 <i>aS</i> ,10 <i>aS</i> )-3-methyl-1,4-dioxodecahydropyrazino[1,2- <i>a</i> ]indol-2(1 <i>H</i> )-yl]pentanoate                                   | ~C |                                                |
| <b>G</b> | (2 <i>S</i> ,3 <i>aS</i> ,7 <i>aS</i> )-1-[(2 <i>S</i> )-2-[(5 <i>RS</i> )-3-cyclohexyl-2,4-dioxo-5-propylimidazolidin-1-yl]propanoyl]octahydro-1 <i>H</i> -indole-2-carboxylic acid,                |    | $R = \text{C}_2\text{H}_5$<br>and epimer at C* |
| <b>H</b> | (2 <i>S</i> ,3 <i>aS</i> ,7 <i>aS</i> )-1-[(2 <i>S</i> )-2-[(5 <i>RS</i> )-3-cyclohexyl-2-(cyclohexylimino)-4-oxo-5-propylimidazolidin-1-yl]propanoyl]octahydro-1 <i>H</i> -indole-2-carboxylic acid |    | and epimer at C*                               |
| <b>I</b> | (2 <i>S</i> ,3 <i>aS</i> ,7 <i>aS</i> )-1-[(2 <i>S</i> )-2-[(1 <i>R</i> )-1-(ethoxycarbonyl)butyl]amino]propanoyl]octahydro-1 <i>H</i> -indole-2-carboxylic acid                                     |    |                                                |
| <b>J</b> | (2 <i>S</i> ,3 <i>aS</i> ,7 <i>aS</i> )-1-[(2 <i>S</i> )-2-aminopropanoyl]octahydro-1 <i>H</i> -indole-2-carboxylic acid                                                                             |    |                                                |
| <b>K</b> | (3 <i>S</i> ,5 <i>aS</i> ,9 <i>aS</i> ,10 <i>aS</i> )-3-methyldecahydropyrazino[1,2- <i>a</i> ]indole-1,4-dione                                                                                      |    |                                                |
| <b>L</b> | (2 <i>S</i> ,3 <i>aS</i> ,7 <i>aS</i> )-1-acetyloctahydro-1 <i>H</i> -indole-2-carboxylic acid                                                                                                       |    |                                                |
| <b>M</b> | (2 <i>S</i> ,3 <i>aS</i> ,7 <i>aS</i> )-1-[(2 <i>S</i> )-2-[(1 <i>S</i> )-1-(methoxycarbonyl)butyl]amino]propanoyl]octahydro-1 <i>H</i> -indole-2-carboxylic acid                                    |    |                                                |
| <b>N</b> | (2 <i>S</i> )-3-cyclohexyl-2-[(2 <i>S</i> )-2-[(1 <i>S</i> )-1-                                                                                                                                      |    |                                                |

(ethoxycarbonyl)butyl]amino]propanoyl]amino]propanoic acid

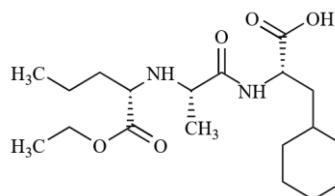

**O** (2S,3aS,7aS)-1-[[[(2S,3aS,7aS)-1-[(2S)-2-[[[(1S)-1-(ethoxycarbonyl)butyl]amino]propanoyl]octahydro-1H-indol-2-yl]carbonyl]octahydro-1H-indole-2-carboxylic acid

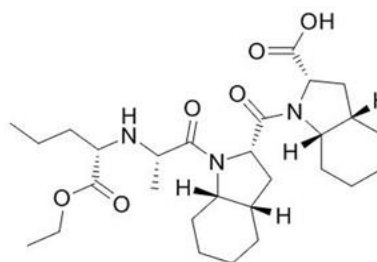

**P** 1-((1-ethoxy-1-oxopentan-2-yl)alanyl)octahydro-1H-indole-2-carboxylic acid

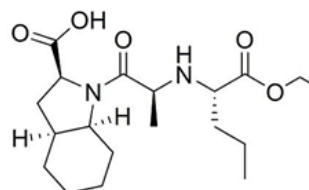

**Table S22.** ADMET parameters for perindopril-derived compounds.

|                                                                 | FEFKEI | BECWIR | IVEGIA | UZOVAH03 | Perindopril arginine |
|-----------------------------------------------------------------|--------|--------|--------|----------|----------------------|
| <b>Absorption</b>                                               |        |        |        |          |                      |
| Water solubility (log mol/l)                                    | -1.942 | -2.325 | -2.964 | -2.735   | -2.835               |
| CacO <sub>2</sub> permeability (log Papp 10 <sup>-6</sup> cm/s) | -0.21  | 0.03   | -0.099 | 0.189    | -0.515               |
| Intestinal absorption (human, % absorbed)                       | 15.219 | 35.618 | 30.149 | 39.969   | 0                    |
| Skin permeability (log Kp)                                      | -2.735 | -2.735 | -2.735 | -2.735   | -2.735               |
| P-glycoprotein substrate                                        | no     | no     | no     | no       | no                   |
| P-glycoprotein I inhibitor                                      | no     | no     | no     | no       | no                   |
| P-glycoprotein II inhibitor                                     | no     | no     | no     | no       | no                   |
| <b>Distribution</b>                                             |        |        |        |          |                      |
| VD <sub>ss</sub> (human, log L/kg)                              | -1.129 | -0.901 | -0.852 | -0.515   | -0.83                |
| Fraction unbound (human, Fu)                                    | 0.736  | 0.775  | 0.792  | 0.752    | 0.612                |
| BBB permeability (log BB)                                       | -0.526 | -0.615 | -0.613 | -0.601   | -1.669               |
| CNS permeability (log PS)                                       | -3.308 | -3.225 | -3.287 | -3.147   | -4.403               |
| <b>Metabolism</b>                                               |        |        |        |          |                      |
| CYP2D6 substrate                                                | no     | no     | no     | no       | yes                  |
| CYP3A4 substrate                                                | no     | no     | yes    | yes      | yes                  |
| CYP1A2 inhibitor                                                | no     | no     | no     | no       | no                   |
| CYP2C19 inhibitor                                               | no     | no     | no     | no       | no                   |
| CYP2C9 inhibitor                                                | no     | no     | no     | no       | no                   |
| CYP2D6 inhibitor                                                | no     | no     | no     | no       | no                   |
| CYP3A4 inhibitor                                                | no     | no     | no     | no       | no                   |
| <b>Excretion</b>                                                |        |        |        |          |                      |
| Total clearance (log ml/min/kg)                                 | 0.766  | 0.742  | 0.816  | 0.889    | 0.543                |
| Renal OCT2 substrate                                            | no     | no     | no     | no       | no                   |
| <b>Toxicity</b>                                                 |        |        |        |          |                      |
| AMES toxicity                                                   | no     | no     | no     | no       | no                   |
| hERG I inhibitor                                                | no     | no     | no     | no       | no                   |
| hERG II inhibitor                                               | no     | no     | no     | no       | no                   |
| hepatotoxicity                                                  | yes    | yes    | yes    | yes      | yes                  |
| Skin sensitization                                              | no     | no     | no     | no       | no                   |

**Table S23.** ADMET parameters of perindopril impurities.

|                                                                 | A      | B      | C/D    | E      | F<br>(BILNAN) | G      | H      | I      | J      |
|-----------------------------------------------------------------|--------|--------|--------|--------|---------------|--------|--------|--------|--------|
| <b>Absorption</b>                                               |        |        |        |        |               |        |        |        |        |
| Water solubility (log mol/l)                                    | -2.389 | -2.11  | -1.478 | -2.365 | -3.895        | -3.036 | -2.892 | -2.19  | -1.172 |
| CacO <sub>2</sub> permeability (log Papp 10 <sup>-6</sup> cm/s) | 1.16   | -0.103 | 0.702  | 0.866  | 1.112         | 0.554  | 0.628  | 0.769  | 0.574  |
| Intestinal absorption (human, % absorbed)                       | 86.024 | 22.064 | 74.728 | 47.545 | 94.961        | 51.724 | 60.316 | 46.184 | 72.555 |
| Skin permeability (log Kp)                                      | -3.161 | -2.735 | -2.735 | -2.735 | -3.67         | -2.735 | -2.735 | -2.735 | -2.735 |



|                                 |               |               |               |               |               |               |               |               |               |
|---------------------------------|---------------|---------------|---------------|---------------|---------------|---------------|---------------|---------------|---------------|
| VDss (human, log L/kg)          | <b>-2.465</b> | <b>-0.612</b> | <b>-1.836</b> | <b>-1.752</b> | <b>-1.832</b> | <b>-1.018</b> | <b>-1.024</b> | <b>-1.298</b> | <b>-1.443</b> |
| Fraction unbound (human, Fu)    | 0.519         | 0.59          | 0.606         | 0.582         | 0.65          | 0.661         | 0.001         | 0.078         | 0.485         |
| BBB permeability (log BB)       | <b>-0.578</b> | <b>-0.979</b> | <b>-0.883</b> | <b>-0.877</b> | <b>-0.306</b> | <b>-0.233</b> | <b>-0.688</b> | -1.015        | -1.252        |
| CNS permeability (log PS)       | -3.963        | -4.107        | -4.311        | -4.088        | -4.745        | -3.081        | <b>-2.713</b> | -3.408        | -3.321        |
| <b>Metabolism</b>               |               |               |               |               |               |               |               |               |               |
| CYP2D6 substrate                | no            | no            | no            | no            | no            | no            | no            | no            | no            |
| CYP3A4 substrate                | no            | <b>yes</b>    | no            | no            | no            | no            | <b>yes</b>    | <b>yes</b>    | no            |
| CYP1A2 inhibitor                | no            | no            | no            | no            | no            | no            | no            | no            | no            |
| CYP2C19 inhibitor               | no            | no            | no            | no            | no            | no            | no            | no            | no            |
| CYP2C9 inhibitor                | no            | no            | no            | no            | no            | no            | no            | no            | no            |
| CYP2D6 inhibitor                | no            | no            | no            | no            | no            | no            | no            | no            | no            |
| CYP3A4 inhibitor                | no            | no            | no            | no            | no            | no            | no            | no            | no            |
| <b>Excretion</b>                |               |               |               |               |               |               |               |               |               |
| Total clearance (log ml/min/kg) | 0.794         | 0.273         | 1.164         | 0.845         | <b>1.213</b>  | 0.306         | <b>-0.598</b> | -0.53         | 0.329         |
| Renal OCT2 substrate            | no            | no            | no            | no            | no            | no            | no            | no            | no            |
| <b>Toxicity</b>                 |               |               |               |               |               |               |               |               |               |
| AMES toxicity                   | no            | no            | no            | no            | no            | no            | no            | no            | no            |
| hERG I inhibitor                | no            | no            | no            | no            | no            | no            | no            | no            | no            |
| hERG II inhibitor               | no            | no            | no            | no            | no            | no            | no            | no            | no            |
| hepatotoxicity                  | <b>yes</b>    | <b>yes</b>    | <b>yes</b>    | <b>yes</b>    | <b>yes</b>    | no            | <b>yes</b>    | <b>yes</b>    | <b>yes</b>    |
| Skin sensitization              | no            | no            | no            | no            | no            | no            | no            | no            | no            |

**Table S25.** ADMET parameters for other modified proline-based ACEI compounds.

|                                                                 | <b>EDALEC</b> | <b>FIFGEG</b> | <b>IQISAE</b> | <b>RUWBAM</b> | <b>QOQWAW</b> |
|-----------------------------------------------------------------|---------------|---------------|---------------|---------------|---------------|
| <b>Absorption</b>                                               |               |               |               |               |               |
| Water solubility (log mol/l)                                    | -2.738        | -2.707        | -2.685        | -2.801        | -2.738        |
| CacO <sub>2</sub> permeability (log Papp 10 <sup>-6</sup> cm/s) | 0.26          | 0.494         | -0.35         | 0.767         | 0.26          |
| Intestinal absorption (human, % absorbed)                       | 50.127        | <b>20.479</b> | <b>8.581</b>  | <b>23.493</b> | 50.127        |
| Skin permeability (log Kp)                                      | <b>-2.735</b> | <b>-2.735</b> | <b>-2.735</b> | <b>-2.735</b> | <b>-2.735</b> |
| P-glycoprotein substrate                                        | <b>yes</b>    | <b>yes</b>    | <b>yes</b>    | <b>yes</b>    | <b>yes</b>    |
| P-glycoprotein I inhibitor                                      | no            | no            | no            | no            | no            |
| P-glycoprotein II inhibitor                                     | no            | no            | no            | no            | no            |
| <b>Distribution</b>                                             |               |               |               |               |               |
| VDss (human, log L/kg)                                          | <b>-0.351</b> | <b>-2.259</b> | <b>-1.045</b> | <b>-0.847</b> | <b>-0.351</b> |
| Fraction unbound (human, Fu)                                    | 0.679         | 0.403         | 0.875         | 0.662         | 0.679         |
| BBB permeability (log BB)                                       | <b>-0.693</b> | -1.29         | -1.047        | <b>-0.334</b> | <b>-0.693</b> |
| CNS permeability (log PS)                                       | -3.032        | -3.445        | -4.485        | -3.993        | -3.092        |
| <b>Metabolism</b>                                               |               |               |               |               |               |
| CYP2D6 substrate                                                | no            | <b>yes</b>    | no            | no            | no            |
| CYP3A4 substrate                                                | <b>yes</b>    | no            | <b>yes</b>    | <b>yes</b>    | <b>yes</b>    |
| CYP1A2 inhibitor                                                | no            | no            | no            | no            | no            |
| CYP2C19 inhibitor                                               | no            | no            | no            | no            | no            |
| CYP2C9 inhibitor                                                | no            | no            | no            | no            | no            |
| CYP2D6 inhibitor                                                | no            | no            | no            | no            | no            |
| CYP3A4 inhibitor                                                | no            | no            | no            | no            | no            |
| <b>Excretion</b>                                                |               |               |               |               |               |
| Total clearance (log ml/min/kg)                                 | 0.752         | <b>0.466</b>  | <b>1.269</b>  | 1.063         | 0.752         |
| Renal OCT2 substrate                                            | no            | no            | no            | no            | no            |
| <b>Toxicity</b>                                                 |               |               |               |               |               |
| AMES toxicity                                                   | no            | no            | no            | no            | no            |
| hERG I inhibitor                                                | no            | no            | no            | no            | no            |
| hERG II inhibitor                                               | no            | no            | no            | no            | no            |
| hepatotoxicity                                                  | <b>yes</b>    | <b>yes</b>    | <b>yes</b>    | <b>yes</b>    | <b>yes</b>    |
| Skin sensitization                                              | no            | no            | no            | no            | no            |

**Table S26.** SwissADME parameters for proline-based and modified-prolinebased ACEI compounds.

**Physicochemical properties**

|        | <i>Mol. weight [g/mol]</i> | <i>No. heavy atoms</i> | <i>No. arom. Heavy atoms</i> | <i>Fraction Csp3</i> | <i>No. rotatable bonds</i> | <i>No. H-bond acceptors</i> | <i>No. H-bond donors</i> | <i>Molar refractivity</i> | <i>TPSA [<math>\text{\AA}^2</math>]</i> | <i>% ABS*</i> |
|--------|----------------------------|------------------------|------------------------------|----------------------|----------------------------|-----------------------------|--------------------------|---------------------------|-----------------------------------------|---------------|
| FEFKEI | 358.43                     | 25                     | 0                            | 0.82                 | 8                          | 6                           | 3                        | 95.32                     | 123.58                                  | 66.36         |
| BECWIR | 418.55                     | 28                     | 0                            | 0.84                 | 8                          | 6                           | 2                        | 112.28                    | 150.63                                  | 57.03         |
| IVEGIA | 477.64                     | 33                     | 0                            | 0.87                 | 10                         | 8                           | 4                        | 131.59                    | 144.87                                  | 59.02         |
| UZOVIP | 459.62                     | 32                     | 0                            | 0.87                 | 10                         | 7                           | 3                        | 128.54                    | 135.64                                  | 62.20         |
| UZOVAH | 441.60                     | 31                     | 0                            | 0.87                 | 10                         | 6                           | 2                        | 125.49                    | 126.41                                  | 65.39         |

|                       |        |    |   |      |    |    |   |        |        |        |
|-----------------------|--------|----|---|------|----|----|---|--------|--------|--------|
| BILNAN01 (impurity F) | 350.45 | 25 | 0 | 0.84 | 6  | 4  | 0 | 102.41 | 66.92  | 85.91  |
| Impurity A            | 169.22 | 12 | 0 | 0.89 | 1  | 3  | 2 | 49.64  | 49.33  | 91.98  |
| Impurity B            | 340.41 | 24 | 0 | 0.82 | 8  | 6  | 3 | 92.96  | 106.94 | 72.10  |
| Impurity C            | 308.37 | 22 | 0 | 0.81 | 4  | 4  | 1 | 88.48  | 77.92  | 82.12  |
| impurity E            | 382.49 | 27 | 0 | 0.85 | 10 | 6  | 2 | 106.90 | 95.94  | 75.90  |
| Impurity G            | 447.57 | 32 | 0 | 0.83 | 7  | 5  | 1 | 132.22 | 98.23  | 75.11  |
| Impurity H            | 528.73 | 38 | 0 | 0.87 | 8  | 5  | 1 | 162.04 | 93.52  | 76.74  |
| Impurity I            | 368.47 | 26 | 0 | 0.84 | 10 | 6  | 2 | 102.09 | 95.94  | 75.90  |
| Impurity J            | 240.30 | 17 | 0 | 0.83 | 3  | 4  | 2 | 67.06  | 83.63  | 80.15  |
| Impurity K            | 222.28 | 16 | 0 | 0.83 | 0  | 2  | 1 | 67.38  | 49.41  | 91.95  |
| <b>Impurity L</b>     | 211.26 | 15 | 0 | 0.82 | 2  | 3  | 1 | 59.55  | 57.61  | 89.12  |
| <b>Impurity M</b>     | 354.44 | 25 | 0 | 0.83 | 9  | 6  | 2 | 97.28  | 95.94  | 75.901 |
| <b>Impurity N</b>     | 370.48 | 26 | 0 | 0.84 | 13 | 6  | 3 | 100.19 | 104.73 | 72.87  |
| <b>Impurity O</b>     | 519.67 | 37 | 0 | 0.86 | 12 | 7  | 2 | 148.13 | 116.25 | 68.89  |
| <b>Impurity P</b>     | 368.47 | 26 | 0 | 0.84 | 10 | 6  | 2 | 102.09 | 95.94  | 75.901 |
| Perindopril arginine  | 542.67 | 38 | 0 | 0.80 | 16 | 11 | 6 | 145.94 | 225.61 | 31.17  |

\*% ABS = 109 – (0.345 · TPSA)

|               | Mol. weight [g/mol] | No. Heavy atoms | No. Arom. Heavy atoms | Fraction Csp <sup>3</sup> | No. rotatable bonds | No. H-bond acceptors | No. H-bond donors | Molar refractivity | TPSA [Å <sup>2</sup> ] | % ABS |
|---------------|---------------------|-----------------|-----------------------|---------------------------|---------------------|----------------------|-------------------|--------------------|------------------------|-------|
| <b>EDALEC</b> | 550.66              | 39              | 6                     | 0.68                      | 14                  | 9                    | 5                 | 147.60             | 187.10                 | 44.45 |
| <b>FIFGEG</b> | 434.53              | 31              | 6                     | 0.61                      | 9                   | 7                    | 4                 | 120.72             | 127.17                 | 65.12 |
| <b>IQISAE</b> | 416.51              | 30              | 6                     | 0.61                      | 10                  | 6                    | 2                 | 116.96             | 95.94                  | 75.90 |
| <b>RUWBAM</b> | 521.09              | 33              | 6                     | 0.59                      | 11                  | 6                    | 3                 | 137.53             | 160.35                 | 53.68 |
| <b>QQQWAW</b> | 416.51              | 30              | 6                     | 0.61                      | 11                  | 6                    | 2                 | 116.96             | 95.94                  | 75.90 |

|                 | Mol. weight [g/mol] | No. Heavy atoms | No. Arom. Heavy atoms | Fraction Csp <sup>3</sup> | No. rotatable bonds | No. H-bond acceptors | No. H-bond donors | Molar refractivity | TPSA [Å <sup>2</sup> ] | % ABS |
|-----------------|---------------------|-----------------|-----------------------|---------------------------|---------------------|----------------------|-------------------|--------------------|------------------------|-------|
| <b>CIYNIH</b>   | 366.41              | 26              | 6                     | 0.50                      | 9                   | 6                    | 3                 | 97.89              | 123.58                 | 66.36 |
| <b>DIVHOF01</b> | 492.52              | 35              | 6                     | 0.46                      | 13                  | 9                    | 3                 | 128.38             | 177.95                 | 47.61 |
| <b>GERXAE</b>   | 423.50              | 30              | 6                     | 0.57                      | 13                  | 7                    | 4                 | 115.02             | 146.64                 | 58.41 |
| <b>GERXEI</b>   | 405.49              | 29              | 6                     | 0.57                      | 13                  | 6                    | 3                 | 111.97             | 137.41                 | 61.6  |
| <b>GERWUX01</b> | 423.50              | 30              | 6                     | 0.57                      | 13                  | 6                    | 3                 | 114.33             | 154.33                 | 55.76 |
| <b>MCPRL01</b>  | 217.29              | 14              | 0                     | 0.78                      | 4                   | 3                    | 1                 | 59.97              | 96.41                  | 75.74 |
| <b>TUHMOY</b>   | 585.64              | 40              | 6                     | 0.70                      | 16                  | 7                    | 0                 | 155.62             | 122.85                 | 66.62 |
| <b>TUHMUE</b>   | 881.09              | 59              | 24                    | 0.32                      | 18                  | 8                    | 1                 | 239.35             | 253.39                 | 21.58 |
| <b>YOZTIS</b>   | 432.55              | 28              | 0                     | 0.78                      | 11                  | 6                    | 2                 | 117.16             | 165.82                 | 51.79 |

### Lipophilicity / Water Solubility

|                              | Log Po/w (iLogP) | Log Po/w (XLogP3) | Log Po/w (WLogP) | Log Po/w (MLogP) | Log Po/w (SILICOS-IT) | Consensus Log Po/w | Log S (ESOL)       | Log S (Ali)        | Log S (SILICOS-IT) |
|------------------------------|------------------|-------------------|------------------|------------------|-----------------------|--------------------|--------------------|--------------------|--------------------|
| <b>FEFKEI</b>                | 2.08             | -0.26             | -1.34            | -3.59            | 0.72                  | -0.48              | -1.37<br>Very sol. | -1.88<br>Very sol. | -1.14<br>Sol.      |
| <b>BECWIR</b>                | 2.76             | -0.40             | -0.42            | -3.21            | 0.72                  | -0.11              | -1.65<br>Very sol. | -2.30<br>Sol.      | -1.14<br>Sol.      |
| <b>IVEGIA</b>                | 4.37             | 0.23              | 0.12             | -3.78            | 1.68                  | 0.52               | -2.29<br>Sol.      | -2.83<br>Sol.      | -2.23<br>Sol.      |
| <b>UZOVIP</b>                | 4.27             | 0.70              | 0.19             | -3.01            | 1.68                  | 0.77               | -2.47<br>Sol.      | -3.13<br>Sol.      | -2.23<br>Sol.      |
| <b>UZOVAH</b>                | 4.37             | 1.18              | 0.25             | -2.23            | 1.68                  | 1.05               | -2.66<br>Sol.      | -3.43<br>Sol.      | -2.23<br>Sol.      |
| <b>BILNAN01 (impurity F)</b> | 3.51             | 2.91              | 1.35             | 1.75             | 1.80                  | 2.26               | -3.45<br>Sol.      | -3.98<br>Sol.      | -2.53<br>Sol.      |
| <b>Impurity A</b>            | 1.46             | -1.01             | 0.61             | -1.21            | 0.80                  | 0.13               | -0.19              | 0.46               | -0.83              |
| <b>Impurity B</b>            | 2.10             | 0.21              | 1.08             | -1.33            | 0.72                  | 0.55               | -1.55<br>Very sol. | -2.01<br>Sol.      | -1.14<br>Sol.      |
| <b>Impurity C</b>            | 2.30             | 1.81              | 0.48             | 1.04             | 0.76                  | 1.28               | -2.63<br>Sol.      | -3.07<br>Sol.      | -1.29<br>Sol.      |
| <b>impurity E</b>            | 3.34             | 1.34              | 1.95             | 1.58             | 1.92                  | 2.03               | -2.40<br>Sol.      | -2.96<br>Sol.      | -2.25<br>Sol.      |
| <b>Impurity G</b>            | 3.58             | 3.82              | 2.24             | 2.38             | 1.50                  | 2.70               | -4.56              | -5.58              | -2.06              |



|                             |      |       |       |       |       |       |                    |                      |               |      |
|-----------------------------|------|-------|-------|-------|-------|-------|--------------------|----------------------|---------------|------|
|                             |      |       |       |       |       |       |                    | Moder. Sol.          | Moder. Sol.   | Sol. |
| <b>Impurity H</b>           | 4.35 | 5.71  | 3.81  | 3.58  | 3.36  | 4.16  | -8.19              | -7.44                | -3.55         |      |
| <b>Impurity I</b>           | 2.93 | 0.91  | 1.56  | 1.36  | 1.68  | 1.69  | -2.04              | -2.51                | -2.23         |      |
| <b>Impurity J</b>           | 1.39 | -1.18 | 0.20  | 0.50  | -0.10 | 0.18  | -0.39<br>Very sol. | -0.08<br>Very Sol.   | -0.15<br>Sol. |      |
| <b>Impurity K</b>           | 2.08 | 1.15  | -0.10 | 0.92  | 0.71  | 0.95  | -1.94              | -1.78                | -1.57         |      |
| <b>Impurity L</b>           | 1.70 | 1.61  | 0.87  | 1.05  | 0.56  | 1.16  | -2.03<br>Sol.      | -2.43<br>Sol.        | -0.46<br>Sol. |      |
| <b>Impurity M</b>           | 2.39 | 0.54  | 1.17  | 1.12  | 1.27  | 1.30  | -1.78<br>Very sol. | -2.14<br>Sol.        | -1.83<br>Sol. |      |
| <b>Impurity N</b>           | 3.47 | 1.56  | 2.24  | 1.36  | 2.59  | 2.24  | -2.26<br>Sol.      | -3.37<br>sol.        | -3.30<br>Sol. |      |
| <b>Impurity O</b>           | 3.84 | 2.31  | 2.34  | 2.01  | 2.24  | 2.55  | -3.73<br>Sol.      | -4.39<br>Moder. Sol. | -2.89<br>Sol. |      |
| <b>Impurity P</b>           | 2.93 | 0.91  | 1.56  | 1.36  | 1.68  | 1.69  | -2.04<br>Sol.      | -2.51<br>Sol.        | -2.23<br>Sol. |      |
| <b>Perindopril arginine</b> | 2.40 | -2.91 | -1.83 | -5.99 | 1.68  | -1.33 | -0.32<br>Very sol. | -1.27<br>Very sol.   | -2.23<br>Sol. |      |

|               | <i>Log Po/w (iLogP)</i> | <i>Log Po/w (XLogP3)</i> | <i>Log Po/w (WLogP)</i> | <i>Log Po/w (MLogP)</i> | <i>Log Po/w (SILICOS-IT)</i> | <i>Consensus Log Po/w</i> | <i>Log S (ESOL)</i> | <i>Log S (Ali)</i> | <i>Log S (SILICOS-IT)</i> |
|---------------|-------------------------|--------------------------|-------------------------|-------------------------|------------------------------|---------------------------|---------------------|--------------------|---------------------------|
| <b>EDALEC</b> | 4.69                    | -0.91                    | -2.18                   | -3.78                   | 2.82                         | 0.13                      | -1.87<br>Very sol.  | -2.54<br>Sol.      | -4.30<br>Mod. Sol.        |
| <b>FIFGEG</b> | 3.17                    | 0.77                     | 1.52                    | -1.02                   | 1.86                         | 1.26                      | -2.57<br>Sol.       | -3.02<br>Sol.      | -3.22<br>Sol.             |
| <b>IQISAE</b> | 3.24                    | 1.61                     | 2.00                    | 1.98                    | 2.42                         | 2.25                      | -2.92<br>Sol.       | -3.24<br>Sol.      | -3.91<br>Sol.             |
| <b>RUWBAM</b> | 0.00                    | 1.20                     | -2.08                   | -2.49                   | 3.06                         | -0.06                     | -3.24<br>Sol.       | -4.16<br>Mod. Sol. | -4.38<br>Mod. Sol.        |
| <b>QOQWAU</b> | 3.06                    | 1.43                     | 2.00                    | 1.98                    | 2.57                         | 2.21                      | -2.75<br>Sol.       | -3.05<br>Sol.      | -4.04<br>Mod. Sol.        |

|                 | <i>Log Po/w (iLogP)</i> | <i>Log Po/w (XLogP3)</i> | <i>Log Po/w (WLogP)</i> | <i>Log Po/w (MLogP)</i> | <i>Log Po/w (SILICOS-IT)</i> | <i>Consensus Log Po/w</i> | <i>Log S (ESOL)</i>  | <i>Log S (Ali)</i>   | <i>Log S (SILICOS-IT)</i> |
|-----------------|-------------------------|--------------------------|-------------------------|-------------------------|------------------------------|---------------------------|----------------------|----------------------|---------------------------|
| <b>CIYNIH</b>   | 1.79                    | -1.21                    | -1.68                   | -3.61                   | 1.26                         | -0.69                     | -0.93<br>Very sol.   | -0.89<br>Very sol.   | -2.62<br>Sol.             |
| <b>DIVHOF01</b> | 3.51                    | -0.51                    | -1.43                   | -3.20                   | 2.22                         | 0.12                      | -1.84<br>Very sol.   | -2.76<br>Sol.        | -3.70<br>Sol.             |
| <b>GERXAE</b>   | 2.17                    | -3.33                    | -1.26                   | -5.92                   | 1.65                         | -1.34                     | 0.34<br>Highly sol.  | 0.82<br>Highly sol.  | -3.44<br>Sol.             |
| <b>GERXEI</b>   | 2.26                    | -2.86                    | -1.20                   | -5.14                   | 1.65                         | -1.06                     | 0.15<br>Highly sol.  | 0.53<br>Highly sol.  | -3.44<br>Sol.             |
| <b>GERWUX01</b> | 2.10                    | -3.33                    | -3.62                   | -7.39                   | 1.65                         | -2.12                     | 0.34<br>Highly sol.  | 0.67<br>Highly sol.  | -3.44<br>Sol.             |
| <b>MCPRL01</b>  | 1.46                    | 0.34                     | 0.25                    | 0.45                    | 0.61                         | 0.62                      | -1.14<br>Very sol.   | -1.93<br>Very sol.   | -0.38<br>Sol.             |
| <b>TUHMOY</b>   | -9.37                   | 6.24                     | 4.41                    | 3.74                    | 4.76                         | 1.95                      | -6.48<br>Poorly sol. | -8.61<br>Poorly sol. | -6.02<br>Poorly sol.      |
| <b>TUHMUE</b>   | -8.56                   | 8.75                     | 5.99                    | 4.15                    | 3.45                         | 2.76                      | -9.93<br>Poorly sol. | -13.95<br>Insol.     | -5.13<br>Mod. Sol.        |
| <b>YOZTIS</b>   | 2.14                    | 1.15                     | 1.03                    | 0.65                    | 1.09                         | 1.21                      | -2.52<br>Sol.        | -4.23<br>Mod. Sol.   | -0.75<br>Sol.             |

### Pharmacokinetics

|                              | <i>GI absorption</i> | <i>BBB permeant</i> | <i>P-gp substrate</i> | <i>CYP1A2 inhibitor</i> | <i>CYP2C19 inhibitor</i> | <i>CYP2C9 inhibitor</i> | <i>CYP2D6 inhibitor</i> | <i>CYP3A4 inhibitor</i> | <i>Log Kp [cm/s]</i> |
|------------------------------|----------------------|---------------------|-----------------------|-------------------------|--------------------------|-------------------------|-------------------------|-------------------------|----------------------|
| <b>FEFKEI</b>                | high                 | no                  | yes                   | no                      | no                       | no                      | no                      | no                      | -8.67                |
| <b>BECWIR</b>                | low                  | no                  | yes                   | no                      | no                       | no                      | no                      | no                      | -9.14                |
| <b>IVEGIA</b>                | low                  | no                  | yes                   | no                      | no                       | no                      | no                      | no                      | -9.05                |
| <b>UZOVIP</b>                | high                 | no                  | yes                   | no                      | no                       | no                      | no                      | no                      | -8.61                |
| <b>UZOVAH</b>                | high                 | no                  | yes                   | no                      | no                       | no                      | no                      | no                      | -8.16                |
| <b>BILNAN01 (impurity F)</b> | high                 | yes                 | no                    | no                      | no                       | no                      | no                      | no                      | -6.37                |
| <b>Impurity A</b>            | high                 | yes                 | no                    | no                      | no                       | no                      | no                      | no                      | -8.05                |
| <b>Impurity B</b>            | high                 | no                  | yes                   | no                      | no                       | no                      | no                      | no                      | -8.23                |

|                             |      |     |     |    |    |     |    |     |        |
|-----------------------------|------|-----|-----|----|----|-----|----|-----|--------|
| <b>Impurity C</b>           | high | no  | no  | no | no | no  | no | no  | -6.90  |
| <b>impurity E</b>           | high | no  | yes | no | no | no  | no | no  | -7.68  |
| <b>Impurity G</b>           | high | no  | no  | no | no | yes | no | yes | -6.32  |
| <b>Impurity H</b>           | high | no  | no  | no | no | yes | no | yes | -5.47  |
| <b>Impurity I</b>           | high | no  | yes | no | no | no  | no | no  | -7.90  |
| <b>Impurity J</b>           | high | no  | no  | no | no | no  | no | no  | -8.60  |
| <b>Impurity K</b>           | high | no  | no  | no | no | no  | no | no  | -6.84  |
| <b>Impurity L</b>           | high | yes | no  | no | no | no  | no | no  | -6.45  |
| <b>Impurity M</b>           | high | no  | yes | no | no | no  | no | no  | -8.08  |
| <b>Impurity N</b>           | high | no  | yes | no | no | no  | no | no  | -7.45  |
| <b>Impurity O</b>           | high | no  | no  | no | no | no  | no | yes | -7.83  |
| <b>Impurity P</b>           | high | no  | yes | no | no | no  | no | no  | -7.90  |
| <b>Perindopril arginine</b> | low  | no  | no  | no | no | no  | no | no  | -11.68 |

|               | <i>GI absorption</i> | <i>BBB permeant</i> | <i>P-gp substrate</i> | <i>CYP1A2 inhibitor</i> | <i>CYP2C19 inhibitor</i> | <i>CYP2C9 inhibitor</i> | <i>CYP2D6 inhibitor</i> | <i>CYP3A4 inhibitor</i> | <i>Log Kp [cm/s]</i> |
|---------------|----------------------|---------------------|-----------------------|-------------------------|--------------------------|-------------------------|-------------------------|-------------------------|----------------------|
| <b>EDALEC</b> | low                  | now                 | yes                   | no                      | no                       | no                      | no                      | no                      | -10.31               |
| <b>FIFGEG</b> | high                 | no                  | yes                   | no                      | no                       | no                      | no                      | no                      | -8.40                |
| <b>IQISAE</b> | high                 | no                  | yes                   | no                      | no                       | no                      | yes                     | yes                     | -7.70                |
| <b>RUWBAM</b> | low                  | no                  | yes                   | no                      | no                       | no                      | no                      | no                      | -8.63                |
| <b>QQQWAW</b> | high                 | no                  | yes                   | no                      | no                       | no                      | yes                     | yes                     | -7.83                |

|                 | <i>GI absorption</i> | <i>BBB permeant</i> | <i>P-gp substrate</i> | <i>CYP1A2 inhibitor</i> | <i>CYP2C19 inhibitor</i> | <i>CYP2C9 inhibitor</i> | <i>CYP2D6 inhibitor</i> | <i>CYP3A4 inhibitor</i> | <i>Log Kp [cm/s]</i> |
|-----------------|----------------------|---------------------|-----------------------|-------------------------|--------------------------|-------------------------|-------------------------|-------------------------|----------------------|
| <b>CIYNIH</b>   | low                  | no                  | no                    | no                      | no                       | no                      | no                      | no                      | -9.39                |
| <b>DIVHOF01</b> | low                  | no                  | no                    | no                      | no                       | no                      | no                      | no                      | -9.67                |
| <b>GERXAE</b>   | low                  | no                  | no                    | no                      | no                       | no                      | no                      | no                      | -11.25               |
| <b>GERXEI</b>   | low                  | no                  | no                    | no                      | no                       | no                      | no                      | no                      | -10.80               |
| <b>GERWUX01</b> | low                  | no                  | no                    | no                      | no                       | no                      | no                      | no                      | -11.25               |
| <b>MCPRL01</b>  | high                 | no                  | no                    | no                      | no                       | no                      | no                      | no                      | -7.38                |
| <b>TUHMOY</b>   | low                  | no                  | yes                   | no                      | no                       | no                      | no                      | no                      | -5.44                |
| <b>TUHMUE</b>   | low                  | now                 | yes                   | no                      | no                       | no                      | no                      | no                      | -5.46                |
| <b>YOZTIS</b>   | low                  | no                  | yes                   | no                      | no                       | no                      | no                      | no                      | -8.12                |

### Drug-likeness & Medicinal Chemistry

|                              | <i>Lipinski</i> | <i>Ghose</i> | <i>Veber</i> | <i>Egan</i> | <i>Muegge</i> | <i>Bioavailability score</i> | <i>Leadlikeness</i> | <i>Synthetic accessibility</i> |
|------------------------------|-----------------|--------------|--------------|-------------|---------------|------------------------------|---------------------|--------------------------------|
| <b>FEFKEI</b>                | Yes, 0          | No, 1        | yes          | yes         | yes           | 0.56                         | No, 2               | 3.96                           |
| <b>BECWIR</b>                | Yes, 0          | No, 1        | No, 1        | No, 1       | No, 1         | 0.11                         | No, 2               | 4.25                           |
| <b>IVEGIA</b>                | Yes, 0          | No, 2        | No, 1        | No, 1       | yes           | 0.55                         | No, 2               | 5.07                           |
| <b>UZOVIP</b>                | Yes, 0          | No, 1        | yes          | No, 1       | yes           | 0.56                         | No, 2               | 4.95                           |
| <b>UZOVAH</b>                | Yes, 0          | No, 1        | yes          | yes         | yes           | 0.55                         | No, 2               | 4.83                           |
| <b>BILNAN01 (impurity F)</b> | Yes,0           | yes          | yes          | yes         | yes           | 0.55                         | No, 1               | 4.12                           |
| <b>Impurity A</b>            |                 |              |              |             |               |                              |                     |                                |
| <b>Impurity B</b>            | Yes, 0          | yes          | yes          | yes         | yes           | 0.56                         | No, 1               | 3.85                           |
| <b>Impurity C/D</b>          | Yes, 0          | yes          | yes          | yes         | yes           | 0.56                         | yes                 | 3.52                           |
| <b>impurity E</b>            | Yes, 0          | yes          | yes          | yes         | yes           | 0.55                         | No, 2               | 4.31                           |
| <b>Impurity G</b>            | Yes, 0          | No, 1        | yes          | yes         | yes           | 0.56                         | No, 2               | 4.77                           |
| <b>Impurity H</b>            | Yes, 1          | No, 3        | yes          | yes         | No, 1         | 0.55                         | No, 3               | 6.03                           |
| <b>Impurity I</b>            | Yes, 0          | yes          | yes          | yes         | yes           | 0.55                         | No, 2               | 4.20                           |
| <b>Impurity J</b>            | Yes, 0          | yes          | yes          | yes         | yes           | 0.55                         | No, 1               | 3.09                           |
| <b>Impurity K</b>            | Yes, 0          | yes          | yes          | yes         | yes           | 0.55                         | No, 1               | 2.96                           |
| <b>Impurity L</b>            | Yes, 0          | yes          | yes          | yes         | yes           | 0.56                         | No, 1               | 2.71                           |
| <b>Impurity M</b>            | Yes, 0          | yes          | yes          | yes         | yes           | 0.55                         | No, 2               | 4.00                           |
| <b>Impurity N</b>            | Yes, 0          | yes          | No, 1        | yes         | yes           | 0.55                         | No, 2               | 3.98                           |
| <b>Impurity O</b>            | Yes, 1          | No, 3        | No, 1        | yes         | yes           | 0.55                         | No, 2               | 5.48                           |
| <b>Impurity P</b>            | Yes, 0          | yes          | yes          | yes         | yes           | 0.56                         | No, 2               | 4.20                           |
| <b>Perindopril arginine</b>  | No, 3           | No, 4        | No, 2        | No, 1       | No, 5         | 0.17                         | No, 2               | 5.49                           |

|  | <i>Lipinski</i> | <i>Ghose</i> | <i>Veber</i> | <i>Egan</i> | <i>Muegge</i> | <i>Bioavailability score</i> | <i>Leadlikeness</i> | <i>Synthetic accessibility</i> |
|--|-----------------|--------------|--------------|-------------|---------------|------------------------------|---------------------|--------------------------------|
|--|-----------------|--------------|--------------|-------------|---------------|------------------------------|---------------------|--------------------------------|

|               |        |       |       |       |       |      |       |      |
|---------------|--------|-------|-------|-------|-------|------|-------|------|
| <b>EDALEC</b> | No, 2  | No, 4 | No, 2 | No, 1 | No, 1 | 0.17 | No, 2 | 5.10 |
| <b>FIFGEG</b> | Yes, 0 | yes   | yes   | yes   | yes   | 0.56 | No, 2 | 4.18 |
| <b>IQISAE</b> | Yes, 0 | yes   | yes   | yes   | yes   | 0.55 | No, 2 | 4.23 |
| <b>RUWBAM</b> | Yes, 1 | No, 3 | No, 2 | No, 1 | No, 1 | 0.11 | No, 2 | 5.15 |
| <b>OOQWAW</b> | Yes, 0 | yes   | No, 1 | yes   | yes   | 0.55 | No, 2 | 4.23 |

|                 | <i>Lipinski</i> | <i>Ghose</i> | <i>Veber</i> | <i>Egan</i> | <i>Muegge</i> | <i>Bioavailability score</i> | <i>Leadlikeness</i> | <i>Synthetic accessibility</i> |
|-----------------|-----------------|--------------|--------------|-------------|---------------|------------------------------|---------------------|--------------------------------|
| <b>CIYNIH</b>   | Yes, 1          | No, 2        | No, 2        | No, 1       | No, 1         | 0.11                         | No, 2               | 4.22                           |
| <b>DIVHOF01</b> | Yes, 0          | yes          | yes          | yes         | yes           | 0.56                         | No, 1               | 2.47                           |
| <b>GERXAE</b>   | Yes, 0          | No, 1        | No, 2        | No, 1       | No, 1         | 0.55                         | No, 2               | 3.78                           |
| <b>GERXEI</b>   | Yes, 0          | No, 1        | No, 1        | No, 1       | No, 1         | 0.55                         | No, 2               | 3.67                           |
| <b>GERWUX01</b> | Yes, 0          | No, 1        | No, 2        | No, 1       | No, 2         | 0.55                         | No, 2               | 3.78                           |
| <b>MCPRL01</b>  | Yes, 0          | No, 1        | yes          | yes         | yes           | 0.56                         | No, 2               | 3.31                           |
| <b>TUHMOY</b>   | Yes, 1          | No, 3        | No, 1        | yes         | No, 2         | 0.55                         | No, 3               | 6.05                           |
| <b>TUHMUE</b>   | No, 2           | No, 4        | No, 2        | No, 2       | No, 4         | 0.11                         | No, 3               | 6.67                           |
| <b>YOZTIS</b>   | Yes, 0          | yes          | No, 2        | No, 1       | No, 1         | 0.11                         | No, 2               | 4.18                           |

## \*REFERENCES (vide Tab. S1):

- \*Aakeroy, C.B.; Bahra, G.S.; Brown, C.R.; Hitchcock, P.B.; Patell, Y.; Seddon, K.R. *Acta Chem. Scand.* **1995**, 49, 762.
- \*Abdaoui, M.; Dewynter, G.; Toupet, L.; Montero, J.L. *Tetrahedron.* **2000**, 56, 2427.
- \*Albrecht, M.; Hai, Y.; Koksal, O.; Raabe, G.; Pan, F.; Valkonen, A.; Rissanen, K. *Chem. Eur. J.* **2016**, 22, 6596.
- \*Almansa, C.; Merce, R.; Tesson, N.; Farran, J.; Tomas, J.; Plata-Salaman, C.R. CSD Communication (Private Communication). **2017**.
- \*Ambika, R. CSD Communication (Private Communication). **2017**.
- \*Andersen, T.P.; Rasmusse, P.B.; Thomsen, I.; Lawesson, S.O.; Jorgensen, P.; Lindhardt, P. *Liebigs Ann.* **1986**, 269.
- \*Arman, H.D.; Kaulgud, T.; Tiekink, E.R.T. *Acta Crystallogr. E.* **2009**, 65, 02950.
- \*Athimoolan, S.; Natarajan, S. *Acta Crystallogr. C.* **2007**, 63, o283.
- \*Aubry, A.; Bayeul, D.; Mangeot, J.P.; Vidal, J.; Sterin, S.; Collet, A.; Lecoq, A.; Marraud, M. X. *Biopolymers.* **1991**, 31, 793.
- \*Babor, M.; Nievergelt, P.P.; Cejka, J.; Zvonicek, V.; Springler, B. *IUCrJ*, **2019**, 6, 145.
- \*Bakonyi, B.; Furegati, M.; Kramer, C.; La Vecchia, L.; Ossola, F. *J. Org. Chem.*, **2013**, 78, 9328.
- \*Baldwin, J.E.; Hulme, C.; Edwards, A.J.; Schofield, C.J.; Parkes, K.E.B. *Tetrahedron Lett.* **1993**, 34, 1665.
- \*Bando, S.; Tanaka, N.; Ahida, T.; Kakudo, M. *Acta Cryst. B.* **1978**, 34, 3447.
- \*Basak, A.; Ghosh, S.C.; Das, A.K.; Bertolasi, V. *Org. Biomol. Chem.* **2005**, 3, 4050.
- \*Baert, F.; Lobry, M.; Warin, V. *C.R. Acad. Sci. C.* **1975**, 280, 743.
- \*Baird, P.D.; Dho, J.C.; Fleet, G.W.J.; Peach, J.M.; Prout, K.; Smith, P.W. *J. Chem. Soc., Perkin Trans. 1.* **1987**, 1785.
- \*Baldwin, J.E.; Bamford, S.J.; Fryer, A.M.; Rudolph, M.P.W.; Wood, M.E. *Tetrahedron.* **1997**, 53, 5255.
- \*Barker, E.C.; Goh, C.Y.; Jones, F.; Mocerino, M.; Skelton, B.W.; Becker, T.; Ogden, M.I. *Chemical Science*, **2015**, 6, 6133.
- \*Baumann, M.; Baxendale, I.R. *J. Org. Chem.* **2016**, 81, 11898.
- \*Bavoso, A.; Benedetti, E.; Di Blasio, B.; Pavone, V.; Toniolo, C.; Bonora, G.M. *Macromolecules.* **1982**, 15(1), 54.
- \*Bedekar, A.; Muller, G.; Mothuku, S.S.; Mande, H.; Tovar, R. *Tetrahedron Lett.* **2014**, 55, 1760.
- \*Bell, E.A.; Quereshi, M.Y.; Pryce, R.J.; Janzen, D.H.; Lemke, P.; Clardy, J. *J. Am. Chem. Soc.* **1980**, 102, 1409.
- \*Bendzinska-Berus, W.; Jelecki, M.; Kwit, M.; Rychlewska, U. *CrystEngComm* **2019**, 21, 3420.
- \*Benedetti, E.; Ciajolo, M.R.; Maisto, M.R. *Acta Crystallogr. B.* **1974**, 30, 1783.
- \*Benedetti, E.; Bonora, G.M.; Toniolo, C. *Macromolecules.* **1976**, 9(3), 417.
- \*Benedetti, E.; Ciajolo, A.; di Blasio, B.; Pavone, V.; Pedone, C.; Toniolo, C.; Bonora, G.M. *Int. J. Pept. Protein Res.* **1979**, 14, 130.
- \*Bernardi, F.; Garavelli, M.; Scatizzi, M.; Tomasini, C.; Trigari, V.; Crisma, M.; Formaggio, F.; Peggion, C.; Toniolo, C. *Chem. Eur. J.* **2002**, 8, 2516.
- \*Best, D.; Jenkinson, S.F.; Thompson, A.L.; Watkin, D.J.; Wilson, F.X.; Nash, R.J.; Fleet, G.W.J. .... *Acta Crystallogr. E*, 2009, 65, o2418-...
- \*Bhuyan, B.J.; Mugesh, G. *Org. Biomol. Chem.* **2011**, 9, 1356.

- \*Bialonska, A.; Ciunik, Z. *CrystEngComm* **2006**, *8*, 66.
- \*Bien, J.T.; Desphande, P.P.; Dimarco, J.D.; Gougoutas, J.Z.; Grosso, J.A.; Lai, C.; Lobinger, H.; Nirschi, A.A.; Ramakrishnan, S.; Riebel, P.; Singh, J.; Wang, C. *US Patents* **2009**.
- \*Blankley, C.J.; Kaltenbronn, J.S.; DeJohn, D.E.; Werner, A.; Bennett, L.R.; Bobowski, G.; Krolls, U.; Johnson, D.R.; Pearlman, W.M.; Hoefle, M.L.; Essenburg, A.D.; Cohen, D.M.; Kaplan, H.R. *J. Med. Chem.* **1987**, *30*, 992.
- \*Bowler, A.N.; Doyle, P.M.; Hitchcock, P.B.; Young, D.W. *Tetrahedron* **1997**, *53*, 10545.
- \*Bunch, L.; Lijefors, T.; Greenwood, J.R.; Frydenvang, K.; Brauner-Osborne, H.; Krosgaard-Larsen, P.; Madsen, U. *J. Org. Chem.* **2003**, *68*, 1489.
- \*Busetti, D.A.; Granozzi, G. *Tetrahedron*. **1982**, *38*(22), 3329.
- \*Camus, F.; Norberg, B.; Bourry, A.; Rigo, B.; Durant, F. *Acta Crystallogr. E*, **2001**, *57*, o439.
- \*Carreras, J.; Avenzoza, A.; Busto, J.H.; Peregrina, J.M. *J. Org. Chem.* **2011**, *76*(9), 3381.
- \*Chandan, N.; Moloney, M.G. *Org. Biomol. Chem.* **2008**, *6*, 3664.
- \*Chandrarekha, M.; Krishnakumar, R.V.; Srinivasan, N. *CSD Communication* (Private Com.), 2016.
- \*Chesna, A.M.; Cox, J.M.; Basso, S.; Benedict, J.B. *Acta Crystallogr. E*, **2017**, *73*, 369.
- \*Cantrell, B.E.; Zimmerman, D.M.; Monn, J.A.; Kamboj, R.K.; Hoo, K.H.; Tizzano, J.P.; Pullar, I.A.I. Farrell, L.N.; Bleakman, D. *J. Med. Chem.* **1996**, *39*, 3617.
- \*Chen, J.; Sheng, T.; Hu, S.; Xiang, S.; Fu, R.; Zhu, Q.; Wu, X. *J. Solid State Chem.* **2012**, *192*, 255.
- \*Cheng, W.C.; Liu, Y.; Wong, M.; Olmstead, M.M.; Lam, K.S.; Kurth, M.J. *J. Org. Chem.* **2002**, *67*, 5673.
- \*Cini, E.; Giorgi, G.; Rodriguez, M.; Taddei, M. *Synlett* **2009**, 1562.
- \*Ciunik, Z.; Glowiak, T. *Acta Crystallogr. B* **1981**, *37*, 693.
- \*Coggon, P. *J. Chem. Soc. B* **1970**, 838.
- \*Colapietro, M.; De Santis, P.; Nocilli, F.; Palleschi, A.; Spagna, R. *Acta Crystallogr. C* **1985**, *41*, 126.
- \*Colapietro, M.; de Santis, P.; Palleschi, A.; Spagna, R. *Biopolymers*. **1986**, *25*, 2227.
- \*Cruishank, D.W.J. *Acta Crystallogr.* **1959**, *12*, 1052.
- \*Dai, H.F.; Chen, W.X.; Zhao, L.; Xiong, F.; Sheng, H.; Chen, F.E. *Adv. Synth. Catal.* **2008**, *350*, 1635.
- \*Dai, J.; Wen, X.C. *Acta Crystallogr. E* **2008**, *64*, o1960.
- \*Dank, C.; Wurzer, R.; Felsing, S.; Bugl, R.; Kahlig, H.; Hela, W.; Roller, A.; Gstach, H. *Molecules* **2020**, *25*, 449.
- \*Davies, S.G.; Fletcher, A.M.; Lindsall, S.M.; Roberts, P.M.; Thomson, J.E. *Org. Lett.* **2018**, *20*, 4135.
- \*Delgado, G.E.; Sijas, L.E.; Mora, A.J.; Gonzales, T.; Briceno, A. *J. Chem. Cryst.* **2012**, *42*, 388.
- \*Del Valle, J.R.; Goodman, M. *Angew. Chem. Int. Ed.* **2002**, *41*, 1600.
- \*De Poli, M.; Moreto, A.; Crisma, M.; Peggion, C.; Formaggio, F.; Kaptein, B.; Broxterman, Q.B.; Toniolo, C. *Chem. Eur. J.* **2009**, *15*, 8015.
- \*Desphande, P.P.; Singh, J.; Pullockaran, A.; Kissick, T.; Elsworth, B.A.; Gougoutas, J.Z.; Dimarco, J.; Fakes, M.; Reyes, M.; Lai, C.; Lobinger, H.; Denzel, T.; Ermann, P.; Crispino, G.; Randazzo, M.; Gao, Z.; Randazzo, R.; Lindrud, M.; Ross, V.; Buono, F.; Doubleday, W.W.; Leung, S.; Richberg, P.; Hughes, D.; Washburn, W.N.; Meng, W.; Mueller, R.J. *Org. Process Res. Dev.* **2012**, *16*, 577.
- \*Dick, M.; Sarai, N.S.; Martynowycz, M.W.; Gonen, T.; Arnold, F.H. *J. Am. Chem. Soc.* **2019**, *141*, 19817.
- \*Dijnovic-Carugo, K.; Golic, L.; Leban, I.; Svete, J.; Stanovnik, B.; Tisler, M.; Tate, C. *Acta Crystallogr. C* **1994**, *50*, 239.
- \*Dittrich, B.; Strumpel, M.; Schafer, M.; Spackman, M.A.; Koritsanszky, T. *Acta Crystallogr.* **2006**, *62*, 217.
- \*Dobrova, A.; Platzer, S.; Bacher, F.; Milunovic, M.N.M.; Dobrov, A.; Spengler, G.; Enyedy, E.A.; Novitchi, G.; Arion, V.B. *Dalton Trans.* **2016**, *45*, 13427.
- \*Doi, M.; Nishi, Y.; Kritoshi, N.; Iwata, T.; Nago, M.; Nakano, H.; Uchiyama, S.; Nakazawa, T.; Kobayashi, Y. Simple and efficient syntheses of Boc- and Fmoc-protected 4<sup>R</sup>- and 4(S)-fluoroproline solely from 4(R)-hydroxyproline. *Tetrahedron*. **2002**, *58*, 8453.
- \*Dong, C.M.; Chen, L.G.; Duan, X.M.; Shu, X.G.; Zeng, T.; Li, Y. *Acta Crystallogr. E* **2005**, *61*, o960.
- \*Donohoe, T.J.; O'Riordan, T.J.C.; Peifer, M.; Jones, C.R.; Miles, T.J. *Org. Lett.* **2012**, *14*, 5460.
- \*Duanxiu, L.; Kong, M.; Li, J.; Deng, Z.; Zhang, H. *CrystEngComm*. **2018**, *20*, 5112.
- \*Duggan, H.M.E.; Hitchcock, P.B.; Young, D.W. *Org. Biomol. Chem.* **2005**, *3*, 2287.
- \*Dupont, L.; Dideberg, O.; Welter, A. *Acta Crystallogr. B* **1975**, *31*, 1018.
- \*Dupont, L.; Lamotte, J.; Campsteyrn, H.; Vermeire, M.; Welter, A. *Acta Crystallogr. B* **1978**, *34*, 850.
- \*Eberle, M.K.; Brzechffa, L.; Kahle, G.G.; Talati, S.; Weber, H.P. *J. Org. Chem.* **1980**, *45*, 3143.
- \*Eckle, E.; Stezowski, J.J.; Hughes, R.E. *Acta Crystallogr. A*, **1978**, *34*, S74.
- \*Edgeley, D.S.; Martinez, R.F.; Jenkinson, S.F.; Nash, R.J.; Fleet, G.W.J.; Thompson, A.L. *Acta Crystallogr. E* **2012**, *68*, o2865.
- \*Emge, T.J.; Strickland, L.C.; Perkins, C.M. *Acta Crystallogr. C*, **1990**, *46*, 286.

- \*Eustache, J.; Van de Weghe, P.; Le Nouen, D.; Uyehara, H.; Kabuto, C.; Yamamoto, Y. *J. Org. Chem.* **2005**, 70, 4043.
- \*Ficker, R.; Hiller, W.; Krauss, S.; Voelter, W. *Z. Krist. Cryst. Mater.* **1995**, 210, 960.
- \*Finke, P.E.; Shah, S.K.; Ashe, B.M.; Ball, R.G.; Blackblock, T.J.; Bonney, R.J.; Brause, K.A.; Chandler, G.O.; Cotton, M.; Davies, P.; Dellea, P.S.; Dorn Junior, C.P.; Fletcher, D.S.; O'Grady, L.A.; Hagmann, W.K.; Hand, K.M.; Knight, W.B.; Maycock, A.L.; Mumford, R.A.; Osinga, D.G.; Sohar, P.; Thompson, K.R.; Weston, H.; Doherty, J.B. *J. Med. Chem.* **1992**, 35, 3731.
- \*Flaig, R.; Koritsanszky, T.; Dittrich, B.; Wagner, A.; Luger, P. *J. Am. Chem. Soc.* **2002**, 124, 3407.
- \*Fleck, M.; Ghazaryan, V.V.; Petrosyan, A.M. *J. Mol. Struct.* **2015**, 1079, 460.
- \*Fleischhacker, W.; Riedl, T.; Vollenkle, H.; Noe, C.R. *Arch. Pharm. Chem. Life Sci.* **1996**, 329, 41.
- \*Flippen, J.L.; Gilardi, R.D. *ACS* **1976**, 73a.
- \*Foley, D.J.; Doveston, R.G.; Churcher, I.; Nelson, A.; Marsden, S.P. *Chem. Commun.* **2015**, 51, 11174.
- \*Foletti, C.; Trapp, N.; Loosli, S.; Lewandowski, B.; Wennemers, H. *Helv. Chim. Acta* **2019**, 102, e1900052.
- \*Fonari, M.S.; Chumakov, Y.M.; Duca, G.G.; Ganin, E.V.; Yavolovskii, A.A.; Lis, T.; Simonov, Y.A. *Tetrahedron*, **2006**, 62, 8779.
- \*Forbes, C.R.; Pandey, A.K.; Ganguly, H.K.; Yap, G.P.A.; Zondlo, N.J. *Org. Biomol. Chem.* **2016**, 14, 2327.
- \*Frebault, F.; Luparai, M.; Oliveira, M.T.; Goddard, R.; Maulide, N. *Angew. Chem. Int.* **2010**, 49, 5672.
- \*Fridrichsons, J.; McL.Mathieson, M. *Acta Crystallogr.*, **1962**, 15, 569.
- \*Fu, T.Y.; Scheffer, J.R.; Trotter, J. *Acta Crystallogr. C.* **1997**, 53, 1259.
- \*Fujisawa, I.; Kitamura, Y.; Kato, R.; Aoki, K. *J. Mol. Struct.* **2018**, 1163, 336.
- \*Fujimoto, Y.; Irreverre, F.; Karle, J.; Karle, I.L.; Witkop, B. *J. Am. Chem. Soc.* **1971**, 93, 3471.
- \*Galitskii, N.M.; Deigin, V.I.; Saenger, W.; Pletnev, V.Z. *Bioorg. Khim.* **1977**, 3, 1445.
- \*Garbay-Jaureguiberry, C.; Arnoux, B.; Prange, T.; Wehri-Altenburger, S.; Pascard, C.; Roques, B.P. X-ray and NMR studies of L-4-hydroxyproline conformation in oligopeptides related to collagen. *J. Am. Chem. Soc.* 1980, 102, 1827-1837.
- \*Gharzaryan, V.V.; Fleck, M.; Petrosyan, A.M. *Proc. of SPIE – Int. Conf. Las. Phys.* **2011**, 7998, 79980F-..
- \*Ghazaryan, V.V.; Fleck, M.; Petrosyan, A.M. *J. Cryst. Growth* **2014**, 401, 857.
- \*Guenoun, F.; Zair, T.; Lamaty, F.; Pierrot, M.; Lazaro, R.; Viallefont, P. *Tetrahedron Lett.*, **1997**, 38, 1563.
- \*Hack, V.; Reuter, C.; Opitz, R.; Schmieder, P.; Beyermann, M.; Neudorfl, J.M.; Kuhne, R.; Schmalz, H.G. *Angew. Chem. Int.* **2013**, 52, 9539.
- \*Hammarstrom, L.G.J.; McLaughlin, M.L.; Fronczek, F.R. *CSD Communication (Private Communication)*. **2014**.
- \*Hanessian, S.; Reinhold, U.; Gentle, G. *Angew. Chem.*, **1997**, 36, 1881.
- \*Hanessian, S.; Sailes, H.; Therrien, E. *Tetrahedron*. **2003**, 59, 7047-7056.
- \*Hanessian, S.; Papeo, G.; Angiolini, M.; Fettis, K.; Beretta, M.; Munro, A. *J. Org. Chem.* **2003**, 68, 7204.
- \*Hanessian, S.; Shao, Z.; Warrier, J.S. *Org. Lett.* **2006**, 8, 4787.
- \*Hausin, R.J.; Codding, P.W. *J. Med. Chem.* **1990**, 33, 1940.
- \*He, H.; Huang, Y.; Zhang, Q.; Wang, J.R.; Mei, X. *Cryst. Growth Des.* **2016**, 16, 2348.
- \*He, H.; Zhang, Q.; Li, M.; Wang, J.R.; Mei, X. *Cryst. Growth Des.* **2017**, 17, 3989.
- \*Herdeis, C.; Aschenbrenner, A.; Kirfel, A.; Schwabenlander, F. *Tetrahedron: Asymm.* **1997**, 8, 2421.
- \*Hernandez-Paredas, J.; Olvera-Tapia, A.L.; Arenas-Garcia, J.I.; Hopfl, H.; Morales-Rojas, H.; Herrera-Ruiz, D.; Gonzaga-Morales, A.I.; Rodriguez-Fragoso, L. *CrystEngComm*. **2015**, 17, 5166.
- \*Hobart Junior, D.B.; Merola, J.S. *Acta Crystallogr. E*, **2012**, 68, o2490.
- \*Hobart, D.B.; Merola, J.S. *Acta Crystallogr. E*, **2013**, 69, m261.
- \*Hospital, M.; Courseille, C.; Leroy, F.; Roques, B.P. *Biopolymers*, **1979**, 18, 1141.
- \*Hu, X.; Shan, Z.; Chang, Q. *Tetrahedron: Asymm.* **2012**, 23, 1327.
- \*Hua, H.; Cheng, M.; Li, X.; Pei, Y. *Chem. Pharm. Bull.* **2002**, 50, 1393.
- \*Hursthouse, M.B.; Karaulov, A. *CSD Communication (Private Communication)* **2003**.
- \*Huy, P.; Neudorfl, J.M.; Schmalz, H.G. *Org. Lett.* **2011**, 13, 216.
- \*Iminov, R.T.; Tverdokhlebov, A.V.; Tolmachev, A.A.; Volovenko, Y.M.; Kostyrak, A.N.; Chernega, A.N.; Rusanov, E.B. *Heterocycles*. **2008**, 75, 1673.
- \*Issa, T.B.; Sayari, F.; Ghalla, H.; Benhamada, L. *J. Mol. Struct.* **2019**, 1178, 436.
- \*Janczak, J.; Luger, P. *Acta Crystallogr. C* **1997**, 53, 1954.

- \*Jenkinson, S.F.; Cowley, A.; Kato, A.; Kato, N.; Hollinshead, J.; Nash, R.J.; Booth, K.V.; Fleet, G.W.J. *Acta Crystallogr. E*. **2007**, 63, o3717.
- \*Jin, Z.M.; Pan, Y.J.; Hu, M.L.; Shen, L.; Li, M.C. *Cryst. Res. Technol.* **2003**, 38, 1009.
- \*Jones, F.T.; Palmer, K.J.; Black, D.R. *Anal. Chem.* **1953**, 25, 1929.
- \*Jones, G.P.; Naidu, B.P.; Paleg, L.G.; Tiekink, E.R.T. *Acta Crystallogr. C*. **1988**, 44, 1669.
- \*Jones, G.P.; Paleg, L.G.; Waisel, Y.; Solomon, A.; Beer, S.; Tiekink, E.R.T. *Acta Crystallogr. C*. **1995**, 51, 287.
- \*Kaczmarek, K.; Wojciechowski, J.; Wolf, W.M. *Acta Crystallogr. E*. **2010**, 66, o831.
- \*Kanao, S.; Nagashima, N. *J. Pharm. Soc. Jpn.* **1978**, 98, 293.
- \*Kale, S.S.; Kunjir, S.M.; Gawade, R.L.; Puranik, V.G.; Rajamohanam, P.R.; Sanjayan, G.J. *Chem. Commun.* **2014**, 50, 2886.
- \*Kamwaya, M.E.; Oster, O.; Bradaczek, H. *Acta Crystallogr. B*. **1981**, 37, 1564.
- \*Kamwaya, M.E.; Oster, O.; Bradaczek, H. *Acta Crystallogr. B*. **1981**, 37, 364.
- \*Kamwaya, M.E.; Oster, O.; Bradaczek, H.; Ponnuswamy, M.N.; Parthasarathy, S.; Nagaraj, R.; Balaram, P. *Acta Cryst. B*. **1982**, 38, 172.
- \*Karle, I.L. *Acta Crystallogr. B*. **1970**, 26, 765.
- \*Kartha, G.; Ashida, T.; Kakudo, M. *Acta Crystallogr. B*. **1974**, 30, 1861.
- \*Kaas, Sorensen, H. *Acta Chem. Scand.* **1977**, 31, 364.
- \*Kemp, D.S.; Curran, T.P.; Davis, W.M.; Boyd, J.G.; Muendel, C. *J. Org. Chem.* **1991**, 56, 6672.
- \*Kemp, D.S.; Rothman, J.H.; Curran, T.C.; Blanchard, D.E. *Tetrahedron Lett.* **1995**, 36, 3809.
- \*Kessler, H. Detection of hindered rotation and inversion by NMR spectroscopy. *Angew. Chem.* **1970**, 82, 237.
- \*Khokhar, A.R.; Xu, Q.; Al-Baker, S.A.; Lumetta, G.J. *Inorg. Chim. Acta*. **1993**, 203, 121.
- \*Kim, H.; Yoo, D.; Choi, S.Y.; Chung, Y.K.; Kim, Y.G. *Tetrahedron: Asymm.* **2008**, 19, 1965.
- \*Kirmizibekmez, H.; Calis, I.; Perozzo, R.; Brun, R.; Donmez, A.A.; Linden, A.; Ruedi, P.; Tasdemir, D. *Planta Med.* **2004**, 70, 711.
- \*Klussmann, M.; White, A.J.P.; Armstrong, A.; Blackmond, D.G. *Angew. Chem. Int.* **2006**, 45, 7985.
- \*Kodama, K.; Hayashi, N.; Fujita, M.; Hirose, T. *RSC Advances*. **2014**, 4, 25609.
- \*Koetzle, T.F.; Lehmann, M.S.; Hamilton, W.C. *Acta Crystallogr. B*, **1973**, 29, 231.
- \*Kojima, T.; Yamane, T.; Ashida, T. *Acta Crystallogr. B*. **1978**, 34, 2896.
- \*Kolstoe, S.E.; Jenvey, M.C.; Purvis, A.; Light, M.E.; Thompson, D.; Hughes, P.; Pepys, M.B.; Wood, S.P. *Acta Crystallogr. D*. **2014**, 70, 2232.
- \*Kondratov, I.S.; Bugera, M.Y.; Cantrel, N.A.; Daniliuc, C.G.; Haufe, G. *J. Fluorine Chem.* **2018**, 211, 100.
- \*Koskinen, A.M.P.; Helaja, J.; Kumpulainen, E.T.T.; Koivisto, J.; Mansikkamaki, H.; Rissanen, K.; *J. Org. Chem.*, **2005**, 70, 2005.
- \*Koyama, G. *Helv. Chim. Acta*. **1974**, 57, 2477.
- \*Kraatz, H.B.; Leek, D.M.; Houmam, A.; Enright, G.D.; Luszyk, J.; Wayner, D.D.M. *J. Organomet. Chem.* **1999**, 589, 38.
- \*Krapcho, J.; Turk, C.; Cushman, D.W.; Powell, J.R.; DeForrest, J.M.; Spitzmiller, E.R.; Karanewsky, D.S.; Duggan, M.; Rovnyak, G.; Schwartz, J.; Natarajan, S.; Godfrey, J.D.; Ryono, D.E.; Neubeck, R.; Atwal, K.S.; Petrillo, E.W. *J. Med. Chem.* **1988**, 31, 1148.
- \*Krasnov, V.P.; Nizova, I.A.; Vigorov, A.Y.; Matveeva, T.V.; Levit, G.L.; Slepukhin, P.A.; Ezhnikova, M.A.; Kodess, M.I. *Eur. J. Org. Chem.* **2008**, 1802.
- \*Kubyshkin, V.S.; Mykhailuk, P.K.; Afonin, S.; Ulrich, A.S.; KOMarov, I.V. *Org. Lett.* **2012**, 14, 5254.
- \*Kumar, P.S.; Kapat, A.; Baskaran, S. *Tetrahedron Lett.*, **2008**, 49, 1241.
- \*Kumara Swamy, K.C.; Kumaraswamy, S.; Kommana, P. *J. Am. Chem. Soc.* **2001**, 123, 12642.
- \*Kumberger, O.; Schmidbaur, H. *New J. Chem.* **1991**, 15, 401.
- \*Kumberger, O.; Riede, J.; Schmidbaur, H. *Chem. Ber.* **1992**, 125, 1829.
- \*Li, Y.R.; Cui, J.L.; Yu, S.Y.; Zhong, C.S.; Wang, N.; Wang, X. *Chin. J. Struct. Chem.* **2019**, 38, 1727.
- \*Liang, Y.F.; Chung, C.C.; Liao, D.J.; Lee, W.J.; Tu, Y.W.; Uang, B.J. *J. Org. Chem.* **2018**, 83, 10564.
- \*Liautard, V.; Jardel, D.; Davies, C.; Berlande, M.; Buffeteau, T.; Cavagnat, D.; Robert, F.; Vincent, J.M.; Landais, Y. *Chem. Eur. J.* **2013**, 19, 14532.
- \*Light, M.E. *CSD Communication*, **2019**.
- \*Linden, A.; Jimmy, M.; Robinson, J.A. *CSD Communication (Private Communication)*. **2018**.
- \*Lu, Y.; Nakatsuji, H.; Okumura, Y.; Yao, L.; Ishihara, K. *J. Am. Chem. Soc.* **2018**, 140, 6039.
- \*Liu, Z.; Hu, X.; Abramyan, A.M.; Csekei, M.; Kotschy, A.; Huc, I.; Pophristic, V. *Chem. Eur. J.* **2017**, 23, 3605.
- \*Liu, T.; Yan, N.; Zhao, H.; Wang, Z.X.; Hu, X.G. *J. Fluorine Chem.* **2018**, 207, 18.
- \*Lubben, J.; Volkmann, C.; Grabowsky, S.; Edwards, A.; Morgenroth, W.; Fabbiani, F.P.A.; Sheldrick, G.M.; Dittrich, B. *Acta Crystallogr. A*, **2014**, 70, 309.

- \*Luparia, M.; Oliveira, M.T.; Audisio, D.; Frebault, F.; Goddard, R.; Maulide, N. *Angew. Chem.* **2011**, *50*, 12631.
- \*Macias, B.; Villa, M.V.; Chicote, E.; Martin-Velasco, S.; Castineiras, A.; Borrás, J. *Polyhedron.* **2002**, *21*, 1899.
- \*Marchand, A.P.; Watson, W.H. *CSD Communication.* **2006**.
- \*Marsch, M.; Weiher, F.; Geyer, A. *CSD Communication.* **2019**.
- \*Marques, M.; Braga, W.; Siqueira, J.; Prado, L.; Rocha, H.; Ferreira, F.; Ferreira, G.; Resende, J.A.L.C. *CSD Communication* (Private Communication). **2019**.
- \*Martin, S.F.; Bur, S.K. Vinylogous mannich reactions. Stereoselective formal synthesis of pumiliotoxin 251D. *Tetrahedron.* **1999**, *55*, 8905.
- \*Mascitti, V.; Maurer, T.S.; Robinson, R.P.; Bian, J.; Boustany-Kari, C.M.; Brandt, T.; Collman, B.M.; Kalgutkar, A.S.; Klenotic, M.K.; Leininger, M.T.; Lowe, A.; Maguire, G.J.; Masterson, V.M.; Miao, Z.; Mukaiyama, E.; Patel, J.D.; Petterson, J.C.; Preville, C.; Samas, B.; She, L.; Sobol, Z.; Stepan, C.M.; Stevens, B.D.; Thuma, B.A.; Tugnait, M.; Zeng, D.; Zhu, T. *J. Med. Chem.* **2011**, *54*, 2952.
- \*Matsumura, Y.; Ogura, K.; Kouchi, Y.; Iwasaki, F.; Onomura, O. *Org. Lett.* **2006**, *8*, 3789.
- \*Mattson, A.; Boutelje, J.; Csoregh, I.; Hjmarsson, M.; Jacobsson, U.; Lindback, M.; Norin, T.; Szmulik, P.; Hult, K. *Biorog. Med. Chem.* **1994**, *2*, 501.
- \*Maverick, A.W.; Fronczek, F.R.; Martone, D.P.; Bradbury, J.R. *J. Coord. Chem.* **1989**, *20*, 149.
- \*Meesakul, P.; Jaidee, W.; Richardson, C.; Andersen, R.J.; Patrick, B.O.; Willis, A.C.; Muanprasat, C.; Wang, J.; Lei, X.; Hadsadee, S.; Jungsuttiwong, S. *Photochemistry.* **2020**, *171*, 112248.
- \*Milne, P.J.; Oliver, D.W.; Roos, H.M. *J. Crystallogr. Spectrosc. Res.* **1993**, *23*, 449.
- \*Milne, P.J.; Oliver, D.W.; Van Rooyen, P.H.; Roos, H.M. *J. Chem. Cryst.*, **1997**, *27*, 167.
- \*Milunovic, M.N.M.; Eneudy, E.A.; Nagy, N.V.; Kiss, T.; Trondl, R.; Jakupc, M.A.; Keppler, B.K.; Krachler, R.; Novitchi, G.; Arion, V.B. *Inorg. Chem.* **2012**, *51*, 9309.
- \*Milunovic, M.N.M.; Dobrova, A.; Novitvhi, G.; Gligorijevic, N.; Radulovic, S.; Kozisek, J.; Rapta, P.; Enyedy, E.A.; Arion, V.B. *Eur. J. Inorg. Chem.* **2017**, 4773.
- \*Minacheva, L.K.; Slyudkin, O.P.; Zefirov, Y.V.; Sakharova, V.G.; Porai-Koshits, M.A. *Koord. Khim.* **1989**, *15*, 825.
- \*Mitsui, Y.; Tsuboi, M.; Itaka, Y. *Acta Crystallogr. B.* **1969**, *25*, 2182.
- \*Moggach, S.A.; Parsons, S.; Sawyer, L. *Acta Crystallogr. E.* **2006**, *62*, o1046.
- \*Mohana Priyadarshini, K.; Chandramohan, A.; Anadha Babu, G.; Ramasamy, P. *Solid State Sciences.* **2014**, *28*, 95.
- \*Mossine, V.V.; Barnes, C.L.; Mawhinney, T.P. *J. Carbohydr. Chem.* **2007**, *26*, 249.
- \*Muramulla, S.; Arman, H.D.; Zhao, C.G.; Tiekink, E.R.T. *Acta Crystallogr. E.: Struct. Rep. Online.* **2009**, *65*, o3070.
- \*Mukherjee, R.; McCaddon, A.; Smith, C.A.; Brasch, N.E. *Inorg. Chem.* **2009**, *48*, 9526.
- \*Myasnyanko, I.N.; Lukyanenko, E.R.; Rybakov, V.B.; Kurkin, A.V. *CSD Communication* (Private Communication). **2015**.
- \*Mykhailiuk, P.K.; Shishkina, S.V.; Shishkin, O.V.; Zaporozhets, O.A.; Komarov, I.V. *Tetrahedron.* **2011**, *67*, 3091.
- \*Mykhailiuk, P.K.; Kubyshekin, V.; Bach, T.; Budisa, N. *J. Org. Chem.* **2017**, *82*, 8831.
- \*Nair, C.M.K.; Nagaraj, R.; Ramaprasad, S.; Balaram, P.; Vijayan, M. *Acta Crystallogr. B.* **1981**, *37*, 597.
- \*Subha Nandhini, M.; Krishnakumar, R.V.; Natarajan, S. *Acta Crystallogr. C.* **2001**, *57*, 423.
- \*Naveen, B.; Mudiraj, A.; Khamushavalli, G.; Babu, P.P.; Nagarajan, R. *Eur. J. Med. Chem.* **2016**, *113*, 201, 113.
- \*Nikiforovich, G.V.; Kover, K.E.; Kolodziej, S.A.; Nock, B.; George, C.; Deschamps, J.R.; Flippen-Anderson, J.L.; Marshall, G.R. *J. Am. Chem. Soc.* **1996**, *118*, 959.
- \*Nomoto, K.; Takemoto, T.; Maeda, M.; In, Y.; Doi, M.; Inoue, M.; Ishida, M. *Biochem. Biophys. Res. Comm.* **1992**, *187*, 325.
- \*Novitchi, G.; Vela, S.; Pilet, G.; Train, C.; Robert, V. *Dalton Trans.* **2017**, *46*, 11154.
- \*Nugrahani, I.; Utami, D.; Ibrahim, S.; Nugraha, Y.P.; Uekusa, H. *Eur. J. Pharm. Sci.* **2018**, *117*, 168.
- \*Odame, F.; Hoste, E.C.; Betz, R.; Loob, K.; Tshentu, Z.R. *J. Mol. Struct.* **2015**, *38*, 1099.
- \*Oliver, D.W.; Roos, H.M.; Milne, P.J. *J. Chem. Cryst.* **1995**, *25*, 85.
- \*O'Neil, I.A.; Milner, N.D.; Barkley, J.V.; Low, C.M.R.; Kalindjian, S.B. *Synlett.* **1995**, 617.
- \*Oszbach, G.; Szabo, D.; Argay, G.; Kalman, A.; Neszmelyi, A. *J. Chem. Soc., Perkin Trans. 2.* **1983**, 447.
- \*Panda, M.K.; Runceviski, T.; Husain, A.; Dinnebie, R.E.; Naumov, P. **2015**, *137*, 1895.
- \*Pandey, A.K.; Naduthambi, D.; Thomas, K.M.; Zondlo, N.J. *J. Am. Chem. Soc.* **2014**, *135*(11), 4333.
- \*Pandiarajan, S.; Sridhar, B.; Rajaram, R.K. *Acta Crystallogr. E.* **2002**, *58*, o74.
- \*Pangerl, M.; Hohlein, I.; Trauner, D. *Synlett*, **2014**, *25*, 741.
- \*Panneerselvam, K.; Chacko, K.K. *Acta Crystallogr. C.* **1989**, *106*, 45.
- \*Panneerselvam, K.; Chacko, K.K.; Veena, K.R. *Acta Crystallogr. C.* **1990**, *46*, 81-84.
- \*Pascard, C.; Guilhem, J.; Vincent, M.; Remond, G.; Portevin, B.; Laubie, M. *J. Med. Chem.* **1991**, *34*, 663.
- \*Peifer, C.; Werz, O.; Poeckel, D.; Schollmeyer, D.; Laufer, S. *Acta Crystallogr. E.* **2006**, *62*, o5138.

\*de S. Pereira, A.C.; Kaplan, M.A.C.; Mala, J.G.S.; Gottlieb, O.R.; Nash, R.J.; Fleet, G.; Pearce, L.; Watkin, D.J.; Scofield, A.M. *Tetrahedron*. **1991**, 47, 5637.

\*Pilati, T. *CSD Communication (Private Communication)*. **2007**.

\*Pinalli, R.; Brancatelli, G.; Pedrini, A.; Menozzi, D.; Hernandez, D.; Ballester, P.; Geremia, S.; Dalcanale, E. A. *J. Am. Chem. Soc.* **2016**, 138, 8569.

\*Poulie, C.B.M.; Alcaide, A.; Krell-Jrgensen, M.; Larsen, Y.; Astier, E.; Brjrn-Yoshimoto, W.E.; Yi, F.; Syrenne, J.T.; Storgaard, M.; Nielsen, B.; Frydenvang, K.A.; Jensen, A.A.; Hansen, K.B.; Pickering, D.S.; Bunch, L. *ACS Chemical Neuroscience*, **2019**, 10, 29890.

\*Pradeille, N.; Zerbe, O.; Mohle, K.; Linden, A.; Heimgartner, H. *Chem. Biodiversity*. **2005**, 2, 1127.

\*Priya, G.; Kotmale, A.S.; Chakravarty, D.; Puranik, V.G.; Rajamohana, P.R.; Sanjayan, G.J. *Org. Biomol. Chem.* **2015**, 13, 2087.

\*Qu, X.; Lu, J.; Zhao, C.; Boas, J.F.; Moubaraki, B.; Murray, K.S.; Siriwardana, A.; Bond, A.M.; Martin, L.L. *Angew. Chem. Int. Ed.* **2011**, 50, 1589.

\*Rajagopal, K.; Krishnakumar, R.V.; Mostad, A.; Natarajan, S. *Acta Crystallogr. E*. **2003**, 59, o277.

\*Rajalakshmi, P.; Srinivasan, N.; Krishnakumar, R.V.; Razak, L.A.; Rosli, M.M. *Acta Crystallogr. E*. **2013**, 69, 01297.

\*Ramanathan, C.R.; Periasamy, M. *Tetrahedron: Asymm.* **1998**, 9, 2651.

\*Ranatunga, S.; Del Valle, J.R. Synthesis of Boc-protected bicycloproline. *Tetrahedron Lett.* **2009**, 50, 2464.

\*Rao, S.T.; Mallikarjunan, M. *ACS*. **1974**, 243.

\*Ray, J.K.; Roy, B.C.; Chinnakali, K.; Razak, I.A.; Fun, H.K. *Acta Crystallogr. C*. **1997**, 53, 1622.

\*Rayner, P.J.; Smith, J.C.; Denneval, C.; O'Brien, P.O.; Clarke, P.A.; Horan, R.A. *J. Chem. Commun.* **2016**, 52, 1354.

\*Razzakov, N.A.; Tashkhodzhaev, B.; Aripova, S.F.; Tozhibaev, A.A. *Khim. Prir. Soedin.* **2005**, 46.

\*Renzi, P.; Overgaard, J.; Bella, M. *Org. Biomol. Chem.* **2010**, 8, 980.

\*Reuter, C.; Opitz, R.; Soicke, A.; Dohmen, S.; Barone, M.; Chiha, S.; Klein, M.T.; Neudorfl, J.M.; Kuhne, R.; Schmalz, H.G. *Chem. Eur. J.* **2015**, 21, 8464.

\*Rheingold, A.L. *CSD Communication (Private Communication)*. **2019**.

\*Rogowska, P.; Cyranski, M.K.; Sporzynski, A.; Ciesielski, A. *Tetrahedron Lett.* **2006**, 47, 1389.

\*Roy, R.; Deb, J.; Jana, S.S.; Dastidar, P. *Chem. Asian J.* **2014**, 9, 3196.

\*Roy, R.; Dastidar, P. *Chem. Eur. J.* **2016**, 22, 14929.

\*Sagnard, I.; Sasaki, N.A.; Chiaroni, A.; Riche, C.; Potier, P. *Tetrahedron Lett.* **1995**, 36, 3149.

\*Sakai, R.; Oiwa, C.; Takaishi, K.; Kamiya, H.; Tagawa, M. *Tetrahedron Lett.* **1999**, 40, 6941.

\*Salonen, P.; Peuronen, A.; Sinkhonen, J.; Lehtonen, A. *Inorg. Chim. Acta*. **2019**, 489, 108.

\*Sasada, K. *Acta Crystallogr.* **1961**, 14, 1305.

\*Sasaki, N.A.; Pauly, R.; Fontaine, C.; Chiaroni, A.; Riche, C.; Potier, P. *Tetrahedron Lett.* **1994**, 35, 241.

\*Sawka-Dobrowolska, W.; Barycki, J. *Acta Crystallogr. C*. **1989**, 45, 606.

\*Schollmeyer, D. *CSD Communication (private communication)*. **2016**.

\*Seijas, L.E.; Delgado, G.E.; Mora, A.J.; Bahsas, A.; Briceno, A. *Acta Crystallogr. C*. **2007**, 63, o303.

\*Shamala, N.; Row, T.N.G.; Venkatesan, K. *Acta Crystallogr. B*. **1976**, 32, 3267.

\*Slepokura, K.; Gawlowska, M. *Acta Crystallogr. C*. **2005**, 61, o25.

\*Slyudkin, O.P.; Minacheva, L.Kh.; Kerzhenstsev, M.A.; Sadikov, G.G.; Antsyshkina, A.S.; Porai-Koshits, M.A. *Koord. Khim.* **1980**, 6, 1097.

\*Smith, G.D.; Pletnev, V.Z.; Duax, W.L.; Balasubramanian, T.M.; Bosshard, H.E.; Czerwinski, E.W.; Kendrick, N.E.; Mathews, F.S.; Marshall, G.E. *J. Am. Chem. Soc.* **1981**, 103, 1493.

\*Song, Y.; Wang, L.Y.; Liu, F.; Li, Y.T.; Wu, Z.Y.; Yan, C.W. *CrystEngComm*. **2019**, 21, 3064.

\*Sowmya, N.S.; Vidyalakshmi, S.; Sampathkrishnan, S.; Srinivasan, T.; Velmurugan, D. *Acta Crystallogr. R*. **2013**, 69, o1723.

\*Sridhar Prasad, G.; Vijayan, M. *Acta Crystallogr. B*. **1993**, 49, 348.

\*Stavytskyi, V.; Voskoboinik, O.; Krasovska, N.; Shabelnyk, K.; Konovalova, I.; Shishkyna, S.; Kholodniak, S.; Kovalenko, S. *J. Heterocycl. Chem.* **2020**, 57.

\*Stoykova, S.A.; Linden, A.; Heimgartner, H. *Acta Crystallogr. E*. **2013**, 69, o419.

\*Surov, A.O.; Voronin, A.P.; Vener, M.V.; Churakov, A.V.; Perlovich, G.L. *CrystEngComm*. **2018**, 20, 6970.

\*Swaminathan, S.; Chacko, K.K. *Cryst.Struct.Commun.* **1981**, 10, 469.

\*Taira, Z.; Watson, W.H. *Acta Crystallogr. B*. **1977**, 33, 3823.

\*Tanaka, J.; Kozima, T.; Ashida, T.; Tanaka, N.; Kakudo, M. Benzyloxycarbonylglycyl-L-proline. *Acta Crystallogr. B*. **1977**, 33, 116.

\*Tarnawski, M.; Slepokura, K.; Kulis-Orzechowska, R.; Szelepin, B. *Carbohydr. Res.* **2007**, 342, 1264.



- \*Tilborg, A.; Springuel, G.; Norberg, B.; Wouters, J.; Leyskens, T. *CrystEngComm*, **2013**, 15, 3341.
- \*Timofeeva, T.V.; Kuhn, G.H.; Nesterov, V.V.; Nesterov, V.N.; Frazier, D.O.; Penn, B.G.; Antipin, M.Y. *CrystGrowthDes.* **2003**, 3, 383.
- \*Tlahuext, H.; Rosas-Valdez, E.; Lopez-Cardoso, M.; Roman-Bravo, Vargas-Pindea, G.; Montiel-Palma, V.; Cotero-Villegas, A.M.; del C. Perez-Redondo, M.; Dea-Olivares, R. *J. Mol. Struct.* **2018**, 68, 1169.
- \*Tolmachova, N.A.; Kondratov, I.S.; Dolovanyuk, V.G.; Pridma, S.O.; Chernykh, A.V.; Daniliuc, C.G.; Haufe, G. *Chem. Commun.* **2018**, 54, 9683.
- \*Torbeev, V.Y.; Fumi, E.; Ebert, M.O.; Schweizer, W.B.; Hilvert, D. *Helv. Chim. Acta*, **2012**, 95, 2411.
- \*Toscano, R.A.; Enriquez, R.G.; Reynolds, W.F.; Magos, G.A.I. Gnecco, D. *Acta Crystallogr. C*. **1997**, 53, 1690.
- \*Tumanova, N.; Tumanov, N.; Robeyns, K.; Fischer, F.; Fusaro, L.; Morelle, F.; Ban, V.; Hautier, G.; Filinchuk, Y.; Wouters, J.; Leyskens, T.; Emmerling, F. *Cryst. Growth Des.*, **2018**, 18, 954.
- \*Turdybekov, K.M.; Nurmagambetov, Zh.S.; Zharylgasina, G.T.; Anaev, A.A.; Turmunchambetov, A. Zh.; Mamamdaliyev, S.M.; Adekenov, S.M. *Pharmazevitscheskii Bulletin.* **2013**, 138.
- \*Ueki, T.; Bando, S.; Ashida, T.; Kakudo, M. *Acta Crystallogr. B*. **1971**, 27, 2219.
- \*Vamos, M.; Ozboya, K.; Kobayashi, Y. *Synlett*. **2007**, 1595.
- \*Vartak, A.P.; Johnson, R.L. *Org. Lett.* **2006**, 8, 983.
- \*Vasiuta, R.I.; Gorichko, M.V. *Tetrahedron Lett.* **2014**, 55, 466.
- \*Venkatesan, G.; Babu, G.A.; Ramasamy, P.; Chandramohan, A. *J. Mol. Struct.* **2013**, 1033, 121.
- \*Venkateshan, M.; Suresh, J. *J. Mol. Struct.* **2019**, 1180, 826.
- \*Viostat, B.; Khodadad, P.; Roder, N.; Guillard, O. *Acta Crystallogr. C*. **1990**, 46, 894.
- \*Voissat, B.; Michelet, A.; Khodadad, P.; Rodier, N. *Acta Crystallogr. C*. **1990**, 46, 1733.
- \*Wang, W.; Gu, J.; Zou, X.; Tong, W.; Gong, H. *Tetrahedron Lett.* **2015**, 56, 2684.
- \*Wang, N.; Du, S.; Li, D.; Jiang, X. *Org. Lett.* **2017**, 19, 3167.
- \*Wasserman, H.H.; Henke, S.L.; Nakanishi, E.; Schulte, G. *J. Org. Chem.*, **1992**, 57, 2641.
- \*Watase, H.; Tomiie, Y.; Nitta, L. *Bull. Chem. Soc. Jpn.* **1958**, 31, 714.
- \*Wartchow, J.; Kruger, J.; Habermehl, G.G. *CSD Communication (Private Communication)*. **2014**.
- \*Watson, W.H.; Galloy, J.; Steglich, W.; Klein, C. *Acta Crystallogr. C*. **1983**, 39, 1240.
- \*Webb, T.R.; Eigenbrot, C. *J. Org. Chem.* **1991**, 56, 3009.
- \*Wen, Y.; Sheng, T.; Hu, S.; Ma, X.; Tan, C.; Wang, Y.; Sun, Z.; Xue, Z.; Wu, X. *Chem. Commun.* **2013**, 49, 10644.
- \*Wilhelm, P.; Lewandowski, B.; Trapp, N.; Wennemers, H. *J. Am. Chem. Soc.* **2014**, 136, 15829.
- \*Williams, G.D.; Wade, C.E.; Clarkson, G.J.; Wills, M. *Tetrahedron: Asymm.* **2007**, 18, 664.
- \*Wittland, C.; Florke, U.; Risch, N. *Synthesis*. **1997**, 1291.
- \*Wojnarska, J.; Ostrowska, K.; Gryl, M.; Stadnicka, K.M. *Acta Crystallogr. C*. **2019**, 75, 1228.
- \*Wu, S.; Tinant, B.; Declercq, J.P.; van Meersche, M. *Bull. Soc. Chim. Belg.* **1987**, 96, 437.
- \*Xinghua, F.; Jianjian, F.; Aizong, Z.; Juan, Y.; Guangke, H.; Hongjun, Z.; Huaxue, Y. *Chin.J.Org.Chem.*, **2014**, 34, 1616.
- \*Yadav, B.; Balasubramanian, S.; Chavan, R.B.; Thipparaboina, R.; Naidu, V.G.M.; Shastri, N.R. *Cryst. Growth Des.* **2018**, 18, 1047.
- \*Yapp, D.T.T.; Steed, J.W.; Houghton, P. *J. Acta Crystallogr. E*. **2002**, 58, o988.
- \*Yuan, J.; Cai, Z.Q.; Huang, C.J.; Xu, W.R. *Acta Crystallogr. E*, **2010**, 66, o3258.
- \*Zhang, J.; Lei-Lei, L.; Zou, H.H.; Chen, J.J.; Yu, K.B.; Xie, R.G. *Chin. J. Chem.* **2004**, 22, 585.
- \*Zhang, J.; Guo, D.S.; Wang, L.H.; Wang, Z.; Liu, Y. *Soft Matter*. **2011**, 7, 1756.
- \*Zhang, L.; Zhang, C.J.; Zhang, D.B.; Wen, J.; Wei-Zhao, X.; Li, Y.; Gao, K. *Tetrahedron Lett.* **2014**, 55, 1815.
